# Supplementary material for: Antibody escape and global spread of SARS-CoV-2 lineage A.27
Source: PubMed Central journal article supplement (PMC8894356; doi:10.1038/s41467-022-28766-y), 2022-03-03
Supplement: 41467_2022_28766_MOESM1_ESM.pdf [file 41467_2022_28766_MOESM1_ESM.pdf]

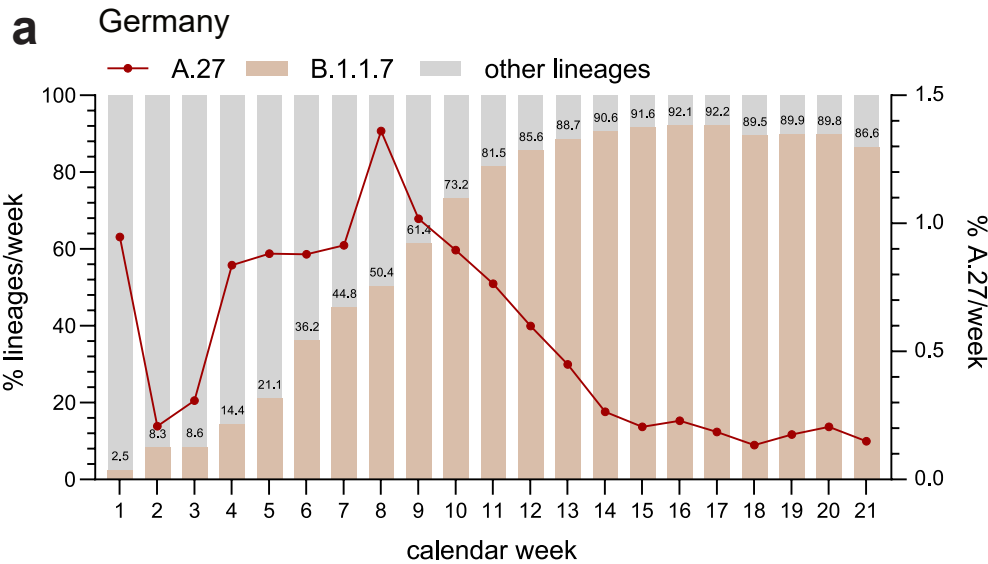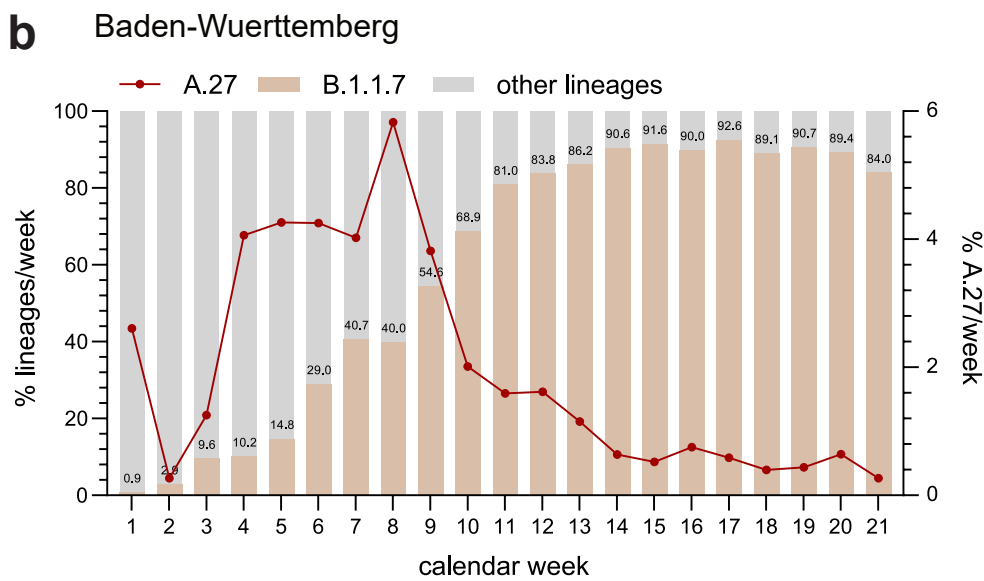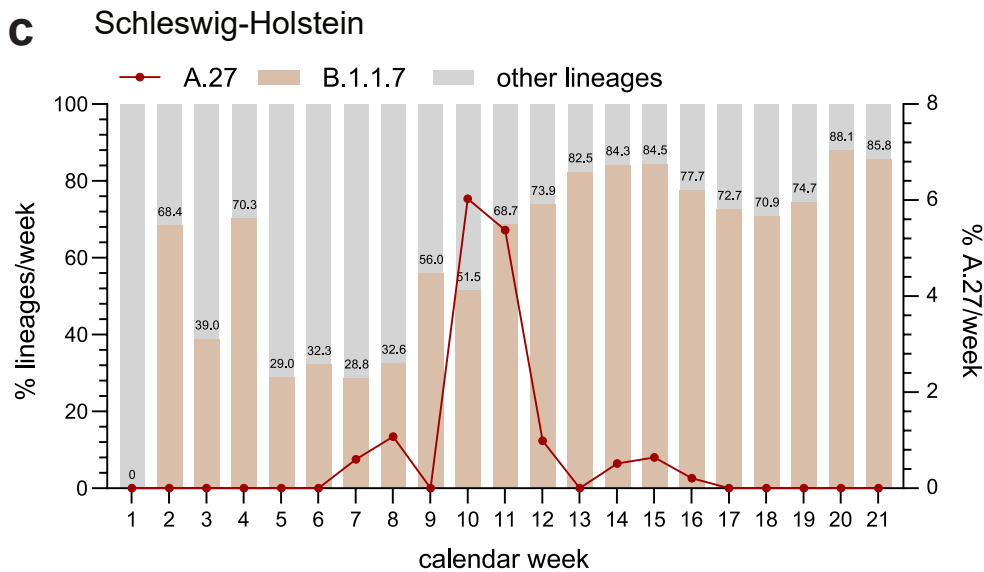

**Supplementary Fig. 1 Decrease in sequenced A.27 patient samples in comparison to the increase of B.1.1.7 sequences.** Frequencies of detected sequences belonging to the A.27, B.1.1.7 or other lineages between calendar week 1 and 21 of 2021 for (a) Germany, (b) Baden-Wuerttemberg and (c) Schleswig-Holstein based on all available data from the RKI.

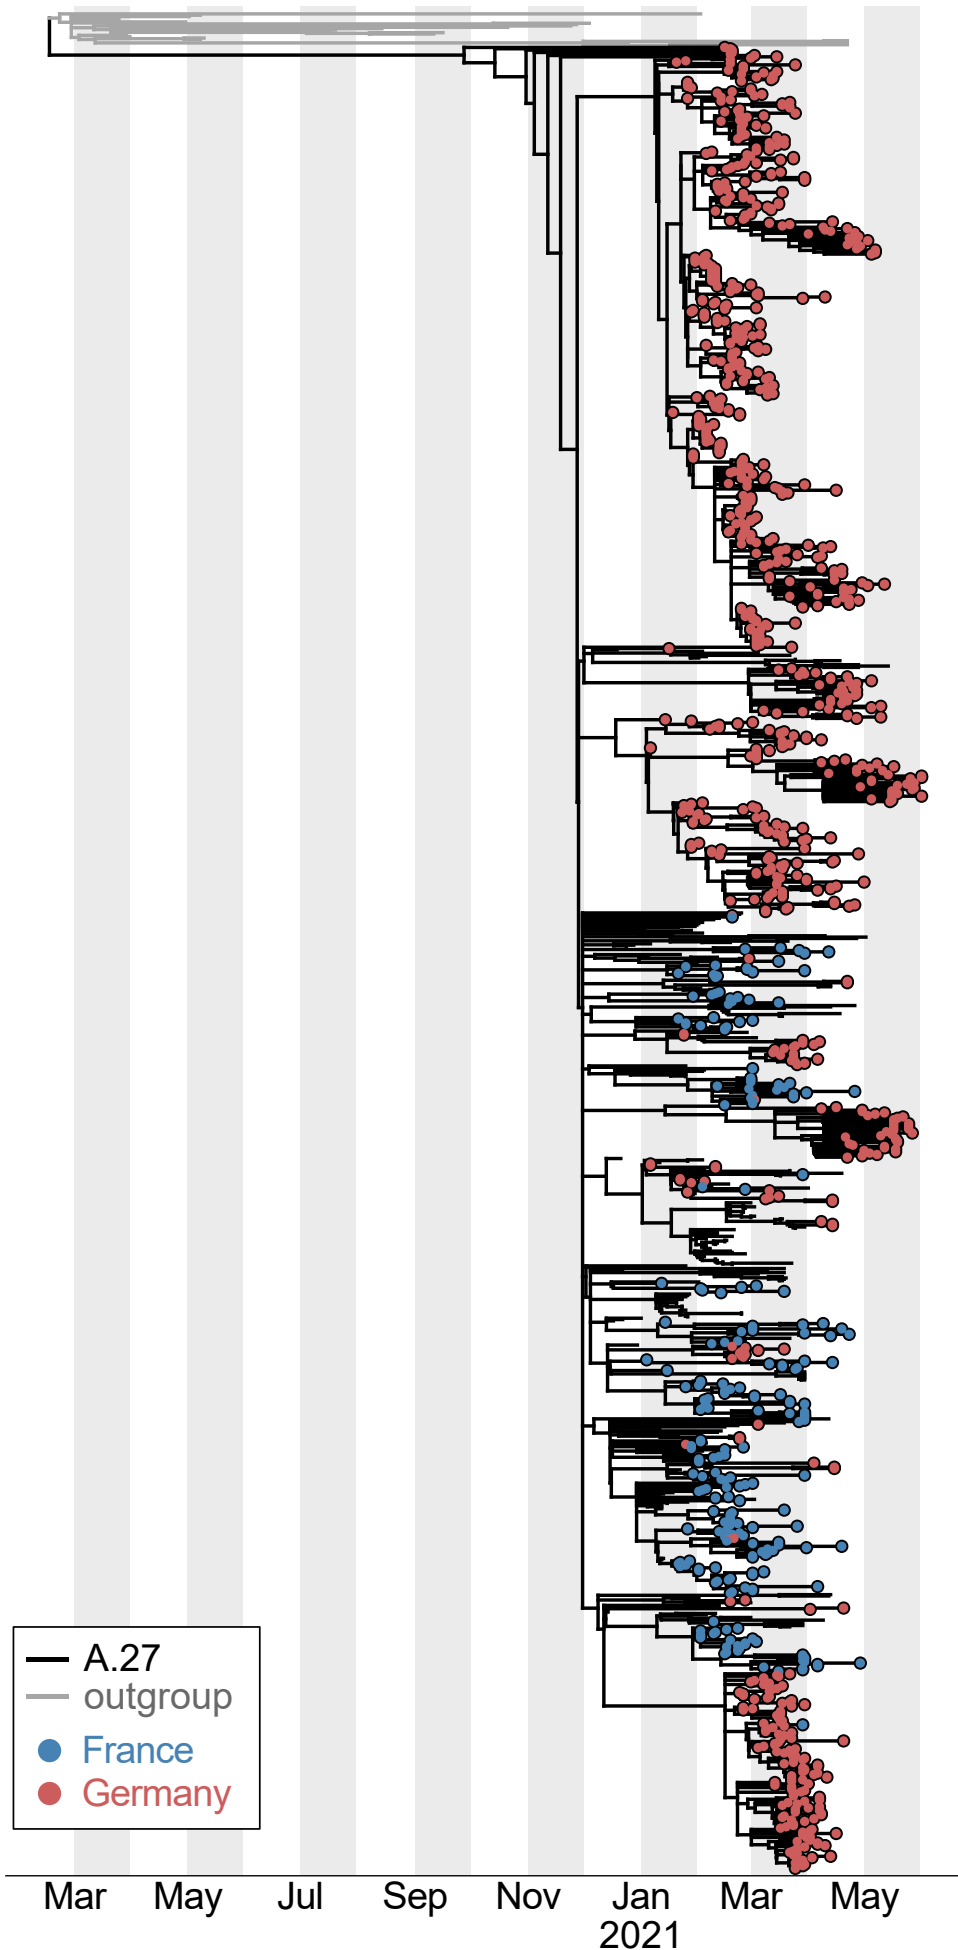

**Supplementary Fig. 2 Maximum-likelihood phylogeny of the A.27 lineage.** Time-calibrated phylogeny on the entire dataset of 1,383 sequences, with French and German nodes coloured, and an outgroup consisting of 25 non-A27 ancestral sequences, coloured in grey.

replicate 1

replicate 2

replicate 3

replicate 4

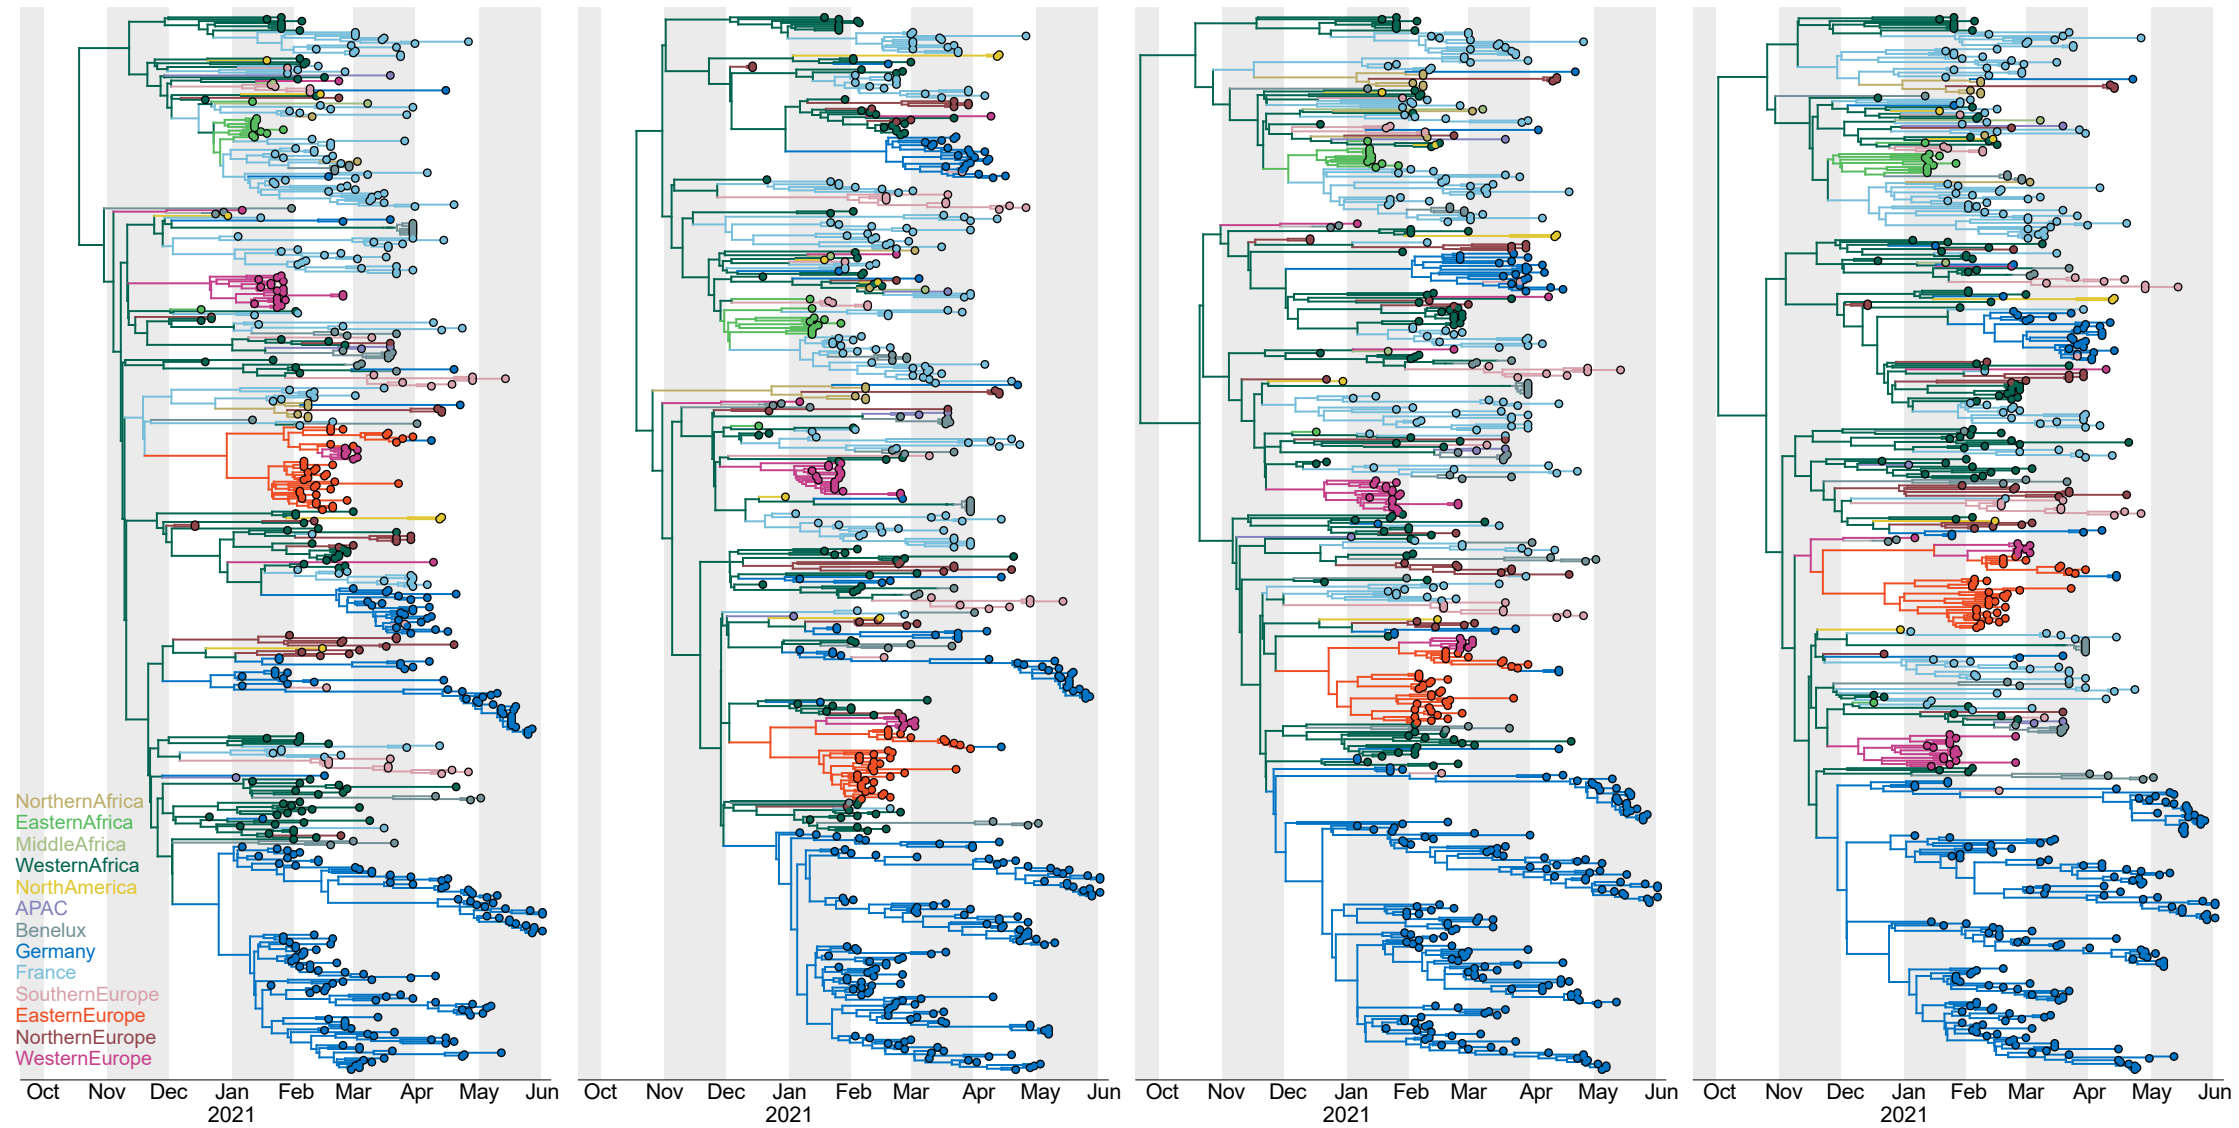

**Supplementary Fig. 3 Region-annotated phylogenies for four additional replicate phylogeographic analyses.** Four additional replicates of the analysis shown in Fig. 2 (c) confirm an inferred origin of the A.27 lineage in Western Africa with subsequent spread to most of the other regions. Smaller white circles represent posterior support >0.5, whereas bigger black circles represent posterior support >0.95. Colours correspond to those in Fig. 2 (c).

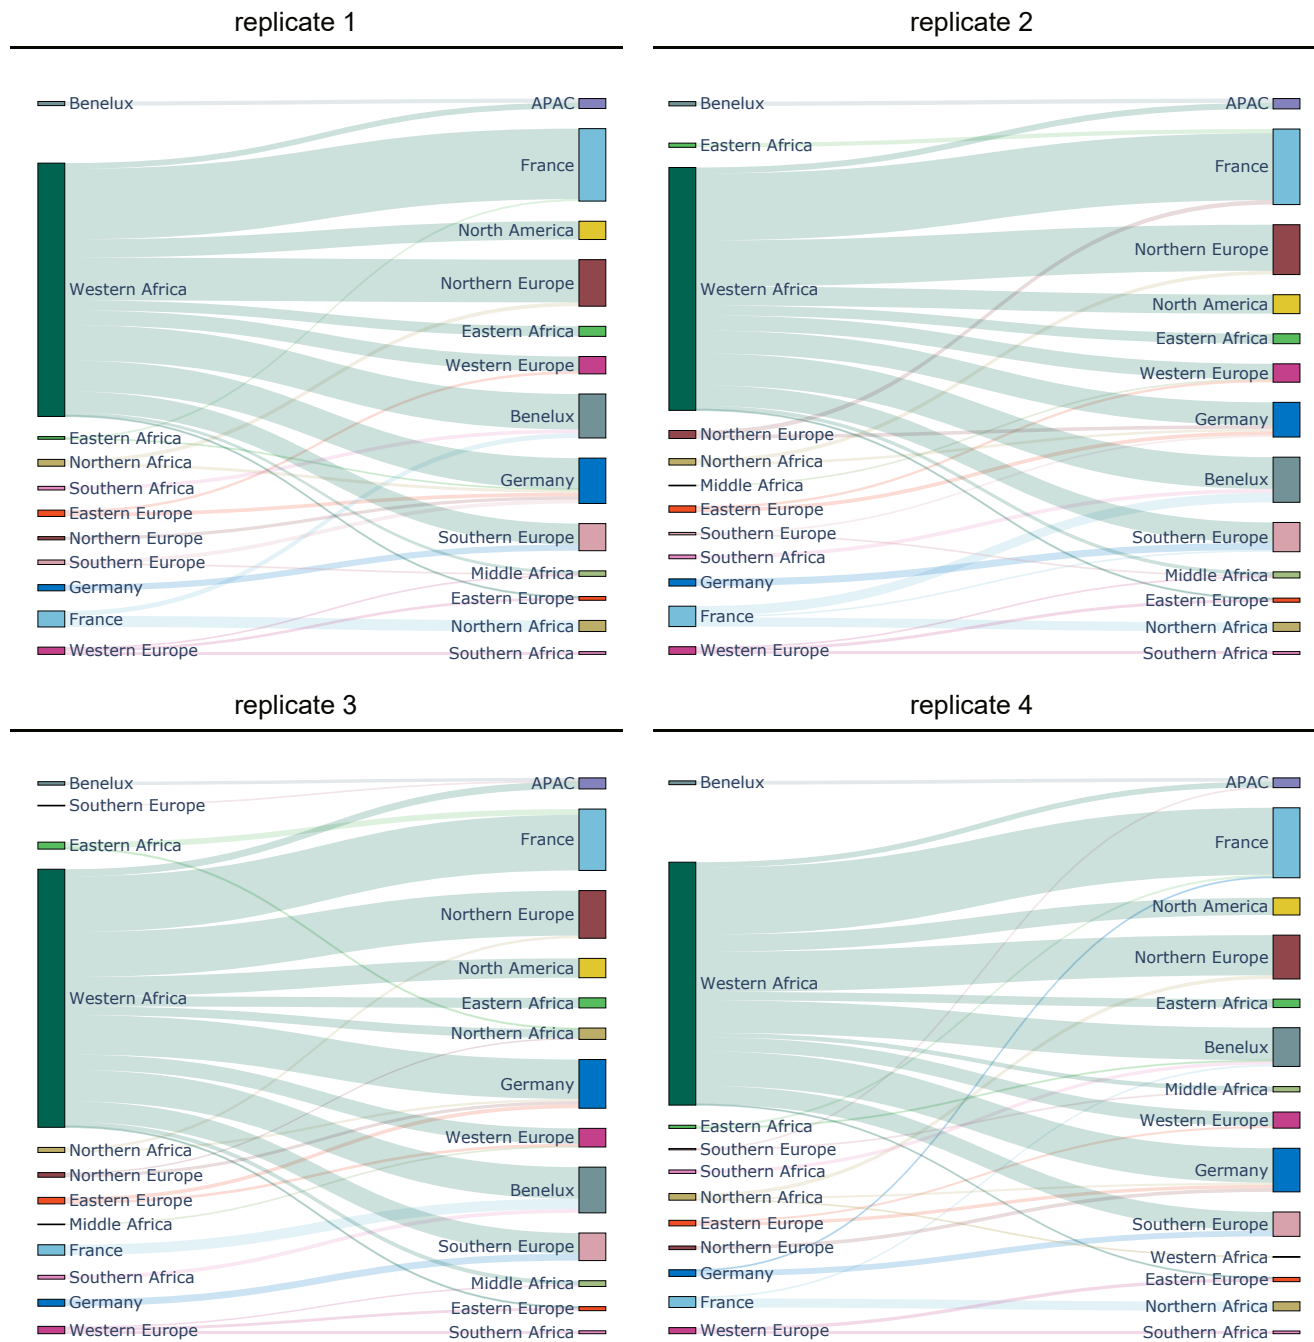

**Supplementary Fig. 4 Sankey plots for four additional replicate phylogeographic analyses.** In order to test the effects of possible sampling bias, we performed the travel history-aware phylogeographic analysis an additional four times, using a different random sampling selection each time. Transitions are shown from the regions on the left into the regions on the right. Line thickness corresponds to the number of estimated Markov jumps between these regions. As for Fig. 2 (b), only transitions with a Bayes Factor above 3 are shown, pointing to strong support for an inferred origin of the A.27 lineage in Western Africa across all replicates. Colours correspond to those in Fig. 2.

none A T C G INDEL

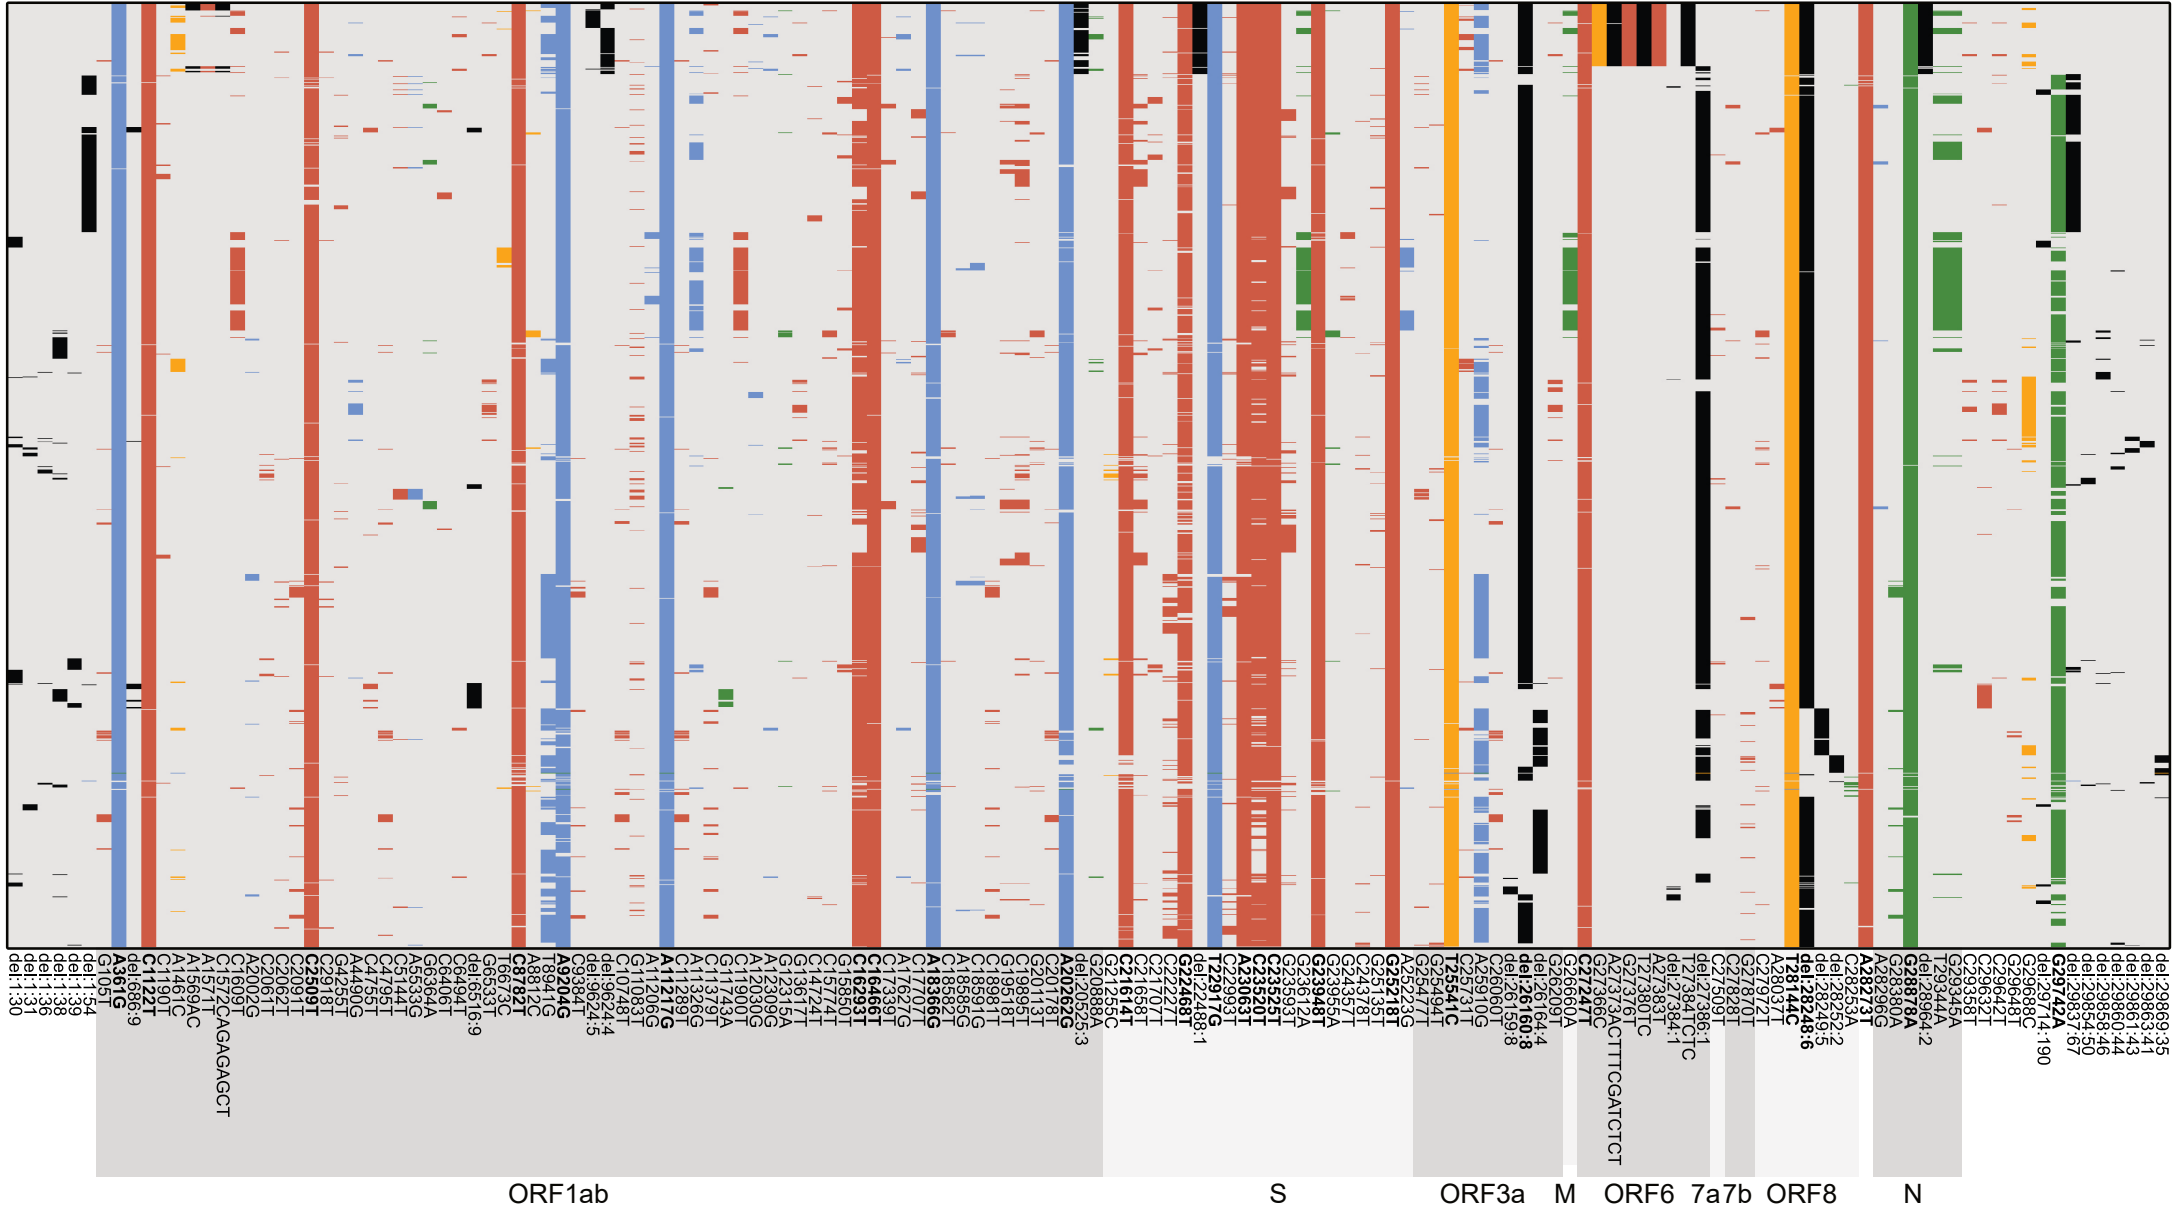

**Supplementary Fig. 5 Nucleotide substitutions found in more than 1% of A.27 sequences.** Nucleotide genome profiles of all A.27 sequences were defined in comparison to Wuhan-Hu-1 (NC\_045512.2) using covSonar (<https://gitlab.com/s.fuchs/covsonar>). All mutations exceeding a total frequency of 1 % were visualized using the R pheatmap package. Mutations exceeding a frequency of 75 % are indicated in bold font.

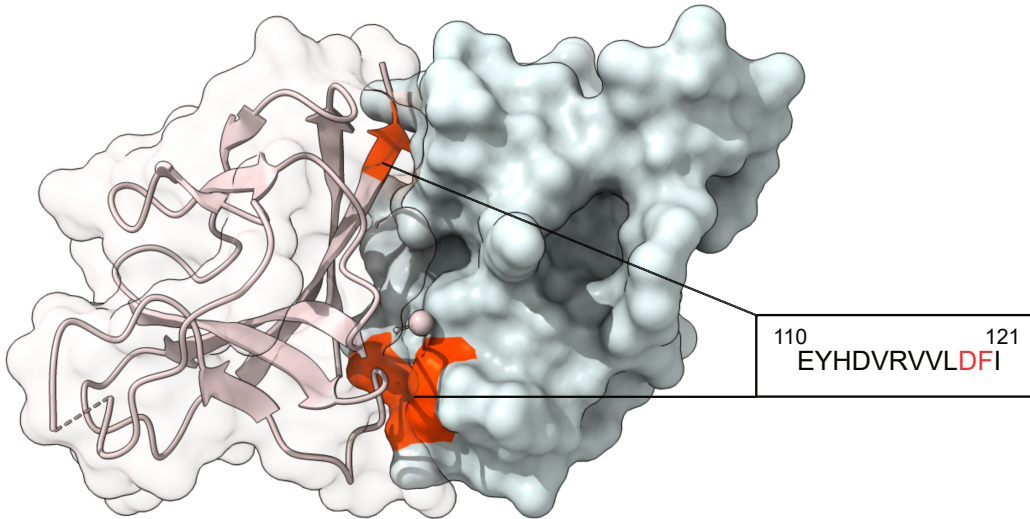

**Supplementary Fig. 6 3D structure of homodimeric ORF8.** ORF8 homodimer of SARS-CoV-2 (PDB accession number: 7jtl) with one monomer shown in surface presentation (grey) and the other monomer shown in transparent surface/cartoon presentation. The region of the 119/120 deletion is marked in red.

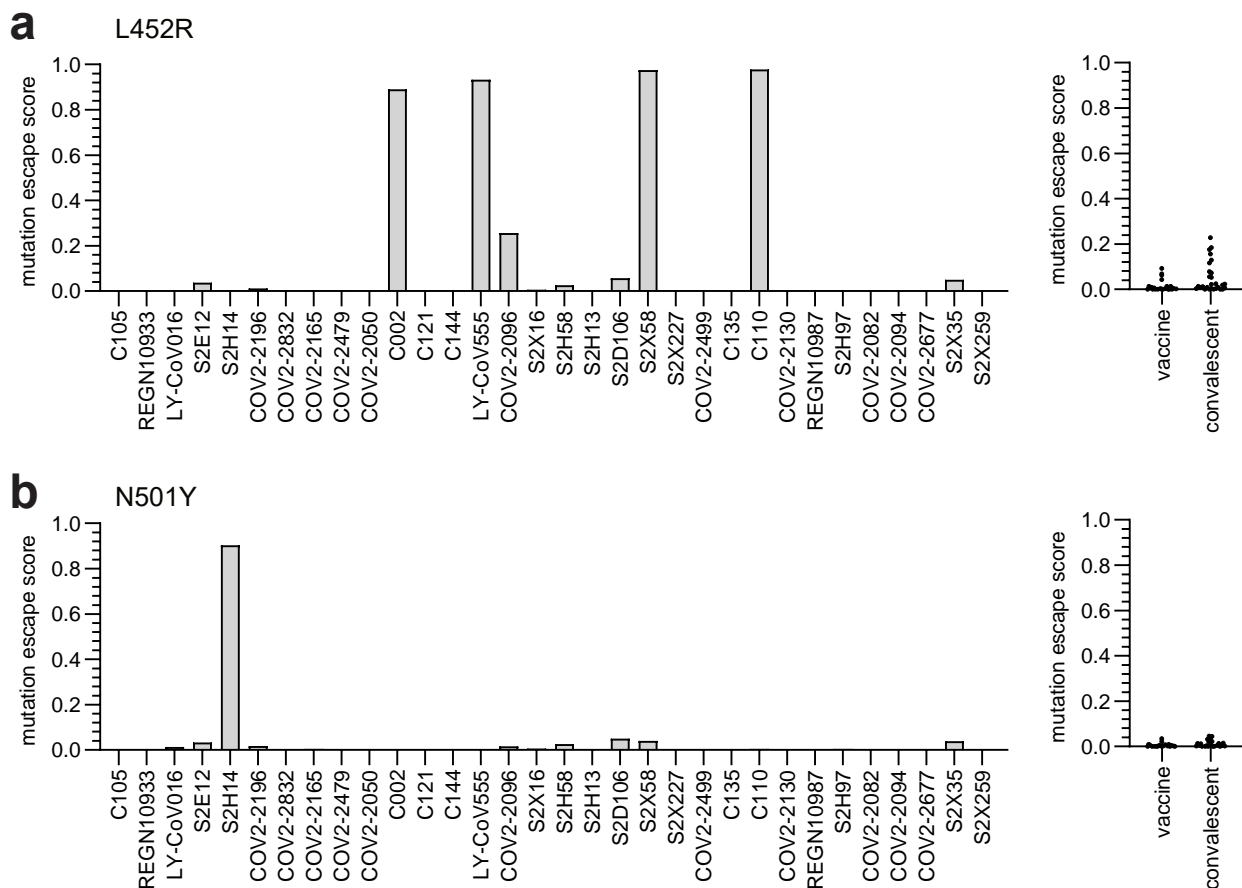

**Supplementary Fig. 7 Binding data of different monoclonal antibodies and polyclonal sera with the RBD spike mutants L452R and N501Y.** Binding data between SARS-CoV-2 RBD mutants and different monoclonal antibodies generated by the Bloom lab ([https://github.com/jbloomlab/SARS2\\_RBD\\_Ab\\_escape\\_maps](https://github.com/jbloomlab/SARS2_RBD_Ab_escape_maps)) were subset for the L452R and N501Y mutation. Shown are the mutation escape scores.

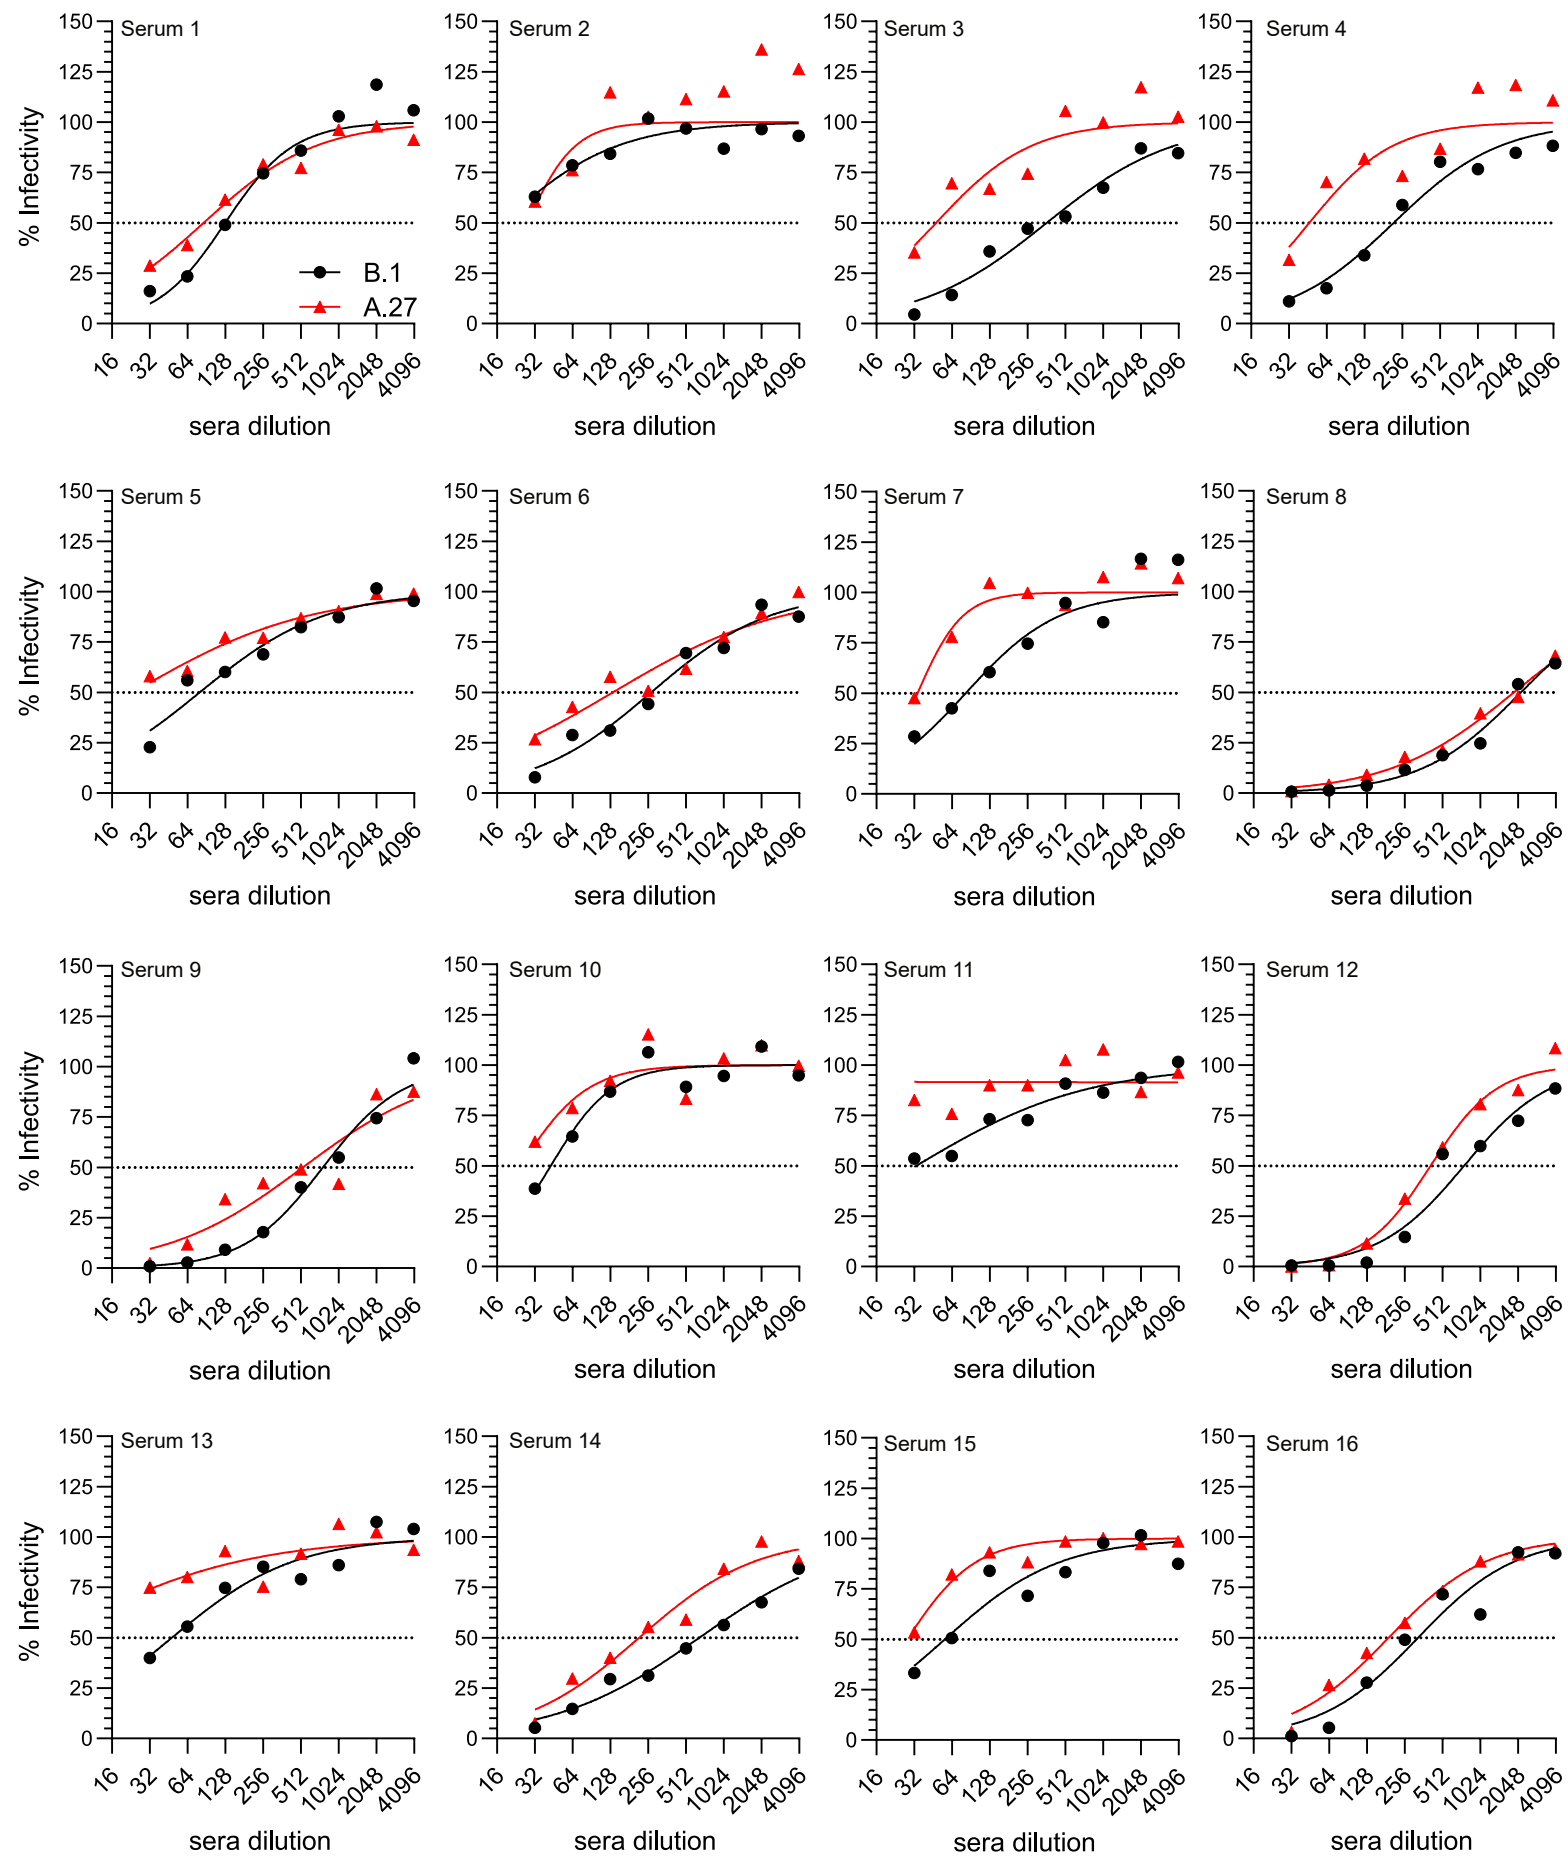

**Supplementary Fig. 8** Plaque reduction assays of convalescent sera. Neutralizing activity of convalescent sera against B.1 (grey) or A.27 (red). 100 pfu of each virus was incubated with serial 2-fold sera dilutions and analysed by plaque assay in biological duplicates. Shown are the mean of the individual dilutions and the respective curve fits.

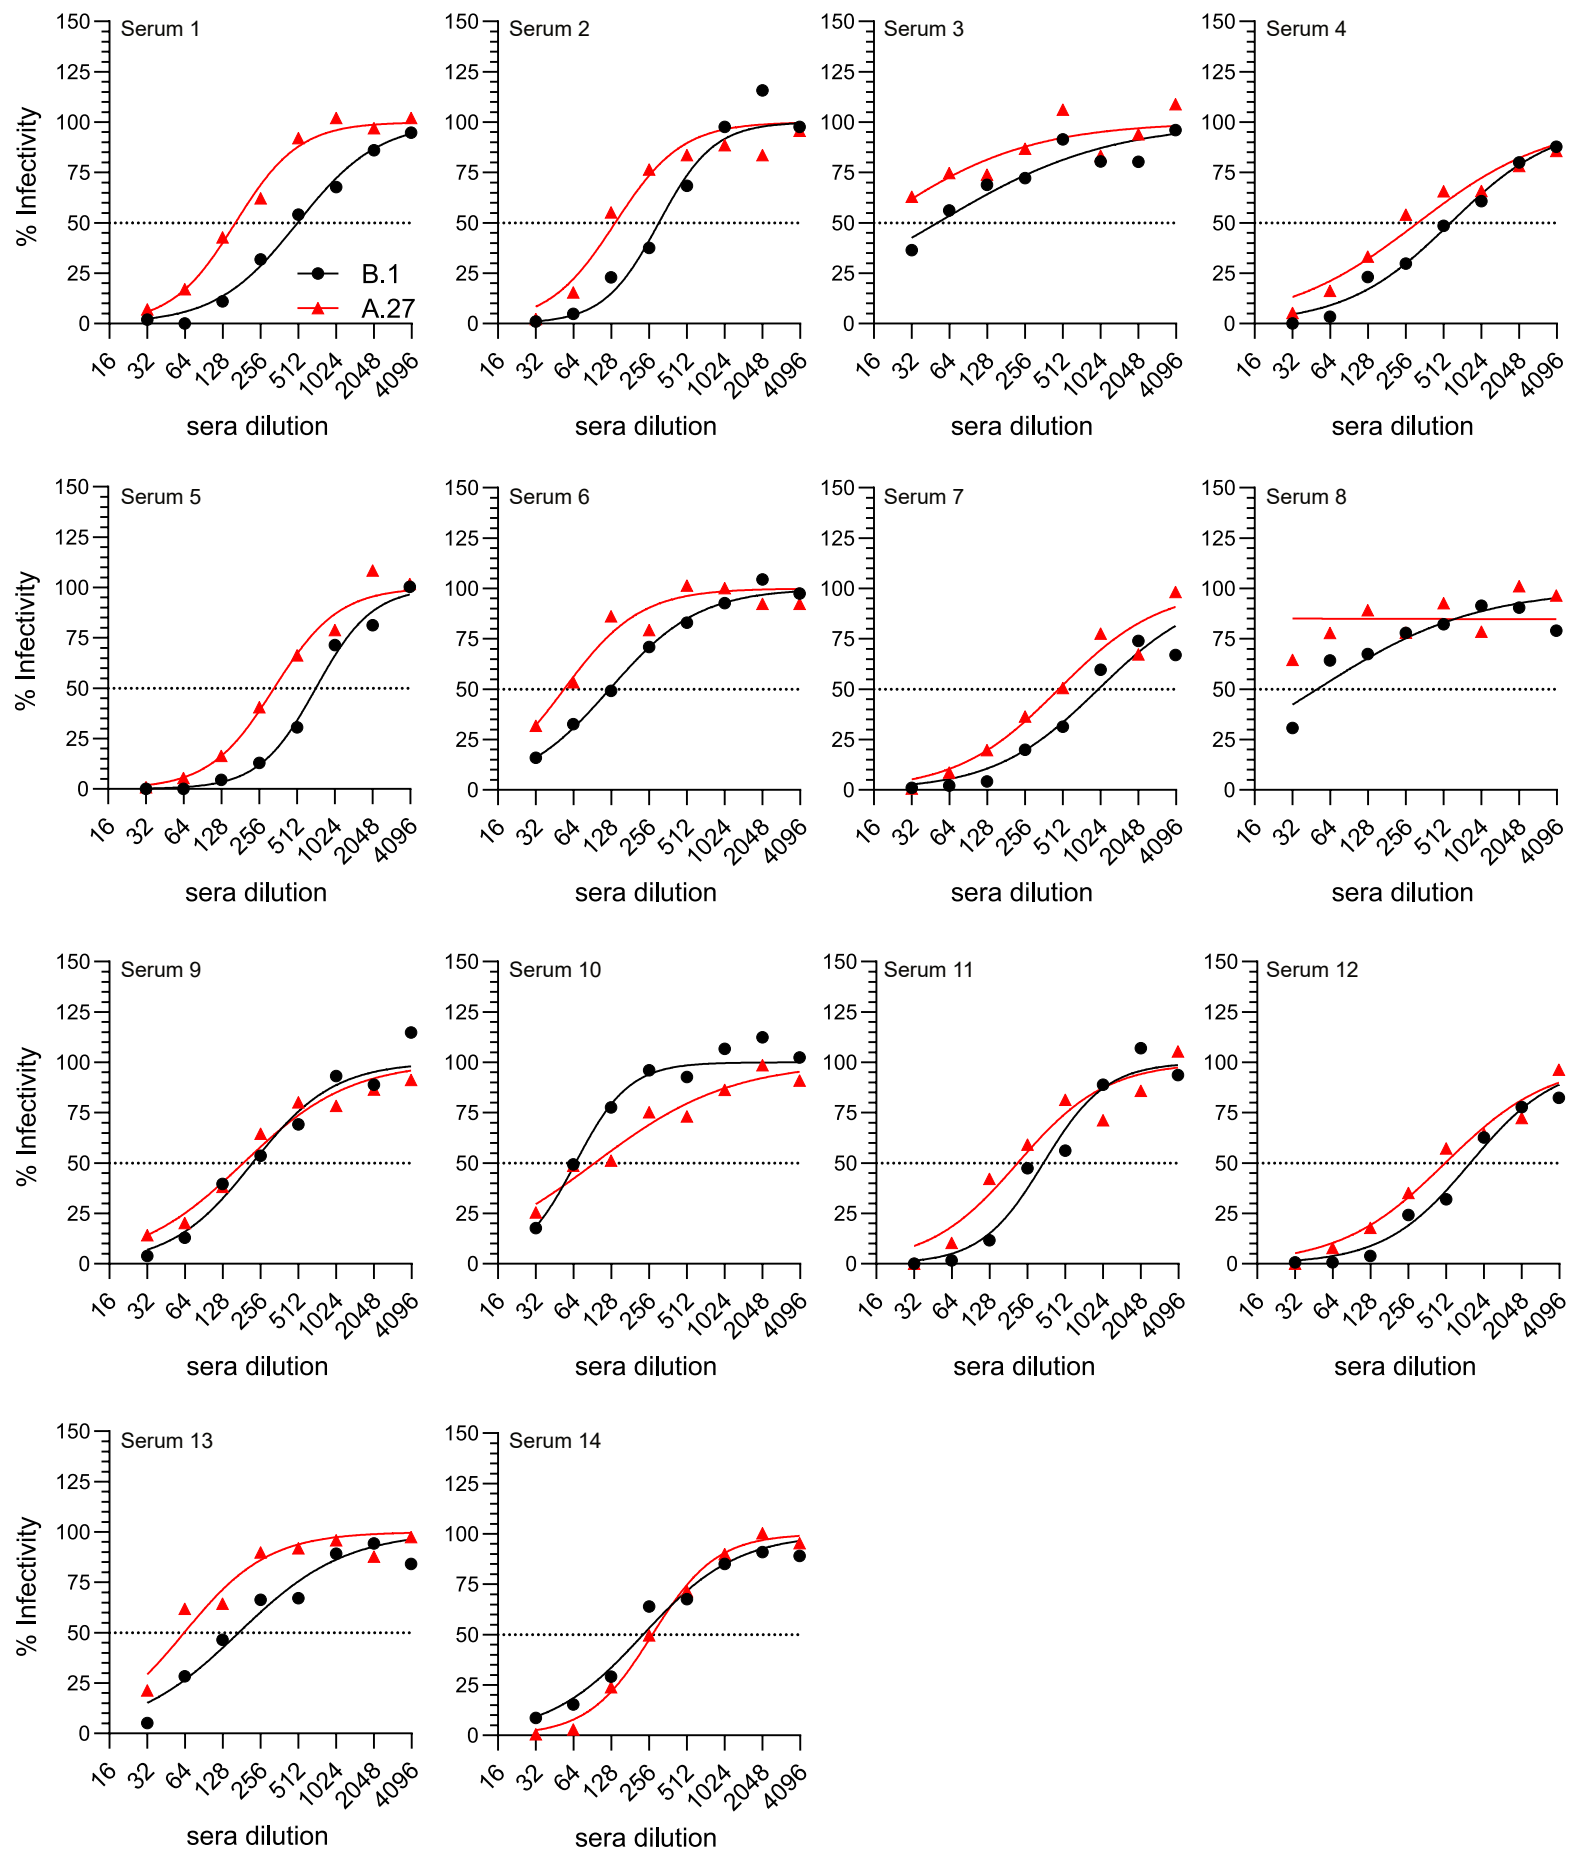

**Supplementary Fig. 9** Plaque reduction assays of sera from BioNTech BNT162b2 vaccinees. Neutralizing activity of sera from BioNTech BNT162b2 vaccinees against B.1 (grey) or A.27 (red). 100 pfu of each virus was incubated with serial 2-fold sera dilutions and analysed by plaque assay in biological duplicates. Shown are the mean of the individual dilutions and the respective curve fits.



**Supplementary Table 1 Individual travel histories collected for the core A.27 genomic data set analysed in this study.** These documented travel cases, all from Western and Southern Africa into Europe, were retrieved from the labs that submitted the corresponding genomes to GISAID.

| Sequence name                                                          | Accession ID    | Sampling date         | Sampling location | Travel origin                  |
|------------------------------------------------------------------------|-----------------|-----------------------|-------------------|--------------------------------|
| hCoV-19/Belgium/rega-6126/2021 EPI_ISL_2404564 2021-03-30 Benelux      | EPI_ISL_2404564 | Belgium (Benelux)     | 2021-03-30        | Mali (Western Africa)          |
| hCoV-19/Belgium/rega-6127/2021 EPI_ISL_2404565 2021-03-30 Benelux      | EPI_ISL_2404565 | Belgium (Benelux)     | 2021-03-30        | Mali (Western Africa)          |
| hCoV-19/Belgium/rega-6128/2021 EPI_ISL_2404566 2021-03-30 Benelux      | EPI_ISL_2404566 | Belgium (Benelux)     | 2021-03-30        | Mali (Western Africa)          |
| hCoV-19/Belgium/rega-6129/2021 EPI_ISL_2404567 2021-03-30 Benelux      | EPI_ISL_2404567 | Belgium (Benelux)     | 2021-03-30        | Mali (Western Africa)          |
| hCoV-19/Belgium/rega-6130/2021 EPI_ISL_2404568 2021-03-30 Benelux      | EPI_ISL_2404568 | Belgium (Benelux)     | 2021-03-30        | Mali (Western Africa)          |
| hCoV-19/Belgium/rega-6131/2021 EPI_ISL_2404569 2021-03-30 Benelux      | EPI_ISL_2404569 | Belgium (Benelux)     | 2021-03-30        | Mali (Western Africa)          |
| hCoV-19/Belgium/rega-6132/2021 EPI_ISL_2404570 2021-03-30 Benelux      | EPI_ISL_2404570 | Belgium (Benelux)     | 2021-03-30        | Mali (Western Africa)          |
| hCoV-19/Belgium/rega-5023/2021 EPI_ISL_1382686 2021-03-03 Benelux      | EPI_ISL_1382686 | Belgium (Benelux)     | 2021-03-3         | Burkina Faso (Western Africa)  |
| hCoV-19/Belgium/rega-5443/2021 EPI_ISL_2403956 2021-03-22 Benelux      | EPI_ISL_2403956 | Belgium (Benelux)     | 2021-03-22        | Burkina Faso (Western Africa)  |
| hCoV-19/Belgium/rega-5484/2021 EPI_ISL_2403997 2021-03-05 Benelux      | EPI_ISL_2403997 | Belgium (Benelux)     | 2021-03-5         | Burkina Faso (Western Africa)  |
| hCoV-19/Netherlands/ZH-EMC-1312/2020 EPI_ISL_801441 2020-12-24 Benelux | EPI_ISL_801441  | Netherlands (Benelux) | 2020-12-24        | South Africa (Southern Africa) |
| hCoV-19/Netherlands/ZH-EMC-1313/2020 EPI_ISL_801442 2020-12-28 Benelux | EPI_ISL_801442  | Netherlands (Benelux) | 2020-12-28        | South Africa (Southern Africa) |

**Supplementary Table 2 GISAID accession numbers.** We gratefully acknowledge the following authors from the originating laboratories responsible for obtaining the specimens, as well as the submitting laboratories where the genome data were generated and shared via GISAID, on which this research is based. All submitters of data may be contacted directly via [www.gisaid.org](http://www.gisaid.org). Authors are sorted alphabetically.

| Accession ID                                                                                    | Originating Laboratory                                                                                                                                                                                                                                                   | Submitting Laboratory                                                                                                                                                                                                                                                                                                                                                    | Authors                                                                                                                                                                                                                                                                                                                                                                                                                                                                                                                                                                     |
|-------------------------------------------------------------------------------------------------|--------------------------------------------------------------------------------------------------------------------------------------------------------------------------------------------------------------------------------------------------------------------------|--------------------------------------------------------------------------------------------------------------------------------------------------------------------------------------------------------------------------------------------------------------------------------------------------------------------------------------------------------------------------|-----------------------------------------------------------------------------------------------------------------------------------------------------------------------------------------------------------------------------------------------------------------------------------------------------------------------------------------------------------------------------------------------------------------------------------------------------------------------------------------------------------------------------------------------------------------------------|
| EPI_ISL_1167046,<br>EPI_ISL_1167049,<br>EPI_ISL_1167053                                         | "Dr. Andrija Stampar" Teaching Institute of Public Health, Department of Clinical Microbiology                                                                                                                                                                           | Istituto di Genomica Applicata                                                                                                                                                                                                                                                                                                                                           | Davide Scaglione; Eleonora Paparelli; Fedrica Cattonaro; Gabriele Magris; Irena Jurman; Jasmina Vranes; Michele Morgante; Slobodanka Radovic; Vera Vendramin                                                                                                                                                                                                                                                                                                                                                                                                                |
| EPI_ISL_996004                                                                                  | "Dr. Andrija Stampar" Teaching Institute of Public Health, Department of Clinical Microbiology                                                                                                                                                                           | Institute of Applied Genomics                                                                                                                                                                                                                                                                                                                                            | Federica Cattonaro; Jasmina Vranes; Michele Morgante                                                                                                                                                                                                                                                                                                                                                                                                                                                                                                                        |
| EPI_ISL_2438635                                                                                 | "National Center of Expertise" CSEC MH RK in Karaganda region                                                                                                                                                                                                            | Reference laboratory for the control of viral infections                                                                                                                                                                                                                                                                                                                 | Aidar Ussebayev; Aknur Mutaliyeva; Andrey Komissarov; Artem Fadeev; Azamat Kenessov; Bekzhan Maikotov; Gaukhar Nussupbayeva; Madina Tieubergenova; Maria Pisareva; Nazym Tleumbetova                                                                                                                                                                                                                                                                                                                                                                                        |
| EPI_ISL_2438606                                                                                 | "National Center of Expertise" CSEC MH RK in Kyzylorda Region                                                                                                                                                                                                            | Reference laboratory for the control of viral infections                                                                                                                                                                                                                                                                                                                 | Aidar Ussebayev; Aknur Mutaliyeva; Andrey Komissarov; Artem Fadeev; Azamat Kenessov; Bekzhan Maikotov; Gaukhar Nussupbayeva; Madina Tieubergenova; Maria Pisareva; Nazym Tleumbetova                                                                                                                                                                                                                                                                                                                                                                                        |
| EPI_ISL_635059, see above                                                                       | EPI_ISL_707698, EPI_ISL_707791, EPI_ISL_733500, EPI_ISL_763067, EPI_ISL_794738, EPI_ISL_1208403<br>1-Laboratory of Microbiology, National Reference Lab, Charles Nicolle Hospital; 2-University of Tunis ElManar, Faculty of Medicine of Tunis, LR99E509, Tunis, Tunisia | 1-Clinical and Experimental Pharmacology Lab, LR16SP02, National Center of Pharmacovigilance, University of Tunis El Manar, Tunis, Tunisia. 2-Neurodegenerative diseases and psychiatric troubles, LR18SP03, Razi Hospital, University of Tunis El Manar, Tunis, Tunisia. 3- Ministry of Health, National Observatory of New and Emerging Diseases, 1006, Tunis, Tunisia | Alia Ben Kahla; Alia BenKahla; Asma Ferjani; Awatef El MOussi; Gaies Emna; Guedi Ali Barreh; Habiba Ben Romdhane; Hafsia Ladhari; Hanen El Jebari; Houssef Guedouar; Ilhem Boutba-Ben Boubaker; Ilhem Boutba-Ben Boubaker.; Imen Kacem; Imen Mkada; Ines Mdingi; Jalila Ben Khelli; Maher Kharrat; Manel Ben Sassi; Mouna Ben Sassi; Mouna Safer; Nissaf Ben Alaya; Riadh Daghfous; Riadh Gouider; Riadh Gouider.; Roua Ben Othman; Rouaa Ben Othman; Salma Abid; Sameh Trabelsi; Sana Ferjani; Sara Chammam; Sarra Chamman; Souissi Amira; Soumaya Rammeh; Zaineb Hamzaoui |
| EPI_ISL_1411583                                                                                 | 1. Główny Inspektorat Sanitarny. 2. Diagnostyka. Laboratoria Medyczne.                                                                                                                                                                                                   | 1. ViroGenetics - BSL3 Laboratory of Virology, Malopolska Centre of Biotechnology, Jagiellonian University; 2. genXone SA, Research & Development Laboratory                                                                                                                                                                                                             | Aleksandra Gidlewicz; Anna Brylak; Grzegorz Nowicki; Jakub Grabowski; Karol Szeszko; Krzysztof Pyrc; Lukasz Krych; Maciej Sykulski; Michal Kaszuba; Michal Kowalski; Natalia Drweska-Matelska; Natalia Mazur-Panasiuk; Pawel P Labaj; Piotr Szulc; Sylwia Januszczak; Tomasz Gromowski                                                                                                                                                                                                                                                                                      |
| EPI_ISL_1499330                                                                                 | 1. Główny Inspektorat Sanitarny. 2. Diagnostyka. Laboratoria Medyczne.                                                                                                                                                                                                   | 1. ViroGenetics - BSL3 Laboratory of Virology, Malopolska Centre of Biotechnology, Jagiellonian University; 2. genXone SA, Research & Development Laboratory                                                                                                                                                                                                             | Aleksandra Gidlewicz; Anna Brylak; Gromowski, T.; Grzegorz Nowicki; Jakub Grabowski; Karol Szeszko; Kowalski, M.; Labaj; Maciej Sykulski; Mazur-Panasiuk, N.; Michal Kaszuba; Natalia Drweska-Matelska; P.P.; Pyrc, K.; Sylwia Januszczak; Szulc, P.; Lukasz Krych                                                                                                                                                                                                                                                                                                          |
| EPI_ISL_1040771,<br>EPI_ISL_2140694,<br>EPI_ISL_2621134                                         | 2 Military Hospital wc MAA                                                                                                                                                                                                                                               | NHLS/UCT                                                                                                                                                                                                                                                                                                                                                                 | Arash Iranzadeh; Bruna Galvao; Carolyn Williamson; Deelan Doolabh; Diana Hardie; Gert Marais; Innocent Mudau; Kruger Marais; Lynn Tyers; Marvin Hsiao; Stephen Korsman                                                                                                                                                                                                                                                                                                                                                                                                      |
| EPI_ISL_3275166                                                                                 | AA. Rasdhoo                                                                                                                                                                                                                                                              | Indira Gandhi Memorial Hospital                                                                                                                                                                                                                                                                                                                                          | Dr. Milza Abdul Muhsin; Mr. Ibrahim Nishan Ahmed; Ms. Aishath Shuhudha; Ms. Aminath Nazfa; Ms. Fathimath Zimna                                                                                                                                                                                                                                                                                                                                                                                                                                                              |
| EPI_ISL_3347177                                                                                 | ADILAB                                                                                                                                                                                                                                                                   | Laboratorio Departamental de Salud Publica de Antioquia                                                                                                                                                                                                                                                                                                                  | Andres F. Cardona-Rios; Gloria Isabel Escobar; Idabely Betancur Ortiz; Juan P. Hernandez-Ortiz; Maria Stella López                                                                                                                                                                                                                                                                                                                                                                                                                                                          |
| EPI_ISL_2621213                                                                                 | ADILAB                                                                                                                                                                                                                                                                   | Universidad Nacional de Colombia - Laboratorio Genómico One Health                                                                                                                                                                                                                                                                                                       | Andres F. Cardona-Rios; Carlos Franco-Muñoz; Carolina Muñoz-Arango; Celeny Ortiz; Daniel O. Maldonado-Perez; Diego A. Álvarez-Díaz; Hector Alejandro Ruiz-Moreno; Idabely Betancur Ortiz; Jorge E. Osorio; Juan P. Hernandez-Ortiz; Karl A Ciuoderis; Katherine Lalton-Donato; Laura Silvana Perez; Lina M. Hurtado; Marcela Mercado-Reyes; Maria Angélica Maya; Maria Stella López; Rita Almanza Payares; Sandra Ines Cano; Simón Villegas Velásquez                                                                                                                       |
| EPI_ISL_3118670                                                                                 | AFRICA_CDC - Angola                                                                                                                                                                                                                                                      | KRISP, KZn Research Innovation and Sequencing Platform                                                                                                                                                                                                                                                                                                                   | Emmanuel SJ; Giandhari J.; Lessells R; Pillay S; Tegally H; Wilkinson E; Yajna R; de Oliveira T                                                                                                                                                                                                                                                                                                                                                                                                                                                                             |
| EPI_ISL_2617056,<br>EPI_ISL_2617092                                                             | AFRICA_CDC - Angola (Ship 12)                                                                                                                                                                                                                                            | CERI, Centre for Epidemic Response and Innoavtion, Stellenbosch University and KRISP, KZN Research Innovation and Sequencing Platform, UKZN.                                                                                                                                                                                                                             | Afonso P; David K; Emmanuel SJ; Freitas RH; Giandhari J; Inglês L; Lutucuta S; Miranda J; Morais J; Mufinda M; Naidoo Y; Neto Z; Paulo A Carralero RR Paixão JP; Pereira A; Pillay S; Tegally H; Wilkinson E; de Oliveira T                                                                                                                                                                                                                                                                                                                                                 |
| EPI_ISL_2087004                                                                                 | AMPATH LABORATORIES                                                                                                                                                                                                                                                      | National Institute for Communicable Diseases of the National Health Laboratory Service                                                                                                                                                                                                                                                                                   | Amoako DG; Bhiman JN; Ismail A; Mahlangu B; Mohale T; Ntuli N; Scheepers C                                                                                                                                                                                                                                                                                                                                                                                                                                                                                                  |
| EPI_ISL_467456,<br>EPI_ISL_467461                                                               | AMPATH-DBN                                                                                                                                                                                                                                                               | KRISP, KZN Research Innovation and Sequencing Platform                                                                                                                                                                                                                                                                                                                   | Chimukangara B; Giandhari J; Khan S; Lessells R; Mdlalose K; Pillay S; Tegally H; Wilkinson E; York D; de Oliveira T                                                                                                                                                                                                                                                                                                                                                                                                                                                        |
| EPI_ISL_2272984                                                                                 | AREA DE SALUD GOICOECHEA 2 - CLINICA DR. JIMENEZ NUÑEZ                                                                                                                                                                                                                   | Incienza, Instituto Costarricense de Investigación y Enseñanza en Nutrición y Salud                                                                                                                                                                                                                                                                                      | Adriana Godínez; Claudio Soto-Garita; Estela Cordero; Francisco Duarte; Hebleen Porras; Joselyn Prado & Juan Carlos Cartes Parra; José Luis Vargas; Mariela Gutiérrez; Melany Calderón                                                                                                                                                                                                                                                                                                                                                                                      |
| EPI_ISL_1712386                                                                                 | AREA DE SALUD OREAMUNO-PACAYAS-TIERRA BLANCA                                                                                                                                                                                                                             | Incienza, Instituto Costarricense de Investigación y Enseñanza en Nutrición y Salud                                                                                                                                                                                                                                                                                      | Adriana Godínez; Claudio Soto-Garita; Estela Cordero; Francisco Duarte; Hebleen Porras; Joselyn Prado & Carolina Loria Acosta; José Luis Vargas; Mariela Gutiérrez; Melany Calderón                                                                                                                                                                                                                                                                                                                                                                                         |
| EPI_ISL_2502750                                                                                 | AREA DE SALUD PEREZ ZELEDON                                                                                                                                                                                                                                              | Incienza, Instituto Costarricense de Investigación y Enseñanza en Nutrición y Salud                                                                                                                                                                                                                                                                                      | Adriana Godínez; Claudio Soto-Garita; Estela Cordero; Francisco Duarte; Hebleen Porras; Jose Luis Vargas; Joselyn Prado & Fabricio Aguilar; Mariela Gutierrez; Melany CalderOn                                                                                                                                                                                                                                                                                                                                                                                              |
| EPI_ISL_2658275                                                                                 | AREA DE SALUD SAN RAFAEL                                                                                                                                                                                                                                                 | Incienza, Instituto Costarricense de Investigación y Enseñanza en Nutrición y Salud                                                                                                                                                                                                                                                                                      | Adriana Godínez; Claudio Soto-Garita; Estela Cordero; Francisco Duarte; Hebleen Porras; Joselyn Prado & Javier Zárate-León; José Luis Vargas; Mariela Gutiérrez; Melany Calderón                                                                                                                                                                                                                                                                                                                                                                                            |
| EPI_ISL_1155709,<br>EPI_ISL_1155711,<br>EPI_ISL_1155713                                         | AX BIO OCEAN                                                                                                                                                                                                                                                             | CNR Virus des Infections Respiratoires - France SUD                                                                                                                                                                                                                                                                                                                      | Antonin Bal; Bruno Lina; Gregory Destras; Gwendolyne Burfin; Hadrien Regue; Laurence Josset; Martine Valette; Quentin Semanas                                                                                                                                                                                                                                                                                                                                                                                                                                               |
| EPI_ISL_1290839,<br>EPI_ISL_1290840                                                             | AXBIO                                                                                                                                                                                                                                                                    | CNR Virus des Infections Respiratoires - France SUD                                                                                                                                                                                                                                                                                                                      | Antonin Bal; Bruno Lina; Gregory Destras; Gwendolyne Burfin; Hadrien Regue; Laurence Josset; Martine Valette; Quentin Semanas                                                                                                                                                                                                                                                                                                                                                                                                                                               |
| EPI_ISL_517616                                                                                  | Academic Hospital Paramaribo                                                                                                                                                                                                                                             | Erasmus Medical Center                                                                                                                                                                                                                                                                                                                                                   | Bas Oude Munnink; Dion Gajadin; Ed Ijzerman; Emmanuelle Mungler; Gary Gummels; Ingrid Krishnadath; Lycke Woltjez; Marion Koopmans; Mireille Van de Veer; Princes Wongsowidjojo; Radjesh Ori; Rohma Banwari; Stephen Vreden                                                                                                                                                                                                                                                                                                                                                  |
| EPI_ISL_2149802                                                                                 | Aegis Sciences Corporation                                                                                                                                                                                                                                               | Centers for Disease Control and Prevention Division of Viral Diseases, Pathogen Discovery                                                                                                                                                                                                                                                                                | Adrian Paskey; Alec Vest; Benjamin Rambo-Martin; Christopher Gulvick; Clinton R. Paden; Cyndi Clark; Dakota Howard; Darlene Wagner; Dhvani Batra; Dillon Nall; Duncan MacCannell; Ethan Sanders; Holly Houdeshell; Jason Caravas; Kara Moser; Matthew Hardison; Matthew Schmeer; Ola Kvalvaag; Patrick Campbell; Peter W. Cook; Rob Case; Scott Sammons; Shatavia Morrison; Shaun Westlund; Vikramsinha Ghorpade; Yvette Unoaumhi                                                                                                                                           |
| EPI_ISL_2617060                                                                                 | Africa_CDC - Malawi P4 S2                                                                                                                                                                                                                                                | CERI, Centre for Epidemic Response and Innoavtion, Stellenbosch University and KRISP, KZN Research Innovation and Sequencing Platform, UKZN.                                                                                                                                                                                                                             | Auld A; Chilima B; Chiwaula M; Emmanuel SJ; Giandhari J; Kaba M; Kampira E; Kasambara W; Kim L; Lessells R; Maida A; Mvula B; Mwangomba W; Naidoo Y; Panja L; Pillay S; Tegally H; Wadonda N; Wilkinson E; de Oliveira T                                                                                                                                                                                                                                                                                                                                                    |
| EPI_ISL_2617046,<br>EPI_ISL_2617090                                                             | Africa_CDC - Malawi P6 S2                                                                                                                                                                                                                                                | CERI, Centre for Epidemic Response and Innoavtion, Stellenbosch University and KRISP, KZN Research Innovation and Sequencing Platform, UKZN.                                                                                                                                                                                                                             | Auld A; Chilima B; Chiwaula M; Emmanuel SJ; Giandhari J; Kaba M; Kampira E; Kasambara W; Kim L; Lessells R; Maida A; Mvula B; Mwangomba W; Naidoo Y; Panja L; Pillay S; Tegally H; Wadonda N; Wilkinson E; de Oliveira T                                                                                                                                                                                                                                                                                                                                                    |
| EPI_ISL_2360250,<br>EPI_ISL_2360251                                                             | Afzalipoor Hospital                                                                                                                                                                                                                                                      | National Influenza Center                                                                                                                                                                                                                                                                                                                                                | A Nejadi; F Ajameinjad and T Mokhtari Azad; J Yavarian; K Sadeghi; N Ghavvami; NZ Shafiei Jandaghi; V Salimi                                                                                                                                                                                                                                                                                                                                                                                                                                                                |
| EPI_ISL_3231383,<br>EPI_ISL_3231404                                                             | Airport Health Laboratory/Central Health Laboratory                                                                                                                                                                                                                      | UMR PIMIT                                                                                                                                                                                                                                                                                                                                                                | Bahador BS; David Wilkinson; Manraj SS; Patrick Mavingui; Pattoo M; Ramuth M; Sonoo J                                                                                                                                                                                                                                                                                                                                                                                                                                                                                       |
| EPI_ISL_775388,<br>EPI_ISL_775390                                                               | Akershus University Hospital, Department for Microbiology and Infectious Disease Control                                                                                                                                                                                 | Norwegian Institute of Public Health, Department of Virology                                                                                                                                                                                                                                                                                                             | Atiya R Ali; Hilde Elshaug; Hilde Vollan; Kamilla Heddeland Instefjord; Karoline Bragstad; Kathrine Stene-Johansen; Marie Paulsen Madsen; Olav Hugnnes; Rasmus Riis Kopperud                                                                                                                                                                                                                                                                                                                                                                                                |
| EPI_ISL_2164366                                                                                 | Alberta Precision Labs (APL)                                                                                                                                                                                                                                             | Public Health Agency of Canada (PHAC) National Microbiology Laboratory                                                                                                                                                                                                                                                                                                   | Buss; Croxen M; Deo A; Dieu P; E; Ferrato C; Gill K; Khan F; Koleva P; Li V; Lloyd C; Lynch T; Ma R; Murphy S; Pabbaraju K; Shokoples S; Thayer J; Tipples G; Whitehouse M; Wong A; Yu C; Zelyas N                                                                                                                                                                                                                                                                                                                                                                          |
| EPI_ISL_2375924                                                                                 | Albow Gardens Clinic wc ALB                                                                                                                                                                                                                                              | NHLS/UCT                                                                                                                                                                                                                                                                                                                                                                 | Arash Iranzadeh; Bruna Galvao; Carolyn Williamson; Deelan Doolabh; Diana Hardie; Innocent Mudau; Kruger Marais; Lynn Tyers; Marvin Hsiao; Stephen Korsman                                                                                                                                                                                                                                                                                                                                                                                                                   |
| EPI_ISL_1385811                                                                                 | Alfa Diagnostica LLC                                                                                                                                                                                                                                                     | ONCOGENE LLC                                                                                                                                                                                                                                                                                                                                                             | ONCOGENE LLC                                                                                                                                                                                                                                                                                                                                                                                                                                                                                                                                                                |
| EPI_ISL_2375992,<br>EPI_ISL_2621060                                                             | Alma CDC wc AHC                                                                                                                                                                                                                                                          | NHLS/UCT                                                                                                                                                                                                                                                                                                                                                                 | Arash Iranzadeh; Bruna Galvao; Carolyn Williamson; Deelan Doolabh; Diana Hardie; Gert Marais; Innocent Mudau; Kruger Marais; Lynn Tyers; Marvin Hsiao; Stephen Korsman                                                                                                                                                                                                                                                                                                                                                                                                      |
| EPI_ISL_2178782,<br>EPI_ISL_2178789,<br>EPI_ISL_2178792,<br>EPI_ISL_2178793,<br>EPI_ISL_2178794 | Ampath Laboratories                                                                                                                                                                                                                                                      | National Institute for Communicable Diseases of the National Health Laboratory Service                                                                                                                                                                                                                                                                                   | Amoako DG; Bhiman JN; Glass A; Gottberg A; Mahlangu B; Marshall T; Mohale T; Ntuli N; Scheepers C; Viana R                                                                                                                                                                                                                                                                                                                                                                                                                                                                  |
| EPI_ISL_3207515,<br>EPI_ISL_3207516,<br>EPI_ISL_3207520                                         | Ampath lab                                                                                                                                                                                                                                                               | NHLS/UCT                                                                                                                                                                                                                                                                                                                                                                 | Arash Iranzadeh; Bruna Galvao; Carolyn Williamson; Deelan Doolabh; Diana Hardie; Gert Marais; Innocent Mudau; Lynn Tyers; Marvin Hsiao; Rageema Joseph; Stephen Korsman                                                                                                                                                                                                                                                                                                                                                                                                     |
| EPI_ISL_527760                                                                                  | Area De Salud La Cruz                                                                                                                                                                                                                                                    | Incienza, Instituto Costarricense de Investigación y Enseñanza                                                                                                                                                                                                                                                                                                           | Adriana Godínez & Melany Calderon; Claudio Soto-Garita; Estela Cordero; Francisco Duarte; Hebleen Porras                                                                                                                                                                                                                                                                                                                                                                                                                                                                    |

| en Nutrición y Salud                                                                                                                                                                                       |                                                                                                                             |                                                                                                                                            |                                                                                                                                                                                                                                                                                                                                                                                                                                                                                                                                                                                                                                                                                                                                                                                                                                                                                                                                               |
|------------------------------------------------------------------------------------------------------------------------------------------------------------------------------------------------------------|-----------------------------------------------------------------------------------------------------------------------------|--------------------------------------------------------------------------------------------------------------------------------------------|-----------------------------------------------------------------------------------------------------------------------------------------------------------------------------------------------------------------------------------------------------------------------------------------------------------------------------------------------------------------------------------------------------------------------------------------------------------------------------------------------------------------------------------------------------------------------------------------------------------------------------------------------------------------------------------------------------------------------------------------------------------------------------------------------------------------------------------------------------------------------------------------------------------------------------------------------|
| EPI_ISL_1121974, EPI_ISL_1121975                                                                                                                                                                           | Area of Virology, Serology and Virology Division (SAVID), New South Wales Health Pathology Randwick                         | Virology Research Laboratory; Area of Virology, Serology and Virology Division (SAVID), New South Wales Health Pathology Randwick          | Au, J.; Bull, R.; Deveson, I.; Foster, C.; Rawlinson, W.; Ruiz Silva, M.; Van Hal, S.                                                                                                                                                                                                                                                                                                                                                                                                                                                                                                                                                                                                                                                                                                                                                                                                                                                         |
| EPI_ISL_3071136, EPI_ISL_3071137                                                                                                                                                                           | Armauer Hansen Research Institute                                                                                           | Armauer Hansen Research Institute                                                                                                          | Dr. Abebe Genetu Bayih; Dr. Abel Abera Negash; Dr. Adane Mihret; Dr. Alemseged Abdissa; Dr. Andargachew Mulu; Dr. Getachew Tesfaye Beyene; Dr. Markos Markos Abebe; Dr. Tesfaye Gelanew; Mr. Dawit Hailu Alemayehu; Mr. Dessalegn Abeje Tefera; Mr. Fekadu Alemu; Mr. Tamrayehu Seyoum; Mrs. Bethlehem Adnew                                                                                                                                                                                                                                                                                                                                                                                                                                                                                                                                                                                                                                  |
| EPI_ISL_1315065                                                                                                                                                                                            | Armed Forces Medical Research Laboratories and Blood Bank, Egypt                                                            | Department of Microbial Biotechnology, Genetic Engineering Division, National Research Centre                                              | Ahmed Elsayed; Ahmed Taha; Ayman Farghaly; Mohamed Khalifa; Mohamed Shemis; Reham Dawood                                                                                                                                                                                                                                                                                                                                                                                                                                                                                                                                                                                                                                                                                                                                                                                                                                                      |
| EPI_ISL_1315064                                                                                                                                                                                            | Armed Forces Medical Research Laboratories and Blood Bank, Egypt                                                            | Department of Microbial Biotechnology, Genetic Engineering Division, National Research Centre,                                             | Ahmed Elsayed; Ahmed Taha; Ayman Farghaly; Mohamed Khalifa; Mohamed Shemis; Reham Dawood                                                                                                                                                                                                                                                                                                                                                                                                                                                                                                                                                                                                                                                                                                                                                                                                                                                      |
| EPI_ISL_2423528                                                                                                                                                                                            | Atlanta VA Medical Center                                                                                                   | Genomics and Discovery, Respiratory Viruses Branch, Division of Viral Diseases, Centers for Disease Control and Prevention                 | Adam Retchless; Anna Kelleher; Anna Uehara; Brian Lynch; Clinton R. Paden; Dhvani Batra; Haibin Wang; Han Jia Justin Ng; Jasmine Padilla; Jing Zhang; Justin Lee; Krista Queen; Mark Burroughs; Mili Sheth; Morgan Davis; Peter Cook; Rachel Marine; Sarah Nobles; Suxiang Tong; Tara Coalter; Yan Li; Ying Tao                                                                                                                                                                                                                                                                                                                                                                                                                                                                                                                                                                                                                               |
| EPI_ISL_854034, EPI_ISL_1117950, EPI_ISL_2427167, EPI_ISL_2427170                                                                                                                                          | Austrian Agency for Health and Food Safety (AGES)                                                                           | Berghthaler laboratory, CeMM Research Center for Molecular Medicine of the Austrian Academy of Sciences                                    | Alexander Lercher; Alexandra Popa; Andreas Berghthaler; Anna Schedl; Bekir Erguner; Benedikt Agerer; Christoph Bock; Christoph Bock; Fabian Amman; Jakob-Wendelin Genger; Jan Laine; Lukas Endler; Maelle Le Moing; Martin Senekowitsch; Martin Senekowitsch; Michael Schuster; Michael Schuster; Petr Triska; Thomas Penz                                                                                                                                                                                                                                                                                                                                                                                                                                                                                                                                                                                                                    |
| EPI_ISL_882639                                                                                                                                                                                             | Azerbaijan National Hematology Center Division of Medical Genetics                                                          | Azerbaijan National Hematology Center Division of Medical Genetics                                                                         | Aghayev Agha Rza; Bayramli Ramin                                                                                                                                                                                                                                                                                                                                                                                                                                                                                                                                                                                                                                                                                                                                                                                                                                                                                                              |
| EPI_ISL_1110299                                                                                                                                                                                            | Azienda Sanitaria dell'Alto Adige Laboratorio Aziendale di Microbiologia e Virologia                                        | Istituto di Genomica Applicata                                                                                                             | Davide Scaglione; Eleonora Paparelli; Elisa Masi; Elisabetta Giacobazzi; Elisabetta Pagani; Gabriele Magris; Irena Jurman; Irene Bianconi; Michele Morgante; Stefanie Wieser; Vera Vendramin                                                                                                                                                                                                                                                                                                                                                                                                                                                                                                                                                                                                                                                                                                                                                  |
| EPI_ISL_2710308, EPI_ISL_2710311                                                                                                                                                                           | BARC / Lancet                                                                                                               | KRISP, KZN Research Innovation and Sequencing Platform                                                                                     | Giandhari Jennifer; Naidoo Yeshnee; Pillay Sureshnee; San James; Sisonke; Tegally Houriyah; Tshabuila Derek; Wilkinson Eduan; Yajna Ramphal; de Oliveira Tulio                                                                                                                                                                                                                                                                                                                                                                                                                                                                                                                                                                                                                                                                                                                                                                                |
| EPI_ISL_1754503, EPI_ISL_2259273, EPI_ISL_2259279                                                                                                                                                          | BIOMNIS EUROFINS IVRY                                                                                                       | Department of Virology, Henri Mondor University Hospital, Assistance Publique Hôpitaux de Paris, Université Paris-Est Créteil, INSERM U955 | Alexandre Soulier; Christophe Rodriguez; Elisabeth Trawinski; Guillaume Gricourt; Jean-Michel Pawlitsky; Melissa N'Debi; Slim Fourati; Vanessa Demontant                                                                                                                                                                                                                                                                                                                                                                                                                                                                                                                                                                                                                                                                                                                                                                                      |
| EPI_ISL_1239445, EPI_ISL_1253541, EPI_ISL_1253542, EPI_ISL_1253544, EPI_ISL_1253549, EPI_ISL_1253550, EPI_ISL_1253551, EPI_ISL_1290837, EPI_ISL_1290841, EPI_ISL_1312377, EPI_ISL_1312378, EPI_ISL_1312379 | see above                                                                                                                   | CNR Virus des Infections Respiratoires - France SUD                                                                                        | Antonin Bal; Bruno Lina; Gregory Destras; Gwendolyne Burfin; Hadrien Regue; Laurence Josset; Martine Valette; Quentin Semanas                                                                                                                                                                                                                                                                                                                                                                                                                                                                                                                                                                                                                                                                                                                                                                                                                 |
| EPI_ISL_1312372, EPI_ISL_1312373, EPI_ISL_1312374, EPI_ISL_1312375                                                                                                                                         | BIOMNIS LYON                                                                                                                | CNR Virus des Infections Respiratoires - France SUD                                                                                        | Antonin Bal; Bruno Lina; Gregory Destras; Gwendolyne Burfin; Hadrien Regue; Laurence Josset; Martine Valette; Quentin Semanas                                                                                                                                                                                                                                                                                                                                                                                                                                                                                                                                                                                                                                                                                                                                                                                                                 |
| EPI_ISL_2141965                                                                                                                                                                                            | BIOR                                                                                                                        | Latvian Biomedical Research and Study Centre                                                                                               | Daina Pule; Davids Fridmanis; Elina Dimina; Guntars Zarins; Irena Meistere; Ivars Silamikelis; Janis Klovinis; Janis Pjalkovskis; Juris Perevoscikovs; Kaspars Megnis; Laila Silamikele; Lauma Freimane; Laura Ansoone; Liga Birzniece; Monta Ustinova; Nikita Zrelous; Uga Dumpis; Uga Krumina; Vita Rovite                                                                                                                                                                                                                                                                                                                                                                                                                                                                                                                                                                                                                                  |
| EPI_ISL_1253568, EPI_ISL_1253569, EPI_ISL_1253570, EPI_ISL_1253571, EPI_ISL_1253572, EPI_ISL_1253573, EPI_ISL_1253577, EPI_ISL_1253578                                                                     | see above                                                                                                                   | CNR Virus des Infections Respiratoires - France SUD                                                                                        | Antonin Bal; Bruno Lina; Gregory Destras; Gwendolyne Burfin; Hadrien Regue; Laurence Josset; Martine Valette; Quentin Semanas                                                                                                                                                                                                                                                                                                                                                                                                                                                                                                                                                                                                                                                                                                                                                                                                                 |
| EPI_ISL_1695975, EPI_ISL_1696011, EPI_ISL_1696013, EPI_ISL_2179502                                                                                                                                         | BROUSSAIS                                                                                                                   | Department of Virology, Henri Mondor University Hospital, Assistance Publique Hôpitaux de Paris, Université Paris-Est Créteil, INSERM U955 | Alexandre Soulier; Christophe Rodriguez; Elisabeth Trawinski; Guillaume Gricourt; Jean-Michel Pawlitsky; Melissa N'Debi; Slim Fourati; Vanessa Demontant                                                                                                                                                                                                                                                                                                                                                                                                                                                                                                                                                                                                                                                                                                                                                                                      |
| EPI_ISL_859580, EPI_ISL_859646                                                                                                                                                                             | BTC, Khalifa University                                                                                                     | BTC, Khalifa University                                                                                                                    | Al Safar et al                                                                                                                                                                                                                                                                                                                                                                                                                                                                                                                                                                                                                                                                                                                                                                                                                                                                                                                                |
| EPI_ISL_2970354                                                                                                                                                                                            | Bacterial and Viral Diseases & Biotechnology and Bioinformatics, Armauer Hansen Research Institute                          | Bacterial and Viral Diseases & Biotechnology and Bioinformatics, Armauer Hansen Research Institute                                         | A.A.; A.G.; Abdissa, A.; Abebe, M.; Adnew, B.; Alemayehu; Alemu, F.; Bayih; Beyene; D.A.; D.H.; G.T.; Gelanew, T.; Mihrete, A.; Mulu, A.; Negash; Seyoum, T.; Tefera                                                                                                                                                                                                                                                                                                                                                                                                                                                                                                                                                                                                                                                                                                                                                                          |
| EPI_ISL_775599                                                                                                                                                                                             | Balai Besar Veteriner Maros                                                                                                 | National Institute of Health Research and Development                                                                                      | AA; HA; HD; Ikawati; KD; KNA; Mangidi; Muflihanah; N; Nugraha; Pangesti; Pawestri; Puspa; Puspandari; R; Setiawaty; Soekarso; Subangkit; T; V                                                                                                                                                                                                                                                                                                                                                                                                                                                                                                                                                                                                                                                                                                                                                                                                 |
| EPI_ISL_2859263                                                                                                                                                                                            | Bataan General Hospital and Medical Center                                                                                  | Philippine Genome Center                                                                                                                   | Alethea R. de Guzman; Anna Ong-Lim; Arianne A. Zamora; Benedict A. Maralit; Carlo M. Lapid; Celia Carlos; Devon Ray Pacial; Diomedes A. Carino; Edsel Maurice Salvaña; El King D. Morado; Elcid Aaron R. Pangilinan; Eva Maria Cutiongco-de la Paz; Francis A. Tablizo; Henrietta Marie Rodriguez; Jaime C. Montoya; Jan Michael C. Yap; Jarvin E. Nipales; Jo-Hannah S. Llamas; John Q. Wong; Joshua Gregor A. Dizon; Juan Antonio R. Magalang; Karol Sophia Agape R. Padilla; Kenneth M. Kim; Kris P. Punayan; Krisitna Patriz Dela Cruz; Lindsay Claire D.L. Carandang; Ma. Exanil Planting; Marc Edsel C. Ayes; Maria Rosario Singh-Vergeire and Cynthia P. Saloma; Maria Sofia L. Yangzon; Marielle M Gamboa; Marissa Alejandria; Nina Francesca Bustamante; Razel Nikka M. Hao; Renato Jacinto Q. Mantaring; Rianna Patricia S. Cruz; Sheila Mae M. Araiza; Yvonne Valerie Austria; Zipporah Mariebelle R. Enriquez; Zryel V. Mollonjon |
| EPI_ISL_2406459                                                                                                                                                                                            | Battambang Provincial Laboratory                                                                                            | Virology Unit, Institut Pasteur du Cambodge                                                                                                | Cecile Troupin; Chau Darapheak; Chin Savuth; Erik A Karlsson; Jurre Y Siegers; Kraing Sidonn; Leakhena Pum; Ly Sovann; Veasna Duong; Yi Sengdoeurm                                                                                                                                                                                                                                                                                                                                                                                                                                                                                                                                                                                                                                                                                                                                                                                            |
| EPI_ISL_780383                                                                                                                                                                                             | Bermuda Government Molecular Diagnostics Laboratory (MDL)                                                                   | Respiratory Virus Unit, National Infection Service, Public Health England                                                                  | Dr Ayoola Oyinloye (Bermuda); Dr Carika Weldon (Bermuda); PHE Covid Sequencing Team                                                                                                                                                                                                                                                                                                                                                                                                                                                                                                                                                                                                                                                                                                                                                                                                                                                           |
| EPI_ISL_2802860                                                                                                                                                                                            | BioMoLab                                                                                                                    | Microbiologia Molecular, Instituto SELADIS, Universidad Mayor de San Andrés                                                                | Aneth Vasquez Michel; Carmen Delgado Barrera; Oscar M. Rollano-Peñaloza; Sandra Miranda Sardon                                                                                                                                                                                                                                                                                                                                                                                                                                                                                                                                                                                                                                                                                                                                                                                                                                                |
| EPI_ISL_2802859                                                                                                                                                                                            | BioMoLab                                                                                                                    | Molecular Genetics Laboratory, Instituto de Investigaciones Químicas, Universidad Mayor de San Andrés                                      | Aneth Vasquez Michel; Carmen Delgado Barrera; Oscar M. Rollano-Peñaloza; Sandra Miranda Sardon                                                                                                                                                                                                                                                                                                                                                                                                                                                                                                                                                                                                                                                                                                                                                                                                                                                |
| EPI_ISL_1502575                                                                                                                                                                                            | Biochemistry and Molecular Biology Department-Faculty of Medicine, Al-Quds University                                       | Biochemistry and Molecular Biology Department-Faculty of Medicine, Al-Quds University                                                      | Al-Jawabreh, A.; Dumaldi, K.; Ereqat, S.; Naserreddin, A.                                                                                                                                                                                                                                                                                                                                                                                                                                                                                                                                                                                                                                                                                                                                                                                                                                                                                     |
| EPI_ISL_1707275, EPI_ISL_1707792, EPI_ISL_2259323                                                                                                                                                          | Biogroup Bio Lam-LCD Saint-Denis                                                                                            | Department of Virology, Henri Mondor University Hospital, Assistance Publique Hôpitaux de Paris, Université Paris-Est Créteil, INSERM U955 | Alexandre Soulier; Christophe Rodriguez; Elisabeth Trawinski; Guillaume Gricourt; Jean-Michel Pawlitsky; Melissa N'Debi; Slim Fourati; Vanessa Demontant                                                                                                                                                                                                                                                                                                                                                                                                                                                                                                                                                                                                                                                                                                                                                                                      |
| EPI_ISL_429995, EPI_ISL_430008, EPI_ISL_878571                                                                                                                                                             | Biolab Diagnostic Laboratories                                                                                              | Andersen lab at Scripps Research                                                                                                           | Ahmad Tibi; Amid Abdelnour with SEARCH Alliance San Diego; Issa Abu-Dayyeh; Lama Hussein; Lina Mohammad; Zein Naber                                                                                                                                                                                                                                                                                                                                                                                                                                                                                                                                                                                                                                                                                                                                                                                                                           |
| EPI_ISL_1406195, EPI_ISL_2105672, EPI_ISL_2105673, EPI_ISL_2105674, EPI_ISL_2658760, EPI_ISL_3149713                                                                                                       | Biolab Diagnostic Laboratories                                                                                              | Biolab Diagnostic Laboratories                                                                                                             | Ahmad Tibi; Amid Abdelnour; Badia Sadeddin; Eiad Atwa; Issa Abu-Dayyeh; Lama Hussein; Shaima Ali; Shayma Ali                                                                                                                                                                                                                                                                                                                                                                                                                                                                                                                                                                                                                                                                                                                                                                                                                                  |
| EPI_ISL_510532                                                                                                                                                                                             | Biological prevention, army                                                                                                 | Biological prevention, army                                                                                                                | A.A.; A.F.; A.M. and Soliman; Ali; Amer; B.E.; ELnabrawy; ElGohary; Elhoseiny; Elnagdy; Elnakeeb; Gad; H.A.; Harty; Hassan; Kandeil; Karam; M.A.; M.D.; M.F.; M.G.; Raouf; Seadawy; Shamel; T.A.; W.A.; Y.A.; k.E.                                                                                                                                                                                                                                                                                                                                                                                                                                                                                                                                                                                                                                                                                                                            |
| EPI_ISL_2931134, EPI_ISL_2931135                                                                                                                                                                           | Biology Department, College of Science, Al Muthanna University and Public Health Laboratory, Al-Muthanna Health Directorate | Department of Virology, Faculty of Medicine, University of Helsinki, Helsinki, Finland                                                     | Ali Jasim; Batool Kadhham Salman; Hussein Alburkat; Hussein Riadh Kitab; Murad Munah; Nihad Al-Rashedi; Olli Vapalahti; Tarja Sironen; Teemu Smura                                                                                                                                                                                                                                                                                                                                                                                                                                                                                                                                                                                                                                                                                                                                                                                            |
| EPI_ISL_1749368                                                                                                                                                                                            | Biology Lab, HIA BEGIN                                                                                                      | IRBA, 2MI                                                                                                                                  | CHAPUS C.; DEPEILLE A.; GORGE O.; GRANDPERRET V.; JARJAVAL F.; MERENS-GONTIER A.; NOLENT F.; SARILAR V.; VERGUET N.                                                                                                                                                                                                                                                                                                                                                                                                                                                                                                                                                                                                                                                                                                                                                                                                                           |
| EPI_ISL_1749312                                                                                                                                                                                            | Biology Lab, HIA LAVERAN                                                                                                    | IRBA, 2MI                                                                                                                                  | CHAPUS C.; DEPEILLE A.; FOISSAUD V.; GORGE O.; GRANDPERRET V.; JARJAVAL F.; NOLENT F.; SARILAR V.; VERGUET N.                                                                                                                                                                                                                                                                                                                                                                                                                                                                                                                                                                                                                                                                                                                                                                                                                                 |
| EPI_ISL_1015369                                                                                                                                                                                            | Biology Lab, HIA PERCY                                                                                                      | IRBA, 2MI                                                                                                                                  | FOISSAUD V.; GORGE O.; NOLENT F.; SARILAR V.                                                                                                                                                                                                                                                                                                                                                                                                                                                                                                                                                                                                                                                                                                                                                                                                                                                                                                  |
| EPI_ISL_1749369                                                                                                                                                                                            | Biology Lab, HIA ROBERT PICQUE                                                                                              | IRBA, 2MI                                                                                                                                  | CHAPUS C.; DEPEILLE A.; FILLANCO C.; GORGE O.; GRANDPERRET V.; JARJAVAL F.; NOLENT F.; SARILAR V.; VERGUET N.                                                                                                                                                                                                                                                                                                                                                                                                                                                                                                                                                                                                                                                                                                                                                                                                                                 |
| EPI_ISL_2153106                                                                                                                                                                                            | Biology, Gaziantep University                                                                                               | Biology, Gaziantep University                                                                                                              | Al-Attar; Khalilany; M.O.; M.S.; Ozaslan, M.; R.A.; Rahman                                                                                                                                                                                                                                                                                                                                                                                                                                                                                                                                                                                                                                                                                                                                                                                                                                                                                    |
| EPI_ISL_1731827                                                                                                                                                                                            | Biomedical Research Foundation of the Academy of Athens (BRFAA)                                                             | Greek Genome Center, Biomedical Research Foundation of the Academy of Athens (BRFAA)                                                       | Dimitrios Thanos; Emmanouil Athanasiadis; Ioannis Vatsellas; Katerina Zoi; Theodoros Loupis                                                                                                                                                                                                                                                                                                                                                                                                                                                                                                                                                                                                                                                                                                                                                                                                                                                   |
| EPI_ISL_2401498, EPI_ISL_2401515                                                                                                                                                                           | BioneXt Lab                                                                                                                 | Laboratoire national de sante, Microbiology, Microbial Genomics Platform                                                                   | Anke Wienecke-Baldacchino; Catherine Ragimbeau; Fatu Djabi; Jessica Tapp; Lise Pignon; Raoul Salmon; Tamir Abdelrahman; Thibault Ferrandon                                                                                                                                                                                                                                                                                                                                                                                                                                                                                                                                                                                                                                                                                                                                                                                                    |
| EPI_ISL_985062, EPI_ISL_985238                                                                                                                                                                             | Biorepository and Clinical Virology Laboratory                                                                              | Ozer Lab                                                                                                                                   | Adeola A. Fowotade; Babafemi O. Taiwo; Egon A. Ozer; Ewean C. Omoruyi; Johnson A. Adeniji; Judd F. Hultquist; Lacy M. Simons; Olubusuyi M. Adewumi; Ramon Lorenzo-Redondo                                                                                                                                                                                                                                                                                                                                                                                                                                                                                                                                                                                                                                                                                                                                                                     |
| EPI_ISL_2125904                                                                                                                                                                                            | Bioscientia MVZ Labor Karlsruhe GmbH                                                                                        | Robert Koch Institute                                                                                                                      |                                                                                                                                                                                                                                                                                                                                                                                                                                                                                                                                                                                                                                                                                                                                                                                                                                                                                                                                               |
| EPI_ISL_1534276                                                                                                                                                                                            | Bongoletu Clinic wc BLC                                                                                                     | NHLS/UCT                                                                                                                                   | Arash Iranzadeh; Bruna Galvao; Carolyn Williamson; Deelan Doolabh; Diana Hardie; Innocent Mudau; Kruger Marais; Lynn Tyers; Marvin Hsiao; Stephen Korsman                                                                                                                                                                                                                                                                                                                                                                                                                                                                                                                                                                                                                                                                                                                                                                                     |

|                                                                                                                                                                                                                                                                                                                                                                                                                                                                                                                                                             |                                                                                                                              |                                                                                                                                                                                                                                                                                                                                                                                                                  |                                                                                                                                                                                                                                                                                                                                                                                                                                                                                                                                                                                                                                                                                                                                           |
|-------------------------------------------------------------------------------------------------------------------------------------------------------------------------------------------------------------------------------------------------------------------------------------------------------------------------------------------------------------------------------------------------------------------------------------------------------------------------------------------------------------------------------------------------------------|------------------------------------------------------------------------------------------------------------------------------|------------------------------------------------------------------------------------------------------------------------------------------------------------------------------------------------------------------------------------------------------------------------------------------------------------------------------------------------------------------------------------------------------------------|-------------------------------------------------------------------------------------------------------------------------------------------------------------------------------------------------------------------------------------------------------------------------------------------------------------------------------------------------------------------------------------------------------------------------------------------------------------------------------------------------------------------------------------------------------------------------------------------------------------------------------------------------------------------------------------------------------------------------------------------|
| EPI_ISL_2360256                                                                                                                                                                                                                                                                                                                                                                                                                                                                                                                                             | Bosherh University of Medical Sciences                                                                                       | National Influenza Center                                                                                                                                                                                                                                                                                                                                                                                        | A Nejadi; F Ajamnejad; J Yavarian; K Sadeghi; N Ghavvami and T Mokhtari Azad; NZ Shafiei Jandaghi; V Salimi; Mostafa Salehi-Vaziri                                                                                                                                                                                                                                                                                                                                                                                                                                                                                                                                                                                                        |
| EPI_ISL_965178                                                                                                                                                                                                                                                                                                                                                                                                                                                                                                                                              | Botswana Harvard HIV Reference Laboratory                                                                                    | Botswana Harvard AIDS Institute Partnership                                                                                                                                                                                                                                                                                                                                                                      | Boitumelo Zuze; Botshelo Radibe; David Lawrence; Dorcas Maruapula; Joseph Makhema; Mosepele Mosepele; Roger Shapiro; Shahin Lockman; Sikhulile Moyo; Simani Gaseitsiwe; Wonderful T. Choga                                                                                                                                                                                                                                                                                                                                                                                                                                                                                                                                                |
| EPI_ISL_871872, EPI_ISL_935042, EPI_ISL_968214, EPI_ISL_1516857, EPI_ISL_1516867, EPI_ISL_1516870, EPI_ISL_2153476, EPI_ISL_2372269, EPI_ISL_2372271, EPI_ISL_2372273, EPI_ISL_2372276, EPI_ISL_2372277, EPI_ISL_2372280, EPI_ISL_2372283, EPI_ISL_2372286, EPI_ISL_2372291, EPI_ISL_2372297, EPI_ISL_2372299, EPI_ISL_2372301, EPI_ISL_2386152, EPI_ISL_2386153, EPI_ISL_2386154, EPI_ISL_2504067, EPI_ISL_2504068, EPI_ISL_2504069, EPI_ISL_2504071, EPI_ISL_2504072, EPI_ISL_2504073, EPI_ISL_2504074, EPI_ISL_2566206, EPI_ISL_2566207, EPI_ISL_2566209 | Botswana Harvard HIV Reference Laboratory                                                                                    | Boitumelo Zuze; Botshelo Radibe; David Lawrence; Dorcas Maruapula; Joseph Makhema; Keoratile Ntshambiwa; Kgomoiso Morusi; Legodile Kooepele; Madisa Mine; Makhema; Modisa Motswaledi; Mosepele Mosepele; Ontlametse T. Bareng; Pamela Smith-Lawrence; Roger Shapiro; Joseph Lockman; Sikhulile Dorcas Maruapula; Sikhulile Moyo; Simani Gaseitsiwe; Thongbotho Mphoyakulose; Wonderful Choga; Wonderful T. Choga |                                                                                                                                                                                                                                                                                                                                                                                                                                                                                                                                                                                                                                                                                                                                           |
| see above                                                                                                                                                                                                                                                                                                                                                                                                                                                                                                                                                   | Botswana Harvard HIV Reference Laboratory                                                                                    | Botswana Harvard HIV Reference Laboratory                                                                                                                                                                                                                                                                                                                                                                        | Boitumelo Zuze; Botshelo Radibe; David Lawrence; Dorcas Maruapula; Joseph Makhema; Keoratile Ntshambiwa; Kgomoiso Morusi; Legodile Kooepele; Madisa Mine; Makhema; Modisa Motswaledi; Mosepele Mosepele; Ontlametse T. Bareng; Pamela Smith-Lawrence; Roger Shapiro; Joseph Lockman; Sikhulile Dorcas Maruapula; Sikhulile Moyo; Simani Gaseitsiwe; Thongbotho Mphoyakulose; Wonderful Choga; Wonderful T. Choga                                                                                                                                                                                                                                                                                                                          |
| EPI_ISL_2547410                                                                                                                                                                                                                                                                                                                                                                                                                                                                                                                                             | Brandwacht Sat Clinic wv BBC                                                                                                 | National Health Laboratory Service/University of Cape Town (NHL/UCT)                                                                                                                                                                                                                                                                                                                                             | Arash Iranzadeh; Bruna Galvao; Carolyn Williamson; Deelan Doolabh; Diana Hardie; Gert Marais; Innocent Mudau; Lynn Tyers; Marvin Hsiao; Stephen Korsman                                                                                                                                                                                                                                                                                                                                                                                                                                                                                                                                                                                   |
| EPI_ISL_1001001, EPI_ISL_1001003                                                                                                                                                                                                                                                                                                                                                                                                                                                                                                                            | Bundeswehr Institute of Microbiology                                                                                         | Bundeswehr Institute of Microbiology                                                                                                                                                                                                                                                                                                                                                                             | Alexandra Rehn; Enrico Georgi; Malena Bestehorn-Willmann; Markus Antwerpen; Mathias Walter; Roman Wölfel; Sabine Zange                                                                                                                                                                                                                                                                                                                                                                                                                                                                                                                                                                                                                    |
| EPI_ISL_1364993, EPI_ISL_1364994                                                                                                                                                                                                                                                                                                                                                                                                                                                                                                                            | Bundeswehrkrankenhaus Hamburg                                                                                                | Bundeswehr Institute of Microbiology                                                                                                                                                                                                                                                                                                                                                                             | Alexandra Rehn; Enrico Georgi; Malena Bestehorn-Willmann; Markus Antwerpen; Mathias Walter; Mike Pillukat; Roman Wölfel; Sabine Zange                                                                                                                                                                                                                                                                                                                                                                                                                                                                                                                                                                                                     |
| EPI_ISL_1364949, EPI_ISL_1364962, EPI_ISL_1364968, EPI_ISL_1364969                                                                                                                                                                                                                                                                                                                                                                                                                                                                                          | Bundeswehrzentrankrankenhaus Koblenz                                                                                         | Bundeswehr Institute of Microbiology                                                                                                                                                                                                                                                                                                                                                                             | Alexandra Rehn; Enrico Georgi; Malena Bestehorn-Willmann; Markus Antwerpen; Mathias Walter; Mike Pillukat; Roman Wölfel; Sabine Zange                                                                                                                                                                                                                                                                                                                                                                                                                                                                                                                                                                                                     |
| EPI_ISL_2779345                                                                                                                                                                                                                                                                                                                                                                                                                                                                                                                                             | Bungoma County Referral Hospital                                                                                             | USAMRD-A, Basic Science Laboratory                                                                                                                                                                                                                                                                                                                                                                               | Alan Lemtudo; Beth Mutai; Brian Andika; Carol Kifude; Clement Masakwe; Eric Muthanje; Esther Omuseini; Faith Sigei; Gathii Kimita; George Awinda; John Waitumbi; Josphat Nyataya; Rachel Githii; Rehema Liyai; Stephen Ochola                                                                                                                                                                                                                                                                                                                                                                                                                                                                                                             |
| EPI_ISL_2558062                                                                                                                                                                                                                                                                                                                                                                                                                                                                                                                                             | Bureau Of Quarantine (BOQ)                                                                                                   | Philippine Genome Center                                                                                                                                                                                                                                                                                                                                                                                         | Alethea R. de Guzman; Anna Ong-Lim; Arianne A. Zamora; Asia Louisa U. Chong; Benedict A. Maralit; Candice Francheska B. Tambaon; Carlo M. Lapid; Celia Carlos; Devon Ray Pacial; Edsel Maurice Salvaña; El King D. Morado; Elcid Aaron R. Panglilan; Eva Maria Cutiongco-de la Paz; Francis A. Tabizo; Irish Coleen A. Asin; Jaime C. Montoya; Jan Michael C. Yap; Jo-Hannah S. Llamas; John Q. Wong; Joshua Gregor A. Dizon; Juan Antonio R. Magalana; Karol Sophia Agape R. Padilla; Kenneth M. Kim; Kris P. Punayan; Marc Edsel C. Ayes; Maria Rosario Singh-Vergeire and Cynthia P. Saloma; Maria Sofia L. Yangzon; Marissa Alejandra; Razel Nikka M. Hao; Renato Jacinto Q. Mantaring; Rianna Patricia S. Cruz; Sheila Mae M. Araiza |
| EPI_ISL_2779387, EPI_ISL_2779396, EPI_ISL_3031380                                                                                                                                                                                                                                                                                                                                                                                                                                                                                                           | Busia County Referral Hospital                                                                                               | USAMRD-A, Basic Science Laboratory                                                                                                                                                                                                                                                                                                                                                                               | Alan Lemtudo; Beth Mutai; Brian Andika; Carol Kifude; Clement Masakwe; Eric Muthanje; Esther Omuseini; Faith Sigei; Gathii Kimita; George Awinda; John Waitumbi; Josphat Nyataya; Rachel Githii; Rehema Liyai; Stephen Ochola                                                                                                                                                                                                                                                                                                                                                                                                                                                                                                             |
| EPI_ISL_2779289                                                                                                                                                                                                                                                                                                                                                                                                                                                                                                                                             | Busia border point                                                                                                           | USAMRD-A, Basic Science Laboratory                                                                                                                                                                                                                                                                                                                                                                               | Alan Lemtudo; Beth Mutai; Brian Andika; Carol Kifude; Clement Masakwe; Eric Muthanje; Esther Omuseini; Faith Sigei; Gathii Kimita; George Awinda; John Waitumbi; Josphat Nyataya; Rachel Githii; Rehema Liyai; Stephen Ochola                                                                                                                                                                                                                                                                                                                                                                                                                                                                                                             |
| EPI_ISL_1371903                                                                                                                                                                                                                                                                                                                                                                                                                                                                                                                                             | C H DE LA POLYNESIE FRANCAISE                                                                                                | CNR Virus des Infections Respiratoires - France SUD                                                                                                                                                                                                                                                                                                                                                              | Antonin Bal; Bruno Lina; Gregory Destras; Gwendolyne Burfin; Hadrien Regue; Laurence Josset; Martine Valette; Quentin Semanas                                                                                                                                                                                                                                                                                                                                                                                                                                                                                                                                                                                                             |
| EPI_ISL_1706829, EPI_ISL_1706830, EPI_ISL_1706832, EPI_ISL_1706833, EPI_ISL_1706835                                                                                                                                                                                                                                                                                                                                                                                                                                                                         | C.H.C.B KERIO                                                                                                                | Department of Virology, Henri Mondor University Hospital, Assistance Publique Hôpitaux de Paris, Université Paris-Est Créteil, INSERM U955                                                                                                                                                                                                                                                                       | Alexandre Soulier; Christophe Rodriguez; Elisabeth Trawinski; Guillaume Gricourt; Jean-Michel Pawlotsky; Melissa N'Debi; Slim Fourati; Vanessa Demontant                                                                                                                                                                                                                                                                                                                                                                                                                                                                                                                                                                                  |
| EPI_ISL_1287759                                                                                                                                                                                                                                                                                                                                                                                                                                                                                                                                             | CDP HUSSEL VIENNE                                                                                                            | CNR Virus des Infections Respiratoires - France SUD                                                                                                                                                                                                                                                                                                                                                              | Antonin Bal; Bruno Lina; Gregory Destras; Gwendolyne Burfin; Hadrien Regue; Laurence Josset; Martine Valette; Quentin Semanas                                                                                                                                                                                                                                                                                                                                                                                                                                                                                                                                                                                                             |
| EPI_ISL_605780                                                                                                                                                                                                                                                                                                                                                                                                                                                                                                                                              | CEIRS Data Processing and Coordinating Center, St. Jude Center of Excellence for Influenza Research and Surveillance (CEIRS) | CEIRS Data Processing and Coordinating Center, St. Jude Center of Excellence for Influenza Research and Surveillance (CEIRS)                                                                                                                                                                                                                                                                                     | A.E.; Ali; El-Guindy; El-Sayes, M.; El-Shesheny, R.; El-Taweel, A.; Gomaa, M.; Kamel; Kandeil, A.; Kayali, G.; Kayed; Kutkat, O.; M.A.; M.N.; Mahmoud; Mahrous, N.; Moatasim, Y.; Mostafa, A.; N.M.; Naguib, A.; Roshdy; S.H.; Shehata, M.; Showky, S.; W.H.; Webby, R.                                                                                                                                                                                                                                                                                                                                                                                                                                                                   |
| EPI_ISL_1287752                                                                                                                                                                                                                                                                                                                                                                                                                                                                                                                                             | CERBALLIANCE PACA                                                                                                            | CNR Virus des Infections Respiratoires - France SUD                                                                                                                                                                                                                                                                                                                                                              | Antonin Bal; Bruno Lina; Gregory Destras; Gwendolyne Burfin; Hadrien Regue; Laurence Josset; Martine Valette; Quentin Semanas                                                                                                                                                                                                                                                                                                                                                                                                                                                                                                                                                                                                             |
| EPI_ISL_1313012, EPI_ISL_1313014                                                                                                                                                                                                                                                                                                                                                                                                                                                                                                                            | CERBALLIANCE RHONE ALPES                                                                                                     | CNR Virus des Infections Respiratoires - France SUD                                                                                                                                                                                                                                                                                                                                                              | Antonin Bal; Bruno Lina; Gregory Destras; Gwendolyne Burfin; Hadrien Regue; Laurence Josset; Martine Valette; Quentin Semanas                                                                                                                                                                                                                                                                                                                                                                                                                                                                                                                                                                                                             |
| EPI_ISL_1910917                                                                                                                                                                                                                                                                                                                                                                                                                                                                                                                                             | CH Bethune                                                                                                                   | CHU Lille                                                                                                                                                                                                                                                                                                                                                                                                        | AIT YAHYA Emilie; ALIDJINOU Enagnon Kazali; BOCKET Laurence; CREPIN Michel; DEMAY Christophe; ENGELMANN Iika; GEFFROY Sandrine; GUIGON Aurélie; LAMBERT Valérie; LAZREK Mouna; NOBILLIAUX Florian; PREVOST Brigitte; THULLIER Caroline; TINEZ Claire                                                                                                                                                                                                                                                                                                                                                                                                                                                                                      |
| EPI_ISL_1671818                                                                                                                                                                                                                                                                                                                                                                                                                                                                                                                                             | CH Bethune                                                                                                                   | CHU Lille - Laboratoire de Virologie                                                                                                                                                                                                                                                                                                                                                                             | AIT YAHYA Emilie; ALIDJINOU Enagnon Kazali; BOCKET Laurence; CREPIN Michel; DEMAY Christophe; ENGELMANN Iika; GEFFROY Sandrine; GUIGON Aurélie; LAMBERT Valérie; LAZREK Mouna; NOBILLIAUX Florian; PREVOST Brigitte; THULLIER Caroline; TINEZ Claire                                                                                                                                                                                                                                                                                                                                                                                                                                                                                      |
| EPI_ISL_1448016                                                                                                                                                                                                                                                                                                                                                                                                                                                                                                                                             | CH MAUBEUGE                                                                                                                  | CHU Lille - Laboratoire de Virologie                                                                                                                                                                                                                                                                                                                                                                             | AIT YAHYA Emilie; ALIDJINOU Enagnon Kazali; BOCKET Laurence; CREPIN Michel; DEMAY Christophe; ENGELMANN Iika; GEFFROY Sandrine; GUIGON Aurélie; LAMBERT Valérie; LAZREK Mouna; NOBILLIAUX Florian; PREVOST Brigitte; TCHANTCHOU NJOSE YANICK; THULLIER Caroline; TINEZ Claire                                                                                                                                                                                                                                                                                                                                                                                                                                                             |
| EPI_ISL_2562031, EPI_ISL_2562045                                                                                                                                                                                                                                                                                                                                                                                                                                                                                                                            | CH Princesse Grace                                                                                                           | Cerba lab                                                                                                                                                                                                                                                                                                                                                                                                        | Aude Lessenne; Bénédicte Roquebert; Emmanuel Lecorche; Kader Merah; Laura Verdurme; Patrice Herisson; Sabine Trombert-Paolantoni; Stéphanie Haïm-Boukobza; Thierry Collin                                                                                                                                                                                                                                                                                                                                                                                                                                                                                                                                                                 |
| EPI_ISL_1707498                                                                                                                                                                                                                                                                                                                                                                                                                                                                                                                                             | CH VALENCE                                                                                                                   | CNR Virus des Infections Respiratoires - France SUD                                                                                                                                                                                                                                                                                                                                                              | Antonin Bal; Bruno Lina; Gregory Destras; Gwendolyne Burfin; Hadrien Regue; Laurence Josset; Martine Valette; Quentin Semanas                                                                                                                                                                                                                                                                                                                                                                                                                                                                                                                                                                                                             |
| EPI_ISL_894220, EPI_ISL_894221, EPI_ISL_894222, EPI_ISL_894226, EPI_ISL_894227, EPI_ISL_894228, EPI_ISL_894229, EPI_ISL_912403                                                                                                                                                                                                                                                                                                                                                                                                                              | CH de Mayotte - Laboratoire de Biologie                                                                                      | National Reference Center for Viruses of Respiratory Infections, Institut Pasteur, Paris                                                                                                                                                                                                                                                                                                                         | Angela Brisebarre; Camille Capel; Combe Patrice; Etienne Simon-Lorière; Marion Barbet; Maud Vanpeene; Méline Bizard; Sylvie Behillil; Sylvie van der Werf; Vincent Enouf                                                                                                                                                                                                                                                                                                                                                                                                                                                                                                                                                                  |
| EPI_ISL_1672661, EPI_ISL_2333978                                                                                                                                                                                                                                                                                                                                                                                                                                                                                                                            | CH.INTERCOMMUNAL DE CRETEIL                                                                                                  | Department of Virology, Henri Mondor University Hospital, Assistance Publique Hôpitaux de Paris, Université Paris-Est Créteil, INSERM U955                                                                                                                                                                                                                                                                       | Alexandre Soulier; Christophe Rodriguez; Elisabeth Trawinski; Guillaume Gricourt; Jean-Michel Pawlotsky; Melissa N'Debi; Slim Fourati; Vanessa Demontant                                                                                                                                                                                                                                                                                                                                                                                                                                                                                                                                                                                  |
| EPI_ISL_2004292                                                                                                                                                                                                                                                                                                                                                                                                                                                                                                                                             | CHLC                                                                                                                         | Instituto Nacional de Saude (INSA)                                                                                                                                                                                                                                                                                                                                                                               | Borges et al                                                                                                                                                                                                                                                                                                                                                                                                                                                                                                                                                                                                                                                                                                                              |
| EPI_ISL_2273012, EPI_ISL_2273037, EPI_ISL_2273053, EPI_ISL_2382226, EPI_ISL_2382228, EPI_ISL_2382230, EPI_ISL_2382236, EPI_ISL_2382237, EPI_ISL_2382249, EPI_ISL_2382258, EPI_ISL_2382692, EPI_ISL_2454653, EPI_ISL_2454656, EPI_ISL_2582812, EPI_ISL_2662643, EPI_ISL_2662650, EPI_ISL_2662656, EPI_ISL_3024680                                                                                                                                                                                                                                            | CHRIS HANI BARAGWANATH LABORATORY                                                                                            | National Institute for Communicable Diseases of the National Health Laboratory Service                                                                                                                                                                                                                                                                                                                           | Amoako DG; Bhiman JN; Everatt J; Ismail A; Mahlangu B; Mnguni A; Mohale T; Ntuli N; Scheepers C                                                                                                                                                                                                                                                                                                                                                                                                                                                                                                                                                                                                                                           |
| EPI_ISL_660356                                                                                                                                                                                                                                                                                                                                                                                                                                                                                                                                              | CHU Clermont-Ferrand                                                                                                         | CNR Virus des Infections Respiratoires - France SUD                                                                                                                                                                                                                                                                                                                                                              | Amélie Brebion; Antonin Bal; Audrey Mirand; Bruno Lina; Christel Regagnon; Christine Archimbaud; Cécile Henquell; Gregory Destras; Gwendolyne Burfin; Hadrien Règue; Hélène Chabrolles; Laurence Josset; Martine Chambon; Martine Valette; Maxime Bisseux; Patricia Combes; Quentin Semanas                                                                                                                                                                                                                                                                                                                                                                                                                                               |
| EPI_ISL_1425079, EPI_ISL_1448425                                                                                                                                                                                                                                                                                                                                                                                                                                                                                                                            | CHU Purpan - Laboratoire de Virologie - Institut Fédératif de Biologie                                                       | CHU Purpan - Laboratoire de Virologie - Institut Fédératif de Biologie                                                                                                                                                                                                                                                                                                                                           | Agnès Harter; Jacques Izopet; Justine Latour; Martine Dubois; Nicolas Jeanne; Noémie Ranger; Pauline Boyer; Pauline Tremeaux; Romain Carcenac                                                                                                                                                                                                                                                                                                                                                                                                                                                                                                                                                                                             |
| EPI_ISL_1290836                                                                                                                                                                                                                                                                                                                                                                                                                                                                                                                                             | CHU Rennes                                                                                                                   | CNR Virus des Infections Respiratoires - France SUD                                                                                                                                                                                                                                                                                                                                                              | Antonin Bal; Bruno Lina; Gregory Destras; Gwendolyne Burfin; Hadrien Regue; Laurence Josset; Martine Valette; Quentin Semanas                                                                                                                                                                                                                                                                                                                                                                                                                                                                                                                                                                                                             |
| EPI_ISL_1313709, EPI_ISL_1707485                                                                                                                                                                                                                                                                                                                                                                                                                                                                                                                            | CHU ST ETIENNE HOPITAL NORD                                                                                                  | CNR Virus des Infections Respiratoires - France SUD                                                                                                                                                                                                                                                                                                                                                              | Antonin Bal; Bruno Lina; Gregory Destras; Gwendolyne Burfin; Hadrien Regue; Laurence Josset; Martine Valette; Quentin Semanas                                                                                                                                                                                                                                                                                                                                                                                                                                                                                                                                                                                                             |
| EPI_ISL_660670                                                                                                                                                                                                                                                                                                                                                                                                                                                                                                                                              | CHU Toulouse                                                                                                                 | CNR Virus des Infections Respiratoires - France SUD                                                                                                                                                                                                                                                                                                                                                              | Antonin Bal; Bruno Lina; Gregory Destras; Gwendolyne Burfin; Hadrien Règue; Jean Michel Mansuy; Laurence Josset; Martine Valette; Quentin Semanas                                                                                                                                                                                                                                                                                                                                                                                                                                                                                                                                                                                         |
| EPI_ISL_1370388, EPI_ISL_1370392                                                                                                                                                                                                                                                                                                                                                                                                                                                                                                                            | CHUV                                                                                                                         | Laboratory of genomics and metagenomics, Institute of Microbiology, University Hospital Centre and University of Lausanne, Switzerland                                                                                                                                                                                                                                                                           | Claire Bertelli; Damien Jacot; Gilbert Greub; Sébastien Aeb; Trestan Pilonel                                                                                                                                                                                                                                                                                                                                                                                                                                                                                                                                                                                                                                                              |
| EPI_ISL_683835                                                                                                                                                                                                                                                                                                                                                                                                                                                                                                                                              | CICM                                                                                                                         | Malaria Research and Training Center (MRTC-Parasite)                                                                                                                                                                                                                                                                                                                                                             | Abdoulaye Djimde; Antoine Dara                                                                                                                                                                                                                                                                                                                                                                                                                                                                                                                                                                                                                                                                                                            |
| EPI_ISL_2682597                                                                                                                                                                                                                                                                                                                                                                                                                                                                                                                                             | CICM, Bamako                                                                                                                 | Malaria Research and Training Center-Bamako                                                                                                                                                                                                                                                                                                                                                                      | Abdoul Karim Sangare; Abdoulaye Djimde; Amadou Daou; Antoine Dara; Boureima Kouriba                                                                                                                                                                                                                                                                                                                                                                                                                                                                                                                                                                                                                                                       |
| EPI_ISL_487446                                                                                                                                                                                                                                                                                                                                                                                                                                                                                                                                              | CICM-Mali                                                                                                                    | Bundeswehr Institut of Microbiology                                                                                                                                                                                                                                                                                                                                                                              | Antwerpen; Bestehorn-Willmann; Dür; Heitzer; Kouriba; Maiga; Quedraogo; Rehn; Sangaré; Sogodogo; Traoré; Walter; Wölfel; Zimmermann                                                                                                                                                                                                                                                                                                                                                                                                                                                                                                                                                                                                       |
| EPI_ISL_1299497, EPI_ISL_1591100                                                                                                                                                                                                                                                                                                                                                                                                                                                                                                                            | CMA Dano                                                                                                                     | Centre Muraz                                                                                                                                                                                                                                                                                                                                                                                                     | Abdoul-Salam Ouedraogo; Ange Badjo; Armel Poda; Arsène Somé; Arsène Zongo; Essia Belarbi; Fabian Leendertz; Firmin Kaboré; Grit Schubert; Jasmin Schlötterbeck; Soumeiya Ouangraoua; Thérèse Kagone; Yacouba Sawadogo                                                                                                                                                                                                                                                                                                                                                                                                                                                                                                                     |
| EPI_ISL_1239446, EPI_ISL_1253567, EPI_ISL_1312825, EPI_ISL_1313667, EPI_ISL_1313693, EPI_ISL_1314016, EPI_ISL_1707523, EPI_ISL_1707526, EPI_ISL_1707528, EPI_ISL_1707535, EPI_ISL_1707536, EPI_ISL_1707537                                                                                                                                                                                                                                                                                                                                                  | CNR Virus des Infections Respiratoires - France SUD                                                                          | CNR Virus des Infections Respiratoires - France SUD                                                                                                                                                                                                                                                                                                                                                              | Antonin Bal; Bruno Lina; Gregory Destras; Gwendolyne Burfin; Hadrien Regue; Laurence Josset; Martine Valette; Quentin Semanas                                                                                                                                                                                                                                                                                                                                                                                                                                                                                                                                                                                                             |
| EPI_ISL_450841                                                                                                                                                                                                                                                                                                                                                                                                                                                                                                                                              | COVID-19 Laboratory                                                                                                          | DNA Solution Ltd                                                                                                                                                                                                                                                                                                                                                                                                 | ABM Khademul Islam; AHM Nurun Nabi; Abu Sufian; Gazi Nurun Nahar; Habibul Bari Shozib; Haseena Khan; Imran Khan; Latiful Bari; M Anwar Hossain.; MA Malek; Mamun Ahmed; Md Imdadul Hoque; Md Ismail Hosen; Md Mizanur Rahman; Mohammad Riazul Islam; Nazmul Ahsan; Richard Malo; Sabita Rezwana Rahman; Sabrina Moriom Elius; Shahryar Nabi; Sharif Akhteruzzaman; Zeba Islam Seraj                                                                                                                                                                                                                                                                                                                                                       |
| EPI_ISL_450840                                                                                                                                                                                                                                                                                                                                                                                                                                                                                                                                              | COVID-19 Laboratory                                                                                                          | DNA Solution Ltd. L-5                                                                                                                                                                                                                                                                                                                                                                                            | ABM Khademul Islam; AHM Nurun Nabi; Abu Sufian; Gazi Nurun Nahar; Habibul Bari Shozib; Haseena Khan; Imran Khan; Latiful Bari; M Anwar Hossain.; MA Malek; Mamun Ahmed; Md Imdadul Hoque; Md Ismail Hosen; Md Mizanur Rahman; Mohammad Riazul Islam; Nazmul Ahsan; Richard Malo; Sabita Rezwana Rahman; Sabrina Moriom Elius; Shahryar Nabi; Sharif Akhteruzzaman; Zeba Islam Seraj                                                                                                                                                                                                                                                                                                                                                       |
| EPI_ISL_2227271                                                                                                                                                                                                                                                                                                                                                                                                                                                                                                                                             | COVID-19 National Reference Laboratory, Pasteur Institute of Iran.                                                           | Genetics Research Center, University of Social Welfare and Rehabilitation Sciences                                                                                                                                                                                                                                                                                                                               | Hossein Najmabadi.; Kimia Kahrizi; Mahsa Tavakoli; Marzieh Mohseni; Mohammad Hassan Pouriayevali; Mostafa Salehi-Vaziri; Tahmineh Jalali; Zohreh Fattahi                                                                                                                                                                                                                                                                                                                                                                                                                                                                                                                                                                                  |
| EPI_ISL_3274158, EPI_ISL_3274163, EPI_ISL_3274164                                                                                                                                                                                                                                                                                                                                                                                                                                                                                                           | CPHL/MOH/EGYPT                                                                                                               | CPHL/MOH/EGYPT                                                                                                                                                                                                                                                                                                                                                                                                   | Wael H. Roshdy/ Mohamed Kamal / Shymaa s. Ahmed/ Ramy Galal/Nancy el guindy/ Amel naguib/yasser el hady/salma sayed/ Abd Monaem Adel/Galal Mahmoud/Dalia Ramadan/Rabeh .R. El/Shesheny/ Mohamed A Ali/Mohamed Hassany; Wael H. Roshdy/ Mohamed Kamal / Shymaa s. Ahmed/ Ramy Galal/Nancy el guindy/ Amelia naguib/salma sayed/ Abd Monaem Adel/Galal Mahmoud/Dalia Ramadan/Rabeh .R. El/Shesheny/ Mohamed A Ali/Mohamed Hassany                                                                                                                                                                                                                                                                                                           |
| EPI_ISL_1190754                                                                                                                                                                                                                                                                                                                                                                                                                                                                                                                                             | CREMER(Centre de Rechercherches sur les Maladies Emergentes et Ré-émergentes)                                                | TransVIHM(Recherches Translationnelles sur le VIH et les Maladies Infectieuses)                                                                                                                                                                                                                                                                                                                                  | Ahidjo Ayoub; Celestin Godwe; Christelle Butel; Dowbiss Meta Djoms; Eitel Mpoudi Ngole; Eric Delaporte; Esemu Livo; Laetitia Serrano; Marcel Tongo; Marie Amougou; Martin Maidadi Foudi; Martine Peeters; Nicole Vidal; Rodrigue Kamga                                                                                                                                                                                                                                                                                                                                                                                                                                                                                                    |
| EPI_ISL_636980                                                                                                                                                                                                                                                                                                                                                                                                                                                                                                                                              | CS Xai Xai                                                                                                                   | KRISP, KZN Research Innovation and Sequencing Platform                                                                                                                                                                                                                                                                                                                                                           | Gianchari J; Ismael N; Nadia Siteo; Nedio Mabunda; Paulo Arnaldo; Pillay S; Tegally H; Wilkinson E; de Oliveira T                                                                                                                                                                                                                                                                                                                                                                                                                                                                                                                                                                                                                         |

|                                                                                                                                                                                                                                                                                                                                                                                                                                                                                            |                                                                                                                       |                                                                                                                                                                |                                                                                                                                                                                                                                                                                                                                                                                                                                                                                                                                                                                                         |
|--------------------------------------------------------------------------------------------------------------------------------------------------------------------------------------------------------------------------------------------------------------------------------------------------------------------------------------------------------------------------------------------------------------------------------------------------------------------------------------------|-----------------------------------------------------------------------------------------------------------------------|----------------------------------------------------------------------------------------------------------------------------------------------------------------|---------------------------------------------------------------------------------------------------------------------------------------------------------------------------------------------------------------------------------------------------------------------------------------------------------------------------------------------------------------------------------------------------------------------------------------------------------------------------------------------------------------------------------------------------------------------------------------------------------|
| EPI_ISL_910038                                                                                                                                                                                                                                                                                                                                                                                                                                                                             | CSIR-Centre for Cellular and Molecular Biology                                                                        | CSIR-Centre for Cellular and Molecular Biology                                                                                                                 | Archana Bharadwaj Siva; B Himasri; Blessy B John; Divya Tej Sowpati; Karthik Bharadwaj Tallapaka; Lamuk Zaveri; Namami Gaur; Payel Mukherjee; Pratheusa Maccha; Priya Singh; Purushotham Vodnala; Rakesh K Mishra; Sofia Banu; Tulasi Nagabandi; Viswagithe S L                                                                                                                                                                                                                                                                                                                                         |
| EPI_ISL_2754313                                                                                                                                                                                                                                                                                                                                                                                                                                                                            | CURE                                                                                                                  | Institut Pasteur de Montevideo                                                                                                                                 | Andres Lizasoain; Belén González; Cecilia Alonso; Daiana Mir; Emiliano Pereira; Gonzalo Bello; Ighor Arantes; Juan Zanetti; Lucia Bilbao; Luciana Grifero; Lucia Spangenberg; Mailen Arleo; Mariana Brandes; María José Benitez-Galeano; Matias Castells; Matias Salvo; Matias Victoria; Mauricio Méndez; Melissa Duquia; Natalia Reyes; Odnille Chappos; Pablo Smircich; Pia Techera; Rodney Colina; Tamara Fernández-Calero; Tania Possi; Verónica Noya                                                                                                                                               |
| EPI_ISL_2547362                                                                                                                                                                                                                                                                                                                                                                                                                                                                            | Calvinia RSC Clinic                                                                                                   | National Health Laboratory Service/University of Cape Town (NHLS/UCT)                                                                                          | Arash Iranzadeh; Bruna Galvao; Carolyn Williamson; Deelan Doolabh; Diana Hardie; Gert Marais; Innocent Mudau; Lynn Tyers; Marvin Hsiao; Stephen Korsman                                                                                                                                                                                                                                                                                                                                                                                                                                                 |
| EPI_ISL_1096139, EPI_ISL_1096140                                                                                                                                                                                                                                                                                                                                                                                                                                                           | Cambodian National Public Health Laboratory, National Institute of Public Health                                      | Virology Unit, Institut Pasteur du Cambodge                                                                                                                    | Chau Darapeak; Chin Savuth; Erik A Karlsson; Kraing Sidonn; Ly Sovann; Sokhoum Yann; Veasna Duong; Yi Sengdoeurn                                                                                                                                                                                                                                                                                                                                                                                                                                                                                        |
| EPI_ISL_862797                                                                                                                                                                                                                                                                                                                                                                                                                                                                             | Cancer Biology Department, National Cancer Institute                                                                  | Cancer Biology Department, National Cancer Institute                                                                                                           | A.A.; A.E.; A.N.; Abouelhoda, M.; Ahmed; Bahnassy; Elhosieny; F.W.; Gad; H.K.; Hafez; Hamdy; M.G.; M.M.; M.S.; O.S.; Sedawy; Soliman; Soliman, L.; Zekri                                                                                                                                                                                                                                                                                                                                                                                                                                                |
| EPI_ISL_622786                                                                                                                                                                                                                                                                                                                                                                                                                                                                             | Canterbury Health Laboratories                                                                                        | Institute of Environmental Science and Research (ESR)                                                                                                          | Anja Werno; Antje van der Linden; Arlo Upton; Chris Mansell; David Hammer; Dragana Drinkovic; Erasmus Smit; Gary McAuliffe; Hana Sofia Andersson; Hermes Perez; James Ussher; Jill Sherwood; Jing Wang; Joep de Ligt; Josh Freeman; Julia Howard; Juliet Elvy; Lauren Jelly; Mary DeAlmeida; Matt Blakiston; Matt Storey; Matthew Rogers; Max Bloomfield; Michael Addide; Michelle Balm; Muhammad Faisal; Nikki Freed; Olin Silander; Sally Roberts; Sarah Jefferies; Sharmini Muttaiyah; Susan Morpeth; Susan Taylor; Timothy Blackmore; Vani Sathyendran; Veronica Playle; Virginia Hope; Xiaoyun Ren |
| EPI_ISL_811127                                                                                                                                                                                                                                                                                                                                                                                                                                                                             | Cantonal Hospital Winterthur                                                                                          | Institute of Medical Virology, University of Zurich                                                                                                            | Alexander Wepf; Alexandra Trkola; Annette Audigé; Cyril Shah; Guido Bloemberg; Jon Huder; Jürg Böni; Kevin Steiner; Maria Grünberg; Maryam Zaheer; Michael Huber; Riccarda Capaul; Stefan Schmutz; Urs Karrer; Verena Kufner                                                                                                                                                                                                                                                                                                                                                                            |
| EPI_ISL_977656                                                                                                                                                                                                                                                                                                                                                                                                                                                                             | Caribbean Public Health Agency                                                                                        | Carrington Lab, Department of PreClinical Sciences, Building 36, First Floor Biochemistry Unit, Faculty of Medical Sciences, The University of the West Indies | Adesh Ramsuhbag; Arianne Brown-Jordan; Avery Hinds; Chinna Chinnadura; Christine V. F. Carrington; Christopher Oura; Gabriel Escobar; Jaya Jayaraman; Jerome Foster; Karla Georges; Kenneth George; Marsha Ivey; Naresh Nandram; Nikita S. D. Sahadeo; Nuno Faria; Oliver Pybus; Rahul Naidu; Rajini Haraksingh; Risha Singh; Sarah Hill; Stanley Giddings; SueMin Nathaniel; Vernie Ramkissoon                                                                                                                                                                                                         |
| EPI_ISL_872193                                                                                                                                                                                                                                                                                                                                                                                                                                                                             | Caribbean Public Health Agency                                                                                        | Carrington Lab, Department of Building 36, First Floor Biochemistry Unit, Faculty of Medical Sciences, The University of the West Indies                       | Adesh Ramsuhbag; Arianne Brown-Jordan; Avery Hinds; Chinna Chinnadura; Christine V. F. Carrington; Christopher Oura; Gabriel Escobar; Jaya Jayaraman; Jerome Foster; Karla Georges; Marsha Ivey; Naresh Nandram; Nikita S. D. Sahadeo; Nuno Faria; Oliver Pybus; Rahul Naidu; Rajini Haraksingh; Risha Singh; Sarah Hill; Stanley Giddings; SueMin Nathaniel; Vernie Ramkissoon                                                                                                                                                                                                                         |
| EPI_ISL_522446                                                                                                                                                                                                                                                                                                                                                                                                                                                                             | Center for Laboratory Control of Infectious Diseases, Korea Centers for Diseases Control and Prevention               | Center for Laboratory Control of Infectious Diseases, Korea Centers for Diseases Control and Prevention                                                        | Ae Kyung Park; Eunkyung Shin; Heul Man Kim; Jeong-Min Kim; Jin Sun No; Junyoung Kim; Myung Guk Han; Yoon-Seok Chung                                                                                                                                                                                                                                                                                                                                                                                                                                                                                     |
| EPI_ISL_2835622, see above                                                                                                                                                                                                                                                                                                                                                                                                                                                                 | EPI_ISL_2835623, EPI_ISL_2835625, EPI_ISL_2835635, EPI_ISL_2835636, EPI_ISL_2835637, EPI_ISL_2835640                  | Center for Medical and Sanitary Research (CERMES)                                                                                                              | CDC Atlanta                                                                                                                                                                                                                                                                                                                                                                                                                                                                                                                                                                                             |
| EPI_ISL_475805                                                                                                                                                                                                                                                                                                                                                                                                                                                                             | Center for Virology, Medical University of Vienna                                                                     | Bergthaler laboratory, CeMM Research Center for Molecular Medicine of the Austrian Academy of Sciences                                                         | Alexander Lercher; Alexandra Popa; Andreas Bergthaler; Benedikt Agerer; Christoph Bock; Daniela Schmid; Dorothee von Laer; Elisabeth Puchhammer-Stoeckl; Franz Allerberger; Gregor Hörmann; Guenter Weiss; Henrique Colaco; Jakob-Wendelin Genger; Jan Laine; Judith Aberle; Kinga Rigler-Hohenwarter; Lukas Endler; Manfred Nairz; Mark Smyth; Martin Senekowitsch; Michael Schuster; Peter Hufnagl; Rainer Gattlinger; Stephan Aberle; Thomas Penz; Wegene Borena                                                                                                                                     |
| EPI_ISL_678248                                                                                                                                                                                                                                                                                                                                                                                                                                                                             | Center for public health - Skopje                                                                                     | Research Center for Genetic Engineering and Biotechnology "Georgi D. Efremov" , Macedonian Academy of Sciences and Arts                                        | RCGEB - MASA                                                                                                                                                                                                                                                                                                                                                                                                                                                                                                                                                                                            |
| EPI_ISL_2227328, see above                                                                                                                                                                                                                                                                                                                                                                                                                                                                 | EPI_ISL_2227329, EPI_ISL_2227331, EPI_ISL_2227339, EPI_ISL_2227350, EPI_ISL_2232273, EPI_ISL_2232407, EPI_ISL_2380078 | Center of Scientific Excellence for Influenza Viruses (CSEIV), National Research Centre                                                                        | Ahmed E Kayed; Ahmed El-Taweel; Ahmed Kandiel; Ahmed Mostafa; Amal Naquib; Ghazi Kayali; M K Khalifa; Mahmoud Shehata; Mina Kamel; Mohamed Ahmed Ali; Mohamed El Sayes; Mohamed Hassany; Mokhtar Gomaa; Nancy M. El Guindy; Noura M Abo Shama; Omnia Kutkat; Rabeh El-Shehny; Richard Webby; Sara Mahmoud; Shymaa S Ahmed; Wael Roshdy; Yassmin Moatasim                                                                                                                                                                                                                                                |
| EPI_ISL_815255, EPI_ISL_815297                                                                                                                                                                                                                                                                                                                                                                                                                                                             | Centogene                                                                                                             | Centogene                                                                                                                                                      | Krishna Kumar Kandaswamy; Peter Bauer; Vivi Hue-Trang Lieu                                                                                                                                                                                                                                                                                                                                                                                                                                                                                                                                              |
| EPI_ISL_2834910, EPI_ISL_2834911, EPI_ISL_2834914, EPI_ISL_2834915                                                                                                                                                                                                                                                                                                                                                                                                                         | Central Health Laboratory                                                                                             | Central Health Laboratory ,Victoria Hospital, Candos,Ministry of Health and Wellness, Mauritius                                                                | Bahadoor BS; Jannoo N; Manraj SS; Mathur H; Ramuth M; Sonoo J; Sujeewon C                                                                                                                                                                                                                                                                                                                                                                                                                                                                                                                               |
| EPI_ISL_2502387, EPI_ISL_2502426, EPI_ISL_2502435, EPI_ISL_2502441                                                                                                                                                                                                                                                                                                                                                                                                                         | Central Laboratory, Bureau of Public Health (BOG) and Academic Hospital Paramaribo                                    | Erasmus Medical Center                                                                                                                                         | Bas B Oude Munnink; Cherise Beek; Consuella Partowidjojo; Dion Gajadin; Ed Pf IJzerman; Emmanuelle Munger; Gary Gummels; Ingrid SK Krishnadath; Lycke Woittiez; Marion PG Koopmans; Mireille Van de Veer; Phyllis Pinas; Princes Wongsowidjojo; Radjesh Ori; Ranisha Doerbalie; Rohma Banwari; Soeradj Harkisoen; Stephen Vredem; Tlotmadebie Ramlal; Verne Nanhoe                                                                                                                                                                                                                                      |
| EPI_ISL_1822739, EPI_ISL_1822744, EPI_ISL_1822754, EPI_ISL_1822766                                                                                                                                                                                                                                                                                                                                                                                                                         | Central Medical Laboratory                                                                                            | Texas Children's Microbiome Center                                                                                                                             | Adrianna Maliga; Francis Morey; Gerhaldine Morazan; Jennifer K. Spinler; Kristy O. Murray; Melissa Diaz-Musa; Miguel Saldana; Russell I Manzanero; Ruth Ann Luna; Sarah M. Gunter; Shannon E. Ronca                                                                                                                                                                                                                                                                                                                                                                                                     |
| EPI_ISL_1322330                                                                                                                                                                                                                                                                                                                                                                                                                                                                            | Central Public Health Laboratory                                                                                      | National Public Health Laboratory, National Centre for Infectious Diseases                                                                                     | Esorom Daoni; Lin Cui; Raymond Tzer Pin Lin; Theresa Palou; Tze Minn Mak; Zhenyang Zhou                                                                                                                                                                                                                                                                                                                                                                                                                                                                                                                 |
| EPI_ISL_2786923                                                                                                                                                                                                                                                                                                                                                                                                                                                                            | Central Virology Laboratory, Ministry of Health                                                                       | Central Virology Laboratory, Ministry of Health                                                                                                                | Amos Adler; Efrat Bucris; Ella Mendelson; Michal Mandelboim; Moran Shwartzwort-Cohen; Neta S. Zuckerman; Noam Protter; Oran Erster; Orna Mor; Saar Burstein                                                                                                                                                                                                                                                                                                                                                                                                                                             |
| EPI_ISL_885143                                                                                                                                                                                                                                                                                                                                                                                                                                                                             | Central public health laboratory                                                                                      | Molecular Diagnostics Department, Central public health laboratory                                                                                             | Dalia, F.; Dler, H.; Dlishad, H.; F.-A.; Fahmi, A.; Furat, S.; Hemdad, A.; Hemn; M. and Idrees, H.; Mohsen, A.; Sharmeen                                                                                                                                                                                                                                                                                                                                                                                                                                                                                |
| EPI_ISL_1483780, EPI_ISL_1357604                                                                                                                                                                                                                                                                                                                                                                                                                                                           | Centre De Prelevement COVID RIOM<br>Centre For Biotechnology Research And Development                                 | CHU Clermont-Ferrand, service de virologie<br>THE AFRICA GENOMICS CENTRE AND CONSULTANCY                                                                       | Bisseux Maxime; Combes Patricia; Henquell Cécile; Mirand Audrey<br>Adede Hawi; Cecilia Waruhii; Damaris Matoke-Muhia; George Michuki; John Njuguna; Lilian Kanjau; Ravena Mubichi                                                                                                                                                                                                                                                                                                                                                                                                                       |
| EPI_ISL_1706459                                                                                                                                                                                                                                                                                                                                                                                                                                                                            | Centre Hospitalier Eure Seine                                                                                         | Centre Hospitalier Universitaire de Rouen Laboratoire de Virologie                                                                                             | Alice Moisan; Fabienne De Oliveira; Marie Leoz                                                                                                                                                                                                                                                                                                                                                                                                                                                                                                                                                          |
| EPI_ISL_1483774, EPI_ISL_1483776, EPI_ISL_1483786, EPI_ISL_1490236                                                                                                                                                                                                                                                                                                                                                                                                                         | Centre Hospitalier Universitaire Clermont-Ferrand                                                                     | CHU Clermont-Ferrand, service de virologie                                                                                                                     | Bisseux Maxime; Combes Patricia; Henquell Cécile; Mirand Audrey                                                                                                                                                                                                                                                                                                                                                                                                                                                                                                                                         |
| EPI_ISL_1760556                                                                                                                                                                                                                                                                                                                                                                                                                                                                            | Centre Hospitalier Universitaire Mère-Enfant, Fondation Jeanne Ebori (CHUMEFJE)                                       | Centre de recherches médicales de Lambaréné (CERMEL)                                                                                                           | Ayola A. Adegnika; Ayong Moure; Bertrand Lell; Bénédicte Ndeboko; Emilio Skarwan; Georgelin Nguema Ondo; Gédéon P. Manouava; Haruka Abe; Jiro Yasuda; Joel Fleury Djoba Siawaya; Rodrigue Bikangui; Rotimi Myrabelle Avome Houechehou; Samira Zoa-Assoumou; Yuri Ushijima                                                                                                                                                                                                                                                                                                                               |
| EPI_ISL_660442                                                                                                                                                                                                                                                                                                                                                                                                                                                                             | Centre Muraz                                                                                                          | Project group Epidemiology of Highly Pathogenic Microorganisms, Robert Koch Institut                                                                           | Abdoul-Salam Ouedraogo; Arsène Zongo; Essia Belarbi; Fabian Leendertz; Grit Schubert; Soumeya Ouangraoua; Yacouba Sawadogo                                                                                                                                                                                                                                                                                                                                                                                                                                                                              |
| EPI_ISL_1790093, EPI_ISL_1790101                                                                                                                                                                                                                                                                                                                                                                                                                                                           | Centre Pasteur Annexe de Garoua                                                                                       | Institut Pasteur de Dakar                                                                                                                                      | Carniel Elisabeth; Dia Ndongo; Diagne Moussa Moïse; Diallo Amadou; Diop Mamadou; Faye Ousmane; Loucoubar Cheikh; Ndiaye Ndack; Njoum Richard; Sall Amadou Alpha; Sankhe Safetou                                                                                                                                                                                                                                                                                                                                                                                                                         |
| EPI_ISL_1001043, EPI_ISL_1001049, EPI_ISL_1001052, EPI_ISL_1001056, EPI_ISL_1001057                                                                                                                                                                                                                                                                                                                                                                                                        | Centre Pasteur du Cameroun                                                                                            | Institut Pasteur de Dakar                                                                                                                                      | Njoum Richard                                                                                                                                                                                                                                                                                                                                                                                                                                                                                                                                                                                           |
| EPI_ISL_788935, EPI_ISL_788938                                                                                                                                                                                                                                                                                                                                                                                                                                                             | Centre de Recherche et de Formation en Infectiologie Guinée                                                           | TransVIHMI, IRD/INSERM/Monpellier University                                                                                                                   | Abdoul Karim SOUMAH; Abdoulaye TOURE; Ahidjo AYOUBA; Alimou CAMARA; Alpha Kabinet KEITA; Bouna Yatassaye; Christelle BUTEL; Eric DELAPORTE; Jean-louis MONEMOU; Joel KOIVOGUI; Kaba KOUROUMA; Laetitia SERRANO; Mamadou Bhoeye KEITA; Mamadou Saliou BAH; Mamadou Saliou SOW; Mandiou DIAKITE; Martine PEETERS; Moriba POVOGUI; Penda Malhado DIALLO; Sakoba KEITA                                                                                                                                                                                                                                      |
| EPI_ISL_1913035, EPI_ISL_1913078, EPI_ISL_1913080, EPI_ISL_2097228, EPI_ISL_2097229, EPI_ISL_2097230, EPI_ISL_2097231, EPI_ISL_2424136, EPI_ISL_2424137, EPI_ISL_2424159, EPI_ISL_2424160, EPI_ISL_2424161, EPI_ISL_2424162, EPI_ISL_2424163, EPI_ISL_2434970, EPI_ISL_2434971, EPI_ISL_2434974, EPI_ISL_2434975, EPI_ISL_2434979, EPI_ISL_2434980, EPI_ISL_2442203, EPI_ISL_2442276, EPI_ISL_2442277, EPI_ISL_2442279, EPI_ISL_2442338, EPI_ISL_2442363, EPI_ISL_2442383, EPI_ISL_2442384 | see above                                                                                                             | Centre de Recherches Médicales de Lambaréné (CERMEL)                                                                                                           | Anicet Mouity Matoumba; Bertrand Lell and Ayola Akim Adegnika; Georgelin Nguema Ondo; Gédéon Prince Manouava; Jean Bernard Lekana-Douki; Joël-Fleury Djoba Siawaya; Michel Ngonga Dikongo; Moustapha Nzamba Maloum; Rodrigue Bikangui; Sam O'neilla Oye Binguo; Samira Zoa Assoumou; Srinivas reddy Pallerla; Steffen Bormann; Thirumalaisamy P. Velavan                                                                                                                                                                                                                                                |
| EPI_ISL_2968051                                                                                                                                                                                                                                                                                                                                                                                                                                                                            | Centre de Virologie des Maladies Infectieuses Tropicales                                                              | Functional Genomic Platform UATRS-biology, CNRST                                                                                                               | Ahmed REGGAD; Elmostaef EL FAHIME; Hemlali Mouhssine; Hicham EL ANNAZ; Idriss-Amine LAHLOU; Khalid ENNIBI; Marouane MELLOULI; Mly Abdelaziz ELALAOUI; Mostafa ELOUENASS; Nadia TOUIL; Rachid ABI; Rida TAGAJDID; Safae ELKOCHE; Sanaa ALAOUI-Amine; Youssef AKHOUD; Zohour KASMY                                                                                                                                                                                                                                                                                                                        |
| EPI_ISL_1233112, see above                                                                                                                                                                                                                                                                                                                                                                                                                                                                 | EPI_ISL_1233116, EPI_ISL_1717101, EPI_ISL_1717106, EPI_ISL_1970392, EPI_ISL_2481326, EPI_ISL_2481406                  | Centre for Dengue Research and AICBU, Department of Immunology and Molecular Medicine                                                                          | Chandima Jeewandara; Deshan Madhusanka; Deshni Jayathilaka; Dinuka Ariyaratne; Diyanath Ranasinghe; Gathsaurie Neelika Malavige; Laksiri Gomes; Tibutius Thanesh Pramanayagam                                                                                                                                                                                                                                                                                                                                                                                                                           |
| EPI_ISL_668452                                                                                                                                                                                                                                                                                                                                                                                                                                                                             | Centre for Dengue Research, Department of Immunology and Molecular Medicine                                           | Centre for Dengue Research, Department of Immunology and Molecular Medicine                                                                                    | Chandima Jeewandara; Deshni Jayathilaka; Dinuka Ariyaratne; Diyanath Ranasinghe; Gathsaurie Neelika Malavige; Laksiri Gomes                                                                                                                                                                                                                                                                                                                                                                                                                                                                             |
| EPI_ISL_654794                                                                                                                                                                                                                                                                                                                                                                                                                                                                             | Centre for Human Virology &                                                                                           | Centre for Human Virology & Genomics, Nigerian Institute of                                                                                                    | Shaibu, J.                                                                                                                                                                                                                                                                                                                                                                                                                                                                                                                                                                                              |

| Genomics, Nigerian Institute of Medical Research                                                                                                                                                           |                                                                                                                                                                                                                     | Medical Research                                                                                                                                    |                                                                                                                                                                                                                                                                                                                                                                                                                      |
|------------------------------------------------------------------------------------------------------------------------------------------------------------------------------------------------------------|---------------------------------------------------------------------------------------------------------------------------------------------------------------------------------------------------------------------|-----------------------------------------------------------------------------------------------------------------------------------------------------|----------------------------------------------------------------------------------------------------------------------------------------------------------------------------------------------------------------------------------------------------------------------------------------------------------------------------------------------------------------------------------------------------------------------|
| EPI_ISL_2399462, EPI_ISL_2501079, EPI_ISL_2501085, EPI_ISL_2502021                                                                                                                                         | Centre for Human Virology and Genomics, Microbiology Department, Nigerian Institute of Medical Research                                                                                                             | Central Research Laboratory, Nigerian Institute of Medical Research                                                                                 | Ayorinde Babatunde James; Azuka Patrick Okwuraiwe; Babatunde Lawal Salako; Bamidele Iwalokun; Chika Kingsley Onwuamah; Grace Oni; Joseph Ojonugwa Shaibu; Josiah Ayoola Isong; Joy Ayoola; Muinah Adenike Fowora; Ngozi Mirabel Otuonye; Nyam Itse Yusuf; Olufemi Samuel Amoo; Phasha-Muchemenye Mmatshepho; Rahaman A. Ahmed; Rosemary Ajuma Audu; Sharon Abimbola; Sola Ajibaye; Uyi Emokpae; Yusuf Jimoh          |
| EPI_ISL_413550                                                                                                                                                                                             | Centre for Human and Zoonotic Virology (CHAZVY), College of Medicine University of Lagos/Lagos University Teaching Hospital (LUTH), part of the Laboratory Network of the Nigeria Centre for Disease Control (NCDC) | African Centre of Excellence for Genomics of Infectious Diseases (ACEGID), Redeemer's University, Ede, Osun State, Nigeria                          | Ajogbasile F.V.; Folarin O.A.; Ihekweazu C. Happi C.T.; Kayode A.; Oguzie J.; Oluniyi P.E.                                                                                                                                                                                                                                                                                                                           |
| EPI_ISL_413595                                                                                                                                                                                             | Centre for Infectious Diseases and Microbiology Laboratory Services                                                                                                                                                 | NSW Health Pathology - Institute of Clinical Pathology and Medical Research; Westmead Hospital; University of Sydney                                | Carter I; Chen SC; Eden J-S; Gall; Gray K; Holmes EC; Kok J and Dwyer DE for the 2019-nCoV Study Group*; Lam C; M; Maddocks S; O'Sullivan MV; Rahman H; Rockett R; Sintchenko V; Timms; V                                                                                                                                                                                                                            |
| EPI_ISL_1469655                                                                                                                                                                                            | Centro Municipal de Saúde de Rolante                                                                                                                                                                                | Epiclin                                                                                                                                             | Ana Paula Muterle; Carolina Comerlato; Eliana Márcia Da Ros Wendland; Fernando Hayashi Sant'Anna; Janira Prichula; Juliana Comerlato                                                                                                                                                                                                                                                                                 |
| EPI_ISL_2274037                                                                                                                                                                                            | Centro Nacional de Enfermedades Tropicales (CENETROP)                                                                                                                                                               | Laboratory of Respiratory Viruses and Measles, Oswaldo Cruz Institute, FIOCRUZ                                                                      | Alice Sampaio Rocha; Ana Carolina Mendonca; Anna Carolina Paixao; Cinthia Avila; Elisa Cavalcante Pereira; Fernando Motta; Luciana Appolinario; Marilda Siqueira on behalf of the Fiocruz COVID-19 Genomic Surveillance Network; Paola Resende; Renata Serrano Lopes; Roxana Loayza; Taina Venas                                                                                                                     |
| EPI_ISL_1494674                                                                                                                                                                                            | Centro de Investigación en Ciencias de la Salud y Biomedicina, U.A.S.L.P                                                                                                                                            | Centro de Investigación en Ciencias de la Salud y Biomedicina, U.A.S.L.P                                                                            | MD PhD Sofia Bernal Silva                                                                                                                                                                                                                                                                                                                                                                                            |
| EPI_ISL_2442164, EPI_ISL_2442161, EPI_ISL_2442185                                                                                                                                                          | Centro de Investigação em Saúde de Manhiça (CISM) & ISGlobal, Institut de Salut Global de Barcelona                                                                                                                 | Instituto de Biomedicina de València - CSIC                                                                                                         | Alfredo Mayor; Arsenia Massinga; Inacio Mandomando; Irving Cancino; Iñaki Comas; Manoli Torres Puente; Santiago Jiménez-Serrano                                                                                                                                                                                                                                                                                      |
| EPI_ISL_1396418                                                                                                                                                                                            | Centro de Tecnología en Salud Pública de la Universidad Nacional de Rosario                                                                                                                                         | Laboratorio Mixto de Biotecnología Acuática (LMBA) on behalf of "Proyecto Argentino Interinstitucional de genómica de SARS-CoV-2" (PAIS Consortium) | Adriana Giri; Agustina Cerri; Ana Cavatorra; Ana Paletta; Diego Chouhy; Elisa Bolatti; Elizabeth Tapia (argenTAG); Federico Remes Lenicov; Flavio Spetale; Gastón Viarengo; Ignacio García Labarí; Javier Murillo; Joaquín Ezpeleta; Julian Acosta; Laura Angelone; Leandro Ciappina; María Re; Pablo Casal; Pilar Bulacio; Silvana Spinelli; Silvia Arranz; Sofia Lavista Llanos; Vanina Villanova; Victoria Posner |
| EPI_ISL_2798996, EPI_ISL_2799099                                                                                                                                                                           | Centrālā Laboratorija, SIA                                                                                                                                                                                          | Riga East University Hospital, National Microbiology Reference Laboratory; Eurofins Genomics Europe Sequencing GmbH                                 | Arzu Algulieva; Diāna Dušacka; Dārta Pūpola; Ilva Pole; Jana Osīte; Jevgenijs Bodrenko; Jūlija Čevere; Reinis Vangravs; Reinis Zeltmatis; Sergejs Nikšins; Stella Lapiņa; Ģirts Šķenders                                                                                                                                                                                                                             |
| EPI_ISL_486416, EPI_ISL_534206                                                                                                                                                                             | Centrālā laboratorija                                                                                                                                                                                               | Latvian Biomedical Research and Study Centre                                                                                                        | Ivars Silamiķelis; Jana Osīte; Jānis Kloviņš; Jānis Pjalkovskis; Kaspars Megnis; Marta Priedīte; Monta Ustinoва; Stella Lapiņa; Uga Dumpis; Vita Rovīte; Ņikita Zrelovs                                                                                                                                                                                                                                              |
| EPI_ISL_2504134, EPI_ISL_2504141, EPI_ISL_2504142                                                                                                                                                          | Chantal Biya International Reference Centre (CIRCB)                                                                                                                                                                 | International Centre for Genetic Engineering and Biotechnology (ICGEB) and ARGO Open Lab for Genome Sequencing                                      | Alessandro Marcello; Alexis Ndiolo; Celine Nkenfu; Collins Chenwi; Danilo Licastro; Desire Takou; Emanuele Orsini; Grace Angong Belournou; Joseph Fokam; Ndine Fainguem; Simeone Dal Monego                                                                                                                                                                                                                          |
| EPI_ISL_1239292                                                                                                                                                                                            | Charlotte Maxeke Johannesburg Academic Hospital, National Health Laboratory Services, Gauteng, South Africa                                                                                                         | National Institute for Communicable Diseases of the National Health Laboratory Service                                                              | Amoako DG; Bhiman JN; Ismail A; Mahlangu B; Mohale T; Ntuli N; Scheepers C                                                                                                                                                                                                                                                                                                                                           |
| EPI_ISL_492028, EPI_ISL_1634462, EPI_ISL_2178951                                                                                                                                                           | Child Health Research Foundation                                                                                                                                                                                    | Child Health Research Foundation                                                                                                                    | Afroza Akter Tanni; CHRf Bangladesh Genomics Team; Maksuda Islam; Md Hafizur Rahman; Md Saiful Islam Sajib; Roly Malaker; Samir K Saha; Senjuti Saha; Syed Muktadir Al Sium                                                                                                                                                                                                                                          |
| EPI_ISL_1970349                                                                                                                                                                                            | Chongqing International Travel Health Care Center                                                                                                                                                                   | Chongqing Municipal Center for Disease Control and Prevention                                                                                       | Hua Ling; Mingyue Wang; Rong Rong; Sheng Ye; Wenge Tang; Xingdan Luo; Yanqing Peng; Yun Tang; Zhangping Tan; Zhaohui Deng ; Shuang Chen; Zhen Yu                                                                                                                                                                                                                                                                     |
| EPI_ISL_3118692                                                                                                                                                                                            | Chris Hani Baragwanath Academic Hospital POC laboratory                                                                                                                                                             | KRISP, KZn Research Innovation and Sequencing Platform                                                                                              | Brown MJ; Emmanuel SJ; Ghandhari J; Lessells R; Omar S; Pillay S; Tegally H; Wadula J; Wilkinson E; Yajna R; de Oliveira T                                                                                                                                                                                                                                                                                           |
| EPI_ISL_2839458                                                                                                                                                                                            | City General Hospital "8 Septemvri"-Skopje                                                                                                                                                                          | Research Center for Genetic Engineering and Biotechnology "Georgi D. Efremov" , Macedonian Academy of Sciences and Arts                             | Aleksandar J. Dimovski; Dijana Plasheska-Karanfilska; Gjorgji Bozinovski; Milena Jakimovska; Predrag Noveski                                                                                                                                                                                                                                                                                                         |
| EPI_ISL_636981                                                                                                                                                                                             | City of Chimoio                                                                                                                                                                                                     | KRISP, KZN Research Innovation and Sequencing Platform                                                                                              | Ghandhari J; Ismael N; Nadia Siteo; Nedio Mabunda; Paulo Arnaldo; Pillay S; Tegally H; Wilkinson E; de Oliveira T                                                                                                                                                                                                                                                                                                    |
| EPI_ISL_1300645, EPI_ISL_1300658                                                                                                                                                                           | Clinical Center, University of Sarajevo; Unit for Clinical Microbiology                                                                                                                                             | Clinical Center, University of Sarajevo; Unit for Clinical Microbiology                                                                             | Amela Dedić-Ljubović; Edina Zahirović; Golubinka Boshevska; Irma Salimović-Bešić; Maja Kuzmanovska; Sandra Vegar-Zubović; Sebjia Izetbegović; Suzana Arapčić                                                                                                                                                                                                                                                         |
| EPI_ISL_678259                                                                                                                                                                                             | Clinical Hospital - Shtip                                                                                                                                                                                           | Research Center for Genetic Engineering and Biotechnology "Georgi D. Efremov" , Macedonian Academy of Sciences and Arts                             | RCGEB - MASA                                                                                                                                                                                                                                                                                                                                                                                                         |
| EPI_ISL_2692993                                                                                                                                                                                            | Clinical Microbiology Laboratory, Faculty of Medicine, Universitas Indonesia                                                                                                                                        | Clinical Microbiology Laboratory, Faculty of Medicine, Universitas Indonesia                                                                        | Fitriyah; Ibrahim F; Karuniawati A; Natasha A; Saharman YR; Sudarmono P.; Yasmon A                                                                                                                                                                                                                                                                                                                                   |
| EPI_ISL_581704, EPI_ISL_830804                                                                                                                                                                             | Clinical Virology                                                                                                                                                                                                   | Clinical Bacteriology                                                                                                                               | Adrian Egli; Alexander Gensch; Alfredo Mari; Christian Nickel; Hans Hirsch; Hans Pargger; Helena MB Seth-Smith; Julia Bielicki; Karoline Leuzinger; Kirstine K. Soegaard; Madlen Stange; Manuel Battegay; Martin Siegemund; Michael Osthoff; Michael Schweitzer; Myrta Brunner; Rita Schneider-Silfemala; Rita Schneider-Sliwa; Roland Bingisser; Sarah Tschudin-Sutter; Simon Fuchs; Stefano Bassetti; Tim Roloff   |
| EPI_ISL_3276927, EPI_ISL_3276991                                                                                                                                                                           | Clinical Virology Laboratory, Institute of Liver and Biliary Sciences                                                                                                                                               | ILBS                                                                                                                                                | Amit Pandey; Chhagan Bihari Sharma; Diptanu Paul; Ekta Gupta; Reshu Agarwal; Shiv Kumar Sarin; Varun Suroliya                                                                                                                                                                                                                                                                                                        |
| EPI_ISL_447335                                                                                                                                                                                             | Clinical Virology Unit, Hadassah Hebrew University Medical Center                                                                                                                                                   | Stern Lab                                                                                                                                           | Stern Lab                                                                                                                                                                                                                                                                                                                                                                                                            |
| EPI_ISL_1935606, EPI_ISL_2492428                                                                                                                                                                           | Cliniques universitaires Saint-Luc                                                                                                                                                                                  | UCLouvain/REC/MBLG                                                                                                                                  | Benoit Kabamba Mukadi; Eleonore Ngyuvula; Jean Ruelle                                                                                                                                                                                                                                                                                                                                                                |
| EPI_ISL_1234167                                                                                                                                                                                            | Colorado Department of Public Health and Environment                                                                                                                                                                | Colorado Department of Public Health and Environment                                                                                                | Diana Ir; Emily A. Travanty; Laura Bankers; Molly C. Hetherington-Rauth; Sarah Elizabeth Totten; Shannon Ely; Shannon R. Matzinger                                                                                                                                                                                                                                                                                   |
| EPI_ISL_681309, EPI_ISL_2715285, EPI_ISL_2715287, EPI_ISL_2715288, EPI_ISL_2932624, EPI_ISL_2932655, EPI_ISL_2932663                                                                                       | see above                                                                                                                                                                                                           | Communicable Disease Laboratory, Public Health Directorate                                                                                          | AIAbbas, Z.; AlHujairi, Z.; Almoamen, G.; Altaif, Z.; Alwasti, H.; Marhoun, A.                                                                                                                                                                                                                                                                                                                                       |
| EPI_ISL_2375921, EPI_ISL_3014108                                                                                                                                                                           | Concordia Clinic Cotugno                                                                                                                                                                                            | NHLS/UCT TIGEM                                                                                                                                      | Arash Iranzadeh; Bruna Galvao; Carolyn Williamson; Deelan Doolabh; Diana Hardie; Innocent Mudau; Kruger Marais; Lynn Tyers; Marvin Hsiao; Stephen Korsman                                                                                                                                                                                                                                                            |
| EPI_ISL_1084757, EPI_ISL_3105882                                                                                                                                                                           | Croatian Institute of Public Health Cruz-Rabe Maternity and General Hospital                                                                                                                                        | Croatian Institute of Public Health Research Institute for Tropical Medicine                                                                        | Antonio Grimaldi Patrizia Annunziata Francesco Panariello Bianca Maria Pierr Claudia Tiberio Teresa Giuliano Valentina Bouche Chiara Colantuono Maria Concetta Cuomo Denise Di Concilio Lucio Di Filippo Anna Manfredi Marcello Salvi Antonio Limone Luigi Atripaldi Pellegrino Cerino Andrea Ballabio Davide Cacchiarelli Irena Tabain; Ivana Ferenčak                                                              |
| EPI_ISL_2153497                                                                                                                                                                                            | DR GEORGE MUKHARI LABORATORY                                                                                                                                                                                        | National Institute for Communicable Diseases of the National Health Laboratory Service                                                              | Amoako DG; Bhiman JN; Ismail A; Mahlangu B; Mohale T; Ntuli N; Scheepers C                                                                                                                                                                                                                                                                                                                                           |
| EPI_ISL_2595726, EPI_ISL_2596341, EPI_ISL_2597312, EPI_ISL_2612300                                                                                                                                         | DSMRC                                                                                                                                                                                                               | DSMRC                                                                                                                                               | Khire Zaw Oo; Ko Ko Lwin; Ko Ko Win; Kyeey Myint; Nay Myo Aung; Pai Khant Kyaw; Phyo Kyaw Aung; Thet Wai Oo; Zaw Win Htun                                                                                                                                                                                                                                                                                            |
| EPI_ISL_1312896, EPI_ISL_1457768                                                                                                                                                                           | DYOMEDEA LYON                                                                                                                                                                                                       | CNR Virus des Infections Respiratoires - France SUD                                                                                                 | Antonin Bal; Bruno Lina; Gregory Destras; Gwendolyne Burfin; Hadrien Regue; Laurence Josset; Martine Valette; Quentin Semanas                                                                                                                                                                                                                                                                                        |
| EPI_ISL_2372406, EPI_ISL_2648206, EPI_ISL_2648207, EPI_ISL_2648208, EPI_ISL_2648209, EPI_ISL_2648211, EPI_ISL_2648214, EPI_ISL_2648215, EPI_ISL_2648217, EPI_ISL_2648218, EPI_ISL_2648219, EPI_ISL_2648220 | DYOMEDEA SAUVEGARDE LYON                                                                                                                                                                                            | CNR Virus des Infections Respiratoires - France SUD                                                                                                 | Antonin Bal; Bruno Lina; Gregory Destras; Gwendolyne Burfin; Hadrien Regue; Laurence Josset; Martine Valette; Quentin Semanas                                                                                                                                                                                                                                                                                        |
| see above                                                                                                                                                                                                  | Debswana Orapa Mine Hospital Laboratory                                                                                                                                                                             | Botswana Harvard HIV Reference Laboratory                                                                                                           | Boitumelo Zuze; Botshelo Radibe; Dorcas Maruapula; Joseph Makhema; Keoratlhe Ntshambiwa; Kgomotso Moruisi; Koketso Maotwe; Legodile Kooepile; Lesedi Magama; Madisa Mine; Mosepele Mosepele; Mpo Molapisi; Ontlametse T. Bareng; Pamela Smith-Lawrence; Roger Shapiro; Shahin Lockman; Sikhulile Moyo; Simani Gaseitsiwe; Thongbotho Mphoyakgosi; Wonderful T. Choga                                                 |
| EPI_ISL_2432518, EPI_ISL_2432922, EPI_ISL_2432953                                                                                                                                                          | Demy Health                                                                                                                                                                                                         | National Reference Laboratory, Nigeria Centre for Disease Control                                                                                   | Anthony Ahumbe; Catherine Okoi; Chimaobi Chukwu; Dr Chikwe Ihekweazu; Dr Ndodo Nnaemeka; Dr Omoare Adesuyi; Grace Esebanmen; Naidoo Dhamari; Nwando Mba; Olusola Anuoluwapo Akanbi                                                                                                                                                                                                                                   |
| EPI_ISL_1340764                                                                                                                                                                                            | Departamento de Virologia, Laboratorio Central de Salud Pública,                                                                                                                                                    | Laboratory of Respiratory Viruses and Measles, Oswaldo Cruz Institute, FIOCRUZ                                                                      | Alice Sampaio Rocha; Ana Carolina Mendonca; Anna Carolina Paixao; Cynthia Vazquez; Fernando Motta; Luciana Appolinario; Marilda Siqueira on behalf of the Fiocruz COVID-19 Genomic Surveillance Network; Paola Resende; Renata Serrano Lopes                                                                                                                                                                         |

|                                                                                                 |                                                                                                                                                                                         |                                                                                                                                                                                         |                                                                                                                                                                                                                                                                                                                                                                                                                                                                                                                                                                               |
|-------------------------------------------------------------------------------------------------|-----------------------------------------------------------------------------------------------------------------------------------------------------------------------------------------|-----------------------------------------------------------------------------------------------------------------------------------------------------------------------------------------|-------------------------------------------------------------------------------------------------------------------------------------------------------------------------------------------------------------------------------------------------------------------------------------------------------------------------------------------------------------------------------------------------------------------------------------------------------------------------------------------------------------------------------------------------------------------------------|
| EPI_ISL_1013600                                                                                 | Avenida Venezuela y Teniente Ecurra, Asunción, Paraguay<br>Department for Molecular Diagnostics, Centre for Medical Microbiology, Institute of Public Health, Montenegro                | Charité Universitätsmedizin Berlin, Institut für Virologie                                                                                                                              | Barbara Mühlemann; Christian Drosten; Danijela Vujošević; Julia Schneider; Julia Tesch; Jörn Beheim-Schwarzbach; Marija Govedarica; Talitha Veith; Terry Jones; Tobias Bleicker; Victor M Corman                                                                                                                                                                                                                                                                                                                                                                              |
| EPI_ISL_420142                                                                                  | Department for Virology, Molecular Biology and Genome Research, R. G. Lugar Center for Public Health Research, National Center for Disease Control and Public Health (NCDC) of Georgia. | Department for Virology, Molecular Biology and Genome Research, R. G. Lugar Center for Public Health Research, National Center for Disease Control and Public Health (NCDC) of Georgia. | Adam Kotorashvili; Amiran Gamkrelidze.; Ana Papkiauri; Ann Machablashvili; Anna Kasradze; Davit Tsaguria; Ekaterine Khmaladze; Ekaterine Zangaladze; Ekaterine Zhghenti; Giorgi Tomashvili; Gvantsa Brachveli; Gvantsa Chanturia; Irma Burjanadze; Ketevan Sidamonidze; Khatuna Zakhshvili; Lela Sabadze; Lela Urushadze; Magda Dgebadze; Maia Alkhashvili; Mari Gavashelidze; Mariam Zakalashvili; Marine Murtskvaladze; Meri Pantsulaia; Nino Berishvili; Paata Imnadze; Roena Sukhishvili; Tamar Jashishvili; Tata Imnadze; Tea Tvedoradze                                 |
| EPI_ISL_1914665,<br>EPI_ISL_1914783,<br>EPI_ISL_3098702,<br>EPI_ISL_3204239,<br>EPI_ISL_3204245 | Department for Virology, Molecular Biology and Genome Research, R. G. Lugar Center for Public Health Research, National Center for Disease Control and Public Health (NCDC) of Georgia. | Department for Virology, Molecular Biology and Genome Research, R. G. Lugar Center for Public Health Research, National Center for Disease Control and Public Health (NCDC) of Georgia. | Adam Kotorashvili; Amiran Gamkrelidze.; Ana Papkiauri; Ann Machablashvili; Anna Kasradze; Davit Tsaguria; Ekaterine Khmaladze; Ekaterine Zangaladze; Ekaterine Zhghenti; Giorgi Gogoladze; Giorgi Tomashvili; Gvantsa Brachveli; Gvantsa Chanturia; Irma Burjanadze; Ketevan Sidamonidze; Khatuna Zakhshvili; Lela Sabadze; Lela Urushadze; Magda Dgebadze; Maia Alkhashvili; Mari Gavashelidze; Mariam Zakalashvili; Marine Murtskvaladze; Meri Pantsulaia; Nato Kotaria; Nino Berishvili; Paata Imnadze; Roena Sukhishvili; Tamar Jashishvili; Tata Imnadze; Tea Tvedoradze |
| EPI_ISL_2670493                                                                                 | Department of Bacteria, Parasites and Fungi, Statens Serum Institut, Copenhagen, Denmark                                                                                                | Statens Serum Institut Bioinformatics and Microbial Genomics                                                                                                                            | Danish Covid-19 Genome Consortium                                                                                                                                                                                                                                                                                                                                                                                                                                                                                                                                             |
| EPI_ISL_515086                                                                                  | Department of Biochemistry, Cell and Molecular Biology                                                                                                                                  | WACCBIP, University of Ghana                                                                                                                                                            | A.K.; Adu, B.; Amenga-Etego; Ampofo, W.; Amuzu; Anang; Arjarquah, A.; Asante, I.; Awandare; Bediako, Y.; Boatemaa, L.; Bonney, E.; Bonney, K.; C.M.; D.S.; Eshun, M.; G.A.; G.B.; J.K.; J.M.; Kotey, E.; Kumordjie, S.; Kyei; L.N.; Magnussen, V.; Morang'a; Mutungi; Ngoi; Quashie, P.; Tei-Maya, F.                                                                                                                                                                                                                                                                         |
| EPI_ISL_884827                                                                                  | Department of Biochemistry, Cell and Molecular Biology, West African Centre for Cell Biology of Infectious Pathogens (WACCBIP), University of Ghana                                     | Department of Biochemistry, Cell and Molecular Biology, West African Centre for Cell Biology of Infectious Pathogens (WACCBIP), University of Ghana                                     | A.-K.; A.B.; Abass; Akoriyea; Amenga-Etego; Amoako, E.; Amuzu; Awandare; Bediako, Y.; Boakey; C.M.; D.S.; Diallo; G.A.; J.M.; Kibinge, N.; Kumi-Ansah, F.; L.N.; Magnussen, V.; Mohammed, A.; Morang'a; Ngoi; O.D.; Odom, T.; Quashie, P.; S.K.; Tapela, K.; Tei-Maya, F.                                                                                                                                                                                                                                                                                                     |
| EPI_ISL_540475<br>EPI_ISL_1870142                                                               | Department of Clinical Microbiology, Odense University Hospital, Odense, Denmark                                                                                                        | GIGA Medical Genomics<br>Aalborg University                                                                                                                                             | Axelle Chaslain; Bouchra Boujemla; Cécile Meex; Céline Fombellida-Lopez; Keith Durkin; Maria Artesi; Marie-Pierre Hayette; Pierrette Melin; Raphaël Boreux; Sébastien Bontems; Vincent Bours<br>Danish Covid-19 Genome Consortium                                                                                                                                                                                                                                                                                                                                             |
| EPI_ISL_2245688                                                                                 | Department of Experimental Modeling and Pathogenesis of Infectious Diseases                                                                                                             | WHO National Influenza Centre Russian Federation                                                                                                                                        | Alekseev A.Yu.; Andrey Komissarov; Anna Ivanova; Artem Fadeev; Chepurinov A.A.; Daria Danilenko; Dmitry Lioznov; Elena Nabieva; Georgii Bazzykin; Kirill Varchenko; Kononova Yu.V.; Ksenia Safina; Kseniya Komissarova; Maria Pisareva; Maria Timofeeva; Mikhail Bakaev; Nikita Yolshin; Oula Masour; Shestopalov A.M.; Sobolev I.A.; Tamila Musaeva; Veronika Eder                                                                                                                                                                                                           |
| EPI_ISL_1563631                                                                                 | Department of Genetic Engineering and Biotechnology, Shahjalal University of Science and Technology                                                                                     | Genomic Research Lab, BCSIR                                                                                                                                                             | Abu Sayeed Mohammad Mahmud; Ajit Ghosh; Barna Goswami; Eshrar Osman; G. M. Nurnabi Azad Jewel; Iffat Jahan; Md. Ahasan Habib; Md. Akkas Ali; Md. Asraful Jahan; Md. Fahmid Hossain Bhuiyan; Md. Hammadul Hoque; Md. Kamrul Islam; Md. Murshed Hasan Sarkar; Md. Nazmul Hasan; Md. Saddam Hossain; Md. Salim Khan; Md. Shamsul Haque Prodhani; Mohammad Mohi Uddin; Mohammad Samir Uzzaman; Shahina Akter; Tanjina Akhter Banu                                                                                                                                                 |
| EPI_ISL_1018303,<br>EPI_ISL_1020208,<br>EPI_ISL_2723768                                         | Department of Health Technology and Informatics, The Hong Kong Polytechnic University                                                                                                   | Department of Health Technology and Informatics, The Hong Kong Polytechnic University                                                                                                   | Alan Ka-Lun Wu; Alex Yat-Man Ho; Barry Kin-Chung Wong; Chloe Toi-Mei Chan; David Ho-Keung Shum; Denise Sze-Hang Wong; Gilman Kit-Hang Siu; Hiu-Yin Lao; Hoi-Ching Jim; Ivan Tak-Fai Wong; Jake Siu-Lun Leung; Kam-Tong Yip; Kenneth Siu-Sing Leung; Kingsley King-Gee Tam; Kitty Sau-Chun Fung; Kristine Luk; Lam-Kwong Lee; Miranda Chong-Yee Yau; Sandy Ka-Yee Chau; Shea Ping Yip; Tak-Lun Que; Timothy Ting-Leung Ng; Wing Cheong Yam; Wing-Hei Lo; Wing-Kin To; Yvette Wai-Man Lai                                                                                       |
| EPI_ISL_1495326                                                                                 | Department of Laboratory Medicine, Division of Clinical Virology, University of Medicine, Vienna                                                                                        | Bergthaler laboratory, CeMM Research Center for Molecular Medicine of the Austrian Academy of Sciences                                                                                  | Andreas Bergthaler; Anna Schedl; Bekir Erguner; Benedikt Agerer; Christoph Bock; Fabian Amman; Jan Laine; Lukas Endler; Maelle Le Moing; Martin Senekowitsch; Michael Schuster; Petr Triska; Thomas Penz                                                                                                                                                                                                                                                                                                                                                                      |
| EPI_ISL_538436,<br>EPI_ISL_538456,<br>EPI_ISL_538458                                            | Department of Laboratory Medicine, Tan Tock Seng Hospital                                                                                                                               | Department of Laboratory Medicine, Tan Tock Seng Hospital                                                                                                                               | Barkham TMS; Chen YYC; Li C; Lim JX; Maurer-Stroh S; Nagarajan N; Sessions OM; Tang WY; Zair X                                                                                                                                                                                                                                                                                                                                                                                                                                                                                |
| EPI_ISL_1192188                                                                                 | Department of Medical Microbiology, St. Olavs hospital                                                                                                                                  | Norwegian Institute of Public Health, Department of Virology                                                                                                                            | Atiya R Ali; Debech Nadia; Engebretsen Serina Beate; Garcia Lorente Ignacio; Hilde Elshaug; Hilde Vollan; Kamilla Heddeland Instefjord; Karoline Bragstad; Kathrine Stene-Johansen; Marie Paulsen Madsen; Olav Hungnes; Pedersen Benedikte Nevjen; Rasmus Riis Kopperud                                                                                                                                                                                                                                                                                                       |
| EPI_ISL_512844<br>EPI_ISL_2547429                                                               | Department of Medical Research<br>Department of Medical Virology, School of Medicine Ahvaz Jundishapur University of Medical sciences                                                   | DMR, Myanmar<br>Genetics Research Center, University of Social Welfare and Rehabilitation Sciences                                                                                      | Aung Kyaw Kyaw; Aung Zaw Latt; Hlaing Myat Thu; Hnin Ohnmar Soe; Htin Lin; Kay Thi Aye; Lai Lai San; Myat Htut Nyunt; Nan Aye Thida Oo; Ni Ni Zaw; Phyu Win Ei; Su Mon Win; Theingi Win Myat; Wah Wah Aung; Yi Yi Kyaw; Zaw Than Htun<br>Ahmad Tavakoli; Azarakhsh Azaran; Farid yousefi; Hossein Najmabadi.; Kimia Kahrizi; Maryam Beheshtian; Marzieh Mohseni; Mohammad Farahmand; Mohsen Savaei; Seyed Mohammad Jazayeri; Zohreh Fattahi                                                                                                                                   |
| EPI_ISL_3066017<br>EPI_ISL_1745697                                                              | Department of Microbiology<br>Department of Microbiology and Dentistry, Palacky University and University Hospital Olomouc                                                              | Department of Microbiology<br>Institute of Molecular and Translational Medicine / Laboratory of Experimental Medicine, Faculty of Medicine and Dentistry, Palacky University            | Paul K.S. Chan; Zigui Chen<br>Barbora Blumová; Hana Jaworek; Marián Hajdúch; Pavel Sauer; Rastislav Slavkovský; Tomáš Pospíšil; Vladimíra Koudeláková                                                                                                                                                                                                                                                                                                                                                                                                                         |
| EPI_ISL_2833646,<br>EPI_ISL_2833648,<br>EPI_ISL_2833655,<br>EPI_ISL_2833665                     | Department of Microbiology, National Institute for Public Health of Kosovo                                                                                                              | Charité Universitätsmedizin Berlin, Institut für Virologie                                                                                                                              | Aferdita Hyseni; Barbara Mühlemann; Blendt Jerliu; Christian Drosten; Donjeta Hajdari; Julia Schneider; Jörn Beheim-Schwarzbach; Nazmi Mehmeti; Pranvera Abazi; Talitha Veith; Terry Jones; Victor M Corman; Xhevat Jakupi; Zana Deva                                                                                                                                                                                                                                                                                                                                         |
| EPI_ISL_1164628,<br>EPI_ISL_1164630,<br>EPI_ISL_1164632,<br>EPI_ISL_1164633,<br>EPI_ISL_1164724 | Department of Molecular Virology, Cyprus Institute of Neurology and Genetics                                                                                                            | Department of Molecular Virology, Cyprus Institute of Neurology and Genetics                                                                                                            | Anastasis Oulas; Andreas Hadjisavvas; Christina Christodoulou; Christina Tryfonos; Dana Koptides; Denise Alexandrou; George Krashias; George Spyrou; Jan Richter; Maria Loizidou; Mihalis Panayiotidis; Olga Kalakouta; Pavlos Fanis; Stavros Bashiardes                                                                                                                                                                                                                                                                                                                      |
| EPI_ISL_2622046                                                                                 | Department of Pathology                                                                                                                                                                 | Centre for Research in Advanced Tropical Bioscience Universiti Malaysia Pahang, 26300 Gambang, Pahang, Malaysia                                                                         | Hajar Fauzan Bin Ahmad; Norhidayah Binti Kamarudin; Ummu Afeera Zainulabid                                                                                                                                                                                                                                                                                                                                                                                                                                                                                                    |
| EPI_ISL_439399                                                                                  | Department of Pathology, University of Cambridge                                                                                                                                        | Wellcome Sanger Institute for the COVID-19 Genomics UK (COG-UK) consortium                                                                                                              | Alex Alderton; Aminu S. Jahun; Anna Yakovleva; Charlotte J. Houldcroft; Cordelia Langford; David K. Jackson; Dominic Kwiatkowski; Ewan Harrison; Fahad A Khokhar; Grant Hall; Ian Goodfellow; Ian Johnston; John Sillitoe on behalf of the Wellcome Sanger Institute COVID-19 Surveillance Team ( <a href="http://www.sanger.ac.uk/covid-team">http://www.sanger.ac.uk/covid-team</a> ); Laura G Caller; Luke W Meredith; M. Estée Torök; Martin D. Curran; Myra Hosnillo; Roberto Amato; Sarah L. Caddy; Sonia Goncalves; Theresa Felwell; William L. Hamilton               |
| EPI_ISL_1969990,<br>EPI_ISL_2099884,<br>EPI_ISL_3375697                                         | Department of Public Health Bucharest                                                                                                                                                   | National Institute of Infectious Diseases-Prof. Dr. Matei Bals Molecular Diagnostics Laboratory                                                                                         | Andreea Tudor; Corina Casangiu; Dan Otelea; Leontina Banica; Marius Surleac; Ovidiu Vlaicu; Simona Paraschiv                                                                                                                                                                                                                                                                                                                                                                                                                                                                  |
| EPI_ISL_2687992                                                                                 | Department of Public Health Constanta                                                                                                                                                   | National Institute of Infectious Diseases-Prof. Dr. Matei Bals Molecular Diagnostics Laboratory                                                                                         | Corina Casangiu; Dan Otelea; Leontina Banica; Marius Surleac; Petre Milu; Robert Hohan; Simona Paraschiv                                                                                                                                                                                                                                                                                                                                                                                                                                                                      |
| EPI_ISL_1289875                                                                                 | Department of Public Health Microbiology Ljubljana, National Laboratory for Health, Environment and Food                                                                                | Department of Public Health Microbiology Ljubljana, National Laboratory for Health, Environment and Food                                                                                | José Gonçalves; Katarina Proscenc; Martin Bosilj; Metka Paragi; Tom Koritnik                                                                                                                                                                                                                                                                                                                                                                                                                                                                                                  |
| EPI_ISL_582509                                                                                  | Department of Respiratory and other Viral Infections of L.V.Gromashevsky Institute of Epidemiology & Infectious Diseases NAMS of Ukraine                                                | Department of Respiratory and other Viral Infections of L.V.Gromashevsky Institute of Epidemiology & Infectious Diseases NAMS of Ukraine, JSC "Farmak"                                  | Alla Mironenko; Andriy Goy; Ihor Kravchuk; Larysa Radchenko; Ludmyla Bolotova; Nataliia Teteriuk                                                                                                                                                                                                                                                                                                                                                                                                                                                                              |
| EPI_ISL_979973,<br>EPI_ISL_1315427                                                              | Department of Respiratory and other Viral Infections of L.V.Gromashevsky Institute of Epidemiology & Infectious Diseases NAMS of Ukraine                                                | Department of Respiratory and other Viral Infections of L.V.Gromashevsky Institute of Epidemiology & Infectious Diseases NAMS of Ukraine, JSC "Farmak"                                  | Alla Mironenko; Andriy Goy; Ihor Kravchuk; Larysa Radchenko; Ludmyla Bolotova; Nataliia Teteriuk                                                                                                                                                                                                                                                                                                                                                                                                                                                                              |
| EPI_ISL_654818                                                                                  | Department of Respiratory and other Viral Infections of L.V.Gromashevsky Institute of Epidemiology & Infectious Diseases NAMS of Ukraine                                                | Department of Respiratory and other Viral Infections of L.V.Gromashevsky Institute of Epidemiology & Infectious Diseases NAMS of Ukraine, JSC "Farmak"                                  | Alla Mironenko; Andriy Goy; Ihor Kravchuk; Larysa Radchenko; Ludmyla Bolotova; Nataliia Teteriuk                                                                                                                                                                                                                                                                                                                                                                                                                                                                              |
| EPI_ISL_1385791,<br>EPI_ISL_1969995,<br>EPI_ISL_2434781,<br>EPI_ISL_2438547,<br>EPI_ISL_2894973 | Department of Virology                                                                                                                                                                  | Department of Virology                                                                                                                                                                  | Aamer Ikram; Abdul Ahad; Austin Leach; Joel Montgomery; John Klena; Ketan Patel; Massab Umair; Melissa Mobley; Muhammad Ammar; Muhammad Salman; Nazish Badar; Qasim Ali; Sana Tamim; Shannon Whitmer; Syed Adnan Haider; Zaira Rehman                                                                                                                                                                                                                                                                                                                                         |

|                                                                                                                                                                                                                                                                                                                                                                                                                                                                                                                                                             |                                                                                                                                                                          |                                                                                                                                                       |                                                                                                                                                                                                                                                                                                                                                                                                                                                  |
|-------------------------------------------------------------------------------------------------------------------------------------------------------------------------------------------------------------------------------------------------------------------------------------------------------------------------------------------------------------------------------------------------------------------------------------------------------------------------------------------------------------------------------------------------------------|--------------------------------------------------------------------------------------------------------------------------------------------------------------------------|-------------------------------------------------------------------------------------------------------------------------------------------------------|--------------------------------------------------------------------------------------------------------------------------------------------------------------------------------------------------------------------------------------------------------------------------------------------------------------------------------------------------------------------------------------------------------------------------------------------------|
| EPI_ISL_481661, EPI_ISL_862055, EPI_ISL_3014888, EPI_ISL_3015047                                                                                                                                                                                                                                                                                                                                                                                                                                                                                            | Department of Virology and Immunology, University of Helsinki and Helsinki University Hospital, Huslab Finland                                                           | Department of Virology, Faculty of Medicine, University of Helsinki, Helsinki, Finland                                                                | Essi Korhonen; Hanna Jarva; Hanna Liimatainen; Hannimari Kallio-Kokko; Harri Kangas; Hussein Alburkat; Jenni Virtanen; Maija Lappalainen; Maija Suvanto; Olli Vapalahti; Pekka Ellonen; Phuoc Truong; Ravi Kartt; Sari Hannula; Satu Kurkela; Teemu Smura                                                                                                                                                                                        |
| EPI_ISL_855564, EPI_ISL_855571                                                                                                                                                                                                                                                                                                                                                                                                                                                                                                                              | Department of Virology, Principal Military Hospital of Instruction of Tunis                                                                                              | Bundeswehr Institute of Microbiology                                                                                                                  | Habiba Najja; Kilian Stoecker; Malena Bestehorn-Willmann; Markus H. Antwerpen; Mathias C. Walter; Roman Wölfel & Mohamed Ben Moussa; Simone Eckstein; Susann Handrick                                                                                                                                                                                                                                                                            |
| EPI_ISL_1867529, EPI_ISL_2178060                                                                                                                                                                                                                                                                                                                                                                                                                                                                                                                            | Department of Virus and Microbiological Special Diagnostics, Statens Serum Institut, Copenhagen, Denmark                                                                 | Aalborg University                                                                                                                                    | Danish Covid-19 Genome Consortium                                                                                                                                                                                                                                                                                                                                                                                                                |
| EPI_ISL_757470, EPI_ISL_757974                                                                                                                                                                                                                                                                                                                                                                                                                                                                                                                              | Department of Virus and Microbiological Special Diagnostics, Statens Serum Institut, Copenhagen, Denmark                                                                 | Albertsen Lab, Department of Chemistry and Bioscience, Aalborg University, Denmark                                                                    | Danish Covid-19 Genome Consortium                                                                                                                                                                                                                                                                                                                                                                                                                |
| EPI_ISL_615676, EPI_ISL_618102, EPI_ISL_618354, EPI_ISL_618355, EPI_ISL_618356                                                                                                                                                                                                                                                                                                                                                                                                                                                                              | Department of Virus and Microbiological Special Diagnostics, Statens Serum Institut, Denmark                                                                             | Albertsen lab, Department of Chemistry and Bioscience, Aalborg University, Denmark                                                                    | Danish Covid-19 Genome Consortia                                                                                                                                                                                                                                                                                                                                                                                                                 |
| EPI_ISL_2400054, EPI_ISL_2491413                                                                                                                                                                                                                                                                                                                                                                                                                                                                                                                            | Dept. of Medical Microbiology, Stavanger University Hospital, Helse Stavanger HF                                                                                         | Norwegian Institute of Public Health, Department of Virology                                                                                          | Atiya R Ali; Debech Nadia; Engebretsen Serina Beate; Garcia Llorente Ignacio; Hilde Elshaug; Hilde Vollan; Jon Bråte; Kamilla Heddeland Instefjord; Karoline Bragstad; Kathrine Stene-Johansen; Line Victoria Moen; Marie Paulsen Madsen; Olav Hungnes; Pedersen Benedikte Nevjen; Rasmus Riis Kopperud                                                                                                                                          |
| EPI_ISL_2171041                                                                                                                                                                                                                                                                                                                                                                                                                                                                                                                                             | Dhulikhel Hospital, Kathmandu University Hospital                                                                                                                        | Molecular and Genomics Research Lab, Dhulikhel Hospital, Kathmandu University Hospital                                                                | Dipesh Tamrakar; Manu Vanaerschot; Meghnath Dhimal; Navin Adhikari; Nishan Katuwal; Pradip Gyanwali; Rajeev Shrestha; Saroj Bhattarai; Surendra Kumar Madhup                                                                                                                                                                                                                                                                                     |
| EPI_ISL_2101017                                                                                                                                                                                                                                                                                                                                                                                                                                                                                                                                             | Diagnostic Laboratory-Microbiology                                                                                                                                       | Biomedical Laboratory-2                                                                                                                               | A. Dharshan De Silva; Dilini Nakkawita; Dumitha Govindapala; Harshi Abeygoonawardena; Himali S. Jayasinghearachchi; Pawani Gamage; Priyamali Jayasekera; Thamarasi Senaratne; Upeksha Kulasekera                                                                                                                                                                                                                                                 |
| EPI_ISL_1533077                                                                                                                                                                                                                                                                                                                                                                                                                                                                                                                                             | Diagnostic and Research Center of Infectious Diseases, Medical Faculty, Andalas University                                                                               | Diagnostic and Research Center of Infectious Diseases, Medical Faculty, Andalas University                                                            | Andani Eka Putra; Ayu Novita Trisnawati; Dede Rahman Agustian; Desmawati; Dessy Arisanty; Fauzul Azhim; Gestina Alisha; Ikhwani R. Sudji; Juane Plantika Menra; Linosefa; Mutia Lailani; Nia Ayuni Putri; Nita Afriani; SM Rezki; Sekar Asri Tresnaningtyas; Siskalil Fahma; Syarifzayanti; Syandrez Prima Putra; Yolani Syaputri                                                                                                                |
| EPI_ISL_2423458, EPI_ISL_2423485                                                                                                                                                                                                                                                                                                                                                                                                                                                                                                                            | Diagnostyka, Laboratoria Medyczne.                                                                                                                                       | 1. ViroGenetics - BSL3 Laboratory of Virology, Malopolska Centre of Biotechnology, Jagiellonian University; 2. Diagnoston Laboratoria Lukasz Rabalski | Gromowski, T.; Kowalski, M.; Labaj; Maciej Kosinski; Mazur-Panasiuk, N.; Natalia Derewonko; P.P.; Pyrc, K.; Rabalski L.; Rogalska-Kupiec M.; Swadzba J.; Sylwia Januszczyk; Szulc, P.; Wydmanski, W.                                                                                                                                                                                                                                             |
| EPI_ISL_2230062                                                                                                                                                                                                                                                                                                                                                                                                                                                                                                                                             | Dimedical                                                                                                                                                                | 1. National Institute of Public Health - National Institute of Hygiene; 2. Eurofins Genomics Europe Sequencing GmbH                                   | ECDC COVID-19 WGS support team; Eurofins Genomics Europe Sequencing Team; Gierczyński Rafat; Sadkowska-Todys Malgorzata; Wolkowicz Tomasz; Zacharczuk Katarzyna                                                                                                                                                                                                                                                                                  |
| EPI_ISL_1007655, EPI_ISL_1936582, EPI_ISL_1936583, EPI_ISL_2161137, EPI_ISL_2361092, EPI_ISL_2361097, EPI_ISL_2361253, EPI_ISL_2710499                                                                                                                                                                                                                                                                                                                                                                                                                      | see above                                                                                                                                                                | Division of Emerging Infectious Diseases, Bureau of Infectious Diseases Diagnosis Control, Korea Disease Control and Prevention Agency                | Ae Kyung Park; Chae Young Lee; Eun-Jin Kim; Heui Man Kim; Il-Hwan Kim; Jeong-Ah Kim; Jeong-Min Kim; Jin Sun No; Namjoo Lee; Sang Hee Woo                                                                                                                                                                                                                                                                                                         |
| EPI_ISL_2695849, EPI_ISL_2695860, EPI_ISL_2695870, EPI_ISL_2695871, EPI_ISL_2695873, EPI_ISL_2695874                                                                                                                                                                                                                                                                                                                                                                                                                                                        | Division of Medical Virology, National Health Laboratory Service (NHLS), Tygerberg Hospital / Stellenbosch University                                                    | Division of Medical Virology, National Health Laboratory Service (NHLS), Tygerberg Hospital / Stellenbosch University                                 | Bronwyn Kleinhans; Gert van Zyl; San Emmanuel James; Susan Engelbrecht; Tania Stander; Tongai Maponga; Tulio de Oliveira; Wolfgang Preiser                                                                                                                                                                                                                                                                                                       |
| EPI_ISL_1591434, EPI_ISL_3066391, EPI_ISL_3066514, EPI_ISL_3068096                                                                                                                                                                                                                                                                                                                                                                                                                                                                                          | Division of Medical Virology, National Health Laboratory Service (NHLS), Tygerberg Hospital / Stellenbosch University                                                    | Division of Medical Virology, Stellenbosch University and NHLS Tygerberg Hospital                                                                     | Bronwyn Kleinhans; Gert van Zyl; Kayla Delaney; Menzi Nkosi; Susan Engelbrecht; Wolfgang Preiser                                                                                                                                                                                                                                                                                                                                                 |
| EPI_ISL_426187, EPI_ISL_497962                                                                                                                                                                                                                                                                                                                                                                                                                                                                                                                              | Division of Viral Diseases, Center for Laboratory Control of Infectious Diseases, Korea Centers for Diseases Control and Prevention                                      | Division of Viral Diseases, Center for Laboratory Control of Infectious Diseases, Korea Centers for Diseases Control and Prevention                   | Heui Man Kim; Hye-Jun Jo; Jeong-Min Kim; Jun-Sub Kim; Junhyeong Jang; Mi-Seon Kim; Myung Guk Han; Namjoo Lee; Sang Hee Woo; Sehee Park; Yoon-Seok Chung                                                                                                                                                                                                                                                                                          |
| EPI_ISL_460681, EPI_ISL_523013, EPI_ISL_523755, EPI_ISL_801441, EPI_ISL_801442, EPI_ISL_2145550, EPI_ISL_2154193                                                                                                                                                                                                                                                                                                                                                                                                                                            | see above                                                                                                                                                                | Dutch COVID-19 response team                                                                                                                          | Erasmus Medical Center                                                                                                                                                                                                                                                                                                                                                                                                                           |
| EPI_ISL_547453, EPI_ISL_547478, EPI_ISL_943477, EPI_ISL_1014550, EPI_ISL_1232433, EPI_ISL_1595983, EPI_ISL_1704943, EPI_ISL_1705929, EPI_ISL_1706084, EPI_ISL_1792360, EPI_ISL_1792865, EPI_ISL_1792896, EPI_ISL_1962005, EPI_ISL_1962940, EPI_ISL_1962944, EPI_ISL_2093544, EPI_ISL_2093798, EPI_ISL_2094340, EPI_ISL_2094357, EPI_ISL_2094395, EPI_ISL_2094396, EPI_ISL_2302173, EPI_ISL_2302971, EPI_ISL_2303931, EPI_ISL_2303970, EPI_ISL_2303978, EPI_ISL_2405481, EPI_ISL_2405597, EPI_ISL_2405620, EPI_ISL_2476313, EPI_ISL_2609622, EPI_ISL_2610186 | see above                                                                                                                                                                | Dutch COVID-19 response team                                                                                                                          | National Institute for Public Health and the Environment (RIVM)                                                                                                                                                                                                                                                                                                                                                                                  |
| EPI_ISL_2621147                                                                                                                                                                                                                                                                                                                                                                                                                                                                                                                                             | Dysselorsorp Clinic wc DDC                                                                                                                                               | NHLS/UCT                                                                                                                                              | Adam Meijer; AnneMarie van den Brandt; Annelies Kroneman; Bas van der Veer; Chantal Reusken; Dennis Schmitz; Dirk Eggink; Eunice Then; Florian Zwagemaker; Harry Vennema; James Groot; Jeroen Cremer; Jolienke Hardeman; Karim Hajji; Kim Freniks; Linda van de Nes; Lisa Wijsman; Lynn Aarts; Melissa van Tuil; Robert Kohl; Rynanne Jaarsma; Sanne Bos; Sharon van den Brink; Sjoerd Kuiling; on behalf of the national COVID-19 response team |
| EPI_ISL_2230399                                                                                                                                                                                                                                                                                                                                                                                                                                                                                                                                             | Dzial Diagnostyki Laboratoryjnej SFZOZ                                                                                                                                   | 1. National Institute of Public Health - National Institute of Hygiene; 2. Eurofins Genomics Europe Sequencing GmbH                                   | Arash Iranzadeh; Bruna Galvao; Carolyn Williamson; Deelan Doolabh; Diana Hardie; Gert Marais; Innocent Mudau; Lynn Tyers; Marvin Hsiao; Stephen Korsman                                                                                                                                                                                                                                                                                          |
| EPI_ISL_512313                                                                                                                                                                                                                                                                                                                                                                                                                                                                                                                                              | E. Gulbja Laboratorija                                                                                                                                                   | Latvian Biomedical Research and Study Centre                                                                                                          | ECDC COVID-19 WGS support team; Eurofins Genomics Europe Sequencing Team; Gierczyński Rafat; Sadkowska-Todys Malgorzata; Wolkowicz Tomasz; Zacharczuk Katarzyna                                                                                                                                                                                                                                                                                  |
| EPI_ISL_1312414                                                                                                                                                                                                                                                                                                                                                                                                                                                                                                                                             | E. Gulbja laboratorija                                                                                                                                                   | Latvian Biomedical Research and Study Centre                                                                                                          | Dmitrijs Perminovs; Ivars Silamiķelis; Jānis Kloviņš; Kaspars Megnis; Mikus Gavars; Monta Ustinova; Uga Dumpis; Vita Rovīte; Nikita Zrelovs                                                                                                                                                                                                                                                                                                      |
| EPI_ISL_1696047                                                                                                                                                                                                                                                                                                                                                                                                                                                                                                                                             | E.F.S B.F.C JEAN MINJOZ                                                                                                                                                  | Department of Virology, Henri Mondor University Hospital, Assistance Publique Hôpitaux de Paris, Université Paris-Est Créteil, INSERM U955            | Alexandre Soulier; Christophe Rodriguez; Elisabeth Trauwins; Guillaume Gricourt; Jean-Michel Pawlowsky; Melissa N'Debi; Slim Fourati; Vanessa Demontant                                                                                                                                                                                                                                                                                          |
| EPI_ISL_2359398                                                                                                                                                                                                                                                                                                                                                                                                                                                                                                                                             | EHNV                                                                                                                                                                     | Laboratory of genomics and metagenomics                                                                                                               | Claire Bertelli; Damien Jacot; Gilbert Greub; Sébastien Aebys; Trestan Pillonel                                                                                                                                                                                                                                                                                                                                                                  |
| EPI_ISL_2370853                                                                                                                                                                                                                                                                                                                                                                                                                                                                                                                                             | ETHNIKO KENTRO AIMODOSIAS E.K.E.A.                                                                                                                                       | Greek Genome Center, Biomedical Research Foundation of the Academy of Athens (BRFAA)                                                                  | Dimitrios Thanos; Eftimia Petinaki; Emmanouil Athanasiadis; Giannis Vatsellas; Katerina Zoi; Kostas Stamoulis; Theodoros Loupis                                                                                                                                                                                                                                                                                                                  |
| EPI_ISL_2447785                                                                                                                                                                                                                                                                                                                                                                                                                                                                                                                                             | East London Laboratory                                                                                                                                                   | National Institute for Communicable Diseases of the National Health Laboratory Service                                                                | Amoako DG; Bhiman JN; Ismail A; Mahlangu B; Mohale T; Ntuli N; Scheepers C                                                                                                                                                                                                                                                                                                                                                                       |
| EPI_ISL_2479322, EPI_ISL_2940897, EPI_ISL_2941304                                                                                                                                                                                                                                                                                                                                                                                                                                                                                                           | Edmonton Provincial Lab                                                                                                                                                  | Public Health Agency of Canada (PHAC) National Microbiology Laboratory                                                                                | Buss; Croxen M; Deo A; Dieu P; E; Ferrato C; Gill K; Khan F; Koleva P; Li V; Lloyd C; Lynch T; Ma R; Murphy S; Pabbaraju K; Shokoples S; Thayer J; Tipples G; Whitehouse M; Wong A; Yu C; Zelyas N                                                                                                                                                                                                                                               |
| EPI_ISL_2029260                                                                                                                                                                                                                                                                                                                                                                                                                                                                                                                                             | Ekstralab Tuzla                                                                                                                                                          | Alea Genetic Centre                                                                                                                                   | Adis Kandic; Dino Pecar; Enis Kandic; Lana Salihefendic; Nusret Butkovic; Rijad Konjhodzic                                                                                                                                                                                                                                                                                                                                                       |
| EPI_ISL_2086267                                                                                                                                                                                                                                                                                                                                                                                                                                                                                                                                             | Enthabeni Lancet Laboratories                                                                                                                                            | KRISP, KZN Research Innovation and Sequencing Platform                                                                                                | Emmanuel SJ; Gandhari J; Khan S; Lessells R; Mdlalose K; Naidoo Y; Pillay S; Ramphal U; Tegally H; Wilkinson E; York D; de Oliveira T                                                                                                                                                                                                                                                                                                            |
| EPI_ISL_640064                                                                                                                                                                                                                                                                                                                                                                                                                                                                                                                                              | Ethembeni Clinic (Prieska)                                                                                                                                               | NHLS/UCT                                                                                                                                              | Arash Iranzadeh; Bruna Galvao; Carolyn Williamson; Deelan Doolabh; Diana Hardie; Innocent Mudau; Kruger Marais; Lynn Tyers; Marvin Hsiao; Stephen Korsman                                                                                                                                                                                                                                                                                        |
| EPI_ISL_1897644, EPI_ISL_1897648, EPI_ISL_1897884, EPI_ISL_2241494, EPI_ISL_2241622, EPI_ISL_2241623                                                                                                                                                                                                                                                                                                                                                                                                                                                        | Ethiopian Biotechnology Institute (EBTI)                                                                                                                                 | International Centre for Genetic Engineering and Biotechnology (ICGEB) and ARGO Open Lab for Genome Sequencing                                        | Alessandro Marcello; Danilo Licastro; Emanuele Orsini; Getnet Hailu; Hailu Dadi; Kassahun Tesfaye; Keyru Tuki; Kominist Asmamaw; Molalegne Bitew; Simeone Dal Monego; Yakob Gebregziabher Tsegay                                                                                                                                                                                                                                                 |
| EPI_ISL_1712273                                                                                                                                                                                                                                                                                                                                                                                                                                                                                                                                             | FSBI «NATIONAL MEDICAL RESEARCH CENTER FOR OBSTETRICS, GYNECOLOGY AND PERINATOLOGY NAMED AFTER ACADEMICIAN V.I.KULAKOV» MINISTRY OF HEALTHCARE OF THE RUSSIAN FEDERATION | Center for Precision Genome Editing and Genetic Technologies for Biomedicine, Pirogov Medical University, Moscow, Russian Federation                  | Anastasia Shut; Andrey Krivoy; Dmitriy Korostin; Margarita Korzhanova; Vera Belova; Yegor Botsmanov                                                                                                                                                                                                                                                                                                                                              |



|                                                                                                                                                                                                                                                                                                                                  |                                                                                                              |                                                                                                                                                                                                                            |                                                                                                                                                                                                                                                                                                                                                                                                                                                                                                                                                                                                                                                                                                                                                                                                                                                                                                                                            |
|----------------------------------------------------------------------------------------------------------------------------------------------------------------------------------------------------------------------------------------------------------------------------------------------------------------------------------|--------------------------------------------------------------------------------------------------------------|----------------------------------------------------------------------------------------------------------------------------------------------------------------------------------------------------------------------------|--------------------------------------------------------------------------------------------------------------------------------------------------------------------------------------------------------------------------------------------------------------------------------------------------------------------------------------------------------------------------------------------------------------------------------------------------------------------------------------------------------------------------------------------------------------------------------------------------------------------------------------------------------------------------------------------------------------------------------------------------------------------------------------------------------------------------------------------------------------------------------------------------------------------------------------------|
| EPI_ISL_1273098                                                                                                                                                                                                                                                                                                                  | Faculty of Medicine, Al-Quds University                                                                      | Faculty of Medicine, Al-Quds University                                                                                                                                                                                    | Al-Jawabreh, A.; Dumaldi, K.; Ereqat, S.; Nasereddin, A.                                                                                                                                                                                                                                                                                                                                                                                                                                                                                                                                                                                                                                                                                                                                                                                                                                                                                   |
| EPI_ISL_2382403                                                                                                                                                                                                                                                                                                                  | FarmaLab Indoutama Halim                                                                                     | National Institute of Health Research and Development                                                                                                                                                                      | Arie Ardiansyah Nugraha; Hana Apsari Pawestri; Hartanti Dian Ikawati; Kartika Dewi Puspa; Krisna Pangesti; Nelly Puspandari; Subangkit; Triyani Soekarso; Vivi Setiawaty                                                                                                                                                                                                                                                                                                                                                                                                                                                                                                                                                                                                                                                                                                                                                                   |
| EPI_ISL_451966                                                                                                                                                                                                                                                                                                                   | Federal Budget Institution of Science, State Research Center for Applied Microbiology & Biotechnology        | Federal Budget Institution of Science, State Research Center for Applied Microbiology & Biotechnology                                                                                                                      | Abaimova A; Bakhteeva I; Bagodatskikh S; Bogun A; Borzilov A; Chekan L; Chernysh S; Denisenko E; Dentovskaya S; Detushev K; Dyatlov I; Firstova V; Frolov V; Fursov M; Fursova N; Galkina E; Gapelchenkova T; Goncharova J; Gorbatov A; Hlyntseva A; Ivanov S; Kalmantayev T; Kalimantayeva O; Kanashenko M; Kartsev N; Kartseva A; Khomyakov A; Khranov M; Kislichkina A; Kolchanova A; Koroleva-Ushakova A; Kosilova I; Kraslinikova E; Kuzin V; Kuzina E; Makarova M; Marin M; Novikova T; Platonov M; Podkopaev Y; Ryabko A; Shaikhutdinova R; Shemyakin I; Shishkina L; Silkina M; Sizova A; Skryabin Y; Slukin P; Slukina N; Solomentsev V; Solovieva A; Teymurazov M; Timofeev V; Titareva G; Trunyakova A; Tyurin E; Vagayskaya A; Zeninskaya N; Zhumakae R                                                                                                                                                                        |
| EPI_ISL_2508043                                                                                                                                                                                                                                                                                                                  | Fimlab Laboratoriot Oy Tampere                                                                               | Expert Microbiology, National Institute for Health and Welfare                                                                                                                                                             | Carita Savolainen-Kopra; Erika Lindh; Haider Al-Hello; Jani Halkilahti; Kirsi Liitsola; Niina Ikonen; Olli Vapalahti; Pekka Ellonen; Phuoc Truong; Päivi Laurila; Ravi Kant; Sari Hannula; Soile Blomqvist; Teemu Smura                                                                                                                                                                                                                                                                                                                                                                                                                                                                                                                                                                                                                                                                                                                    |
| EPI_ISL_2860230                                                                                                                                                                                                                                                                                                                  | First Aide Diagnostic Center                                                                                 | Philippine Genome Center                                                                                                                                                                                                   | Alethea R. de Guzman; Anna Ong-Lim; Arienne A. Zamora; Benedict A. Maralit; Carlo M. Lapid; Celia Carlos; Devon Ray Pacial; Diomedes A. Carino; Edsel Maurice Salvaña; El King D. Morado; Elcid Aaron R. Pangilinan; Eva Maria Cutiongo-de la Paz; Francis A. Tablizo; Henrietta Marie Rodriguez; Jaime C. Montoya; Jan Michael C. Yap; Jarvin E. Nipales; Jo-Hannah S. Llamas; John Q. Wong; Joshua Gregor A. Dizon; Juan Antonio R. Magalang; Karol Sophia Agape R. Padilla; Kenneth M. Kim; Kris P. Punayan; Krisitna Patriz Dela Cruz; Lindsay Claire D.L. Carandang; Ma. Exanil Plantig; Marc Edsel C. Ayes; Maria Rosario Singh-Vergeire and Cynthia P. Saloma; Maria Sofia L. Yangzon; Marielle M Gamboa; Marissa Alejandria; Nina Francesca Bustamante; Razel Nikka M. Hao; Renato Jacinto Q. Mantaring; Rianna Patricia S. Cruz; Sheila Mae M. Araiza; Yvonne Valerie Austria; Zipporah Mariebelle R. Enriquez; Zyrel V. Mollejon |
| EPI_ISL_2889849, EPI_ISL_2889850                                                                                                                                                                                                                                                                                                 | Fondation Congolaise pour la recherche medicale (FCRM)                                                       | Fondation Congolaise pour la Recherche Médicale                                                                                                                                                                            | Abel Lissom; Batchi-Bouyou Armel Landry; Francine Ntoumi; Mfoutou Mampangy Claujens Chastel; Thirumalaisamy P. Velavan                                                                                                                                                                                                                                                                                                                                                                                                                                                                                                                                                                                                                                                                                                                                                                                                                     |
| EPI_ISL_581487                                                                                                                                                                                                                                                                                                                   | Fondation Congolaise pour la recherche medicale (FCRM)                                                       | NGS Competence Center Tübingen, Institut für Medizinische Mikrobiologie und Hygiene, Universitätsklinikum Tübingen                                                                                                         | Angel Angelov                                                                                                                                                                                                                                                                                                                                                                                                                                                                                                                                                                                                                                                                                                                                                                                                                                                                                                                              |
| EPI_ISL_3342566, EPI_ISL_3342568                                                                                                                                                                                                                                                                                                 | Fondation Congolaise pour la recherche medicale (FCRM), Francine Ntoumi                                      | Fondation Congolaise pour la Recherche Médicale                                                                                                                                                                            | Batchi-Bouyou Armel Landry; Dr. Abel Lissom; Dr. Jean Claude Djontu; Mfoutou Mampangy Claujens Chastel; Prof. Dr. Thirumalaisamy P. Velavan; Prof. Francine Ntoumi                                                                                                                                                                                                                                                                                                                                                                                                                                                                                                                                                                                                                                                                                                                                                                         |
| EPI_ISL_1854772                                                                                                                                                                                                                                                                                                                  | Fondation Congolaise pour la recherche medicale (FCRM), Francine Ntoumi                                      | Institute of Tropical Medicine                                                                                                                                                                                             | Mfoutou Mampangy Claujeans Chastel and Batchi-Bouyou Armel Landry; Prof. Dr. Thirumalaisamy P. Velavan; Prof. Francine Ntoumi                                                                                                                                                                                                                                                                                                                                                                                                                                                                                                                                                                                                                                                                                                                                                                                                              |
| EPI_ISL_912365                                                                                                                                                                                                                                                                                                                   | Fondation Congolaise pour la recherche medicale (FCRM), Francine Ntoumi                                      | NGS Competence Center Tuebingen, Institut für Medizinische Mikrobiologie und Hygiene, Universitaetsklinikum Tübingen                                                                                                       | Angel Angelov                                                                                                                                                                                                                                                                                                                                                                                                                                                                                                                                                                                                                                                                                                                                                                                                                                                                                                                              |
| EPI_ISL_2620946                                                                                                                                                                                                                                                                                                                  | Fondazione IRCCS Ca' Granda Ospedale Maggiore Policlinico                                                    | Fondazione IRCCS Ca' Granda Ospedale Maggiore Policlinico                                                                                                                                                                  | Ferruccio Cieriotti; Sara Uceda Renteria                                                                                                                                                                                                                                                                                                                                                                                                                                                                                                                                                                                                                                                                                                                                                                                                                                                                                                   |
| EPI_ISL_1469585                                                                                                                                                                                                                                                                                                                  | Fundação Hospitalar de Sapucaia do Sul                                                                       | Epiclin                                                                                                                                                                                                                    | Ana Paula Mutterle; Carolina Comerlato; Eliana Márcia Da Ros Wendland; Fernando Hayashi Sant'Anna; Janira Prichula; Juliana Comerlato                                                                                                                                                                                                                                                                                                                                                                                                                                                                                                                                                                                                                                                                                                                                                                                                      |
| EPI_ISL_493369, EPI_ISL_1828957, EPI_ISL_1828958                                                                                                                                                                                                                                                                                 | Furst Medical Laboratory                                                                                     | Norwegian Institute of Public Health, Department of Virology                                                                                                                                                               | Atiya R Ali; Debec Nadia; Engebretsen Serina Beate; Garcia Llorente Ignacio; Hilde Elshaug; Hilde Vollan; Jon Bråte; Kamilla Heddeland Instefjord; Karoline Bragstad; Kathrine Stene-Johansen; Marie Paulsen Madsen; Olav Hungnes; Pedersen Benedikte Nevjen; Rasmus Riis Kopperud                                                                                                                                                                                                                                                                                                                                                                                                                                                                                                                                                                                                                                                         |
| EPI_ISL_1110194, EPI_ISL_1110195, EPI_ISL_1110196, EPI_ISL_1110197, EPI_ISL_1110198, EPI_ISL_1672700, EPI_ISL_1672744, EPI_ISL_1672745, EPI_ISL_1672746, EPI_ISL_1672747, EPI_ISL_1672748, EPI_ISL_1672749, EPI_ISL_1706618, EPI_ISL_1706658, EPI_ISL_1706661                                                                    | see above                                                                                                    | Department of Virology, Henri Mondor University Hospital, Assistance Publique Hôpitaux de Paris, Université Paris-Est Créteil, INSERM U955                                                                                 | Alexandre Soulier; Christophe Rodriguez; Elisabeth Trawinski; Guillaume Gricourt; Jean-Michel Pawlitsky; Melissa N'Debi; Slim Fourati; Vanessa Demontant                                                                                                                                                                                                                                                                                                                                                                                                                                                                                                                                                                                                                                                                                                                                                                                   |
| EPI_ISL_1672460, EPI_ISL_1672547, EPI_ISL_1755046, EPI_ISL_2179448, EPI_ISL_2259268                                                                                                                                                                                                                                              | GH A.CHENEVIER-H.MONDOR                                                                                      | Department of Virology, Henri Mondor University Hospital, Assistance Publique Hôpitaux de Paris, Université Paris-Est Créteil, INSERM U955                                                                                 | Alexandre Soulier; Christophe Rodriguez; Elisabeth Trawinski; Guillaume Gricourt; Jean-Michel Pawlitsky; Melissa N'Debi; Slim Fourati; Vanessa Demontant                                                                                                                                                                                                                                                                                                                                                                                                                                                                                                                                                                                                                                                                                                                                                                                   |
| EPI_ISL_1672499                                                                                                                                                                                                                                                                                                                  | GH JOFFRE DUPUYTREN                                                                                          | Department of Virology, Henri Mondor University Hospital, Assistance Publique Hôpitaux de Paris, Université Paris-Est Créteil, INSERM U955                                                                                 | Alexandre Soulier; Christophe Rodriguez; Elisabeth Trawinski; Guillaume Gricourt; Jean-Michel Pawlitsky; Melissa N'Debi; Slim Fourati; Vanessa Demontant                                                                                                                                                                                                                                                                                                                                                                                                                                                                                                                                                                                                                                                                                                                                                                                   |
| EPI_ISL_2179373, EPI_ISL_2179569, EPI_ISL_2179569, EPI_ISL_2179576                                                                                                                                                                                                                                                               | GH de l'Est Francilien                                                                                       | Department of Virology, Henri Mondor University Hospital, Assistance Publique Hôpitaux de Paris, Université Paris-Est Créteil, INSERM U955                                                                                 | Alexandre Soulier; Christophe Rodriguez; Elisabeth Trawinski; Guillaume Gricourt; Jean-Michel Pawlitsky; Melissa N'Debi; Slim Fourati; Vanessa Demontant                                                                                                                                                                                                                                                                                                                                                                                                                                                                                                                                                                                                                                                                                                                                                                                   |
| EPI_ISL_2779303                                                                                                                                                                                                                                                                                                                  | GK Prison Busia (Matayo)Matayos Prison                                                                       | USAMRD-A, Basic Science Laboratory                                                                                                                                                                                         | Alan Lemtudo; Beth Mutai; Brian Andika; Carol Kifude; Clement Masakwe; Eric Muthanje; Esther Omuseni; Faith Sigei; Gathii Kimita; George Awinda; John Waitumbi; Josphat Nyataya; Rachel Githii; Rehema Liyai; Stephen Ochola                                                                                                                                                                                                                                                                                                                                                                                                                                                                                                                                                                                                                                                                                                               |
| EPI_ISL_2779388                                                                                                                                                                                                                                                                                                                  | GK Prison Kiambu                                                                                             | USAMRD-A, Basic Science Laboratory                                                                                                                                                                                         | Alan Lemtudo; Beth Mutai; Brian Andika; Carol Kifude; Clement Masakwe; Eric Muthanje; Esther Omuseni; Faith Sigei; Gathii Kimita; George Awinda; John Waitumbi; Josphat Nyataya; Rachel Githii; Rehema Liyai; Stephen Ochola                                                                                                                                                                                                                                                                                                                                                                                                                                                                                                                                                                                                                                                                                                               |
| EPI_ISL_2779315                                                                                                                                                                                                                                                                                                                  | GK Prisons Dispensary Kapsabet                                                                               | USAMRD-A, Basic Science Laboratory                                                                                                                                                                                         | Alan Lemtudo; Beth Mutai; Brian Andika; Carol Kifude; Clement Masakwe; Eric Muthanje; Esther Omuseni; Faith Sigei; Gathii Kimita; George Awinda; John Waitumbi; Josphat Nyataya; Rachel Githii; Rehema Liyai; Stephen Ochola                                                                                                                                                                                                                                                                                                                                                                                                                                                                                                                                                                                                                                                                                                               |
| EPI_ISL_2547341                                                                                                                                                                                                                                                                                                                  | Garies PHC Clinic                                                                                            | National Health Laboratory Service/University of Cape Town (NHLS/UCT)                                                                                                                                                      | Arash Iranzadeh; Bruna Galvaio; Carolyn Williamson; Deelan Doolabh; Diana Hardie; Gert Marais; Innocent Mudau; Lynn Tyers; Marvin Hsiao; Stephen Korsman                                                                                                                                                                                                                                                                                                                                                                                                                                                                                                                                                                                                                                                                                                                                                                                   |
| EPI_ISL_730570, EPI_ISL_984745, EPI_ISL_984749                                                                                                                                                                                                                                                                                   | Gazi University Faculty of Medicine, Medical Virology Laboratory                                             | Gazi University Faculty of Medicine, Medical Virology Laboratory                                                                                                                                                           | Erdem Şahin; Güleendam Bozdayı; Hager Muftah; İşıl Fidan; Kayhan Çağlar; Murat Dizbay; Selin Yiğit; Shaknoza Sarzhanova; Özlem Güzel Tunçcan                                                                                                                                                                                                                                                                                                                                                                                                                                                                                                                                                                                                                                                                                                                                                                                               |
| EPI_ISL_2375920                                                                                                                                                                                                                                                                                                                  | Genadendal Clinic wc GDC                                                                                     | NHLS/UCT                                                                                                                                                                                                                   | Arash Iranzadeh; Bruna Galvaio; Carolyn Williamson; Deelan Doolabh; Diana Hardie; Innocent Mudau; Kruger Marais; Lynn Tyers; Marvin Hsiao; Stephen Korsman                                                                                                                                                                                                                                                                                                                                                                                                                                                                                                                                                                                                                                                                                                                                                                                 |
| EPI_ISL_2681439                                                                                                                                                                                                                                                                                                                  | General Hospital "8th of September"                                                                          | Laboratory of virology and molecular diagnostics, Institute of Public Health                                                                                                                                               | Boshevska G; Janchevska E.; Kuzmanovska M                                                                                                                                                                                                                                                                                                                                                                                                                                                                                                                                                                                                                                                                                                                                                                                                                                                                                                  |
| EPI_ISL_922076                                                                                                                                                                                                                                                                                                                   | General Hospital #Abdulah Nakas" Sarajevo                                                                    | Alea Genetic Centre                                                                                                                                                                                                        | Dino Pecar; Lana Salihefendic; Rijad Konjhodzic; Sead Jazic                                                                                                                                                                                                                                                                                                                                                                                                                                                                                                                                                                                                                                                                                                                                                                                                                                                                                |
| EPI_ISL_677707, EPI_ISL_678252                                                                                                                                                                                                                                                                                                   | General Hospital - Kumanovo                                                                                  | Research Center for Genetic Engineering and Biotechnology "Georgi D. Efremov", Macedonian Academy of Sciences and Arts                                                                                                     | RCGEB - MASA                                                                                                                                                                                                                                                                                                                                                                                                                                                                                                                                                                                                                                                                                                                                                                                                                                                                                                                               |
| EPI_ISL_1971036                                                                                                                                                                                                                                                                                                                  | General Hospital - Struga                                                                                    | Research Center for Genetic Engineering and Biotechnology "Georgi D. Efremov", Macedonian Academy of Sciences and Arts                                                                                                     | Aleksandar J. Dimovski; Dijana Plasheska-Karanfilska; Gjorgji Bozinovski; Milena Jakimovska; Predrag Noveski                                                                                                                                                                                                                                                                                                                                                                                                                                                                                                                                                                                                                                                                                                                                                                                                                               |
| EPI_ISL_406798                                                                                                                                                                                                                                                                                                                   | General Hospital of Central Theater Command of People's Liberation Army of China                             | BGI & Institute of Microbiology, Chinese Academy of Sciences & Shandong First Medical University & Shandong Academy of Medical Sciences & General Hospital of Central Theater Command of People's Liberation Army of China | Weifeng Shi and Zhenghong Hu; Weijun Chen; Yuhai Bi                                                                                                                                                                                                                                                                                                                                                                                                                                                                                                                                                                                                                                                                                                                                                                                                                                                                                        |
| EPI_ISL_1167794, EPI_ISL_1167905, EPI_ISL_2009596, EPI_ISL_2391269, EPI_ISL_2543479, EPI_ISL_2597257                                                                                                                                                                                                                             | Genetica Molecular and Subdepartamento de Virologia ISP Chile                                                | Instituto de Salud Publica de Chile                                                                                                                                                                                        | Andres Castillo; Barbara Parra; Constanza Campano; Gisselle Barra; Jaime Lagos; Javier Tognarelli; Jorge Fernandez; Karen Orostica; Loredana Arata; Patricia Bustos; Rodrigo Fasce; Soledad Ulloa                                                                                                                                                                                                                                                                                                                                                                                                                                                                                                                                                                                                                                                                                                                                          |
| EPI_ISL_735275, EPI_ISL_735312                                                                                                                                                                                                                                                                                                   | Genomic Laboratory (GLAB) (Conjoint lab of Health Directorate of Istanbul and Istanbul Technical University) | Genomic Laboratory (GLAB), Istanbul Technical University                                                                                                                                                                   | Arzu Irvem; Ayse Serra Ozel; Betsi Kose; Gizem Alkurt; Gizem Dinler Doganay; Ilker Karacan; Jale Yildiz; Levent Doganay; Mehtap Aydin; Nihat Bugra Agaoglu; Nilsun Altunalt; Nisan Denizce Can; Ozlem Akgun Dogan; Payam Zolfagharian; Tugba Kizilboga Akgun; Yasemin Kendir Demirkol                                                                                                                                                                                                                                                                                                                                                                                                                                                                                                                                                                                                                                                      |
| EPI_ISL_812784, EPI_ISL_2566467, EPI_ISL_2566468, EPI_ISL_2566470, EPI_ISL_2566473, EPI_ISL_2566474, EPI_ISL_2566477, EPI_ISL_2566478, EPI_ISL_2566481, EPI_ISL_2566485, EPI_ISL_2566486, EPI_ISL_2566490, EPI_ISL_2566506, EPI_ISL_2566507, EPI_ISL_2566509, EPI_ISL_2566510, EPI_ISL_2566512, EPI_ISL_2566513, EPI_ISL_2566514 | see above                                                                                                    | Genomics Program, Children Cancer Hospital                                                                                                                                                                                 | Abdelaziz, H.; Abdo, I.; AboueInaga, S.; Almeldin, A.; Amer, K.; Bakry, U.; Diab, A.; El-Shaqngery, H.; El-Zayat, M.; ElHaddad, A.; ElHalafawy, A.; Elnaqeb, M.; Farawela, H.; Farawyla, H.; Gomaa, C.; Hadad, A.; Halafawy, A.; Hammad, M.; Hassan, R.; Hassan, W.; Hatem, A.; Hossam, M.; Hussein, S.; Ismail, J.; Jalal, D.; Magdeldin, S.; Mansour, T.; Monuir, G.; Saaid, M.; Said, D.; Salah, H.; Samir, O.; Sayed, A.; Shalaby, L.; Soliman, M.; Soliman, M.; Yahaia, A.; shalaby, L.                                                                                                                                                                                                                                                                                                                                                                                                                                               |
| EPI_ISL_2434161                                                                                                                                                                                                                                                                                                                  | Genomik Solidaritas Indonesia Laboratorium                                                                   | Genomik Solidaritas Indonesia Laboratorium                                                                                                                                                                                 | Alfin Mohammad Abdillah; Anindya Pradipta Susanto; Annisa Muthiah Sukirman; Ariel Pradipta; Carissa Sintca Wijaya; Dhahlia Agustina Cahyono; Gracia Felias Enos Korompos; Meutia Ahyupeteri Kumaher; Normastuti Adhini Tantyo; Vania Gavriila Wikasa                                                                                                                                                                                                                                                                                                                                                                                                                                                                                                                                                                                                                                                                                       |
| EPI_ISL_2140696                                                                                                                                                                                                                                                                                                                  | George Hospital wc GRH                                                                                       | NHLS/UCT                                                                                                                                                                                                                   | Arash Iranzadeh; Bruna Galvaio; Carolyn Williamson; Deelan Doolabh; Diana Hardie; Innocent Mudau; Kruger Marais; Lynn Tyers; Marvin Hsiao; Stephen Korsman                                                                                                                                                                                                                                                                                                                                                                                                                                                                                                                                                                                                                                                                                                                                                                                 |
| EPI_ISL_2340207, EPI_ISL_2340210                                                                                                                                                                                                                                                                                                 | Germano de Sousa                                                                                             | Instituto Nacional de Saude (INSA)                                                                                                                                                                                         | Borges et al                                                                                                                                                                                                                                                                                                                                                                                                                                                                                                                                                                                                                                                                                                                                                                                                                                                                                                                               |
| EPI_ISL_1225490, EPI_ISL_1225510, EPI_ISL_1225513, EPI_ISL_1225563, EPI_ISL_1503116                                                                                                                                                                                                                                              | Gorgas Memorial Laboratory of Health Studies                                                                 | Gorgas Memorial Laboratory of Health Studies                                                                                                                                                                               | Adriana Weeden; Alejandra Valoy; Alexander Martinez; Ambar Moreno; Anyuri Ortiz; Brechla Moreno; Castillo Jorge; Claudia Gonzalez; Daniel Castillo; Danilo Franco; Davis Beltran; Dimelza Arauz; Eimelec Valdespino; Franco Danilo; Gonzalez Claudia; Gretel Vasquez; Ilka Guerra; Isela Guerrero; Jessica Gondola; Jim Chang; Juan Miguel Pascale; Layda Abrego; Leyda Abrego; Lisseth Saenz; Lopez-Verges Sandra; Mabel Martinez-Montero; Maria Chen-German; Marlene Castillo; Marlene Castillo; Martinez Alexander; Melissa Gaitan; Moreno Ambar; Moreno Brechla; Oris Chavarria; Ortiz Alma; Rita Corrales; Rita Rodriguez; Sandra Lopez-Verges; Yamiika Diaz; Yaneth Pitti; Zumara Chaverra                                                                                                                                                                                                                                           |
| EPI_ISL_2376850                                                                                                                                                                                                                                                                                                                  | Greek Genome Center, Biomedical                                                                              | Greek Genome Center, Biomedical Research Foundation of the                                                                                                                                                                 | Dimitrios Thanos; Emmanouil Athanasiadis; Giannis Vatsellas; Katerina Zoi; Theodoros Loupis                                                                                                                                                                                                                                                                                                                                                                                                                                                                                                                                                                                                                                                                                                                                                                                                                                                |

|                                                                                                                                                                                                                                                                                | Research Foundation of the Academy of Athens (BRFAA)                                                              | Academy of Athens (BRFAA)                                                                                                                  |                                                                                                                                                                                                                                                                                                                                                                                                                                                                                                                                                                                                                                           |
|--------------------------------------------------------------------------------------------------------------------------------------------------------------------------------------------------------------------------------------------------------------------------------|-------------------------------------------------------------------------------------------------------------------|--------------------------------------------------------------------------------------------------------------------------------------------|-------------------------------------------------------------------------------------------------------------------------------------------------------------------------------------------------------------------------------------------------------------------------------------------------------------------------------------------------------------------------------------------------------------------------------------------------------------------------------------------------------------------------------------------------------------------------------------------------------------------------------------------|
| EPI_ISL_2301819, EPI_ISL_2369746, EPI_ISL_2371337                                                                                                                                                                                                                              | Greek Genome Center, Biomedical Research Foundation of the Academy of Athens (BRFAA)                              | Greek Genome Center, Biomedical Research Foundation of the Academy of Athens (BRFAA)                                                       | Dimitrios Thanos; Emmanouil Athanasiadis; Giannis Vatsellas; Katerina Zoi; Theodoros Loupis                                                                                                                                                                                                                                                                                                                                                                                                                                                                                                                                               |
| EPI_ISL_3207493                                                                                                                                                                                                                                                                | Groote Schuur Hospital wc GSH                                                                                     | NHLS/UCT                                                                                                                                   | Arash Iranzadeh; Bruna Galvao; Carolyn Williamson; Deelan Doolabh; Diana Hardie; Gert Marais; Innocent Mudau; Lynn Tyers; Marvin Hsiao; Rageema Joseph; Sisonke; Stephen Korsman                                                                                                                                                                                                                                                                                                                                                                                                                                                          |
| EPI_ISL_699085                                                                                                                                                                                                                                                                 | Group 42 (G42) Healthcare, Abu Dhabi, United Arab Emirates; Department of Health, The United Arab Emirates        | G42 Healthcare                                                                                                                             | Ashish Koshy; Budoor Alqarni; Denghui Liu; Fang Chen; Hanif Khalik; Huanning Yang; Javier Quilez; Jian Wang; Junhua Li; Ke Liang; Long Lin; Mohammed Saifuddin Fasihuddin; Nan Qiao; Nawal Ahmed Mohamed Al Kaabi; Pauline Ogradzki; Pei Wu; Peng Xiao; Pengjuan Liu; Rong Liu; Sally Mahmoud; Siyang Liu; Stephen S. Francis; Tao Ma; Vinay Kusuma; Walid Abbas Zaher; Weibin Liu; Wenjun He; Xavier Anton; Xin Jin; Xin Meng; Xinyu Huang; Xun Xu; Zhaorong Yuan                                                                                                                                                                        |
| EPI_ISL_1696300, EPI_ISL_1696301                                                                                                                                                                                                                                               | Groupe LCD                                                                                                        | Department of Virology, Henri Mondor University Hospital, Assistance Publique Hôpitaux de Paris, Université Paris-Est Créteil, INSERM U955 | Alexandre Soulier; Christophe Rodriguez; Elisabeth Trawinski; Guillaume Gricourt; Jean-Michel Pawlowsky; Melissa N'Debi; Slim Fourati; Vanessa Demontant                                                                                                                                                                                                                                                                                                                                                                                                                                                                                  |
| EPI_ISL_509701                                                                                                                                                                                                                                                                 | Guatemala Ministry of Public Health                                                                               | Pathogen Discovery, Respiratory Viruses Branch, Division of Viral Diseases, Centers for Disease Control and Prevention                     | Anna Uehara; Clinton Paden; Haibin Wang; Jing Zhang; Krista Queen; Suxiang Tong; Yan Li; Ying Tao                                                                                                                                                                                                                                                                                                                                                                                                                                                                                                                                         |
| EPI_ISL_511406                                                                                                                                                                                                                                                                 | H Braga                                                                                                           | Instituto Nacional de Saude (INSA)                                                                                                         | Borges et al                                                                                                                                                                                                                                                                                                                                                                                                                                                                                                                                                                                                                              |
| EPI_ISL_1853561                                                                                                                                                                                                                                                                | H Fernando Fonseca                                                                                                | Instituto Nacional de Saude (INSA) and Institute of Biomedicine (IBiMed), Universidade de Aveiro                                           | Borges et al                                                                                                                                                                                                                                                                                                                                                                                                                                                                                                                                                                                                                              |
| EPI_ISL_1854262                                                                                                                                                                                                                                                                | H Forcas Armadas - Polo Lisboa                                                                                    | Instituto Nacional de Saude (INSA) and Institute of Biomedicine (IBiMed), Universidade de Aveiro                                           | Borges et al                                                                                                                                                                                                                                                                                                                                                                                                                                                                                                                                                                                                                              |
| EPI_ISL_602380, EPI_ISL_733035, EPI_ISL_733046, EPI_ISL_1491600                                                                                                                                                                                                                | HELIX LLC                                                                                                         | WHO National Influenza Centre Russian Federation                                                                                           | Alexey Masharsky; Andrey Komissarov; Anna Ivanova; Artem Fadeev; Daria Danilenko; Dmitry Bazhenov; Dmitry Lioznov; Elena Nabieva; Georgii Bazynkin; Kseniya Safina; Kseniya Komissarova; Maria Baturova; Maria Pisareva; Maria Timofeeva; Tamila Musaeva; Veronika Eder                                                                                                                                                                                                                                                                                                                                                                   |
| EPI_ISL_1965466, EPI_ISL_1965470                                                                                                                                                                                                                                               | HG Pharma GmbH                                                                                                    | Berghaler laboratory, CeMM Research Center for Molecular Medicine of the Austrian Academy of Sciences                                      | Andreas Berghaler; Anna Schedl; Bekir Erguner; Benedikt Agerer; Christoph Bock; Fabian Amman; Jan Laine; Lukas Endler; Maelle Le Moing; Martin Senekowitsch; Michael Schuster; Petr Triska; Thomas Penz                                                                                                                                                                                                                                                                                                                                                                                                                                   |
| EPI_ISL_2484793                                                                                                                                                                                                                                                                | HOME QUARANTINE TASKFORCE                                                                                         | Hong Kong Department of Health                                                                                                             | Alan K.L. Tsang; Dominic N.C. Tsang; Edman T.K. Lam; Gannon C.K. Mak; Ken H.L. Ng; Peter C.W. Yip; Peter K.C. Cheng; Rickjason C.W. Chan                                                                                                                                                                                                                                                                                                                                                                                                                                                                                                  |
| EPI_ISL_1731504                                                                                                                                                                                                                                                                | HOPITAL DU MONT DORE                                                                                              | CHU Clermont-Ferrand, service de virologie                                                                                                 | Bisseux Maxime; Combes Patricia; Henquell Cécile; Mirand Audrey                                                                                                                                                                                                                                                                                                                                                                                                                                                                                                                                                                           |
| EPI_ISL_1239447                                                                                                                                                                                                                                                                | HOPITAL MARIN HENDAYE                                                                                             | CNR Virus des Infections Respiratoires - France SUD                                                                                        | Antonin Bal; Bruno Lina; Gregory Destras; Gwendolyne Burfin; Hadrien Regue; Laurence Josset; Martine Valette; Quentin Semanas                                                                                                                                                                                                                                                                                                                                                                                                                                                                                                             |
| EPI_ISL_2209295                                                                                                                                                                                                                                                                | HOSP MUN DE MOGI DAS CRUZES PREF WALDEMAR COSTA FILHO                                                             | Instituto Butantan / Mendelics                                                                                                             | Antonio Jorge Martins; Claudia Renata dos Santos Barros; David Schlesinger; Debora Botequijo Moretti; Dimas Tadeu Covas; Elaine Cristina Marqueze; Elaine Vieira Santos; Evandra Strazza Rodrigues; Heidge Fukumasu; Jayme Augusto de Souza-Neto; José Salvatore Leister Patané; Luiz Alcantara; Luiz Lehmann Coutinho; Maria Carolina Elias; Maurício Lacerda Nogueira; Rafael dos Santos Bezerra; Raul Machado Neto; Rejane Maria Tommasini Grotto; Ricardo Haddad; Sandra Coccuzzo Sampaio Vessoni; Simone Kashima; Svetoslav Nanev Slavov; Vincent Louis Viala                                                                        |
| EPI_ISL_1712401                                                                                                                                                                                                                                                                | HOSPITAL CIUDAD NEILY                                                                                             | Incienza, Instituto Costarricense de Investigación y Enseñanza en Nutrición y Salud                                                        | Adriana Godínez; Claudio Soto-Garita; Estela Cordero; Francisco Duarte; Hebleen Porras; Joselyn Prado & Raúl Zeledón-Mayorga; José Luis Vargas; Mariela Gutiérrez; Melany Calderón                                                                                                                                                                                                                                                                                                                                                                                                                                                        |
| EPI_ISL_1067604                                                                                                                                                                                                                                                                | HOSPITAL SAN JUAN DE DIOS                                                                                         | Incienza, Instituto Costarricense de Investigación y Enseñanza en Nutrición y Salud                                                        | Adriana Godínez; Claudio Soto-Garita; Estela Cordero; Francisco Duarte; Hebleen Porras; Melany Calderón & Daniel Cascante-Serrano                                                                                                                                                                                                                                                                                                                                                                                                                                                                                                         |
| EPI_ISL_1510697                                                                                                                                                                                                                                                                | HOSPITAL UNIVERSITARIO INSULAR DE GRAN CANARIA                                                                    | Instituto de Salud Carlos III                                                                                                              | A. Monzón; CRISTOBAL; F. Casas; I. Jiménez; I.DEL ROSARIO QUINTANA; M. Sardonis; P. Zaballos; S. Cuesta; S. Iglesias-Caballero; S. Pozo; S. Varona; V. Camarero; Vázquez-Morón                                                                                                                                                                                                                                                                                                                                                                                                                                                            |
| EPI_ISL_794659                                                                                                                                                                                                                                                                 | HOSPITAL UNIVERSITARIO SAN IGNACIO                                                                                | Instituto Nacional de Salud - Dirección de Investigación en Salud Pública                                                                  | Carlos Franco-Muñoz; Diego A. Álvarez-Díaz; Diego Andrés Prada; Gerardo Santamaría; Jonathan Reales; Julian Naizaque; Katherine Laiton-Donato; Magdalena Wiesner; Marcela Mercado-Reyes; Maria T. Herrera; Martha Lucia Ospina Martinez; Mauricio Pacheco-Montealegre; Paola Muñoz-Laiton; Sheryl Corchuelo                                                                                                                                                                                                                                                                                                                               |
| EPI_ISL_2193525                                                                                                                                                                                                                                                                | Hackensack Medical Center                                                                                         | New York Genome Center                                                                                                                     | Andre Corvelo; Barry Kreiswirth; David Perlin; Dayna M. Oschwald; Jose Mediavilla; Kaelea Composto; Kar Chow; Liang Chen; Marcus Cunningham; Michael Zody; Samantha Fennessey; Tom Maniatis                                                                                                                                                                                                                                                                                                                                                                                                                                               |
| EPI_ISL_700473                                                                                                                                                                                                                                                                 | Heideveld CDC wc HVP                                                                                              | NHLS/UCT                                                                                                                                   | Arash Iranzadeh; Bruna Galvao; Carolyn Williamson; Deelan Doolabh; Diana Hardie; Innocent Mudau; Kruger Marais; Lynn Tyers; Marvin Hsiao; Stephen Korsman                                                                                                                                                                                                                                                                                                                                                                                                                                                                                 |
| EPI_ISL_960153                                                                                                                                                                                                                                                                 | Heideveld Emergency Centre                                                                                        | National Health Laboratory Service/UCT                                                                                                     | Arash Iranzadeh; Bruna Galvao; Carolyn Williamson; Deelan Doolabh; Diana Hardie; Innocent Mudau; Kruger Marais; Lynn Tyers; Marvin Hsiao; Stephen Korsman                                                                                                                                                                                                                                                                                                                                                                                                                                                                                 |
| EPI_ISL_906711, EPI_ISL_906752                                                                                                                                                                                                                                                 | Hematology Laboratory, Section of Molecular Diagnostics, University Clinical Centre, Medical University of Gdansk | Laboratory of Recombinant Vaccines                                                                                                         | Adam Sodal; Aneta Szulc; Anna Piotrowska-Mietelska; Boguslaw Szewczyk; Ewa Mlilos; Izabela Szczygalska; Krystyna Bienkowska-Szewczyk; Krzysztof Lewandowski; Lukasz Rabalski; Maciej Grzybek; Maciej Kosinski; Marlena Robakowska                                                                                                                                                                                                                                                                                                                                                                                                         |
| EPI_ISL_2678300                                                                                                                                                                                                                                                                | HerpeZ                                                                                                            | Institute of Tropical Medicine                                                                                                             | Alimuddin Zumla; Edgar Simulundu; Franklyn Egbe Nkongho; John Tembo; Kangwa Mulonga; Kwitaka Maluzi; Le Thi Kieu Linh; Lloyd Mulenga; Matthew Bates; Moses Chifulya; Nathan Kapata; Prof. Dr. Thirumalaisamy P Velavan; Sivaramakrishna Rachakonda; Sombo Fwoloshi; Srinivas Reddy Pallerla; Victor Mukonka                                                                                                                                                                                                                                                                                                                               |
| EPI_ISL_770024                                                                                                                                                                                                                                                                 | Hle - Asociacion Hogar De Ancianos Santiago Crespo Calvo                                                          | Incienza, Instituto Costarricense de Investigación y Enseñanza en Nutrición y Salud                                                        | Adriana Godínez; Claudio Soto-Garita; Estela Cordero; Francisco Duarte; Hebleen Porras; Melany Calderón & Mariel López                                                                                                                                                                                                                                                                                                                                                                                                                                                                                                                    |
| EPI_ISL_2779330, EPI_ISL_2779346                                                                                                                                                                                                                                               | Homabay County Referral Hospital                                                                                  | USAMRD-A, Basic Science Laboratory                                                                                                         | Alan Lemtudo; Beth Mutai; Brian Andika; Carol Kifude; Clement Masakwe; Eric Muthanje; Esther Omuseni; Faith Sigei; Gathii Kimita; George Awinda; John Waitumbi; Josphat Nyataya; Rachel Githii; Rehema Liyai; Stephen Ochola                                                                                                                                                                                                                                                                                                                                                                                                              |
| EPI_ISL_1196003, EPI_ISL_1196011, EPI_ISL_2547352                                                                                                                                                                                                                              | Homecare                                                                                                          | National Institute for Communicable Diseases of the National Health Laboratory Service                                                     | Amoako DG; Bhiman JN; Ismail A.; Mahlanqu B; Maphalala GP; Mohale T; Ntuli N; Scheepers C                                                                                                                                                                                                                                                                                                                                                                                                                                                                                                                                                 |
| EPI_ISL_2547352                                                                                                                                                                                                                                                                | Hondekripbaai Clinic                                                                                              | National Health Laboratory Service/University of Cape Town (NHLS/UCT)                                                                      | Arash Iranzadeh; Bruna Galvao; Carolyn Williamson; Deelan Doolabh; Diana Hardie; Gert Marais; Innocent Mudau; Lynn Tyers; Marvin Hsiao; Stephen Korsman                                                                                                                                                                                                                                                                                                                                                                                                                                                                                   |
| EPI_ISL_1111061, EPI_ISL_1118883, EPI_ISL_1118898, EPI_ISL_1118899, EPI_ISL_1239371, EPI_ISL_1259284, EPI_ISL_1259293, EPI_ISL_1259299, EPI_ISL_1259300, EPI_ISL_1336334, EPI_ISL_12178465, EPI_ISL_2363514                                                                    | see above                                                                                                         | see above                                                                                                                                  | see above                                                                                                                                                                                                                                                                                                                                                                                                                                                                                                                                                                                                                                 |
| EPI_ISL_1257892                                                                                                                                                                                                                                                                | Hopital Laquintinie de Douala                                                                                     | National Reference Center for Viruses of Respiratory Infections, Institut Pasteur, Paris                                                   | Angela Brisebarre; Camille Capel; Christophe Malabat; Combe Patrice; Corinne Maufrais; Damien Mornico; Ducancellé Alexandra; Ducancellé Alexandra; Etienne Simon-Lorière; Frédéric Lemoine; Louise Lefrançois; Luzy Nelly; Marion Barbet; Martres Pascale; Maud Vanpeene; Méline Bizard; Scanvic Agnès; Sylvie Behillil; Sylvie van der Werf; Vincent Enouf                                                                                                                                                                                                                                                                               |
| EPI_ISL_1381145, EPI_ISL_1381819, EPI_ISL_1381820, EPI_ISL_1381826, EPI_ISL_1443884, EPI_ISL_1517032, EPI_ISL_1582704, EPI_ISL_1582708, EPI_ISL_1583043, EPI_ISL_1622958, EPI_ISL_1623017, EPI_ISL_2178413, EPI_ISL_2178501, EPI_ISL_2178502, EPI_ISL_2188319, EPI_ISL_2188321 | see above                                                                                                         | see above                                                                                                                                  | see above                                                                                                                                                                                                                                                                                                                                                                                                                                                                                                                                                                                                                                 |
| EPI_ISL_2401806                                                                                                                                                                                                                                                                | Hospital Center Emile Mayrisch                                                                                    | National Reference Center for Viruses of Respiratory Infections, Institut Pasteur, Paris                                                   | Adrien Pain; Amaury Vaysse; Angela Brisebarre; Bressollette Céline; Camille Capel; Christophe Malabat; CléMence Guillaume; Corinne Maufrais; CéLine Bressollette; Eric Farfour; Etienne Simon-Lorière; Frédéric Lemoine; Gastil Nabil; Hequet Denise; Jérôme Guinard; Louise Lefrançois; LéA Pilorge; Marion Barbet; Maud Vanpeene; Méline Bizard; Nabil Gastil; Pierre Lechat; Sylvaine Bastian; Sylvie Behillil; Sylvie Van der Werf; Thibault Guioiseau; Vincent Enouf                                                                                                                                                                 |
| EPI_ISL_1384133, EPI_ISL_1384141                                                                                                                                                                                                                                               | Hospital Center Luxembourg                                                                                        | Laboratoire national de sante, Microbiology, Microbial Genomics Platform                                                                   | Anke Wienecke-Baldacchino; Catherine Ragimbeau; Cynthia Oxacelay; Fatu Djabi; Jessica Tapp; Lise Pignon; Raoul Salmon; Tamir Abdelrahman                                                                                                                                                                                                                                                                                                                                                                                                                                                                                                  |
| EPI_ISL_2965569, EPI_ISL_2965583, EPI_ISL_2965585                                                                                                                                                                                                                              | Hospital Español                                                                                                  | Laboratoire national de sante, Microbiology, Microbial Genomics Platform                                                                   | Anke Wienecke-Baldacchino; Catherine Ragimbeau; Fatu Djabi; Jean-Hugues Francois; Jessica Tapp; Lise Pignon; Michel Kohnen; Raoul Salmon; Tamir Abdelrahman                                                                                                                                                                                                                                                                                                                                                                                                                                                                               |
| EPI_ISL_1647957, EPI_ISL_2483973                                                                                                                                                                                                                                               | Hospital General Universitario Gregorio Marañón                                                                   | Centro de Innovación en Vigilancia Epidemiológica (CIVE), Institut Pasteur Montevideo, Uruguay                                             | Alicia Costáble; Alvaro Fajardo; Ana Moller; Andrés Lizaosain; Belén González; Bernardina Rivera; Cecilia Alonso; Cecilia Salazar; Gonzalo Bello; Gonzalo Moratorio; Gregorio Iraola; Henry Albornoz; Ignacio Ferrás; Javier Hurtado; Juan Zanetti; Julio Medina; Luciana Griffero; Lucía Spangenberg; Ma Noel Bentancor; Ma Pia Techera; Malien Arteo; Martina Alonso; Matias Maidana; Mauricio Méndez; Melissa Duquía; Mercedes Paz; Natalia Rego; Natalia Reyes; Nicolas Nin; Odhile Chappos; Paula Perbolianachis; Pilar Moreno; Rodney Colina; Rodrigo Arce; Tamara Fernández-Calero; Tania Possi; Veronica Noya; Viviana Bortagaray |
| EPI_ISL_539496                                                                                                                                                                                                                                                                 | Hospital Nostra Senyora de Meritxell                                                                              | Hospital General Universitario Gregorio Marañón                                                                                            | Cristina Rodriguez-Grande; Darío García de Viedma; Julia Suárez; Laura Pérez-Lago; Marta Herranz Martin; Patricia Muñoz; Pedro Sola Campoy; Pilar Catalán; Sergio Buenestado Soriano; Victor Manuel de la Cueva                                                                                                                                                                                                                                                                                                                                                                                                                           |
| EPI_ISL_2516574                                                                                                                                                                                                                                                                | Hospital Universitari Bellvitge                                                                                   | Instituto de Salud Carlos III                                                                                                              | A. Monzón; F. Casas; F. Fernández; I. I. Jiménez; Iglesias-Caballero; M. Camarero; M. Cuesta; M. González-Esguevillas; M. Molinero Calamita; M. Zaballos; P. Jiménez; S. Juliá; S. Pozo; S. Varona                                                                                                                                                                                                                                                                                                                                                                                                                                        |
| EPI_ISL_819339, EPI_ISL_2162246                                                                                                                                                                                                                                                | Hospital Universitari Vall d'Hebron - Vall d'Hebron Institut de Recerca                                           | Microbiology Department                                                                                                                    | Aida González-Díaz; Carmen Ardanuy; Jordi Camarg; Jordi Niubó; Laura Calatayud; M Angeles Dominguez; Miguel Fernandez-Huerta; Sara Marti                                                                                                                                                                                                                                                                                                                                                                                                                                                                                                  |
| EPI_ISL_2223696, EPI_ISL_2225235                                                                                                                                                                                                                                               | Houston Methodist Hospital                                                                                        | Hospital Universitari Vall d'Hebron - Vall d'Hebron Institut de Recerca                                                                    | Alejandra González-Sánchez; Andrés Antón; Ariadna Rando; Carla Castillo; Cristina Andrés; Damir Garcia-Cehic; Josep F Abril; Josep Quer; Juliana Esperalba; Maria Carmen Martin; Maria Gema Codina; Maria Piñana; Tomàs Pumarola                                                                                                                                                                                                                                                                                                                                                                                                          |
| EPI_ISL_645030                                                                                                                                                                                                                                                                 | Human Genome Variation Research Group, Malopolska Centre of Biotechnology                                         | Houston Methodist Hospital                                                                                                                 | Ilya J. Finkelstein; James J. Davis; Jessica Cambric; Jimmy Gollihar; Kristina Reppand; Layne Pruitt; Madison N. Shyer; Marcus Nguyen; Matthew Ojeda Saavedra; Paul A. Christensen; Prasanti Yerramilli; Randall J. Olsen; Robert Olson; Ryan Gadd; S. Wesley Long; Sishir Subedi; and James M. Musser                                                                                                                                                                                                                                                                                                                                    |
| EPI_ISL_526224, EPI_ISL_526225, EPI_ISL_1041199, EPI_ISL_1041201, EPI_ISL_1041211                                                                                                                                                                                              | Hungarian Defence Forces Military Medical Centre                                                                  | Human Genome Variation Research Group, Malopolska Centre of Biotechnology                                                                  | Botwina, P.; Branicki, W.; Dabrowska, A.; Foremny, J.; Gromowski, T.; Klajmon, A.; Kopera, K.; Kowalski, M.; Labaj; Marszalek, K.; Owczarek, K. P.P.; Pisarek, A.; Pospiech, E.; Pyrc, K.; Sanak, M.; Swadzba, J.; Szczepanski, A.                                                                                                                                                                                                                                                                                                                                                                                                        |
| EPI_ISL_1110181, EPI_ISL_1110207, EPI_ISL_1672676, EPI_ISL_1672679,                                                                                                                                                                                                            | Hôpital Avicenne                                                                                                  | National Laboratory of Virology, Szentágotthai Research Centre                                                                             | Balázs Somogyi; Bálint Eszenyi; Csaba Pereszélynyi; Endre Gábor Tóth; Ferenc Jakab; Gábor Kemenesi; Agnes Balázs-Nagy                                                                                                                                                                                                                                                                                                                                                                                                                                                                                                                     |
|                                                                                                                                                                                                                                                                                |                                                                                                                   | Department of Virology, Henri Mondor University Hospital, Assistance Publique Hôpitaux de Paris, Université Paris-Est Créteil, INSERM U955 | Alexandre Soulier; Christophe Rodriguez; Elisabeth Trawinski; Guillaume Gricourt; Jean-Michel Pawlowsky; Melissa N'Debi; Slim Fourati; Vanessa Demontant                                                                                                                                                                                                                                                                                                                                                                                                                                                                                  |

|                                                                                                      |                                                                                     |                                                                                                                                                    |                                                                                                                                                                                                                                                                                                                                                                                                                                                                                                                                                                                                       |
|------------------------------------------------------------------------------------------------------|-------------------------------------------------------------------------------------|----------------------------------------------------------------------------------------------------------------------------------------------------|-------------------------------------------------------------------------------------------------------------------------------------------------------------------------------------------------------------------------------------------------------------------------------------------------------------------------------------------------------------------------------------------------------------------------------------------------------------------------------------------------------------------------------------------------------------------------------------------------------|
| EPI_ISL_1672704<br>EPI_ISL_940160                                                                    | Hôpital Bichat Claude Bernard, Laboratoire de Virologie                             | IAME UMR1137 Inserm, Université de Paris, Hôpital Bichat                                                                                           | Alexandre Storto; Amélie Recoing; Antoine Bridier-Nahmias; Benoit Visseaux; Charlotte Charpentier; Diane Descamps; Gilles Collin; Lena Daniel; Mélanie Bertine; Nadhira Houhou-Fidouh; Quentin Le Hingrat; Siham Hamri                                                                                                                                                                                                                                                                                                                                                                                |
| EPI_ISL_1085610, see above                                                                           | Hôpital Henri Mondor                                                                | Department of Virology, Henri Mondor University Hospital, Assistance Publique Hôpitaux de Paris, Université Paris-Est Créteil, INSERM U955         | Alexandre Soulier; Christophe Rodriguez; Elisabeth Trawinski; Guillaume Gricourt; Jean-Michel Pawlotsky; Melissa N'Debi; Slim Fourati; Vanessa Demontant                                                                                                                                                                                                                                                                                                                                                                                                                                              |
| EPI_ISL_1672723, EPI_ISL_1672794                                                                     | Hôpital Paul Brousse                                                                | Department of Virology, Henri Mondor University Hospital, Assistance Publique Hôpitaux de Paris, Université Paris-Est Créteil, INSERM U955         | Alexandre Soulier; Christophe Rodriguez; Elisabeth Trawinski; Guillaume Gricourt; Jean-Michel Pawlotsky; Melissa N'Debi; Slim Fourati; Vanessa Demontant                                                                                                                                                                                                                                                                                                                                                                                                                                              |
| EPI_ISL_1110170, EPI_ISL_1110210                                                                     | Hôpital Pitié-Salpêtrière                                                           | Department of Virology, Henri Mondor University Hospital, Assistance Publique Hôpitaux de Paris, Université Paris-Est Créteil, INSERM U955         | Alexandre Soulier; Christophe Rodriguez; Elisabeth Trawinski; Guillaume Gricourt; Jean-Michel Pawlotsky; Melissa N'Debi; Slim Fourati; Vanessa Demontant                                                                                                                                                                                                                                                                                                                                                                                                                                              |
| EPI_ISL_1672452, EPI_ISL_1672453                                                                     | Hôpitaux Universitaires de Strasbourg NHC                                           | Department of Virology, Henri Mondor University Hospital, Assistance Publique Hôpitaux de Paris, Université Paris-Est Créteil, INSERM U955         | Alexandre Soulier; Christophe Rodriguez; Elisabeth Trawinski; Guillaume Gricourt; Jean-Michel Pawlotsky; Melissa N'Debi; Slim Fourati; Vanessa Demontant                                                                                                                                                                                                                                                                                                                                                                                                                                              |
| EPI_ISL_2359858                                                                                      | ICH-SION                                                                            | Laboratory of genomics and metagenomics                                                                                                            | Claire Bertelli; Damien Jacot; Gilbert Greub; Sébastien Aeby; Trestan Pillonel                                                                                                                                                                                                                                                                                                                                                                                                                                                                                                                        |
| EPI_ISL_1097023, EPI_ISL_1097024                                                                     | IHU Mediterranean Infection                                                         | IHU Mediterranean Infection                                                                                                                        | Philippe Colson et al.                                                                                                                                                                                                                                                                                                                                                                                                                                                                                                                                                                                |
| EPI_ISL_2444814, EPI_ISL_2444817, EPI_ISL_2444827, EPI_ISL_2444829                                   | IICS-UNA                                                                            | IICS-UNA                                                                                                                                           | Adriana Valenzuela; Alejandra Rojas; Chyntia Diaz; Eva Nara; Fatima Cardozo; Florencia del Puerto; Joel Ortiz; Jonas Fernandez; Laura Franco; Laura Mendoza; Leticia Rojas; Magaly Martinez; Maria Eugenia Galeano.                                                                                                                                                                                                                                                                                                                                                                                   |
| EPI_ISL_1495760, EPI_ISL_1495761                                                                     | ILV Kärnten                                                                         | Bergthaler laboratory, CeMM Research Center for Molecular Medicine of the Austrian Academy of Sciences                                             | Andreas Bergthaler; Anna Schedl; Bekir Erguner; Benedikt Agerer; Christoph Bock; Fabian Amman; Jan Laine; Lukas Endler; Maelle Le Moing; Martin Senekowitsch; Michael Schuster; Petr Triska; Thomas Penz                                                                                                                                                                                                                                                                                                                                                                                              |
| EPI_ISL_2628208                                                                                      | INHRR                                                                               | Laboratorio de Virología Molecular                                                                                                                 | Carmen L. Loureiro; CoVIVen Group; Domingo J Garzaro; Esmeralda Vizzi; Flor H Pujol; Héctor R Rangel; José Luis Zambrano; Lieska Rodríguez; Mariana Hidalgo; Pierina D'Angelo; Rossana C Jaspe; Víctor Alarcón; Yoneira Sulbaran; Zoila Moros                                                                                                                                                                                                                                                                                                                                                         |
| EPI_ISL_2879781                                                                                      | INSACOG Surveillance                                                                | INSACOG at CSIR Institute of Genomics and Integrative Biology                                                                                      | INSACOG                                                                                                                                                                                                                                                                                                                                                                                                                                                                                                                                                                                               |
| EPI_ISL_2521611                                                                                      | INSACOG-Mizoram                                                                     | National Institute of Biomedical Genomics - INSACOG                                                                                                | Arindam Maitra; Gracy Laldinmawii; N Senthil Kumar; Nidhan Kumar Biswas; Saumitra Das; Sreedhar Chinnaswamy; Swagnik Roy                                                                                                                                                                                                                                                                                                                                                                                                                                                                              |
| EPI_ISL_2132720, EPI_ISL_2548435, EPI_ISL_2548441                                                    | INSACOG-WB                                                                          | National Institute of Biomedical Genomics - INSACOG                                                                                                | Ajay Chakraborti; Arindam Maitra; Bhaswati Bandyopadhyay; Nidhan Kumar Biswas; Saumitra Das; Sreedhar Chinnaswamy; Tamal Ghosh                                                                                                                                                                                                                                                                                                                                                                                                                                                                        |
| EPI_ISL_826823                                                                                       | INSPI-CRN DE INFLUENZA Y OTROS VIRUS RESPIRATORIOS                                  | Instituto de Salud Pública de Chile                                                                                                                | Alfredo Bruno; Andres Castillo; Barbara Parra; Domenica de Mora; Gisselle Barra; Jaime Lagos; Javier Tognarelli; Jimmy Garcez; Jorge Fernandez; Loredana Arata; Manuel Gonzalez; Martiza Olmedo; Michelle Paez; Patricia Bustos; Rodrigo Fasce; Solon Narvaez                                                                                                                                                                                                                                                                                                                                         |
| EPI_ISL_2015111                                                                                      | IU-Cerrahpasa, Cerrahpasa School of Medicine, COVID-19 Lab                          | IU-Cerrahpasa, Cerrahpasa School of Medicine, COVID-19 Lab                                                                                         | Kenan Midilli; Mert Kuskucu; Yesim Tuyji Tok                                                                                                                                                                                                                                                                                                                                                                                                                                                                                                                                                          |
| EPI_ISL_2628303, EPI_ISL_2628304, EPI_ISL_2628306, EPI_ISL_3281603, EPI_ISL_3298689, EPI_ISL_3298766 | IVIC                                                                                | Laboratorio de Virología Molecular                                                                                                                 | Carmen L Loureiro; CoViMol Group; CoVIVen Group; Domingo J Garzaro; Esmeralda Vizzi; Flor H Pujol; Héctor R Rangel; José Luis Zambrano; Lieska Rodríguez; Mariana Hidalgo; Pierina D'Angelo; Rossana C Jaspe; Víctor Alarcón; Yoneira Sulbaran; Zoila Moros                                                                                                                                                                                                                                                                                                                                           |
| EPI_ISL_1086108, EPI_ISL_1509303                                                                     | IZSM                                                                                | TIGEM                                                                                                                                              | Andrea Ballabio; Anna Manfredi; Antonio Grimaldi; Antonio Grimaldi Patrizia Annunziata Francesco Panariello Biancamaria Pierri Claudia Tiberio Valentina Bouche Chiara Colantuono Maria Concetta Cuomo Denise Di Concilio Lucio Di Filippo Anna Manfredi Marcello Salvi Antonio Limone Luigi Atripaldi Pellegrino Cerino Andrea Ballabio Davide Cacchiarelli; Antonio Limone; Biancamaria Pierri; Chiara Colantuono; Davide Cacchiarelli.; Denise Di Concilio; Francesco Panariello; Lucio Di Filippo; Marcello Salvi; Maria Concetta Cuomo; Patrizia Annunziata; Pellegrino Cerino; Valentina Bouche |
| EPI_ISL_2365910                                                                                      | Imeda Hospital                                                                      | Imelda Hospital                                                                                                                                    | Dagmar Obbels; Hanne Valgaeren; Johan Frans                                                                                                                                                                                                                                                                                                                                                                                                                                                                                                                                                           |
| EPI_ISL_2001064, EPI_ISL_2001068                                                                     | Immunology, Noguchi Memorial Institute for Medical Research                         | Immunology, Noguchi Memorial Institute for Medical Research                                                                                        | A.W.; Adu, B.; Agbodji, B.; Appiah-Kubi, J.; Asare; Assane, H.; Awunyo, S.; Bonney; Campbell, A.; Dagnran, A.; Dorkenoo, A.; Gevao, S.; Halatoko; Harding, D.; Issa, Z.; J.K.; K.M.; Kossi, K.; Kumordjie, S.; Lamboni, L.; Layibo, Y.; Maman, I.; Mohkhar, Q.; Rogers, J.; Sadij; Salah, D.; Salou, M.; Wurie, I.; Y.A.                                                                                                                                                                                                                                                                              |
| EPI_ISL_1517392                                                                                      | Incienza, Instituto Costarricense de Investigación y Enseñanza en Nutrición y Salud | Incienza, Instituto Costarricense de Investigación y Enseñanza en Nutrición y Salud                                                                | Cristian Pérez-Corrales; Valeria Peralta-Barquero & Patricia Salas                                                                                                                                                                                                                                                                                                                                                                                                                                                                                                                                    |
| EPI_ISL_893214                                                                                       | Indiana Animal Disease Diagnostic Laboratory                                        | Carpi Laboratory - Purdue University                                                                                                               | Abebe A Fola; G Kenitra Hendrix; Giovanna Carpi; Ilinca I Ciubotariu; Jack Dorman; Lev Gorenstein; Rebecca P Wilkes                                                                                                                                                                                                                                                                                                                                                                                                                                                                                   |
| EPI_ISL_3275174, see above                                                                           | Indira Gandhi Memorial Hospital                                                     | Indira Gandhi Memorial Hospital                                                                                                                    | Dr. Milza Abdul Muhsin; Mr. Ibrahim Nishan Ahmed; Ms. Aishath Shuhudha; Ms. Aminath Nazfa; Ms. Fathimath Zimna                                                                                                                                                                                                                                                                                                                                                                                                                                                                                        |
| EPI_ISL_1502814                                                                                      | Infectious Diseases Department , Instituto Nacional de Ciencias Medicas y Nutrición | Instituto Nacional de Ciencias Medicas y Nutricion Infectious Diseases                                                                             | Diana Paola Davalos Martinez; Fernando Arteaga Cabello; Fernando Ledesma Barrientos; Guillermo M. Ruiz-Palacios; Luis Alberto Garcia Andrade; Luz Elena Cervantes Villar; Miriam Arciniega Fuentes; Pilar Ramos Cervantes; Violeta Ibarra Gonzalez                                                                                                                                                                                                                                                                                                                                                    |
| EPI_ISL_2151337                                                                                      | Infectious Diseases, King Faisal Hospital Research Center                           | Infectious Diseases, King Faisal Hospital Research Center                                                                                          | Al-Qahtani A. A.; Alahideb B. M.; Alhamlan F. S.; Almaghrabi R. S.; Alsanea M. S.; Althawadi S. I.; Balavenkatesh Mani; M. and UdayaRaja G. K.; Mutabagani M. S.                                                                                                                                                                                                                                                                                                                                                                                                                                      |
| EPI_ISL_1692506, EPI_ISL_2186300, EPI_ISL_2282386, EPI_ISL_2283188, EPI_ISL_2323864                  | Infinity Biologix                                                                   | Centers for Disease Control and Prevention Division of Viral Diseases, Pathogen Discovery                                                          | Adrian Paskey; Benjamin Rambo-Martin; Chirayu Goswami; Christian Bixby; Christopher Gulwick; Clinton R. Paden; Dakota Howard; Darlene Wagner; Dhvani Batra; Duncan MacCannell; Jason Caravas; Jonathan Schultz; Kara Moser; Matthew Schmerer; Peter W. Cook; Robin Grimwood; Russ Hager; Scott Sammons; Shatavia Morrison; Yihe Wang; Yvette Unarumhi                                                                                                                                                                                                                                                 |
| EPI_ISL_2281237, EPI_ISL_2281238, EPI_ISL_2281245                                                    | Insitut Pasteur Bangui                                                              | Institut Pasteur de Dakar                                                                                                                          | Amadou Alpha Sall; Amadou Diallo; Benjamin Selekon; Cheikh Loucoubar; Christian Malaka; Mamadou Diop; Marie-Astrid Vernet; Moussa Moise Diagne; Ndock Ndiaye; Ndongo Dia; Ousmane Faye; Rivalyn Nakoune Yandoko; Safietou Sankhe; Sandra Garba Ouangole                                                                                                                                                                                                                                                                                                                                               |
| EPI_ISL_1908147, see above                                                                           | Institut National d'Hygiène                                                         | Laboratoire de Biotechnologie                                                                                                                      | Abdelmunim Essabbar; Fatima El Falaki; Fatima ElFalaki; Hicham Oumzili; Lahcen Belyamani and Azeddine Ibrahimii; Mohamde Rhajaoui; Mohamed Rhajaoui; Mouna Ouadghiri; Saaid Amzazi; Tarik Aanniz                                                                                                                                                                                                                                                                                                                                                                                                      |
| EPI_ISL_1434443, EPI_ISL_1436817                                                                     | Institut National d'Hygiène                                                         | Unité Mixte Internationale TransVIHMI (UMI 233 IRD - U1175 INSERM - Université de Montpellier) IRD (Institut de recherche pour le développement)   | Abla A. KONOU; Adodo SADJI; Ahidjo AYOUBA; Akoélé SILIADIN; Alassane OURO-MEDELI; Amivi EHLAN; Améyo DORKENOU; Anoumou DAGNRA; Christelle BUTEL; Déléma MABA; Eric DELAPORTE; Issaka Maman; Kokou TEGUENI; Laetitia SERRANO; Martine PEETERS; Messanh DOUFFAN; Mireille PRINCE-DAVID; Mounerou SALOU; Sidonie A.M.KAGNISSODE; Sika DOSSIM; Wembo A. HALATOKO                                                                                                                                                                                                                                          |
| EPI_ISL_2111158                                                                                      | Institut National d'Hygiène Consortium National de Veille Génomique - Maroc         | Laboratoire de Biotechnologie                                                                                                                      | Abdelmunim Essabbar; Fatima El Falaki; Hicham Oumzili; Lahcen Belyamani and Azeddine Ibrahimii; Mohamde Rhajaoui; Mouna Ouadghiri; Saaid Amzazi; Tarik Aanniz                                                                                                                                                                                                                                                                                                                                                                                                                                         |
| EPI_ISL_1443002                                                                                      | Institut National d'hygiène                                                         | "Unité Mixte Internationale TransVIHMI (UMI 233 IRD - U1175 INSERM - Université de Montpellier) IRD (Institut de recherche pour le développement)" | Abla A. KONOU; Adodo SADJI; Ahidjo AYOUBA; Akoélé SILIADIN; Alassane OURO-MEDELI; Amivi EHLAN; Améyo DORKENOU; Anoumou DAGNRA; Christelle BUTEL; Déléma MABA; Eric DELAPORTE; Issaka Maman; Kokou TEGUENI; Laetitia SERRANO; Martine PEETERS; Messanh DOUFFAN; Mireille PRINCE-DAVID; Mounerou SALOU; Sidonie A.M.KAGNISSODE; Sika DOSSIM; Wembo A. HALATOKO                                                                                                                                                                                                                                          |
| EPI_ISL_1303031, EPI_ISL_2278010                                                                     | Institut National d'Hygiène (INH)                                                   | Unité Mixte Internationale TransVIHMI (UMI 233 IRD - U1175 INSERM - Université de Montpellier)IRD (Institut de recherche pour le développement)    | Abla A. KONOU; Adodo SADJI; Ahidjo AYOUBA; Akoélé SILIADIN; Alassane OURO-MEDELI; Amivi EHLAN; Améyo DORKENOU; Anoumou DAGNRA; Christelle BUTEL; Déléma MABA; Eric DELAPORTE; Issaka Maman; Kokou TEGUENI; Laetitia SERRANO; Martine PEETERS; Messanh DOUFFAN; Mireille PRINCE-DAVID; Mounerou SALOU; Sidonie A.M.KAGNISSODE; Sika DOSSIM; Wembo A. HALATOKO                                                                                                                                                                                                                                          |
| EPI_ISL_418206, see above                                                                            | Institut Pasteur Dakar                                                              | Institut Pasteur de Dakar                                                                                                                          | Amadou Alpha Sall; Amadou Alpha Sall.; Amadou Alpha sall; Mamadou Diop; Mamadou Malado Jallow; Mamadou malado Jallow; Marie Henriette Dior Ndione; Moussa Moise Diagne; Ndongo Dia; Ousmane Faye; Safietou Sankhe                                                                                                                                                                                                                                                                                                                                                                                     |
| EPI_ISL_498239                                                                                       | Institut Pasteur de Dakar                                                           | Institut Pasteur de Dakar                                                                                                                          | Amadou Alpha Sall.; Mamadou Diop; Mamadou Malado Jallow; Marie Henriette Dior Ndione; Moussa Moise Diagne; Ndongo Dia; Ousmane Faye; Safietou Sankhe Mbengue                                                                                                                                                                                                                                                                                                                                                                                                                                          |
| EPI_ISL_1013236, EPI_ISL_1013425                                                                     | Institut Pasteur de Guadeloupe                                                      | National Reference Center for Viruses of Respiratory Infections, Institut Pasteur, Paris                                                           | Angela Brisebarre; Camille Capel; Etienne Simon-Lorière; Marion Barbet; Maud Vanpeene; Méline Bizard; Sylvie Behillil; Sylvie van der Werf; Talarmin Antoine; Vincent Enouf                                                                                                                                                                                                                                                                                                                                                                                                                           |
| EPI_ISL_2245780, see above                                                                           | Institut Pasteur de Guinée                                                          | Institut Pateur de Dakar                                                                                                                           | Dia Ndongo; Diagne Moussa Moise; Diallo Amadou; Diop Mamadou; Faye Ousmane; Grayo Solene; Loucoubar Cheikh; Maimouna Mbanne; Mbengue Safietou Sankhe; Mohamed Kane; Ndiaye Ndock; Sall Amadou Alpha; Tordo Noel                                                                                                                                                                                                                                                                                                                                                                                       |
| EPI_ISL_613429                                                                                       | Institut Pasteur de la Guadeloupe                                                   | Institut Pasteur de la Guadeloupe                                                                                                                  | Angela Brisebarre; Antoine Talarmin; Camille Capel; Etienne Simon-Lorière; Marion Barbet; Maud Vanpeene; Méline Bizard; Stéphanie Guymard; Sylvie Behillil; Sylvie van der Werf; Sébastien Breuer; Vincent Enouf                                                                                                                                                                                                                                                                                                                                                                                      |
| EPI_ISL_2966236                                                                                      | Institut Pasteur du Maroc                                                           | Functional Genomic Platform/CNRST                                                                                                                  | Alaoui Sanaa-amine; Chouati Taha; EL FAHIME Elmostafa; Elannaz Hicham; Ennibi Khalid; Ghamaz Hamza; Hemlali Mouhsine; MERABET MOUAD; Maaroufi Abderrahmane; Mellou Marouane; NOURLIL Jalal; Touil Nadia; Youbi Mohammed                                                                                                                                                                                                                                                                                                                                                                               |
| EPI_ISL_2110643                                                                                      | Institut Pasteur du Maroc                                                           | Functional Genomics platform/CNRST                                                                                                                 | Abdelkrim Meziane Bellefquih; Alaoui Sanaa-amine; Chouati Taha; EL FAHIME Elmostafa; Elannaz Hicham; Ennibi Khalid; Hemlali Mouhsine; MERABET MOUAD; Maaroufi Abderrahmane; Mellou Marouane; NOURLIL Jalal; Touil Nadia; Youbi Mohammed                                                                                                                                                                                                                                                                                                                                                               |

|                                                                                                                                                                                                                                                                                                                                                                                                                                                                                                                                                                                                                                                                                                                                                                                                                                                                                                                                                                                                                                                                                                                                                                                                                                                                                                                                                                                                                                                                                                                                                                                                                                                                                                                                                                                                                                                                                                                                                                                                                                                                                                                                                                                                                                                                                                                                                                                                                                                                                                                                                                                                                                                                                                                                                                                                                                                                                                                                                                                                                                                                                                                                                                                                                                                                                                                                                                                                                                                                                                                                                                                                                                                                                                                                                                                                                                                                                                                                                                                                                                                                                                                                                                                                                                                                                                                                                                                                                                                                                                                                                                                                                                                                                                                                                                                                                                                                                                                                                                                                                                                                                                                                                                                                                                                                                                                                                                                                                                                                                                                                                                                                                                                                                                                                                                                                                                                                                                                                                                                                                                                                                                                                                                                                                                                                                                                                                                                                                                                                                                                                                                                                                                                                                                                                                                                                                                                                                                                                                                                                                                                                                                                                                                                                                                                                                                                                                                                                                                                                                                                                                                                                                                                                                                                                                                                                                                                                                                                                                                                                                                                                                                                                                                                                                                                                                                                                                                                                                                                                                                                                                                                                                                                                                                                                                                                                                                                                                                                                                                                                                                                                                                                                                                                                                                                                                                                                                                                                                                                                                                                                                                                                                                                                                                                                                                                                                                                                                                                                                                                                                                                                                                                                                                                                                                                                                                                                                                                                                                                                                                                                                                                                                                                                                                                                                                                                                                                                                                                                                                                                                                                                                                                                                                                                                                                                                                                                                                                                                                                                                                                                                                                                                                                                                                                                                                                                                                                                                                                                                                                                                                                                                                                                                                                                                                                                                                                                                                                                                                                                                                                                                                                                                                                                                                                                                                                                                                                                                                                                                                                                                                                                                                                                                                                                                                                                                                                                                                                                                                                                                                                                                                                                                                                                                                                                                                                                                                                                                                                |                                                                                                                                |                                                                                                                                |                                                                                                                                                                                                                                                                                                                                                                                                                                                                                                                      |
|----------------------------------------------------------------------------------------------------------------------------------------------------------------------------------------------------------------------------------------------------------------------------------------------------------------------------------------------------------------------------------------------------------------------------------------------------------------------------------------------------------------------------------------------------------------------------------------------------------------------------------------------------------------------------------------------------------------------------------------------------------------------------------------------------------------------------------------------------------------------------------------------------------------------------------------------------------------------------------------------------------------------------------------------------------------------------------------------------------------------------------------------------------------------------------------------------------------------------------------------------------------------------------------------------------------------------------------------------------------------------------------------------------------------------------------------------------------------------------------------------------------------------------------------------------------------------------------------------------------------------------------------------------------------------------------------------------------------------------------------------------------------------------------------------------------------------------------------------------------------------------------------------------------------------------------------------------------------------------------------------------------------------------------------------------------------------------------------------------------------------------------------------------------------------------------------------------------------------------------------------------------------------------------------------------------------------------------------------------------------------------------------------------------------------------------------------------------------------------------------------------------------------------------------------------------------------------------------------------------------------------------------------------------------------------------------------------------------------------------------------------------------------------------------------------------------------------------------------------------------------------------------------------------------------------------------------------------------------------------------------------------------------------------------------------------------------------------------------------------------------------------------------------------------------------------------------------------------------------------------------------------------------------------------------------------------------------------------------------------------------------------------------------------------------------------------------------------------------------------------------------------------------------------------------------------------------------------------------------------------------------------------------------------------------------------------------------------------------------------------------------------------------------------------------------------------------------------------------------------------------------------------------------------------------------------------------------------------------------------------------------------------------------------------------------------------------------------------------------------------------------------------------------------------------------------------------------------------------------------------------------------------------------------------------------------------------------------------------------------------------------------------------------------------------------------------------------------------------------------------------------------------------------------------------------------------------------------------------------------------------------------------------------------------------------------------------------------------------------------------------------------------------------------------------------------------------------------------------------------------------------------------------------------------------------------------------------------------------------------------------------------------------------------------------------------------------------------------------------------------------------------------------------------------------------------------------------------------------------------------------------------------------------------------------------------------------------------------------------------------------------------------------------------------------------------------------------------------------------------------------------------------------------------------------------------------------------------------------------------------------------------------------------------------------------------------------------------------------------------------------------------------------------------------------------------------------------------------------------------------------------------------------------------------------------------------------------------------------------------------------------------------------------------------------------------------------------------------------------------------------------------------------------------------------------------------------------------------------------------------------------------------------------------------------------------------------------------------------------------------------------------------------------------------------------------------------------------------------------------------------------------------------------------------------------------------------------------------------------------------------------------------------------------------------------------------------------------------------------------------------------------------------------------------------------------------------------------------------------------------------------------------------------------------------------------------------------------------------------------------------------------------------------------------------------------------------------------------------------------------------------------------------------------------------------------------------------------------------------------------------------------------------------------------------------------------------------------------------------------------------------------------------------------------------------------------------------------------------------------------------------------------------------------------------------------------------------------------------------------------------------------------------------------------------------------------------------------------------------------------------------------------------------------------------------------------------------------------------------------------------------------------------------------------------------------------------------------------------------------------------------------------------------------------------------------------------------------------------------------------------------------------------------------------------------------------------------------------------------------------------------------------------------------------------------------------------------------------------------------------------------------------------------------------------------------------------------------------------------------------------------------------------------------------------------------------------------------------------------------------------------------------------------------------------------------------------------------------------------------------------------------------------------------------------------------------------------------------------------------------------------------------------------------------------------------------------------------------------------------------------------------------------------------------------------------------------------------------------------------------------------------------------------------------------------------------------------------------------------------------------------------------------------------------------------------------------------------------------------------------------------------------------------------------------------------------------------------------------------------------------------------------------------------------------------------------------------------------------------------------------------------------------------------------------------------------------------------------------------------------------------------------------------------------------------------------------------------------------------------------------------------------------------------------------------------------------------------------------------------------------------------------------------------------------------------------------------------------------------------------------------------------------------------------------------------------------------------------------------------------------------------------------------------------------------------------------------------------------------------------------------------------------------------------------------------------------------------------------------------------------------------------------------------------------------------------------------------------------------------------------------------------------------------------------------------------------------------------------------------------------------------------------------------------------------------------------------------------------------------------------------------------------------------------------------------------------------------------------------------------------------------------------------------------------------------------------------------------------------------------------------------------------------------------------------------------------------------------------------------------------------------------------------------------------------------------------------------------------------------------------------------------------------------------------------------------------------------------------------------------------------------------------------------------------------------------------------------------------------------------------------------------------------------------------------------------------------------------------------------------------------------------------------------------------------------------------------------------------------------------------------------------------------------------------------------------------------------------------------------------------------------------------------------------------------------------------------------------------------------------------------------------------------------------------------------------------------------------------------------------------------------------------------------------------------------------------------------------------------------------------------------------------------------------------------------------------------------------------------------------------------------------------------------------------------------------------------------------------------------------------------------------------------------------------------------------------------------------------------------------------------------------------------------------------------------------------------------------------------------------------------------------------------------------------------------------------------------------------------------------------------------------------------------------------------------------------------------------------------------------------------------------------------------------------------------------------------------------------------------------------------------------------------------------------------------------------------------------------------------------------------------------------------------------------------------------------------------------------------------------------------------------------------------------------------------------------------------------------------------------------------------------------------------------------------------------------------------------------------------------------------------------------------------------------------------------------------------------------------------------------------------------------------------|--------------------------------------------------------------------------------------------------------------------------------|--------------------------------------------------------------------------------------------------------------------------------|----------------------------------------------------------------------------------------------------------------------------------------------------------------------------------------------------------------------------------------------------------------------------------------------------------------------------------------------------------------------------------------------------------------------------------------------------------------------------------------------------------------------|
| EPI_ISL_459972                                                                                                                                                                                                                                                                                                                                                                                                                                                                                                                                                                                                                                                                                                                                                                                                                                                                                                                                                                                                                                                                                                                                                                                                                                                                                                                                                                                                                                                                                                                                                                                                                                                                                                                                                                                                                                                                                                                                                                                                                                                                                                                                                                                                                                                                                                                                                                                                                                                                                                                                                                                                                                                                                                                                                                                                                                                                                                                                                                                                                                                                                                                                                                                                                                                                                                                                                                                                                                                                                                                                                                                                                                                                                                                                                                                                                                                                                                                                                                                                                                                                                                                                                                                                                                                                                                                                                                                                                                                                                                                                                                                                                                                                                                                                                                                                                                                                                                                                                                                                                                                                                                                                                                                                                                                                                                                                                                                                                                                                                                                                                                                                                                                                                                                                                                                                                                                                                                                                                                                                                                                                                                                                                                                                                                                                                                                                                                                                                                                                                                                                                                                                                                                                                                                                                                                                                                                                                                                                                                                                                                                                                                                                                                                                                                                                                                                                                                                                                                                                                                                                                                                                                                                                                                                                                                                                                                                                                                                                                                                                                                                                                                                                                                                                                                                                                                                                                                                                                                                                                                                                                                                                                                                                                                                                                                                                                                                                                                                                                                                                                                                                                                                                                                                                                                                                                                                                                                                                                                                                                                                                                                                                                                                                                                                                                                                                                                                                                                                                                                                                                                                                                                                                                                                                                                                                                                                                                                                                                                                                                                                                                                                                                                                                                                                                                                                                                                                                                                                                                                                                                                                                                                                                                                                                                                                                                                                                                                                                                                                                                                                                                                                                                                                                                                                                                                                                                                                                                                                                                                                                                                                                                                                                                                                                                                                                                                                                                                                                                                                                                                                                                                                                                                                                                                                                                                                                                                                                                                                                                                                                                                                                                                                                                                                                                                                                                                                                                                                                                                                                                                                                                                                                                                                                                                                                                                                                                                                                                                 | Institut Pasteur du Maroc                                                                                                      | Institut Pasteur du Maroc                                                                                                      | Abdellah Faouzi; Anass Abbad; Anderrahmane Maaroufi; Angela Brisebarre; Camille Capel; Etienne Simon-Lorière; Jalal Nourili; Latifa Anga; Marion Barbet; Maud Vanpeene; Mjid Eloualidi; Méline Bizard; Sylvie Behillili; Sylvie van der Werf; Vincent Enouf                                                                                                                                                                                                                                                          |
| EPI_ISL_475820                                                                                                                                                                                                                                                                                                                                                                                                                                                                                                                                                                                                                                                                                                                                                                                                                                                                                                                                                                                                                                                                                                                                                                                                                                                                                                                                                                                                                                                                                                                                                                                                                                                                                                                                                                                                                                                                                                                                                                                                                                                                                                                                                                                                                                                                                                                                                                                                                                                                                                                                                                                                                                                                                                                                                                                                                                                                                                                                                                                                                                                                                                                                                                                                                                                                                                                                                                                                                                                                                                                                                                                                                                                                                                                                                                                                                                                                                                                                                                                                                                                                                                                                                                                                                                                                                                                                                                                                                                                                                                                                                                                                                                                                                                                                                                                                                                                                                                                                                                                                                                                                                                                                                                                                                                                                                                                                                                                                                                                                                                                                                                                                                                                                                                                                                                                                                                                                                                                                                                                                                                                                                                                                                                                                                                                                                                                                                                                                                                                                                                                                                                                                                                                                                                                                                                                                                                                                                                                                                                                                                                                                                                                                                                                                                                                                                                                                                                                                                                                                                                                                                                                                                                                                                                                                                                                                                                                                                                                                                                                                                                                                                                                                                                                                                                                                                                                                                                                                                                                                                                                                                                                                                                                                                                                                                                                                                                                                                                                                                                                                                                                                                                                                                                                                                                                                                                                                                                                                                                                                                                                                                                                                                                                                                                                                                                                                                                                                                                                                                                                                                                                                                                                                                                                                                                                                                                                                                                                                                                                                                                                                                                                                                                                                                                                                                                                                                                                                                                                                                                                                                                                                                                                                                                                                                                                                                                                                                                                                                                                                                                                                                                                                                                                                                                                                                                                                                                                                                                                                                                                                                                                                                                                                                                                                                                                                                                                                                                                                                                                                                                                                                                                                                                                                                                                                                                                                                                                                                                                                                                                                                                                                                                                                                                                                                                                                                                                                                                                                                                                                                                                                                                                                                                                                                                                                                                                                                                                                                                 | Institut für Virologie am Department für Hygiene, Mikrobiologie und Public Health                                              | Bergthaler laboratory, CeMM Research Center for Molecular Medicine of the Austrian Academy of Sciences                         | Alexander Lercher; Alexandra Popa; Andreas Bergthaler; Benedikt Agerer; Christoph Bock; Daniela Schmid; Dorothee von Laer; Elisabeth Puchhammer-Stoeckl; Franz Allerberger; Gregor Hörmann; Guenter Weiss; Henrique Colaco; Jakob-Wendelin Genger; Jan Laine; Judith Aberle; Kinga Rigler-Hohenwarter; Lukas Endler; Manfred Naizr; Mark Smyth; Martin Senekowitsch; Michael Schuster; Peter Hufnagl; Rainer Gattringer; Stephan Aberle; Thomas Penz; Wegene Borena                                                  |
| EPI_ISL_955163                                                                                                                                                                                                                                                                                                                                                                                                                                                                                                                                                                                                                                                                                                                                                                                                                                                                                                                                                                                                                                                                                                                                                                                                                                                                                                                                                                                                                                                                                                                                                                                                                                                                                                                                                                                                                                                                                                                                                                                                                                                                                                                                                                                                                                                                                                                                                                                                                                                                                                                                                                                                                                                                                                                                                                                                                                                                                                                                                                                                                                                                                                                                                                                                                                                                                                                                                                                                                                                                                                                                                                                                                                                                                                                                                                                                                                                                                                                                                                                                                                                                                                                                                                                                                                                                                                                                                                                                                                                                                                                                                                                                                                                                                                                                                                                                                                                                                                                                                                                                                                                                                                                                                                                                                                                                                                                                                                                                                                                                                                                                                                                                                                                                                                                                                                                                                                                                                                                                                                                                                                                                                                                                                                                                                                                                                                                                                                                                                                                                                                                                                                                                                                                                                                                                                                                                                                                                                                                                                                                                                                                                                                                                                                                                                                                                                                                                                                                                                                                                                                                                                                                                                                                                                                                                                                                                                                                                                                                                                                                                                                                                                                                                                                                                                                                                                                                                                                                                                                                                                                                                                                                                                                                                                                                                                                                                                                                                                                                                                                                                                                                                                                                                                                                                                                                                                                                                                                                                                                                                                                                                                                                                                                                                                                                                                                                                                                                                                                                                                                                                                                                                                                                                                                                                                                                                                                                                                                                                                                                                                                                                                                                                                                                                                                                                                                                                                                                                                                                                                                                                                                                                                                                                                                                                                                                                                                                                                                                                                                                                                                                                                                                                                                                                                                                                                                                                                                                                                                                                                                                                                                                                                                                                                                                                                                                                                                                                                                                                                                                                                                                                                                                                                                                                                                                                                                                                                                                                                                                                                                                                                                                                                                                                                                                                                                                                                                                                                                                                                                                                                                                                                                                                                                                                                                                                                                                                                                                                                                 | Institute for Biocides and Medical Ecology                                                                                     | Institute of microbiology and Immunology, Faculty of Medicine, University of Belgrade                                          | Jankovic, M.; Jovanovic, T.; Knezevic, A.; Milicevic, O.; Sekler, M.; Tesovic, B.; Vidanovic, D.                                                                                                                                                                                                                                                                                                                                                                                                                     |
| EPI_ISL_1633465, EPI_ISL_1633466, EPI_ISL_1633467                                                                                                                                                                                                                                                                                                                                                                                                                                                                                                                                                                                                                                                                                                                                                                                                                                                                                                                                                                                                                                                                                                                                                                                                                                                                                                                                                                                                                                                                                                                                                                                                                                                                                                                                                                                                                                                                                                                                                                                                                                                                                                                                                                                                                                                                                                                                                                                                                                                                                                                                                                                                                                                                                                                                                                                                                                                                                                                                                                                                                                                                                                                                                                                                                                                                                                                                                                                                                                                                                                                                                                                                                                                                                                                                                                                                                                                                                                                                                                                                                                                                                                                                                                                                                                                                                                                                                                                                                                                                                                                                                                                                                                                                                                                                                                                                                                                                                                                                                                                                                                                                                                                                                                                                                                                                                                                                                                                                                                                                                                                                                                                                                                                                                                                                                                                                                                                                                                                                                                                                                                                                                                                                                                                                                                                                                                                                                                                                                                                                                                                                                                                                                                                                                                                                                                                                                                                                                                                                                                                                                                                                                                                                                                                                                                                                                                                                                                                                                                                                                                                                                                                                                                                                                                                                                                                                                                                                                                                                                                                                                                                                                                                                                                                                                                                                                                                                                                                                                                                                                                                                                                                                                                                                                                                                                                                                                                                                                                                                                                                                                                                                                                                                                                                                                                                                                                                                                                                                                                                                                                                                                                                                                                                                                                                                                                                                                                                                                                                                                                                                                                                                                                                                                                                                                                                                                                                                                                                                                                                                                                                                                                                                                                                                                                                                                                                                                                                                                                                                                                                                                                                                                                                                                                                                                                                                                                                                                                                                                                                                                                                                                                                                                                                                                                                                                                                                                                                                                                                                                                                                                                                                                                                                                                                                                                                                                                                                                                                                                                                                                                                                                                                                                                                                                                                                                                                                                                                                                                                                                                                                                                                                                                                                                                                                                                                                                                                                                                                                                                                                                                                                                                                                                                                                                                                                                                                                                                                              | Institute for Health Research, Epidemiological Surveillance and Training (IRESSEF)                                             | Abbott                                                                                                                         | Abdou Padane; Ambroise Ahouidi; Aminata Dia; Aminata Mbou; Ana Olivo; Anna julienne selbe Ndiaye; Barbara Harris; Cyrille Diedhiou; Gavin Cloherty; Mary Rodgers; Moustapha Mbow; Nafissatou Leye; Ndeye Diabou Diagne; Papa Alassane Diaw; Souleymane Mbow; Todd Meyer                                                                                                                                                                                                                                              |
| EPI_ISL_1827860, EPI_ISL_1827865, EPI_ISL_1827867, EPI_ISL_1827877, EPI_ISL_1827932, EPI_ISL_1827941, EPI_ISL_1827949                                                                                                                                                                                                                                                                                                                                                                                                                                                                                                                                                                                                                                                                                                                                                                                                                                                                                                                                                                                                                                                                                                                                                                                                                                                                                                                                                                                                                                                                                                                                                                                                                                                                                                                                                                                                                                                                                                                                                                                                                                                                                                                                                                                                                                                                                                                                                                                                                                                                                                                                                                                                                                                                                                                                                                                                                                                                                                                                                                                                                                                                                                                                                                                                                                                                                                                                                                                                                                                                                                                                                                                                                                                                                                                                                                                                                                                                                                                                                                                                                                                                                                                                                                                                                                                                                                                                                                                                                                                                                                                                                                                                                                                                                                                                                                                                                                                                                                                                                                                                                                                                                                                                                                                                                                                                                                                                                                                                                                                                                                                                                                                                                                                                                                                                                                                                                                                                                                                                                                                                                                                                                                                                                                                                                                                                                                                                                                                                                                                                                                                                                                                                                                                                                                                                                                                                                                                                                                                                                                                                                                                                                                                                                                                                                                                                                                                                                                                                                                                                                                                                                                                                                                                                                                                                                                                                                                                                                                                                                                                                                                                                                                                                                                                                                                                                                                                                                                                                                                                                                                                                                                                                                                                                                                                                                                                                                                                                                                                                                                                                                                                                                                                                                                                                                                                                                                                                                                                                                                                                                                                                                                                                                                                                                                                                                                                                                                                                                                                                                                                                                                                                                                                                                                                                                                                                                                                                                                                                                                                                                                                                                                                                                                                                                                                                                                                                                                                                                                                                                                                                                                                                                                                                                                                                                                                                                                                                                                                                                                                                                                                                                                                                                                                                                                                                                                                                                                                                                                                                                                                                                                                                                                                                                                                                                                                                                                                                                                                                                                                                                                                                                                                                                                                                                                                                                                                                                                                                                                                                                                                                                                                                                                                                                                                                                                                                                                                                                                                                                                                                                                                                                                                                                                                                                                                                                                                          | see above                                                                                                                      | Abbott Laboratories                                                                                                            | Abdou Padane; Ambroise Ahouidi; Aminata Dia; Aminata Mbou; Ana Olivo; Anna julienne selbe Ndiaye; Barbara Harris; Cyrille Diedhiou; Gavin Cloherty; Mary Rodgers; Moustapha Mbow; Nafissatou Leye; Ndeye Diabou Diagne; Papa Alassane Diaw; Souleymane Mbow; Todd Meyer                                                                                                                                                                                                                                              |
| EPI_ISL_1495277, EPI_ISL_1495278, EPI_ISL_1495280, EPI_ISL_1495283, EPI_ISL_1495356                                                                                                                                                                                                                                                                                                                                                                                                                                                                                                                                                                                                                                                                                                                                                                                                                                                                                                                                                                                                                                                                                                                                                                                                                                                                                                                                                                                                                                                                                                                                                                                                                                                                                                                                                                                                                                                                                                                                                                                                                                                                                                                                                                                                                                                                                                                                                                                                                                                                                                                                                                                                                                                                                                                                                                                                                                                                                                                                                                                                                                                                                                                                                                                                                                                                                                                                                                                                                                                                                                                                                                                                                                                                                                                                                                                                                                                                                                                                                                                                                                                                                                                                                                                                                                                                                                                                                                                                                                                                                                                                                                                                                                                                                                                                                                                                                                                                                                                                                                                                                                                                                                                                                                                                                                                                                                                                                                                                                                                                                                                                                                                                                                                                                                                                                                                                                                                                                                                                                                                                                                                                                                                                                                                                                                                                                                                                                                                                                                                                                                                                                                                                                                                                                                                                                                                                                                                                                                                                                                                                                                                                                                                                                                                                                                                                                                                                                                                                                                                                                                                                                                                                                                                                                                                                                                                                                                                                                                                                                                                                                                                                                                                                                                                                                                                                                                                                                                                                                                                                                                                                                                                                                                                                                                                                                                                                                                                                                                                                                                                                                                                                                                                                                                                                                                                                                                                                                                                                                                                                                                                                                                                                                                                                                                                                                                                                                                                                                                                                                                                                                                                                                                                                                                                                                                                                                                                                                                                                                                                                                                                                                                                                                                                                                                                                                                                                                                                                                                                                                                                                                                                                                                                                                                                                                                                                                                                                                                                                                                                                                                                                                                                                                                                                                                                                                                                                                                                                                                                                                                                                                                                                                                                                                                                                                                                                                                                                                                                                                                                                                                                                                                                                                                                                                                                                                                                                                                                                                                                                                                                                                                                                                                                                                                                                                                                                                                                                                                                                                                                                                                                                                                                                                                                                                                                                                                                                                            | Institute for Laboratory Diagnostics and Microbiology, Klinikum Klagenfurt am Wörthersee                                       | Bergthaler laboratory, CeMM Research Center for Molecular Medicine of the Austrian Academy of Sciences                         | Andreas Bergthaler; Anna Schedl; Bekir Erguner; Benedikt Agerer; Christoph Bock; Fabian Amman; Jan Laine; Lukas Endler; Maelle Le Moing; Martin Senekowitsch; Michael Schuster; Petr Triska; Thomas Penz                                                                                                                                                                                                                                                                                                             |
| EPI_ISL_490101, EPI_ISL_644672, EPI_ISL_718275, EPI_ISL_2091000, EPI_ISL_2625633                                                                                                                                                                                                                                                                                                                                                                                                                                                                                                                                                                                                                                                                                                                                                                                                                                                                                                                                                                                                                                                                                                                                                                                                                                                                                                                                                                                                                                                                                                                                                                                                                                                                                                                                                                                                                                                                                                                                                                                                                                                                                                                                                                                                                                                                                                                                                                                                                                                                                                                                                                                                                                                                                                                                                                                                                                                                                                                                                                                                                                                                                                                                                                                                                                                                                                                                                                                                                                                                                                                                                                                                                                                                                                                                                                                                                                                                                                                                                                                                                                                                                                                                                                                                                                                                                                                                                                                                                                                                                                                                                                                                                                                                                                                                                                                                                                                                                                                                                                                                                                                                                                                                                                                                                                                                                                                                                                                                                                                                                                                                                                                                                                                                                                                                                                                                                                                                                                                                                                                                                                                                                                                                                                                                                                                                                                                                                                                                                                                                                                                                                                                                                                                                                                                                                                                                                                                                                                                                                                                                                                                                                                                                                                                                                                                                                                                                                                                                                                                                                                                                                                                                                                                                                                                                                                                                                                                                                                                                                                                                                                                                                                                                                                                                                                                                                                                                                                                                                                                                                                                                                                                                                                                                                                                                                                                                                                                                                                                                                                                                                                                                                                                                                                                                                                                                                                                                                                                                                                                                                                                                                                                                                                                                                                                                                                                                                                                                                                                                                                                                                                                                                                                                                                                                                                                                                                                                                                                                                                                                                                                                                                                                                                                                                                                                                                                                                                                                                                                                                                                                                                                                                                                                                                                                                                                                                                                                                                                                                                                                                                                                                                                                                                                                                                                                                                                                                                                                                                                                                                                                                                                                                                                                                                                                                                                                                                                                                                                                                                                                                                                                                                                                                                                                                                                                                                                                                                                                                                                                                                                                                                                                                                                                                                                                                                                                                                                                                                                                                                                                                                                                                                                                                                                                                                                                                                                                                               | Institute for Medical Research, Infectious Disease Research Centre, National Institutes of Health, Ministry of Health Malaysia | Institute for Medical Research, Infectious Disease Research Centre, National Institutes of Health, Ministry of Health Malaysia | Azizan MA; Kalyansundram J; Kamel K; Mohd Zawawi Z; Mohd-Zawawi Z; Ramly N; Robert F; Supiah J; Thayan R                                                                                                                                                                                                                                                                                                                                                                                                             |
| EPI_ISL_2104730, EPI_ISL_2678097                                                                                                                                                                                                                                                                                                                                                                                                                                                                                                                                                                                                                                                                                                                                                                                                                                                                                                                                                                                                                                                                                                                                                                                                                                                                                                                                                                                                                                                                                                                                                                                                                                                                                                                                                                                                                                                                                                                                                                                                                                                                                                                                                                                                                                                                                                                                                                                                                                                                                                                                                                                                                                                                                                                                                                                                                                                                                                                                                                                                                                                                                                                                                                                                                                                                                                                                                                                                                                                                                                                                                                                                                                                                                                                                                                                                                                                                                                                                                                                                                                                                                                                                                                                                                                                                                                                                                                                                                                                                                                                                                                                                                                                                                                                                                                                                                                                                                                                                                                                                                                                                                                                                                                                                                                                                                                                                                                                                                                                                                                                                                                                                                                                                                                                                                                                                                                                                                                                                                                                                                                                                                                                                                                                                                                                                                                                                                                                                                                                                                                                                                                                                                                                                                                                                                                                                                                                                                                                                                                                                                                                                                                                                                                                                                                                                                                                                                                                                                                                                                                                                                                                                                                                                                                                                                                                                                                                                                                                                                                                                                                                                                                                                                                                                                                                                                                                                                                                                                                                                                                                                                                                                                                                                                                                                                                                                                                                                                                                                                                                                                                                                                                                                                                                                                                                                                                                                                                                                                                                                                                                                                                                                                                                                                                                                                                                                                                                                                                                                                                                                                                                                                                                                                                                                                                                                                                                                                                                                                                                                                                                                                                                                                                                                                                                                                                                                                                                                                                                                                                                                                                                                                                                                                                                                                                                                                                                                                                                                                                                                                                                                                                                                                                                                                                                                                                                                                                                                                                                                                                                                                                                                                                                                                                                                                                                                                                                                                                                                                                                                                                                                                                                                                                                                                                                                                                                                                                                                                                                                                                                                                                                                                                                                                                                                                                                                                                                                                                                                                                                                                                                                                                                                                                                                                                                                                                                                                                                                               | Institute for Urban Disease Control and Prevention                                                                             | COVID-19 Network Investigations (CONI) Alliance                                                                                | Amornmas Kongklieng; Angkana Huang; Anthony R. Jones; Arporn Wangwitsatun; Bhakbhoon Panthan; Chonticha Klungtong; Duangkamon Loesbanluechai; Ekawat Pasomsub; Elizabeth Batty; Insee Semsorn; Janjira Thaipadungpanit; Kamolthip Atsawawanunt; Khajohn Joonlasak; Kingkan Rakmanee; Krittikorn Kumpornsin; Namfon Kotanan; Prayuth Kaewmalang; Pukkapon Parnwijitkul; Stefan Fernandez; Thanat Chookajorn; Theerarat Kochakarn; Treewat Wattanachockchai; Vichan Pawin; Wasun Chantrattita; Wuditchai Manasatienkij |
| EPI_ISL_1055791, EPI_ISL_1056970, EPI_ISL_1057041                                                                                                                                                                                                                                                                                                                                                                                                                                                                                                                                                                                                                                                                                                                                                                                                                                                                                                                                                                                                                                                                                                                                                                                                                                                                                                                                                                                                                                                                                                                                                                                                                                                                                                                                                                                                                                                                                                                                                                                                                                                                                                                                                                                                                                                                                                                                                                                                                                                                                                                                                                                                                                                                                                                                                                                                                                                                                                                                                                                                                                                                                                                                                                                                                                                                                                                                                                                                                                                                                                                                                                                                                                                                                                                                                                                                                                                                                                                                                                                                                                                                                                                                                                                                                                                                                                                                                                                                                                                                                                                                                                                                                                                                                                                                                                                                                                                                                                                                                                                                                                                                                                                                                                                                                                                                                                                                                                                                                                                                                                                                                                                                                                                                                                                                                                                                                                                                                                                                                                                                                                                                                                                                                                                                                                                                                                                                                                                                                                                                                                                                                                                                                                                                                                                                                                                                                                                                                                                                                                                                                                                                                                                                                                                                                                                                                                                                                                                                                                                                                                                                                                                                                                                                                                                                                                                                                                                                                                                                                                                                                                                                                                                                                                                                                                                                                                                                                                                                                                                                                                                                                                                                                                                                                                                                                                                                                                                                                                                                                                                                                                                                                                                                                                                                                                                                                                                                                                                                                                                                                                                                                                                                                                                                                                                                                                                                                                                                                                                                                                                                                                                                                                                                                                                                                                                                                                                                                                                                                                                                                                                                                                                                                                                                                                                                                                                                                                                                                                                                                                                                                                                                                                                                                                                                                                                                                                                                                                                                                                                                                                                                                                                                                                                                                                                                                                                                                                                                                                                                                                                                                                                                                                                                                                                                                                                                                                                                                                                                                                                                                                                                                                                                                                                                                                                                                                                                                                                                                                                                                                                                                                                                                                                                                                                                                                                                                                                                                                                                                                                                                                                                                                                                                                                                                                                                                                                                                                                              | Institute of Biocides and Medical Ecology, Belgrade, Serbia                                                                    | Virology Department Institute of Microbiology and Immunology Faculty of Medicine University of Belgrade                        | Abazovic Dzhan; Banko Ana; Despot Dragana; Loncar Ana; Milicevic Ognjen; Miljanovic Danijela                                                                                                                                                                                                                                                                                                                                                                                                                         |
| EPI_ISL_600562                                                                                                                                                                                                                                                                                                                                                                                                                                                                                                                                                                                                                                                                                                                                                                                                                                                                                                                                                                                                                                                                                                                                                                                                                                                                                                                                                                                                                                                                                                                                                                                                                                                                                                                                                                                                                                                                                                                                                                                                                                                                                                                                                                                                                                                                                                                                                                                                                                                                                                                                                                                                                                                                                                                                                                                                                                                                                                                                                                                                                                                                                                                                                                                                                                                                                                                                                                                                                                                                                                                                                                                                                                                                                                                                                                                                                                                                                                                                                                                                                                                                                                                                                                                                                                                                                                                                                                                                                                                                                                                                                                                                                                                                                                                                                                                                                                                                                                                                                                                                                                                                                                                                                                                                                                                                                                                                                                                                                                                                                                                                                                                                                                                                                                                                                                                                                                                                                                                                                                                                                                                                                                                                                                                                                                                                                                                                                                                                                                                                                                                                                                                                                                                                                                                                                                                                                                                                                                                                                                                                                                                                                                                                                                                                                                                                                                                                                                                                                                                                                                                                                                                                                                                                                                                                                                                                                                                                                                                                                                                                                                                                                                                                                                                                                                                                                                                                                                                                                                                                                                                                                                                                                                                                                                                                                                                                                                                                                                                                                                                                                                                                                                                                                                                                                                                                                                                                                                                                                                                                                                                                                                                                                                                                                                                                                                                                                                                                                                                                                                                                                                                                                                                                                                                                                                                                                                                                                                                                                                                                                                                                                                                                                                                                                                                                                                                                                                                                                                                                                                                                                                                                                                                                                                                                                                                                                                                                                                                                                                                                                                                                                                                                                                                                                                                                                                                                                                                                                                                                                                                                                                                                                                                                                                                                                                                                                                                                                                                                                                                                                                                                                                                                                                                                                                                                                                                                                                                                                                                                                                                                                                                                                                                                                                                                                                                                                                                                                                                                                                                                                                                                                                                                                                                                                                                                                                                                                                                                                                 | Institute of Epidemiology Disease Control And Research                                                                         | Institute for Developing Science and Health Initiatives                                                                        | Firdausi Qadri; Lauren Cowley; Md. Mahfuz-Al-mamun; Mokibul Hassan Afrad; Sadia Isfat Ara Rahman; Tahmina Shirin                                                                                                                                                                                                                                                                                                                                                                                                     |
| EPI_ISL_2600368, EPI_ISL_2600369                                                                                                                                                                                                                                                                                                                                                                                                                                                                                                                                                                                                                                                                                                                                                                                                                                                                                                                                                                                                                                                                                                                                                                                                                                                                                                                                                                                                                                                                                                                                                                                                                                                                                                                                                                                                                                                                                                                                                                                                                                                                                                                                                                                                                                                                                                                                                                                                                                                                                                                                                                                                                                                                                                                                                                                                                                                                                                                                                                                                                                                                                                                                                                                                                                                                                                                                                                                                                                                                                                                                                                                                                                                                                                                                                                                                                                                                                                                                                                                                                                                                                                                                                                                                                                                                                                                                                                                                                                                                                                                                                                                                                                                                                                                                                                                                                                                                                                                                                                                                                                                                                                                                                                                                                                                                                                                                                                                                                                                                                                                                                                                                                                                                                                                                                                                                                                                                                                                                                                                                                                                                                                                                                                                                                                                                                                                                                                                                                                                                                                                                                                                                                                                                                                                                                                                                                                                                                                                                                                                                                                                                                                                                                                                                                                                                                                                                                                                                                                                                                                                                                                                                                                                                                                                                                                                                                                                                                                                                                                                                                                                                                                                                                                                                                                                                                                                                                                                                                                                                                                                                                                                                                                                                                                                                                                                                                                                                                                                                                                                                                                                                                                                                                                                                                                                                                                                                                                                                                                                                                                                                                                                                                                                                                                                                                                                                                                                                                                                                                                                                                                                                                                                                                                                                                                                                                                                                                                                                                                                                                                                                                                                                                                                                                                                                                                                                                                                                                                                                                                                                                                                                                                                                                                                                                                                                                                                                                                                                                                                                                                                                                                                                                                                                                                                                                                                                                                                                                                                                                                                                                                                                                                                                                                                                                                                                                                                                                                                                                                                                                                                                                                                                                                                                                                                                                                                                                                                                                                                                                                                                                                                                                                                                                                                                                                                                                                                                                                                                                                                                                                                                                                                                                                                                                                                                                                                                                                                                               | Institute of Epidemiology, Disease Control and Research (IEDCR)                                                                | IEDCR-idesHi-icddr,b                                                                                                           | Firdausi Qadri; Hassan Afrad; Manjur Hossain Khan; Sadia Rahman; Tahmina Shirin                                                                                                                                                                                                                                                                                                                                                                                                                                      |
| EPI_ISL_1599187, EPI_ISL_1915438, EPI_ISL_1938476                                                                                                                                                                                                                                                                                                                                                                                                                                                                                                                                                                                                                                                                                                                                                                                                                                                                                                                                                                                                                                                                                                                                                                                                                                                                                                                                                                                                                                                                                                                                                                                                                                                                                                                                                                                                                                                                                                                                                                                                                                                                                                                                                                                                                                                                                                                                                                                                                                                                                                                                                                                                                                                                                                                                                                                                                                                                                                                                                                                                                                                                                                                                                                                                                                                                                                                                                                                                                                                                                                                                                                                                                                                                                                                                                                                                                                                                                                                                                                                                                                                                                                                                                                                                                                                                                                                                                                                                                                                                                                                                                                                                                                                                                                                                                                                                                                                                                                                                                                                                                                                                                                                                                                                                                                                                                                                                                                                                                                                                                                                                                                                                                                                                                                                                                                                                                                                                                                                                                                                                                                                                                                                                                                                                                                                                                                                                                                                                                                                                                                                                                                                                                                                                                                                                                                                                                                                                                                                                                                                                                                                                                                                                                                                                                                                                                                                                                                                                                                                                                                                                                                                                                                                                                                                                                                                                                                                                                                                                                                                                                                                                                                                                                                                                                                                                                                                                                                                                                                                                                                                                                                                                                                                                                                                                                                                                                                                                                                                                                                                                                                                                                                                                                                                                                                                                                                                                                                                                                                                                                                                                                                                                                                                                                                                                                                                                                                                                                                                                                                                                                                                                                                                                                                                                                                                                                                                                                                                                                                                                                                                                                                                                                                                                                                                                                                                                                                                                                                                                                                                                                                                                                                                                                                                                                                                                                                                                                                                                                                                                                                                                                                                                                                                                                                                                                                                                                                                                                                                                                                                                                                                                                                                                                                                                                                                                                                                                                                                                                                                                                                                                                                                                                                                                                                                                                                                                                                                                                                                                                                                                                                                                                                                                                                                                                                                                                                                                                                                                                                                                                                                                                                                                                                                                                                                                                                                                                                                              | Institute of Epidemiology, Disease Control and Research (IEDCR)                                                                | Institute for Developing Science and Health Initiatives (ideSHI)                                                               | Fidausi Qadri; Hassan Afrad; Sadia Rahman; Tahmina Shirin                                                                                                                                                                                                                                                                                                                                                                                                                                                            |
| EPI_ISL_463091                                                                                                                                                                                                                                                                                                                                                                                                                                                                                                                                                                                                                                                                                                                                                                                                                                                                                                                                                                                                                                                                                                                                                                                                                                                                                                                                                                                                                                                                                                                                                                                                                                                                                                                                                                                                                                                                                                                                                                                                                                                                                                                                                                                                                                                                                                                                                                                                                                                                                                                                                                                                                                                                                                                                                                                                                                                                                                                                                                                                                                                                                                                                                                                                                                                                                                                                                                                                                                                                                                                                                                                                                                                                                                                                                                                                                                                                                                                                                                                                                                                                                                                                                                                                                                                                                                                                                                                                                                                                                                                                                                                                                                                                                                                                                                                                                                                                                                                                                                                                                                                                                                                                                                                                                                                                                                                                                                                                                                                                                                                                                                                                                                                                                                                                                                                                                                                                                                                                                                                                                                                                                                                                                                                                                                                                                                                                                                                                                                                                                                                                                                                                                                                                                                                                                                                                                                                                                                                                                                                                                                                                                                                                                                                                                                                                                                                                                                                                                                                                                                                                                                                                                                                                                                                                                                                                                                                                                                                                                                                                                                                                                                                                                                                                                                                                                                                                                                                                                                                                                                                                                                                                                                                                                                                                                                                                                                                                                                                                                                                                                                                                                                                                                                                                                                                                                                                                                                                                                                                                                                                                                                                                                                                                                                                                                                                                                                                                                                                                                                                                                                                                                                                                                                                                                                                                                                                                                                                                                                                                                                                                                                                                                                                                                                                                                                                                                                                                                                                                                                                                                                                                                                                                                                                                                                                                                                                                                                                                                                                                                                                                                                                                                                                                                                                                                                                                                                                                                                                                                                                                                                                                                                                                                                                                                                                                                                                                                                                                                                                                                                                                                                                                                                                                                                                                                                                                                                                                                                                                                                                                                                                                                                                                                                                                                                                                                                                                                                                                                                                                                                                                                                                                                                                                                                                                                                                                                                                                                                 | Institute of Life Sciences, Bhubaneswar                                                                                        | Immunogenomics lab, Institute of Life Sciences, Bhubaneswar                                                                    | Ajay Parida; Arup Ghosh; Atimukta Jha; DBT's PAN-INDIA 2000 SARS-CoV2 RNA genome sequencing consortium; Eshna Laha; Ghulam Hussain Syed; ILS COVID-19 TEAM; Kautiilya Kumar Jena; Manasi Priyadarshini; Neha Singh; Orissa COVID-19 Study Group; Punet Prasad; Rajeeb Swain; Rupesh Dash; Saiket De; Sandhya Suranjani; Shanti Senapati; Shuchi Smita; Soma Chattopadhyay; Sunil Raghav; Swati Madhulika; Tushar K. Beuria; Viplov K. Biswas                                                                         |
| EPI_ISL_1063496, EPI_ISL_1063521, EPI_ISL_1063522, EPI_ISL_1063996, EPI_ISL_1118863, EPI_ISL_1118864, EPI_ISL_11181840, EPI_ISL_1181852, EPI_ISL_1181856, EPI_ISL_1181859, EPI_ISL_1181860, EPI_ISL_1181861, EPI_ISL_1181862, EPI_ISL_1181865, EPI_ISL_1250645, EPI_ISL_1250657, EPI_ISL_1250658, EPI_ISL_1250661, EPI_ISL_1250677, EPI_ISL_1250681, EPI_ISL_1250684, EPI_ISL_1250685, EPI_ISL_1250686, EPI_ISL_1250687, EPI_ISL_1250688, EPI_ISL_1250689, EPI_ISL_1250690, EPI_ISL_1250691, EPI_ISL_1250692, EPI_ISL_1250693, EPI_ISL_1250694, EPI_ISL_1250695, EPI_ISL_1250696, EPI_ISL_1250697, EPI_ISL_1250698, EPI_ISL_1250699, EPI_ISL_1250700, EPI_ISL_1250701, EPI_ISL_1250702, EPI_ISL_1250703, EPI_ISL_1250704, EPI_ISL_1250705, EPI_ISL_1250706, EPI_ISL_1250707, EPI_ISL_1250708, EPI_ISL_1250709, EPI_ISL_1250710, EPI_ISL_1250711, EPI_ISL_1250712, EPI_ISL_1250713, EPI_ISL_1250714, EPI_ISL_1250715, EPI_ISL_1250716, EPI_ISL_1250717, EPI_ISL_1250718, EPI_ISL_1250719, EPI_ISL_1250720, EPI_ISL_1250721, EPI_ISL_1250722, EPI_ISL_1250723, EPI_ISL_1250724, EPI_ISL_1250725, EPI_ISL_1250726, EPI_ISL_1250727, EPI_ISL_1250728, EPI_ISL_1250729, EPI_ISL_1250730, EPI_ISL_1250731, EPI_ISL_1250732, EPI_ISL_1250733, EPI_ISL_1250734, EPI_ISL_1250735, EPI_ISL_1250736, EPI_ISL_1250737, EPI_ISL_1250738, EPI_ISL_1250739, EPI_ISL_1250740, EPI_ISL_1250741, EPI_ISL_1250742, EPI_ISL_1250743, EPI_ISL_1250744, EPI_ISL_1250745, EPI_ISL_1250746, EPI_ISL_1250747, EPI_ISL_1250748, EPI_ISL_1250749, EPI_ISL_1250750, EPI_ISL_1250751, EPI_ISL_1250752, EPI_ISL_1250753, EPI_ISL_1250754, EPI_ISL_1250755, EPI_ISL_1250756, EPI_ISL_1250757, EPI_ISL_1250758, EPI_ISL_1250759, EPI_ISL_1250760, EPI_ISL_1250761, EPI_ISL_1250762, EPI_ISL_1250763, EPI_ISL_1250764, EPI_ISL_1250765, EPI_ISL_1250766, EPI_ISL_1250767, EPI_ISL_1250768, EPI_ISL_1250769, EPI_ISL_1250770, EPI_ISL_1250771, EPI_ISL_1250772, EPI_ISL_1250773, EPI_ISL_1250774, EPI_ISL_1250775, EPI_ISL_1250776, EPI_ISL_1250777, EPI_ISL_1250778, EPI_ISL_1250779, EPI_ISL_1250780, EPI_ISL_1250781, EPI_ISL_1250782, EPI_ISL_1250783, EPI_ISL_1250784, EPI_ISL_1250785, EPI_ISL_1250786, EPI_ISL_1250787, EPI_ISL_1250788, EPI_ISL_1250789, EPI_ISL_1250790, EPI_ISL_1250791, EPI_ISL_1250792, EPI_ISL_1250793, EPI_ISL_1250794, EPI_ISL_1250795, EPI_ISL_1250796, EPI_ISL_1250797, EPI_ISL_1250798, EPI_ISL_1250799, EPI_ISL_1250800, EPI_ISL_1250801, EPI_ISL_1250802, EPI_ISL_1250803, EPI_ISL_1250804, EPI_ISL_1250805, EPI_ISL_1250806, EPI_ISL_1250807, EPI_ISL_1250808, EPI_ISL_1250809, EPI_ISL_1250810, EPI_ISL_1250811, EPI_ISL_1250812, EPI_ISL_1250813, EPI_ISL_1250814, EPI_ISL_1250815, EPI_ISL_1250816, EPI_ISL_1250817, EPI_ISL_1250818, EPI_ISL_1250819, EPI_ISL_1250820, EPI_ISL_1250821, EPI_ISL_1250822, EPI_ISL_1250823, EPI_ISL_1250824, EPI_ISL_1250825, EPI_ISL_1250826, EPI_ISL_1250827, EPI_ISL_1250828, EPI_ISL_1250829, EPI_ISL_1250830, EPI_ISL_1250831, EPI_ISL_1250832, EPI_ISL_1250833, EPI_ISL_1250834, EPI_ISL_1250835, EPI_ISL_1250836, EPI_ISL_1250837, EPI_ISL_1250838, EPI_ISL_1250839, EPI_ISL_1250840, EPI_ISL_1250841, EPI_ISL_1250842, EPI_ISL_1250843, EPI_ISL_1250844, EPI_ISL_1250845, EPI_ISL_1250846, EPI_ISL_1250847, EPI_ISL_1250848, EPI_ISL_1250849, EPI_ISL_1250850, EPI_ISL_1250851, EPI_ISL_1250852, EPI_ISL_1250853, EPI_ISL_1250854, EPI_ISL_1250855, EPI_ISL_1250856, EPI_ISL_1250857, EPI_ISL_1250858, EPI_ISL_1250859, EPI_ISL_1250860, EPI_ISL_1250861, EPI_ISL_1250862, EPI_ISL_1250863, EPI_ISL_1250864, EPI_ISL_1250865, EPI_ISL_1250866, EPI_ISL_1250867, EPI_ISL_1250868, EPI_ISL_1250869, EPI_ISL_1250870, EPI_ISL_1250871, EPI_ISL_1250872, EPI_ISL_1250873, EPI_ISL_1250874, EPI_ISL_1250875, EPI_ISL_1250876, EPI_ISL_1250877, EPI_ISL_1250878, EPI_ISL_1250879, EPI_ISL_1250880, EPI_ISL_1250881, EPI_ISL_1250882, EPI_ISL_1250883, EPI_ISL_1250884, EPI_ISL_1250885, EPI_ISL_1250886, EPI_ISL_1250887, EPI_ISL_1250888, EPI_ISL_1250889, EPI_ISL_1250890, EPI_ISL_1250891, EPI_ISL_1250892, EPI_ISL_1250893, EPI_ISL_1250894, EPI_ISL_1250895, EPI_ISL_1250896, EPI_ISL_1250897, EPI_ISL_1250898, EPI_ISL_1250899, EPI_ISL_1250900, EPI_ISL_1250901, EPI_ISL_1250902, EPI_ISL_1250903, EPI_ISL_1250904, EPI_ISL_1250905, EPI_ISL_1250906, EPI_ISL_1250907, EPI_ISL_1250908, EPI_ISL_1250909, EPI_ISL_1250910, EPI_ISL_1250911, EPI_ISL_1250912, EPI_ISL_1250913, EPI_ISL_1250914, EPI_ISL_1250915, EPI_ISL_1250916, EPI_ISL_1250917, EPI_ISL_1250918, EPI_ISL_1250919, EPI_ISL_1250920, EPI_ISL_1250921, EPI_ISL_1250922, EPI_ISL_1250923, EPI_ISL_1250924, EPI_ISL_1250925, EPI_ISL_1250926, EPI_ISL_1250927, EPI_ISL_1250928, EPI_ISL_1250929, EPI_ISL_1250930, EPI_ISL_1250931, EPI_ISL_1250932, EPI_ISL_1250933, EPI_ISL_1250934, EPI_ISL_1250935, EPI_ISL_1250936, EPI_ISL_1250937, EPI_ISL_1250938, EPI_ISL_1250939, EPI_ISL_1250940, EPI_ISL_1250941, EPI_ISL_1250942, EPI_ISL_1250943, EPI_ISL_1250944, EPI_ISL_1250945, EPI_ISL_1250946, EPI_ISL_1250947, EPI_ISL_1250948, EPI_ISL_1250949, EPI_ISL_1250950, EPI_ISL_1250951, EPI_ISL_1250952, EPI_ISL_1250953, EPI_ISL_1250954, EPI_ISL_1250955, EPI_ISL_1250956, EPI_ISL_1250957, EPI_ISL_1250958, EPI_ISL_1250959, EPI_ISL_1250960, EPI_ISL_1250961, EPI_ISL_1250962, EPI_ISL_1250963, EPI_ISL_1250964, EPI_ISL_1250965, EPI_ISL_1250966, EPI_ISL_1250967, EPI_ISL_1250968, EPI_ISL_1250969, EPI_ISL_1250970, EPI_ISL_1250971, EPI_ISL_1250972, EPI_ISL_1250973, EPI_ISL_1250974, EPI_ISL_1250975, EPI_ISL_1250976, EPI_ISL_1250977, EPI_ISL_1250978, EPI_ISL_1250979, EPI_ISL_1250980, EPI_ISL_1250981, EPI_ISL_1250982, EPI_ISL_1250983, EPI_ISL_1250984, EPI_ISL_1250985, EPI_ISL_1250986, EPI_ISL_1250987, EPI_ISL_1250988, EPI_ISL_1250989, EPI_ISL_1250990, EPI_ISL_1250991, EPI_ISL_1250992, EPI_ISL_1250993, EPI_ISL_1250994, EPI_ISL_1250995, EPI_ISL_1250996, EPI_ISL_1250997, EPI_ISL_1250998, EPI_ISL_1250999, EPI_ISL_1251000, EPI_ISL_1251001, EPI_ISL_1251002, EPI_ISL_1251003, EPI_ISL_1251004, EPI_ISL_1251005, EPI_ISL_1251006, EPI_ISL_1251007, EPI_ISL_1251008, EPI_ISL_1251009, EPI_ISL_1251010, EPI_ISL_1251011, EPI_ISL_1251012, EPI_ISL_1251013, EPI_ISL_1251014, EPI_ISL_1251015, EPI_ISL_1251016, EPI_ISL_1251017, EPI_ISL_1251018, EPI_ISL_1251019, EPI_ISL_1251020, EPI_ISL_1251021, EPI_ISL_1251022, EPI_ISL_1251023, EPI_ISL_1251024, EPI_ISL_1251025, EPI_ISL_1251026, EPI_ISL_1251027, EPI_ISL_1251028, EPI_ISL_1251029, EPI_ISL_1251030, EPI_ISL_1251031, EPI_ISL_1251032, EPI_ISL_1251033, EPI_ISL_1251034, EPI_ISL_1251035, EPI_ISL_1251036, EPI_ISL_1251037, EPI_ISL_1251038, EPI_ISL_1251039, EPI_ISL_1251040, EPI_ISL_1251041, EPI_ISL_1251042, EPI_ISL_1251043, EPI_ISL_1251044, EPI_ISL_1251045, EPI_ISL_1251046, EPI_ISL_1251047, EPI_ISL_1251048, EPI_ISL_1251049, EPI_ISL_1251050, EPI_ISL_1251051, EPI_ISL_1251052, EPI_ISL_1251053, EPI_ISL_1251054, EPI_ISL_1251055, EPI_ISL_1251056, EPI_ISL_1251057, EPI_ISL_1251058, EPI_ISL_1251059, EPI_ISL_1251060, EPI_ISL_1251061, EPI_ISL_1251062, EPI_ISL_1251063, EPI_ISL_1251064, EPI_ISL_1251065, EPI_ISL_1251066, EPI_ISL_1251067, EPI_ISL_1251068, EPI_ISL_1251069, EPI_ISL_1251070, EPI_ISL_1251071, EPI_ISL_1251072, EPI_ISL_1251073, EPI_ISL_1251074, EPI_ISL_1251075, EPI_ISL_1251076, EPI_ISL_1251077, EPI_ISL_1251078, EPI_ISL_1251079, EPI_ISL_1251080, EPI_ISL_1251081, EPI_ISL_1251082, EPI_ISL_1251083, EPI_ISL_1251084, EPI_ISL_1251085, EPI_ISL_1251086, EPI_ISL_1251087, EPI_ISL_1251088, EPI_ISL_1251089, EPI_ISL_1251090, EPI_ISL_1251091, EPI_ISL_1251092, EPI_ISL_1251093, EPI_ISL_1251094, EPI_ISL_1251095, EPI_ISL_1251096, EPI_ISL_1251097, EPI_ISL_1251098, EPI_ISL_1251099, EPI_ISL_1251100, EPI_ISL_1251101, EPI_ISL_1251102, EPI_ISL_1251103, EPI_ISL_1251104, EPI_ISL_1251105, EPI_ISL_1251106, EPI_ISL_1251107, EPI_ISL_1251108, EPI_ISL_1251109, EPI_ISL_1251110, EPI_ISL_1251111, EPI_ISL_1251112, EPI_ISL_1251113, EPI_ISL_1251114, EPI_ISL_1251115, EPI_ISL_1251116, EPI_ISL_1251117, EPI_ISL_1251118, EPI_ISL_1251119, EPI_ISL_1251120, EPI_ISL_1251121, EPI_ISL_1251122, EPI_ISL_1251123, EPI_ISL_1251124, EPI_ISL_1251125, EPI_ISL_1251126, EPI_ISL_1251127, EPI_ISL_1251128, EPI_ISL_1251129, EPI_ISL_1251130, EPI_ISL_1251131, EPI_ISL_1251132, EPI_ISL_1251133, EPI_ISL_1251134, EPI_ISL_1251135, EPI_ISL_1251136, EPI_ISL_1251137, EPI_ISL_1251138, EPI_ISL_1251139, EPI_ISL_1251140, EPI_ISL_1251141, EPI_ISL_1251142, EPI_ISL_1251143, EPI_ISL_1251144, EPI_ISL_1251145, EPI_ISL_1251146, EPI_ISL_1251147, EPI_ISL_1251148, EPI_ISL_1251149, EPI_ISL_1251150, EPI_ISL_1251151, EPI_ISL_1251152, EPI_ISL_1251153, EPI_ISL_1251154, EPI_ISL_1251155, EPI_ISL_1251156, EPI_ISL_1251157, EPI_ISL_1251158, EPI_ISL_1251159, EPI_ISL_1251160, EPI_ISL_1251161, EPI_ISL_1251162, EPI_ISL_1251163, EPI_ISL_1251164, EPI_ISL_1251165, EPI_ISL_1251166, EPI_ISL_1251167, EPI_ISL_1251168, EPI_ISL_1251169, EPI_ISL_1251170, EPI_ISL_1251171, EPI_ISL_1251172, EPI_ISL_1251173, EPI_ISL_1251174, EPI_ISL_1251175, EPI_ISL_1251176, EPI_ISL_1251177, EPI_ISL_1251178, EPI_ISL_1251179, EPI_ISL_1251180, EPI_ISL_1251181, EPI_ISL_1251182, EPI_ISL_1251183, EPI_ISL_1251184, EPI_ISL_1251185, EPI_ISL_1251186, EPI_ISL_1251187, EPI_ISL_1251188, EPI_ISL_1251189, EPI_ISL_1251190, EPI_ISL_1251191, EPI_ISL_1251192, EPI_ISL_1251193, EPI_ISL_1251194, EPI_ISL_1251195, EPI_ISL_1251196, EPI_ISL_1251197, EPI_ISL_1251198, EPI_ISL_1251199, EPI_ISL_1251200, EPI_ISL_1251201, EPI_ISL_1251202, EPI_ISL_1251203, EPI_ISL_1251204, EPI_ISL_1251205, EPI_ISL_1251206, EPI_ISL_1251207, EPI_ISL_1251208, EPI_ISL_1251209, EPI_ISL_1251210, EPI_ISL_1251211, EPI_ISL_1251212, EPI_ISL_1251213, EPI_ISL_1251214, EPI_ISL_1251215, EPI_ISL_1251216, EPI_ISL_1251217, EPI_ISL_1251218, EPI_ISL_1251219, EPI_ISL_1251220, EPI_ISL_1251221, EPI_ISL_1251222, EPI_ISL_1251223, EPI_ISL_1251224, EPI_ISL_1251225, EPI_ISL_1251226, EPI_ISL_1251227, EPI_ISL_1251228, EPI_ISL_1251229, EPI_ISL_1251230, EPI_ISL_1251231, EPI_ISL_1251232, EPI_ISL_1251233, EPI_ISL_1251234, EPI_ISL_1251235, EPI_ISL_1251236, EPI_ISL_1251237, EPI_ISL_1251238, EPI_ISL_1251239, EPI_ISL_1251240, EPI_ISL_1251241, EPI_ISL_1251242, EPI_ISL_1251243, EPI_ISL_1251244, EPI_ISL_1251245, EPI_ISL_1251246, EPI_ISL_1251247, EPI_ISL_1251248, EPI_ISL_1251249, EPI_ISL_1251250, EPI_ISL_1251251, EPI_ISL_1251252, EPI_ISL_1251253, EPI_ISL_1251254, EPI_ISL_1251255, EPI_ISL_1251256, EPI_ISL_1251257, EPI_ISL_1251258, EPI_ISL_1251259, EPI_ISL_1251260, EPI_ISL_1251261, EPI_ISL_1251262, EPI_ISL_1251263, EPI_ISL_1251264, EPI_ISL_1251265, EPI_ISL_1251266, EPI_ISL_1251267, EPI_ISL_1251268, EPI_ISL_1251269, EPI_ISL_1251270, EPI_ISL_1251271, EPI_ISL_1251272, EPI_ISL_1251273, EPI_ISL_1251274, EPI_ISL_1251275, EPI_ISL_1251276, EPI_ISL_1251277, EPI_ISL_1251278, EPI_ISL_1251279, EPI_ISL_1251280, EPI_ISL_1251281, EPI_ISL_1251282, EPI_ISL_1251283, EPI_ISL_1251284, EPI_ISL_1251285, EPI_ISL_1251286, EPI_ISL_1251287, EPI_ISL_1251288, EPI_ISL_1251289, EPI_ISL_1251290, EPI_ISL_1251291, EPI_ISL_1251292, EPI_ISL_1251293, EPI_ISL_1251294, EPI_ISL_1251295, EPI_ISL_1251296, EPI_ISL_1251297, EPI_ISL_1251298, EPI_ISL_1251299, EPI_ISL_1251300, EPI_ISL_1251301, EPI_ISL_1251302, EPI_ISL_1251303, EPI_ISL_1251304, EPI_ISL_1251305, EPI_ISL_1251306, EPI_ISL_1251307, EPI_ISL_1251308, EPI_ISL_1251309, EPI_ISL_1251310, EPI_ISL_1251311, EPI_ISL_1251312, EPI_ISL_1251313, EPI_ISL_1251314, EPI_ISL_1251315, EPI_ISL_1251316, EPI_ISL_1251317, EPI_ISL_1251318, EPI_ISL_1251319, EPI_ISL_1251320, EPI_ISL_1251321, EPI_ISL_1251322, EPI_ISL_1251323, EPI_ISL_1251324, EPI_ISL_1251325, EPI_ISL_1251326, EPI_ISL_1251327, EPI_ISL_1251328, EPI_ISL_1251329, EPI_ISL_1251330, EPI_ISL_1251331, EPI_ISL_1251332, EPI_ISL_1251333, EPI_ISL_1251334, EPI_ISL_1251335, EPI_ISL_1251336, EPI_ISL_1251337, EPI_ISL_1251338, EPI_ISL_1251339, EPI_ISL_1251340, EPI_ISL_1251341, EPI_ISL_1251342, EPI_ISL_1251343, EPI_ISL_1251344, EPI_ISL_1251345, EPI_ISL_1251346, EPI_ISL_1251347, EPI_ISL_1251348, EPI_ISL_1251349, EPI_ISL_1251350, EPI_ISL_1251351, EPI_ISL_1251352, EPI_ISL_1251353, EPI_ISL_1251354, EPI_ISL_1251355, EPI_ISL_1251356, EPI_ISL_1251357, EPI_ISL_1251358, EPI_ISL_1251359, EPI_ISL_1251360, EPI_ISL_1251361, EPI_ISL_1251362, EPI_ISL_1251363, EPI_ISL_1251364, EPI_ISL_1251365, EPI_ISL_1251366, EPI_ISL_1251367, EPI_ISL_1251368, EPI_ISL_1251369, EPI_ISL_1251370, EPI_ISL_1251371, EPI_ISL_1251372, EPI_ISL_1251373, EPI_ISL_1251374, EPI_ISL_1251375, EPI_ISL_1251376, EPI_ISL_1251377, EPI_ISL_1251378, EPI_ISL_1251379, EPI_ISL_1251380, EPI_ISL_1251381, EPI_ISL_1251382, EPI_ISL_1251383, EPI_ISL_1251384, EPI_ISL_1251385, EPI_ISL_1251386, EPI_ISL_1251387, EPI_ISL_1251388, EPI_ISL_1251389, EPI_ISL_1251390, EPI_ISL_1251391, EPI_ISL_1251392, EPI_ISL_1251393, EPI_ISL_1251394, EPI_ISL_1251395, EPI_ISL_1251396, EPI_ISL_1251397, EPI_ISL_1251398, EPI_ISL_1251399, EPI_ISL_1251400, EPI_ISL_1251401, EPI_ISL_1251402, EPI_ISL_1251403, EPI_ISL_1251404, EPI_ISL_1251405, EPI_ISL_1251406, EPI_ISL_1251407, EPI_ISL_1251408, EPI_ISL_1251409, EPI_ISL_1251410, EPI_ISL_1251411, EPI_ISL_1251412, EPI_ISL_1251413, EPI_ISL_1251414, EPI_ISL_1251415, EPI_ISL_1251416, EPI_ISL_1251417, EPI_ISL_1251418, EPI_ISL_1251419, EPI_ISL_1251420, EPI_ISL_1251421, EPI_ISL_1251422, EPI_ISL_1251423, EPI_ISL_1251424, EPI_ISL_1251425, EPI_ISL_1251426, EPI_ISL_1251427, EPI_ISL_1251428, EPI_ISL_1251429, EPI_ISL_1251430, EPI_ISL_1251431, EPI_ISL_1251432, EPI_ISL_1251433, EPI_ISL_1251434, EPI_ISL_1251435, EPI_ISL_1251436, EPI_ISL_1251437, EPI_ISL_1251438, EPI_ISL_1251439, EPI_ISL_1251440, EPI_ISL_1251441, EPI_ISL_1251442, EPI_ISL_1251443, EPI_ISL_1251444, EPI_ISL_1251445, EPI_ISL_1251446, EPI_ISL_1251447, EPI_ISL_1251448, EPI_ISL_1251 |                                                                                                                                |                                                                                                                                |                                                                                                                                                                                                                                                                                                                                                                                                                                                                                                                      |

and Sequencing Platform, UKZN.

|                                                                                                                                                                                                                                                                                                                                                                                                                                                                                                                                                                                                                                                                                                                                                                                                                                                                                                                                                                                                                                                                                                                                                                                                                                                                                                                                                                                                                                                                                                                                                                                                                                                                                                                                                                                                                                                                                                                                                                                                                                                                                                                                                                                                                                                                                                                                                                                                                                                                                                                                                                                                                                                                                                                                                                                                                                                                                                                                                                                                                                                                                                                                                                                                                                                                                                                                                                                                                                                                                                                                                                                                                                                                                                                                                                                                                                                                                                                                                                                                                                                                                                                                                                                                                                                                                                                                                                                                                                                                                                                                                                                                                                                                                                                                                                                                                                                                                                                                                                                                                                                                                                                                                                                                                                                                                                                                                                                                                                                                                                                                                                                                                                                                                                                                                                                                                                                                                                                                                               |                                                                                                          |                                                                                                                     |                                                                                                                                                                                                                                                                                                                                                                                                                                                                                                                                                                                                                                                                                                                                                                                                                                                                         |                                                                                                                                                                                                                              |
|---------------------------------------------------------------------------------------------------------------------------------------------------------------------------------------------------------------------------------------------------------------------------------------------------------------------------------------------------------------------------------------------------------------------------------------------------------------------------------------------------------------------------------------------------------------------------------------------------------------------------------------------------------------------------------------------------------------------------------------------------------------------------------------------------------------------------------------------------------------------------------------------------------------------------------------------------------------------------------------------------------------------------------------------------------------------------------------------------------------------------------------------------------------------------------------------------------------------------------------------------------------------------------------------------------------------------------------------------------------------------------------------------------------------------------------------------------------------------------------------------------------------------------------------------------------------------------------------------------------------------------------------------------------------------------------------------------------------------------------------------------------------------------------------------------------------------------------------------------------------------------------------------------------------------------------------------------------------------------------------------------------------------------------------------------------------------------------------------------------------------------------------------------------------------------------------------------------------------------------------------------------------------------------------------------------------------------------------------------------------------------------------------------------------------------------------------------------------------------------------------------------------------------------------------------------------------------------------------------------------------------------------------------------------------------------------------------------------------------------------------------------------------------------------------------------------------------------------------------------------------------------------------------------------------------------------------------------------------------------------------------------------------------------------------------------------------------------------------------------------------------------------------------------------------------------------------------------------------------------------------------------------------------------------------------------------------------------------------------------------------------------------------------------------------------------------------------------------------------------------------------------------------------------------------------------------------------------------------------------------------------------------------------------------------------------------------------------------------------------------------------------------------------------------------------------------------------------------------------------------------------------------------------------------------------------------------------------------------------------------------------------------------------------------------------------------------------------------------------------------------------------------------------------------------------------------------------------------------------------------------------------------------------------------------------------------------------------------------------------------------------------------------------------------------------------------------------------------------------------------------------------------------------------------------------------------------------------------------------------------------------------------------------------------------------------------------------------------------------------------------------------------------------------------------------------------------------------------------------------------------------------------------------------------------------------------------------------------------------------------------------------------------------------------------------------------------------------------------------------------------------------------------------------------------------------------------------------------------------------------------------------------------------------------------------------------------------------------------------------------------------------------------------------------------------------------------------------------------------------------------------------------------------------------------------------------------------------------------------------------------------------------------------------------------------------------------------------------------------------------------------------------------------------------------------------------------------------------------------------------------------------------------------------------------------------------------------------|----------------------------------------------------------------------------------------------------------|---------------------------------------------------------------------------------------------------------------------|-------------------------------------------------------------------------------------------------------------------------------------------------------------------------------------------------------------------------------------------------------------------------------------------------------------------------------------------------------------------------------------------------------------------------------------------------------------------------------------------------------------------------------------------------------------------------------------------------------------------------------------------------------------------------------------------------------------------------------------------------------------------------------------------------------------------------------------------------------------------------|------------------------------------------------------------------------------------------------------------------------------------------------------------------------------------------------------------------------------|
| EPI_ISL_887500, EPI_ISL_887502, EPI_ISL_1132826, EPI_ISL_1132834, EPI_ISL_2396897, EPI_ISL_2396914, EPI_ISL_2396919, EPI_ISL_2396926, EPI_ISL_2396931, EPI_ISL_2396934                                                                                                                                                                                                                                                                                                                                                                                                                                                                                                                                                                                                                                                                                                                                                                                                                                                                                                                                                                                                                                                                                                                                                                                                                                                                                                                                                                                                                                                                                                                                                                                                                                                                                                                                                                                                                                                                                                                                                                                                                                                                                                                                                                                                                                                                                                                                                                                                                                                                                                                                                                                                                                                                                                                                                                                                                                                                                                                                                                                                                                                                                                                                                                                                                                                                                                                                                                                                                                                                                                                                                                                                                                                                                                                                                                                                                                                                                                                                                                                                                                                                                                                                                                                                                                                                                                                                                                                                                                                                                                                                                                                                                                                                                                                                                                                                                                                                                                                                                                                                                                                                                                                                                                                                                                                                                                                                                                                                                                                                                                                                                                                                                                                                                                                                                                                        |                                                                                                          |                                                                                                                     |                                                                                                                                                                                                                                                                                                                                                                                                                                                                                                                                                                                                                                                                                                                                                                                                                                                                         |                                                                                                                                                                                                                              |
| see above                                                                                                                                                                                                                                                                                                                                                                                                                                                                                                                                                                                                                                                                                                                                                                                                                                                                                                                                                                                                                                                                                                                                                                                                                                                                                                                                                                                                                                                                                                                                                                                                                                                                                                                                                                                                                                                                                                                                                                                                                                                                                                                                                                                                                                                                                                                                                                                                                                                                                                                                                                                                                                                                                                                                                                                                                                                                                                                                                                                                                                                                                                                                                                                                                                                                                                                                                                                                                                                                                                                                                                                                                                                                                                                                                                                                                                                                                                                                                                                                                                                                                                                                                                                                                                                                                                                                                                                                                                                                                                                                                                                                                                                                                                                                                                                                                                                                                                                                                                                                                                                                                                                                                                                                                                                                                                                                                                                                                                                                                                                                                                                                                                                                                                                                                                                                                                                                                                                                                     | Instituto Nacional de Saude (INS), Mozambique                                                            | KRISP, KZN Research Innovation and Sequencing Platform                                                              |                                                                                                                                                                                                                                                                                                                                                                                                                                                                                                                                                                                                                                                                                                                                                                                                                                                                         | Emmanuel S; Giandhari J; Nadia Siteo; Nalia Ismael; Nedio Mabunda; Paulo Arnaldo; Pillay S; Tegally H; Wilkinson E; de Oliveira T                                                                                            |
| EPI_ISL_913940, EPI_ISL_1054995                                                                                                                                                                                                                                                                                                                                                                                                                                                                                                                                                                                                                                                                                                                                                                                                                                                                                                                                                                                                                                                                                                                                                                                                                                                                                                                                                                                                                                                                                                                                                                                                                                                                                                                                                                                                                                                                                                                                                                                                                                                                                                                                                                                                                                                                                                                                                                                                                                                                                                                                                                                                                                                                                                                                                                                                                                                                                                                                                                                                                                                                                                                                                                                                                                                                                                                                                                                                                                                                                                                                                                                                                                                                                                                                                                                                                                                                                                                                                                                                                                                                                                                                                                                                                                                                                                                                                                                                                                                                                                                                                                                                                                                                                                                                                                                                                                                                                                                                                                                                                                                                                                                                                                                                                                                                                                                                                                                                                                                                                                                                                                                                                                                                                                                                                                                                                                                                                                                               | Instituto de Diagnostico y Referencia Epidemiologicos INDRÉ_RNLSP                                        | Instituto de Diagnostico y Referencia Epidemiologicos (INDRE)                                                       | Abril Rodriguez-Maldonado; Adnan Araiza-Rodriguez; Claudia Wong-Arambula; David Fragosso-Fonseca; Ernesto Ramirez-Gonzalez; Fabiola Garcia-Ayala; Gisela Barrera-Badillo; Irma Lopez-Martinez; Lucia Hernandez-Rivas; Mayra Jimenez-Morales; Nancy Munoz-Hernandez; Natividad Cruz-Ortiz; Sergio Rangel-Guerrero; Tatiana Nunez-Garcia                                                                                                                                                                                                                                                                                                                                                                                                                                                                                                                                  |                                                                                                                                                                                                                              |
| EPI_ISL_1301519                                                                                                                                                                                                                                                                                                                                                                                                                                                                                                                                                                                                                                                                                                                                                                                                                                                                                                                                                                                                                                                                                                                                                                                                                                                                                                                                                                                                                                                                                                                                                                                                                                                                                                                                                                                                                                                                                                                                                                                                                                                                                                                                                                                                                                                                                                                                                                                                                                                                                                                                                                                                                                                                                                                                                                                                                                                                                                                                                                                                                                                                                                                                                                                                                                                                                                                                                                                                                                                                                                                                                                                                                                                                                                                                                                                                                                                                                                                                                                                                                                                                                                                                                                                                                                                                                                                                                                                                                                                                                                                                                                                                                                                                                                                                                                                                                                                                                                                                                                                                                                                                                                                                                                                                                                                                                                                                                                                                                                                                                                                                                                                                                                                                                                                                                                                                                                                                                                                                               | Instituto de Diagnostico y Referencia Epidemiologicos INDRÉ_RNLSP                                        | Instituto de Biotecnologia de la UNAM                                                                               | Alejandra Hernández-Terán; Alejandro Sanchez-Flores; Alma Rincón-Rubio; Andrea Santos Coy-Arechavaleta; Authors from IBT; Blanca Taaboda; Celia Boukadida; Clara Esperanza Santacruz-Tinoco; Eduardo Mendietta-Condado; Eduardo Bernárdi-Vargas; Fernando Mejía-Nepomuceno; Francisco Pulido; Gisela Barrera-Badillo; Gloria Vazquez; Hector Esteban Paz-Juárez; IMSS; INDRÉ and INER (in alphabetical order); Carlos F. Arias; Irma Lopez-Martinez; Jerome Jean Verleyen; Joel Armando Vázquez-Pérez; Jorge Salas-Hernández; José Arturo Martínez-Orozco; José Ernesto Ramírez-González; José Esteban Muñoz-Medina; Larissa Fernandes-Matano; Lucia Hernandez-Rivas; Luis Alberto Ochoa-Carrera; Margarita Matias-Florentino; Mario Mújica-Sánchez; Natividad Cruz-Ortiz; Pavel Isa; Ricardo Grande; Santiago Avila-Rios; Tatiana Nunez-Garcia; Teresita Rojas-Mendoza |                                                                                                                                                                                                                              |
| EPI_ISL_2776175, EPI_ISL_2776177, EPI_ISL_2776197                                                                                                                                                                                                                                                                                                                                                                                                                                                                                                                                                                                                                                                                                                                                                                                                                                                                                                                                                                                                                                                                                                                                                                                                                                                                                                                                                                                                                                                                                                                                                                                                                                                                                                                                                                                                                                                                                                                                                                                                                                                                                                                                                                                                                                                                                                                                                                                                                                                                                                                                                                                                                                                                                                                                                                                                                                                                                                                                                                                                                                                                                                                                                                                                                                                                                                                                                                                                                                                                                                                                                                                                                                                                                                                                                                                                                                                                                                                                                                                                                                                                                                                                                                                                                                                                                                                                                                                                                                                                                                                                                                                                                                                                                                                                                                                                                                                                                                                                                                                                                                                                                                                                                                                                                                                                                                                                                                                                                                                                                                                                                                                                                                                                                                                                                                                                                                                                                                             | Instituto de Medicina Tropical & Salud Global (IMTASG)                                                   | Grubaugh Lab - Yale School of Public Health                                                                         | Alejandro Vallejo Degaudenzi; Anderson Brito; Annie Watkins; Chaney Kalinich; Chantal Vogels; Elisa Contreras; Esperanza Mendoza; Isabel Ott; Jessica Rothman; Joseph Fauver; Kendall Billig; Mallory Breban; Mary Petrone; Nathan Grubaugh; Robert Paulino-Ramirez; Tara Alpert; Tobias Koch; Victor Virgilio Calderon                                                                                                                                                                                                                                                                                                                                                                                                                                                                                                                                                 |                                                                                                                                                                                                                              |
| EPI_ISL_1378833, EPI_ISL_3104763                                                                                                                                                                                                                                                                                                                                                                                                                                                                                                                                                                                                                                                                                                                                                                                                                                                                                                                                                                                                                                                                                                                                                                                                                                                                                                                                                                                                                                                                                                                                                                                                                                                                                                                                                                                                                                                                                                                                                                                                                                                                                                                                                                                                                                                                                                                                                                                                                                                                                                                                                                                                                                                                                                                                                                                                                                                                                                                                                                                                                                                                                                                                                                                                                                                                                                                                                                                                                                                                                                                                                                                                                                                                                                                                                                                                                                                                                                                                                                                                                                                                                                                                                                                                                                                                                                                                                                                                                                                                                                                                                                                                                                                                                                                                                                                                                                                                                                                                                                                                                                                                                                                                                                                                                                                                                                                                                                                                                                                                                                                                                                                                                                                                                                                                                                                                                                                                                                                              | Instituto de Medicina Tropical & Salud Global Universidad Iberoamericana                                 | Grubaugh Lab - Yale School of Public Health                                                                         | Alejandro Vallejo Degaudenzi; Anderson Brito; Andrea Firpo; Annie Watkins; Chaney Kalinich; Chantal Vogels; David Rivera Aponte; Elisa Contreras; Ernesto Vazquez; Esperanza Mendoza; Fabiola Cruz-Lopez; Fabiola Fontanet; Isabel Ott; Isabel Ott; Jessica Rothman; Joseph Fauver; Karolane Gonzalez; Kendall Billig; Mallory Breban; Mary Petrone; Natalie Machargo; Nathan Grubaugh; Patricia Serrano; Robert Paulino-Ramirez; Tania Mitwalli; Tara Alpert; Tobias Koch; Vianca Aponte; Victor Virgilio Calderon                                                                                                                                                                                                                                                                                                                                                     |                                                                                                                                                                                                                              |
| EPI_ISL_1627995                                                                                                                                                                                                                                                                                                                                                                                                                                                                                                                                                                                                                                                                                                                                                                                                                                                                                                                                                                                                                                                                                                                                                                                                                                                                                                                                                                                                                                                                                                                                                                                                                                                                                                                                                                                                                                                                                                                                                                                                                                                                                                                                                                                                                                                                                                                                                                                                                                                                                                                                                                                                                                                                                                                                                                                                                                                                                                                                                                                                                                                                                                                                                                                                                                                                                                                                                                                                                                                                                                                                                                                                                                                                                                                                                                                                                                                                                                                                                                                                                                                                                                                                                                                                                                                                                                                                                                                                                                                                                                                                                                                                                                                                                                                                                                                                                                                                                                                                                                                                                                                                                                                                                                                                                                                                                                                                                                                                                                                                                                                                                                                                                                                                                                                                                                                                                                                                                                                                               | Institut Oncologii                                                                                       | 1. National Institute of Public Health - National Institute of Hygiene; 2. Eurofins Genomics Europe Sequencing GmbH | ECDC COVID-19 WGS support team; Eurofins Genomics Europe Sequencing Team; Garciazyński Rafal; Sadkowska-Todys Małgorzata; Wolkowicz Tomasz; Zacharczuk Katarzyna                                                                                                                                                                                                                                                                                                                                                                                                                                                                                                                                                                                                                                                                                                        |                                                                                                                                                                                                                              |
| EPI_ISL_1652056, EPI_ISL_1652061, EPI_ISL_1652066                                                                                                                                                                                                                                                                                                                                                                                                                                                                                                                                                                                                                                                                                                                                                                                                                                                                                                                                                                                                                                                                                                                                                                                                                                                                                                                                                                                                                                                                                                                                                                                                                                                                                                                                                                                                                                                                                                                                                                                                                                                                                                                                                                                                                                                                                                                                                                                                                                                                                                                                                                                                                                                                                                                                                                                                                                                                                                                                                                                                                                                                                                                                                                                                                                                                                                                                                                                                                                                                                                                                                                                                                                                                                                                                                                                                                                                                                                                                                                                                                                                                                                                                                                                                                                                                                                                                                                                                                                                                                                                                                                                                                                                                                                                                                                                                                                                                                                                                                                                                                                                                                                                                                                                                                                                                                                                                                                                                                                                                                                                                                                                                                                                                                                                                                                                                                                                                                                             | Integrated Biopreiosity of H3Africa Uganda - IBRH3AU                                                     | Molecular Biology Laboratory                                                                                        | Ashaba Fred Katabazi; Bernard Ssentalo Bagaya; David Patrick Kateete; Edgar Kigozi; Emmanuel Nasinghe; Eric Katagiriya; Gerald Mboowa; Lwanga Newton; Misaki Wayengera; Moses Jobola; Moses Luutu; Nsubuga Gideon; Rogers Kamulegeya; Samuel Kirimunda; Sarah Stanley; Savannah Mwesigwa                                                                                                                                                                                                                                                                                                                                                                                                                                                                                                                                                                                |                                                                                                                                                                                                                              |
| EPI_ISL_1910387, EPI_ISL_1910391, EPI_ISL_2620888, EPI_ISL_2620889, EPI_ISL_2887849, EPI_ISL_2887851, EPI_ISL_2887852, EPI_ISL_2887857, EPI_ISL_3154879, EPI_ISL_3154885, EPI_ISL_3154890, EPI_ISL_3154891, EPI_ISL_3154892, EPI_ISL_3154897, EPI_ISL_3154898, EPI_ISL_3154899                                                                                                                                                                                                                                                                                                                                                                                                                                                                                                                                                                                                                                                                                                                                                                                                                                                                                                                                                                                                                                                                                                                                                                                                                                                                                                                                                                                                                                                                                                                                                                                                                                                                                                                                                                                                                                                                                                                                                                                                                                                                                                                                                                                                                                                                                                                                                                                                                                                                                                                                                                                                                                                                                                                                                                                                                                                                                                                                                                                                                                                                                                                                                                                                                                                                                                                                                                                                                                                                                                                                                                                                                                                                                                                                                                                                                                                                                                                                                                                                                                                                                                                                                                                                                                                                                                                                                                                                                                                                                                                                                                                                                                                                                                                                                                                                                                                                                                                                                                                                                                                                                                                                                                                                                                                                                                                                                                                                                                                                                                                                                                                                                                                                                |                                                                                                          |                                                                                                                     |                                                                                                                                                                                                                                                                                                                                                                                                                                                                                                                                                                                                                                                                                                                                                                                                                                                                         |                                                                                                                                                                                                                              |
| see above                                                                                                                                                                                                                                                                                                                                                                                                                                                                                                                                                                                                                                                                                                                                                                                                                                                                                                                                                                                                                                                                                                                                                                                                                                                                                                                                                                                                                                                                                                                                                                                                                                                                                                                                                                                                                                                                                                                                                                                                                                                                                                                                                                                                                                                                                                                                                                                                                                                                                                                                                                                                                                                                                                                                                                                                                                                                                                                                                                                                                                                                                                                                                                                                                                                                                                                                                                                                                                                                                                                                                                                                                                                                                                                                                                                                                                                                                                                                                                                                                                                                                                                                                                                                                                                                                                                                                                                                                                                                                                                                                                                                                                                                                                                                                                                                                                                                                                                                                                                                                                                                                                                                                                                                                                                                                                                                                                                                                                                                                                                                                                                                                                                                                                                                                                                                                                                                                                                                                     | Iressef Genomics lab                                                                                     | IRÉSSEF                                                                                                             | Abdou PADANE; Amroise AHOUIDI; Aminata DIA; Aminata MBOUP; Astou Gaye GAYE; Barada CISSE; Biraïm Piere NDIAYE; Diabou Diagne; Gora LO; Khadim GUÉYÉ; Moustapha MBOW; Nafisatou LEYÉ; Ndeye Coumba Toure KANE; Papa Alassane DIAW; Samba Ndiour; Sani Ndiaye; Souleymane MBOUP; Yacine DIA                                                                                                                                                                                                                                                                                                                                                                                                                                                                                                                                                                               |                                                                                                                                                                                                                              |
| EPI_ISL_483708, EPI_ISL_514293, EPI_ISL_514305, EPI_ISL_514308, EPI_ISL_516900, EPI_ISL_649094                                                                                                                                                                                                                                                                                                                                                                                                                                                                                                                                                                                                                                                                                                                                                                                                                                                                                                                                                                                                                                                                                                                                                                                                                                                                                                                                                                                                                                                                                                                                                                                                                                                                                                                                                                                                                                                                                                                                                                                                                                                                                                                                                                                                                                                                                                                                                                                                                                                                                                                                                                                                                                                                                                                                                                                                                                                                                                                                                                                                                                                                                                                                                                                                                                                                                                                                                                                                                                                                                                                                                                                                                                                                                                                                                                                                                                                                                                                                                                                                                                                                                                                                                                                                                                                                                                                                                                                                                                                                                                                                                                                                                                                                                                                                                                                                                                                                                                                                                                                                                                                                                                                                                                                                                                                                                                                                                                                                                                                                                                                                                                                                                                                                                                                                                                                                                                                                | Israel Central Virology laboratory                                                                       | Israel Central Virology laboratory                                                                                  |                                                                                                                                                                                                                                                                                                                                                                                                                                                                                                                                                                                                                                                                                                                                                                                                                                                                         | Efrat Dahan Bucris; Ella Mendelson; Michal Mandelboim; Neta Zuckerman; Oran Erster                                                                                                                                           |
| EPI_ISL_2183422, EPI_ISL_2183433, EPI_ISL_2636159                                                                                                                                                                                                                                                                                                                                                                                                                                                                                                                                                                                                                                                                                                                                                                                                                                                                                                                                                                                                                                                                                                                                                                                                                                                                                                                                                                                                                                                                                                                                                                                                                                                                                                                                                                                                                                                                                                                                                                                                                                                                                                                                                                                                                                                                                                                                                                                                                                                                                                                                                                                                                                                                                                                                                                                                                                                                                                                                                                                                                                                                                                                                                                                                                                                                                                                                                                                                                                                                                                                                                                                                                                                                                                                                                                                                                                                                                                                                                                                                                                                                                                                                                                                                                                                                                                                                                                                                                                                                                                                                                                                                                                                                                                                                                                                                                                                                                                                                                                                                                                                                                                                                                                                                                                                                                                                                                                                                                                                                                                                                                                                                                                                                                                                                                                                                                                                                                                             | Israel Central Virology laboratory                                                                       | Israel National Consortium for SARS-CoV-2 sequencing                                                                |                                                                                                                                                                                                                                                                                                                                                                                                                                                                                                                                                                                                                                                                                                                                                                                                                                                                         | Dana Bar-Ilan; Efrat Dahan Bucris; Efrat Glick-Saar; Ella Mendelson; Gideon Rechavi; Michal Mandelboim; Miranda Geva; Neta Zuckerman; Netanel Abu; Omri Nayshool; Oran Erster; Orna Mor                                      |
| EPI_ISL_3275790                                                                                                                                                                                                                                                                                                                                                                                                                                                                                                                                                                                                                                                                                                                                                                                                                                                                                                                                                                                                                                                                                                                                                                                                                                                                                                                                                                                                                                                                                                                                                                                                                                                                                                                                                                                                                                                                                                                                                                                                                                                                                                                                                                                                                                                                                                                                                                                                                                                                                                                                                                                                                                                                                                                                                                                                                                                                                                                                                                                                                                                                                                                                                                                                                                                                                                                                                                                                                                                                                                                                                                                                                                                                                                                                                                                                                                                                                                                                                                                                                                                                                                                                                                                                                                                                                                                                                                                                                                                                                                                                                                                                                                                                                                                                                                                                                                                                                                                                                                                                                                                                                                                                                                                                                                                                                                                                                                                                                                                                                                                                                                                                                                                                                                                                                                                                                                                                                                                                               | JIPMER Puducherry                                                                                        | inStem NCBS - INSACOG                                                                                               |                                                                                                                                                                                                                                                                                                                                                                                                                                                                                                                                                                                                                                                                                                                                                                                                                                                                         | Uma Ramakrishnan Dasaradhi Palakodeti Aswin SaiNarain                                                                                                                                                                        |
| EPI_ISL_779272, EPI_ISL_2811827                                                                                                                                                                                                                                                                                                                                                                                                                                                                                                                                                                                                                                                                                                                                                                                                                                                                                                                                                                                                                                                                                                                                                                                                                                                                                                                                                                                                                                                                                                                                                                                                                                                                                                                                                                                                                                                                                                                                                                                                                                                                                                                                                                                                                                                                                                                                                                                                                                                                                                                                                                                                                                                                                                                                                                                                                                                                                                                                                                                                                                                                                                                                                                                                                                                                                                                                                                                                                                                                                                                                                                                                                                                                                                                                                                                                                                                                                                                                                                                                                                                                                                                                                                                                                                                                                                                                                                                                                                                                                                                                                                                                                                                                                                                                                                                                                                                                                                                                                                                                                                                                                                                                                                                                                                                                                                                                                                                                                                                                                                                                                                                                                                                                                                                                                                                                                                                                                                                               | Jamil-ur-Rahman Center for Genome Research, Dr. Panjwani Center for Molecular Medicine and Drug Research | Jamil-ur-Rahman Center for Genome Research, Dr. Panjwani Center for Molecular Medicine and Drug Research            |                                                                                                                                                                                                                                                                                                                                                                                                                                                                                                                                                                                                                                                                                                                                                                                                                                                                         | Ain, Nu.; Ansari, S.; B.T.; I.A.; Iqbal, W.; Irfan, M.; Jahan, S.; Javed; Kakar, N.; Khan, Khan, I.; Khan, S.; Nisa, Z.; Nisa, Zu.; Rashid, M.; Rehman, Z.; Sarwar, B.; Shakeel, M.; Siddiqi, S.; Zehra, M.                  |
| EPI_ISL_3031422, EPI_ISL_3031423, EPI_ISL_3031425, EPI_ISL_3031426, EPI_ISL_3031427, EPI_ISL_3031430, EPI_ISL_3031431                                                                                                                                                                                                                                                                                                                                                                                                                                                                                                                                                                                                                                                                                                                                                                                                                                                                                                                                                                                                                                                                                                                                                                                                                                                                                                                                                                                                                                                                                                                                                                                                                                                                                                                                                                                                                                                                                                                                                                                                                                                                                                                                                                                                                                                                                                                                                                                                                                                                                                                                                                                                                                                                                                                                                                                                                                                                                                                                                                                                                                                                                                                                                                                                                                                                                                                                                                                                                                                                                                                                                                                                                                                                                                                                                                                                                                                                                                                                                                                                                                                                                                                                                                                                                                                                                                                                                                                                                                                                                                                                                                                                                                                                                                                                                                                                                                                                                                                                                                                                                                                                                                                                                                                                                                                                                                                                                                                                                                                                                                                                                                                                                                                                                                                                                                                                                                         |                                                                                                          |                                                                                                                     |                                                                                                                                                                                                                                                                                                                                                                                                                                                                                                                                                                                                                                                                                                                                                                                                                                                                         |                                                                                                                                                                                                                              |
| see above                                                                                                                                                                                                                                                                                                                                                                                                                                                                                                                                                                                                                                                                                                                                                                                                                                                                                                                                                                                                                                                                                                                                                                                                                                                                                                                                                                                                                                                                                                                                                                                                                                                                                                                                                                                                                                                                                                                                                                                                                                                                                                                                                                                                                                                                                                                                                                                                                                                                                                                                                                                                                                                                                                                                                                                                                                                                                                                                                                                                                                                                                                                                                                                                                                                                                                                                                                                                                                                                                                                                                                                                                                                                                                                                                                                                                                                                                                                                                                                                                                                                                                                                                                                                                                                                                                                                                                                                                                                                                                                                                                                                                                                                                                                                                                                                                                                                                                                                                                                                                                                                                                                                                                                                                                                                                                                                                                                                                                                                                                                                                                                                                                                                                                                                                                                                                                                                                                                                                     | Jaramogi Oginga Odinga Teaching and Referral Hospital                                                    | USAMRD-A, Basic Science Laboratory                                                                                  |                                                                                                                                                                                                                                                                                                                                                                                                                                                                                                                                                                                                                                                                                                                                                                                                                                                                         | Alan Lemtudo; Beth Mutai; Brian Andika; Carol Kifude; Clement Masakwe; Eric Muthanje; Esther Omuseni; Faith Sigei; Gathii Kimita; George Awinda; John Waitumbi; Josphat Nyataya; Rachel Githii; Rehema Liyai; Stephen Ochola |
| EPI_ISL_949093                                                                                                                                                                                                                                                                                                                                                                                                                                                                                                                                                                                                                                                                                                                                                                                                                                                                                                                                                                                                                                                                                                                                                                                                                                                                                                                                                                                                                                                                                                                                                                                                                                                                                                                                                                                                                                                                                                                                                                                                                                                                                                                                                                                                                                                                                                                                                                                                                                                                                                                                                                                                                                                                                                                                                                                                                                                                                                                                                                                                                                                                                                                                                                                                                                                                                                                                                                                                                                                                                                                                                                                                                                                                                                                                                                                                                                                                                                                                                                                                                                                                                                                                                                                                                                                                                                                                                                                                                                                                                                                                                                                                                                                                                                                                                                                                                                                                                                                                                                                                                                                                                                                                                                                                                                                                                                                                                                                                                                                                                                                                                                                                                                                                                                                                                                                                                                                                                                                                                | Jessa                                                                                                    | Jessa                                                                                                               |                                                                                                                                                                                                                                                                                                                                                                                                                                                                                                                                                                                                                                                                                                                                                                                                                                                                         | Jessa_cmdLab                                                                                                                                                                                                                 |
| EPI_ISL_2932611, EPI_ISL_2932618                                                                                                                                                                                                                                                                                                                                                                                                                                                                                                                                                                                                                                                                                                                                                                                                                                                                                                                                                                                                                                                                                                                                                                                                                                                                                                                                                                                                                                                                                                                                                                                                                                                                                                                                                                                                                                                                                                                                                                                                                                                                                                                                                                                                                                                                                                                                                                                                                                                                                                                                                                                                                                                                                                                                                                                                                                                                                                                                                                                                                                                                                                                                                                                                                                                                                                                                                                                                                                                                                                                                                                                                                                                                                                                                                                                                                                                                                                                                                                                                                                                                                                                                                                                                                                                                                                                                                                                                                                                                                                                                                                                                                                                                                                                                                                                                                                                                                                                                                                                                                                                                                                                                                                                                                                                                                                                                                                                                                                                                                                                                                                                                                                                                                                                                                                                                                                                                                                                              | Jordan University of Science Technology/ Irbid filed Hospital/ MOH                                       | Princess Haya Biotechnology Center/ Jordan University of Science Technology                                         |                                                                                                                                                                                                                                                                                                                                                                                                                                                                                                                                                                                                                                                                                                                                                                                                                                                                         | Areej Alquran; Emad Abu Yaqeen; Hazem Haddad; Maha Karam; Saied Jaradat; Shereen Issa; Suha Hasan                                                                                                                            |
| EPI_ISL_3275167                                                                                                                                                                                                                                                                                                                                                                                                                                                                                                                                                                                                                                                                                                                                                                                                                                                                                                                                                                                                                                                                                                                                                                                                                                                                                                                                                                                                                                                                                                                                                                                                                                                                                                                                                                                                                                                                                                                                                                                                                                                                                                                                                                                                                                                                                                                                                                                                                                                                                                                                                                                                                                                                                                                                                                                                                                                                                                                                                                                                                                                                                                                                                                                                                                                                                                                                                                                                                                                                                                                                                                                                                                                                                                                                                                                                                                                                                                                                                                                                                                                                                                                                                                                                                                                                                                                                                                                                                                                                                                                                                                                                                                                                                                                                                                                                                                                                                                                                                                                                                                                                                                                                                                                                                                                                                                                                                                                                                                                                                                                                                                                                                                                                                                                                                                                                                                                                                                                                               | K. Himmafushi                                                                                            | Indira Gandhi Memorial Hospital                                                                                     |                                                                                                                                                                                                                                                                                                                                                                                                                                                                                                                                                                                                                                                                                                                                                                                                                                                                         | Dr. Milza Abdul Muhsin; Mr. Ibrahim Nishan Ahmed; Ms. Aishath Shuhudha; Ms. Aminath Nazfa; Ms. Fathimath Zimna                                                                                                               |
| EPI_ISL_3275170                                                                                                                                                                                                                                                                                                                                                                                                                                                                                                                                                                                                                                                                                                                                                                                                                                                                                                                                                                                                                                                                                                                                                                                                                                                                                                                                                                                                                                                                                                                                                                                                                                                                                                                                                                                                                                                                                                                                                                                                                                                                                                                                                                                                                                                                                                                                                                                                                                                                                                                                                                                                                                                                                                                                                                                                                                                                                                                                                                                                                                                                                                                                                                                                                                                                                                                                                                                                                                                                                                                                                                                                                                                                                                                                                                                                                                                                                                                                                                                                                                                                                                                                                                                                                                                                                                                                                                                                                                                                                                                                                                                                                                                                                                                                                                                                                                                                                                                                                                                                                                                                                                                                                                                                                                                                                                                                                                                                                                                                                                                                                                                                                                                                                                                                                                                                                                                                                                                                               | K. Maafushi                                                                                              | Indira Gandhi Memorial Hospital                                                                                     |                                                                                                                                                                                                                                                                                                                                                                                                                                                                                                                                                                                                                                                                                                                                                                                                                                                                         | Dr. Milza Abdul Muhsin; Mr. Ibrahim Nishan Ahmed; Ms. Aishath Shuhudha; Ms. Aminath Nazfa; Ms. Fathimath Zimna                                                                                                               |
| EPI_ISL_2779335                                                                                                                                                                                                                                                                                                                                                                                                                                                                                                                                                                                                                                                                                                                                                                                                                                                                                                                                                                                                                                                                                                                                                                                                                                                                                                                                                                                                                                                                                                                                                                                                                                                                                                                                                                                                                                                                                                                                                                                                                                                                                                                                                                                                                                                                                                                                                                                                                                                                                                                                                                                                                                                                                                                                                                                                                                                                                                                                                                                                                                                                                                                                                                                                                                                                                                                                                                                                                                                                                                                                                                                                                                                                                                                                                                                                                                                                                                                                                                                                                                                                                                                                                                                                                                                                                                                                                                                                                                                                                                                                                                                                                                                                                                                                                                                                                                                                                                                                                                                                                                                                                                                                                                                                                                                                                                                                                                                                                                                                                                                                                                                                                                                                                                                                                                                                                                                                                                                                               | KCRH KEMRI-DEID Surveillance Site                                                                        | USAMRD-A, Basic Science Laboratory                                                                                  |                                                                                                                                                                                                                                                                                                                                                                                                                                                                                                                                                                                                                                                                                                                                                                                                                                                                         | Alan Lemtudo; Beth Mutai; Brian Andika; Carol Kifude; Clement Masakwe; Eric Muthanje; Esther Omuseni; Faith Sigei; Gathii Kimita; George Awinda; John Waitumbi; Josphat Nyataya; Rachel Githii; Rehema Liyai; Stephen Ochola |
| EPI_ISL_2779331, EPI_ISL_2779466, EPI_ISL_2779546, EPI_ISL_2779547, EPI_ISL_3031382, EPI_ISL_3031383, EPI_ISL_3031386, EPI_ISL_3031387, EPI_ISL_3031401, EPI_ISL_3031407, EPI_ISL_3031409, EPI_ISL_3031410, EPI_ISL_3031416                                                                                                                                                                                                                                                                                                                                                                                                                                                                                                                                                                                                                                                                                                                                                                                                                                                                                                                                                                                                                                                                                                                                                                                                                                                                                                                                                                                                                                                                                                                                                                                                                                                                                                                                                                                                                                                                                                                                                                                                                                                                                                                                                                                                                                                                                                                                                                                                                                                                                                                                                                                                                                                                                                                                                                                                                                                                                                                                                                                                                                                                                                                                                                                                                                                                                                                                                                                                                                                                                                                                                                                                                                                                                                                                                                                                                                                                                                                                                                                                                                                                                                                                                                                                                                                                                                                                                                                                                                                                                                                                                                                                                                                                                                                                                                                                                                                                                                                                                                                                                                                                                                                                                                                                                                                                                                                                                                                                                                                                                                                                                                                                                                                                                                                                   | KCRH KEMRI/DEID Surveillance Site                                                                        | USAMRD-A, Basic Science Laboratory                                                                                  |                                                                                                                                                                                                                                                                                                                                                                                                                                                                                                                                                                                                                                                                                                                                                                                                                                                                         | Alan Lemtudo; Beth Mutai; Brian Andika; Carol Kifude; Clement Masakwe; Eric Muthanje; Esther Omuseni; Faith Sigei; Gathii Kimita; George Awinda; John Waitumbi; Josphat Nyataya; Rachel Githii; Rehema Liyai; Stephen Ochola |
| see above                                                                                                                                                                                                                                                                                                                                                                                                                                                                                                                                                                                                                                                                                                                                                                                                                                                                                                                                                                                                                                                                                                                                                                                                                                                                                                                                                                                                                                                                                                                                                                                                                                                                                                                                                                                                                                                                                                                                                                                                                                                                                                                                                                                                                                                                                                                                                                                                                                                                                                                                                                                                                                                                                                                                                                                                                                                                                                                                                                                                                                                                                                                                                                                                                                                                                                                                                                                                                                                                                                                                                                                                                                                                                                                                                                                                                                                                                                                                                                                                                                                                                                                                                                                                                                                                                                                                                                                                                                                                                                                                                                                                                                                                                                                                                                                                                                                                                                                                                                                                                                                                                                                                                                                                                                                                                                                                                                                                                                                                                                                                                                                                                                                                                                                                                                                                                                                                                                                                                     | KCRH KEMRI/DEID Surveillance Site                                                                        | USAMRD-A, Basic Science Laboratory                                                                                  |                                                                                                                                                                                                                                                                                                                                                                                                                                                                                                                                                                                                                                                                                                                                                                                                                                                                         | Alan Lemtudo; Beth Mutai; Brian Andika; Carol Kifude; Clement Masakwe; Eric Muthanje; Esther Omuseni; Faith Sigei; Gathii Kimita; George Awinda; John Waitumbi; Josphat Nyataya; Rachel Githii; Rehema Liyai; Stephen Ochola |
| EPI_ISL_2348627, EPI_ISL_2348630                                                                                                                                                                                                                                                                                                                                                                                                                                                                                                                                                                                                                                                                                                                                                                                                                                                                                                                                                                                                                                                                                                                                                                                                                                                                                                                                                                                                                                                                                                                                                                                                                                                                                                                                                                                                                                                                                                                                                                                                                                                                                                                                                                                                                                                                                                                                                                                                                                                                                                                                                                                                                                                                                                                                                                                                                                                                                                                                                                                                                                                                                                                                                                                                                                                                                                                                                                                                                                                                                                                                                                                                                                                                                                                                                                                                                                                                                                                                                                                                                                                                                                                                                                                                                                                                                                                                                                                                                                                                                                                                                                                                                                                                                                                                                                                                                                                                                                                                                                                                                                                                                                                                                                                                                                                                                                                                                                                                                                                                                                                                                                                                                                                                                                                                                                                                                                                                                                                              | KEMRI                                                                                                    | KEMRI & ICGEB                                                                                                       |                                                                                                                                                                                                                                                                                                                                                                                                                                                                                                                                                                                                                                                                                                                                                                                                                                                                         | Alessandro Marcello; Emanuele Orsini; Eric A Lelo; Janet Majanja; Samuel L Symekher; Silvanos M Opanda; Wadegu Meshack; Wallace D Bulimo                                                                                     |
| EPI_ISL_2602986, EPI_ISL_2602987, EPI_ISL_2602988, EPI_ISL_2602990, EPI_ISL_2602991, EPI_ISL_2602992                                                                                                                                                                                                                                                                                                                                                                                                                                                                                                                                                                                                                                                                                                                                                                                                                                                                                                                                                                                                                                                                                                                                                                                                                                                                                                                                                                                                                                                                                                                                                                                                                                                                                                                                                                                                                                                                                                                                                                                                                                                                                                                                                                                                                                                                                                                                                                                                                                                                                                                                                                                                                                                                                                                                                                                                                                                                                                                                                                                                                                                                                                                                                                                                                                                                                                                                                                                                                                                                                                                                                                                                                                                                                                                                                                                                                                                                                                                                                                                                                                                                                                                                                                                                                                                                                                                                                                                                                                                                                                                                                                                                                                                                                                                                                                                                                                                                                                                                                                                                                                                                                                                                                                                                                                                                                                                                                                                                                                                                                                                                                                                                                                                                                                                                                                                                                                                          | KEMRI Center for Biotechnology Research and Development                                                  | KEMRI-Wellcome Trust Research Programme,Kilifi                                                                      |                                                                                                                                                                                                                                                                                                                                                                                                                                                                                                                                                                                                                                                                                                                                                                                                                                                                         | ; Githinji G.; Matoke D.; Mburu M.W.; Mohamed K.S.; Onyango C.; de Laurent Z.                                                                                                                                                |
| EPI_ISL_2602784, EPI_ISL_2602785, EPI_ISL_2602795, EPI_ISL_2602799, EPI_ISL_2602807, EPI_ISL_2602810, EPI_ISL_2602820, EPI_ISL_2602825, EPI_ISL_2602831, EPI_ISL_2602874, EPI_ISL_2602887, EPI_ISL_2602894, EPI_ISL_2602905, EPI_ISL_2602910, EPI_ISL_2602911, EPI_ISL_2602915, EPI_ISL_2602916, EPI_ISL_2602920, EPI_ISL_2602923, EPI_ISL_2602926, EPI_ISL_2602930, EPI_ISL_2602933, EPI_ISL_2602936, EPI_ISL_2602939, EPI_ISL_2602940, EPI_ISL_2602942, EPI_ISL_2602945                                                                                                                                                                                                                                                                                                                                                                                                                                                                                                                                                                                                                                                                                                                                                                                                                                                                                                                                                                                                                                                                                                                                                                                                                                                                                                                                                                                                                                                                                                                                                                                                                                                                                                                                                                                                                                                                                                                                                                                                                                                                                                                                                                                                                                                                                                                                                                                                                                                                                                                                                                                                                                                                                                                                                                                                                                                                                                                                                                                                                                                                                                                                                                                                                                                                                                                                                                                                                                                                                                                                                                                                                                                                                                                                                                                                                                                                                                                                                                                                                                                                                                                                                                                                                                                                                                                                                                                                                                                                                                                                                                                                                                                                                                                                                                                                                                                                                                                                                                                                                                                                                                                                                                                                                                                                                                                                                                                                                                                                                     | KEMRI-CGHR                                                                                               | KEMRI-Wellcome Trust Research Programme,Kilifi                                                                      |                                                                                                                                                                                                                                                                                                                                                                                                                                                                                                                                                                                                                                                                                                                                                                                                                                                                         | ; Githinji G.; Matoke D.; Mburu M.W.; Mohamed K.S.; Onyango C.; de Laurent Z.                                                                                                                                                |
| see above                                                                                                                                                                                                                                                                                                                                                                                                                                                                                                                                                                                                                                                                                                                                                                                                                                                                                                                                                                                                                                                                                                                                                                                                                                                                                                                                                                                                                                                                                                                                                                                                                                                                                                                                                                                                                                                                                                                                                                                                                                                                                                                                                                                                                                                                                                                                                                                                                                                                                                                                                                                                                                                                                                                                                                                                                                                                                                                                                                                                                                                                                                                                                                                                                                                                                                                                                                                                                                                                                                                                                                                                                                                                                                                                                                                                                                                                                                                                                                                                                                                                                                                                                                                                                                                                                                                                                                                                                                                                                                                                                                                                                                                                                                                                                                                                                                                                                                                                                                                                                                                                                                                                                                                                                                                                                                                                                                                                                                                                                                                                                                                                                                                                                                                                                                                                                                                                                                                                                     | KEMRI-CGHR                                                                                               | KEMRI-Wellcome Trust Research Programme,Kilifi                                                                      |                                                                                                                                                                                                                                                                                                                                                                                                                                                                                                                                                                                                                                                                                                                                                                                                                                                                         | ; Githinji G.; Matoke D.; Mburu M.W.; Mohamed K.S.; Onyango C.; de Laurent Z.                                                                                                                                                |
| EPI_ISL_1440087, EPI_ISL_1440090, EPI_ISL_1440096, EPI_ISL_1440118, EPI_ISL_1440172, EPI_ISL_1440284, EPI_ISL_1610420, EPI_ISL_1610444, EPI_ISL_2602494, EPI_ISL_2602544, EPI_ISL_2602546, EPI_ISL_2602547, EPI_ISL_2602548, EPI_ISL_2602549, EPI_ISL_2602550, EPI_ISL_2602551, EPI_ISL_2602557, EPI_ISL_2602565, EPI_ISL_2602570, EPI_ISL_2602571, EPI_ISL_2602577, EPI_ISL_2602579, EPI_ISL_2602580, EPI_ISL_2602583, EPI_ISL_2602585, EPI_ISL_2602589, EPI_ISL_2602590, EPI_ISL_2602595, EPI_ISL_2602597, EPI_ISL_2602599, EPI_ISL_2602600, EPI_ISL_2602601, EPI_ISL_2602604, EPI_ISL_2602606, EPI_ISL_2602608, EPI_ISL_2602610, EPI_ISL_2602623, EPI_ISL_2602625, EPI_ISL_2602626, EPI_ISL_2602627, EPI_ISL_2602628, EPI_ISL_2602629, EPI_ISL_2602635, EPI_ISL_2602637, EPI_ISL_2602639, EPI_ISL_2602650, EPI_ISL_2602652, EPI_ISL_2602653, EPI_ISL_2602655, EPI_ISL_2602661, EPI_ISL_2602663, EPI_ISL_2602664, EPI_ISL_2602665, EPI_ISL_2602666, EPI_ISL_2602667, EPI_ISL_2602670, EPI_ISL_2602671, EPI_ISL_2602676, EPI_ISL_2602678, EPI_ISL_2602680, EPI_ISL_2602681, EPI_ISL_2602684, EPI_ISL_2602685, EPI_ISL_2602686, EPI_ISL_2602688, EPI_ISL_2602689, EPI_ISL_2602690, EPI_ISL_2602693, EPI_ISL_2602695, EPI_ISL_2602696, EPI_ISL_2602697, EPI_ISL_2602698, EPI_ISL_2602699, EPI_ISL_2602700, EPI_ISL_2602707, EPI_ISL_2602714, EPI_ISL_2602719, EPI_ISL_2602724, EPI_ISL_2602746, EPI_ISL_2602749, EPI_ISL_2602753, EPI_ISL_2602755, EPI_ISL_2602761, EPI_ISL_2602994, EPI_ISL_2602996, EPI_ISL_2603010, EPI_ISL_2603036, EPI_ISL_2603038, EPI_ISL_2603039, EPI_ISL_2603040, EPI_ISL_2603041, EPI_ISL_2603043, EPI_ISL_2603044, EPI_ISL_2603045, EPI_ISL_2603047, EPI_ISL_2603048, EPI_ISL_2603049, EPI_ISL_2603050, EPI_ISL_2603051, EPI_ISL_2603052, EPI_ISL_2603053, EPI_ISL_2603054, EPI_ISL_2603055, EPI_ISL_2603060, EPI_ISL_2603063, EPI_ISL_2603065, EPI_ISL_2603066, EPI_ISL_2603067, EPI_ISL_2603068, EPI_ISL_2603069, EPI_ISL_2603105, EPI_ISL_2603108, EPI_ISL_2603110, EPI_ISL_2603113, EPI_ISL_2603114, EPI_ISL_2603115, EPI_ISL_2603116, EPI_ISL_2603117, EPI_ISL_2603118, EPI_ISL_2603119, EPI_ISL_2603121, EPI_ISL_2603122, EPI_ISL_2603123, EPI_ISL_2603124, EPI_ISL_2603125, EPI_ISL_2603126, EPI_ISL_2603127, EPI_ISL_2603128, EPI_ISL_2603129, EPI_ISL_2603130, EPI_ISL_2603131, EPI_ISL_2603132, EPI_ISL_2603133, EPI_ISL_2603134, EPI_ISL_2603135, EPI_ISL_2603136, EPI_ISL_2603137, EPI_ISL_2603138, EPI_ISL_2603139, EPI_ISL_2603140, EPI_ISL_2603141, EPI_ISL_2603142, EPI_ISL_2603143, EPI_ISL_2603144, EPI_ISL_2603145, EPI_ISL_2603146, EPI_ISL_2603147, EPI_ISL_2603148, EPI_ISL_2603149, EPI_ISL_2603150, EPI_ISL_2603151, EPI_ISL_2603152, EPI_ISL_2603153, EPI_ISL_2603154, EPI_ISL_2603155, EPI_ISL_2603156, EPI_ISL_2603157, EPI_ISL_2603158, EPI_ISL_2603159, EPI_ISL_2603160, EPI_ISL_2603161, EPI_ISL_2603162, EPI_ISL_2603163, EPI_ISL_2603164, EPI_ISL_2603165, EPI_ISL_2603166, EPI_ISL_2603167, EPI_ISL_2603168, EPI_ISL_2603169, EPI_ISL_2603170, EPI_ISL_2603171, EPI_ISL_2603172, EPI_ISL_2603173, EPI_ISL_2603174, EPI_ISL_2603175, EPI_ISL_2603176, EPI_ISL_2603177                                                                                                                                                                                                                                                                                                                                                                                                                                                                                                                                                                                                                                                                                                                                                                                                                                                                                                                                                                                                                                                                                                                                                                                                                                                                                                                                                                                                                                                                                                                                                                                                                                                                                                                                                                                                                                                                                                                                                                                                                                                                                                                                                                                                                                                                                                                                                                                                                                                                                                                                                                                                                                                                                                                                                                                                                               |                                                                                                          |                                                                                                                     |                                                                                                                                                                                                                                                                                                                                                                                                                                                                                                                                                                                                                                                                                                                                                                                                                                                                         |                                                                                                                                                                                                                              |
| see above                                                                                                                                                                                                                                                                                                                                                                                                                                                                                                                                                                                                                                                                                                                                                                                                                                                                                                                                                                                                                                                                                                                                                                                                                                                                                                                                                                                                                                                                                                                                                                                                                                                                                                                                                                                                                                                                                                                                                                                                                                                                                                                                                                                                                                                                                                                                                                                                                                                                                                                                                                                                                                                                                                                                                                                                                                                                                                                                                                                                                                                                                                                                                                                                                                                                                                                                                                                                                                                                                                                                                                                                                                                                                                                                                                                                                                                                                                                                                                                                                                                                                                                                                                                                                                                                                                                                                                                                                                                                                                                                                                                                                                                                                                                                                                                                                                                                                                                                                                                                                                                                                                                                                                                                                                                                                                                                                                                                                                                                                                                                                                                                                                                                                                                                                                                                                                                                                                                                                     | KEMRI-Wellcome Trust Research Programme,Kilifi                                                           | KEMRI-Wellcome Trust Research Programme,Kilifi                                                                      |                                                                                                                                                                                                                                                                                                                                                                                                                                                                                                                                                                                                                                                                                                                                                                                                                                                                         | ; Githinji G.; Matoke D.; Mburu M.W.; Mohamed K.S.; Onyango C.; Thiongo K.; de Laurent Z.; deLaurent Z.                                                                                                                      |
| EPI_ISL_568705, EPI_ISL_568801, EPI_ISL_568803, EPI_ISL_568815, EPI_ISL_806574, EPI_ISL_806575, EPI_ISL_806611, EPI_ISL_806644, EPI_ISL_806665, EPI_ISL_806667, EPI_ISL_806670, EPI_ISL_806701, EPI_ISL_806707, EPI_ISL_806709, EPI_ISL_855535, EPI_ISL_855544, EPI_ISL_968810, EPI_ISL_968882, EPI_ISL_968884, EPI_ISL_968897, EPI_ISL_968911, EPI_ISL_968913, EPI_ISL_968955, EPI_ISL_968998, EPI_ISL_969001, EPI_ISL_969018, EPI_ISL_969074, EPI_ISL_1039228                                                                                                                                                                                                                                                                                                                                                                                                                                                                                                                                                                                                                                                                                                                                                                                                                                                                                                                                                                                                                                                                                                                                                                                                                                                                                                                                                                                                                                                                                                                                                                                                                                                                                                                                                                                                                                                                                                                                                                                                                                                                                                                                                                                                                                                                                                                                                                                                                                                                                                                                                                                                                                                                                                                                                                                                                                                                                                                                                                                                                                                                                                                                                                                                                                                                                                                                                                                                                                                                                                                                                                                                                                                                                                                                                                                                                                                                                                                                                                                                                                                                                                                                                                                                                                                                                                                                                                                                                                                                                                                                                                                                                                                                                                                                                                                                                                                                                                                                                                                                                                                                                                                                                                                                                                                                                                                                                                                                                                                                                               |                                                                                                          |                                                                                                                     |                                                                                                                                                                                                                                                                                                                                                                                                                                                                                                                                                                                                                                                                                                                                                                                                                                                                         |                                                                                                                                                                                                                              |
| see above                                                                                                                                                                                                                                                                                                                                                                                                                                                                                                                                                                                                                                                                                                                                                                                                                                                                                                                                                                                                                                                                                                                                                                                                                                                                                                                                                                                                                                                                                                                                                                                                                                                                                                                                                                                                                                                                                                                                                                                                                                                                                                                                                                                                                                                                                                                                                                                                                                                                                                                                                                                                                                                                                                                                                                                                                                                                                                                                                                                                                                                                                                                                                                                                                                                                                                                                                                                                                                                                                                                                                                                                                                                                                                                                                                                                                                                                                                                                                                                                                                                                                                                                                                                                                                                                                                                                                                                                                                                                                                                                                                                                                                                                                                                                                                                                                                                                                                                                                                                                                                                                                                                                                                                                                                                                                                                                                                                                                                                                                                                                                                                                                                                                                                                                                                                                                                                                                                                                                     | KEMRI-Wellcome Trust Research Programme/KEMRI-CGMR-C Kilifi                                              | KEMRI-Wellcome Trust Research Programme/KEMRI-CGMR-C Kilifi                                                         |                                                                                                                                                                                                                                                                                                                                                                                                                                                                                                                                                                                                                                                                                                                                                                                                                                                                         | Githinji et al; Githinji et al 2020                                                                                                                                                                                          |
| EPI_ISL_2779322                                                                                                                                                                                                                                                                                                                                                                                                                                                                                                                                                                                                                                                                                                                                                                                                                                                                                                                                                                                                                                                                                                                                                                                                                                                                                                                                                                                                                                                                                                                                                                                                                                                                                                                                                                                                                                                                                                                                                                                                                                                                                                                                                                                                                                                                                                                                                                                                                                                                                                                                                                                                                                                                                                                                                                                                                                                                                                                                                                                                                                                                                                                                                                                                                                                                                                                                                                                                                                                                                                                                                                                                                                                                                                                                                                                                                                                                                                                                                                                                                                                                                                                                                                                                                                                                                                                                                                                                                                                                                                                                                                                                                                                                                                                                                                                                                                                                                                                                                                                                                                                                                                                                                                                                                                                                                                                                                                                                                                                                                                                                                                                                                                                                                                                                                                                                                                                                                                                                               | KEMRI/DEID Surveillance Site (Isebani Sub-County Hospital)                                               | USAMRD-A, Basic Science Laboratory                                                                                  |                                                                                                                                                                                                                                                                                                                                                                                                                                                                                                                                                                                                                                                                                                                                                                                                                                                                         | Alan Lemtudo; Beth Mutai; Brian Andika; Carol Kifude; Clement Masakwe; Eric Muthanje; Esther Omuseni; Faith Sigei; Gathii Kimita; George Awinda; John Waitumbi; Josphat Nyataya; Rachel Githii; Rehema Liyai; Stephen Ochola |
| EPI_ISL_3031403, EPI_ISL_3031404, EPI_ISL_3031405                                                                                                                                                                                                                                                                                                                                                                                                                                                                                                                                                                                                                                                                                                                                                                                                                                                                                                                                                                                                                                                                                                                                                                                                                                                                                                                                                                                                                                                                                                                                                                                                                                                                                                                                                                                                                                                                                                                                                                                                                                                                                                                                                                                                                                                                                                                                                                                                                                                                                                                                                                                                                                                                                                                                                                                                                                                                                                                                                                                                                                                                                                                                                                                                                                                                                                                                                                                                                                                                                                                                                                                                                                                                                                                                                                                                                                                                                                                                                                                                                                                                                                                                                                                                                                                                                                                                                                                                                                                                                                                                                                                                                                                                                                                                                                                                                                                                                                                                                                                                                                                                                                                                                                                                                                                                                                                                                                                                                                                                                                                                                                                                                                                                                                                                                                                                                                                                                                             | KEMRI/DEID Surveillance Site (Kombewa Sub County Hospital)                                               | USAMRD-A, Basic Science Laboratory                                                                                  |                                                                                                                                                                                                                                                                                                                                                                                                                                                                                                                                                                                                                                                                                                                                                                                                                                                                         | Alan Lemtudo; Beth Mutai; Brian Andika; Carol Kifude; Clement Masakwe; Eric Muthanje; Esther Omuseni; Faith Sigei; Gathii Kimita; George Awinda; John Waitumbi; Josphat Nyataya; Rachel Githii; Rehema Liyai; Stephen Ochola |
| EPI_ISL_2779374, EPI_ISL_2779375                                                                                                                                                                                                                                                                                                                                                                                                                                                                                                                                                                                                                                                                                                                                                                                                                                                                                                                                                                                                                                                                                                                                                                                                                                                                                                                                                                                                                                                                                                                                                                                                                                                                                                                                                                                                                                                                                                                                                                                                                                                                                                                                                                                                                                                                                                                                                                                                                                                                                                                                                                                                                                                                                                                                                                                                                                                                                                                                                                                                                                                                                                                                                                                                                                                                                                                                                                                                                                                                                                                                                                                                                                                                                                                                                                                                                                                                                                                                                                                                                                                                                                                                                                                                                                                                                                                                                                                                                                                                                                                                                                                                                                                                                                                                                                                                                                                                                                                                                                                                                                                                                                                                                                                                                                                                                                                                                                                                                                                                                                                                                                                                                                                                                                                                                                                                                                                                                                                              | KEMRI/DEID Surveillance Site (Lamu County Hospital)                                                      | USAMRD-A, Basic Science Laboratory                                                                                  |                                                                                                                                                                                                                                                                                                                                                                                                                                                                                                                                                                                                                                                                                                                                                                                                                                                                         | Alan Lemtudo; Beth Mutai; Brian Andika; Carol Kifude; Clement Masakwe; Eric Muthanje; Esther Omuseni; Faith Sigei; Gathii Kimita; George Awinda; John Waitumbi; Josphat Nyataya; Rachel Githii; Rehema Liyai; Stephen Ochola |
| EPI_ISL_2779376                                                                                                                                                                                                                                                                                                                                                                                                                                                                                                                                                                                                                                                                                                                                                                                                                                                                                                                                                                                                                                                                                                                                                                                                                                                                                                                                                                                                                                                                                                                                                                                                                                                                                                                                                                                                                                                                                                                                                                                                                                                                                                                                                                                                                                                                                                                                                                                                                                                                                                                                                                                                                                                                                                                                                                                                                                                                                                                                                                                                                                                                                                                                                                                                                                                                                                                                                                                                                                                                                                                                                                                                                                                                                                                                                                                                                                                                                                                                                                                                                                                                                                                                                                                                                                                                                                                                                                                                                                                                                                                                                                                                                                                                                                                                                                                                                                                                                                                                                                                                                                                                                                                                                                                                                                                                                                                                                                                                                                                                                                                                                                                                                                                                                                                                                                                                                                                                                                                                               | KEMRI/DEID Surveillance Site (Mtwonge Navy Base Hospital)                                                | USAMRD-A, Basic Science Laboratory                                                                                  |                                                                                                                                                                                                                                                                                                                                                                                                                                                                                                                                                                                                                                                                                                                                                                                                                                                                         | Alan Lemtudo; Beth Mutai; Brian Andika; Carol Kifude; Clement Masakwe; Eric Muthanje; Esther Omuseni; Faith Sigei; Gathii Kimita; George Awinda; John Waitumbi; Josphat Nyataya; Rachel Githii; Rehema Liyai; Stephen Ochola |
| EPI_ISL_2382192, EPI_ISL_2382203, EPI_ISL_2382205, EPI_ISL_2382206, EPI_ISL_2382208, EPI_ISL_2382209, EPI_ISL_2382211, EPI_ISL_2382212, EPI_ISL_2382215, EPI_ISL_2382223, EPI_ISL_2382699, EPI_ISL_2382700, EPI_ISL_2382701, EPI_ISL_2382709, EPI_ISL_2382712, EPI_ISL_2382717, EPI_ISL_2382718, EPI_ISL_2582843, EPI_ISL_2582848, EPI_ISL_2582868, EPI_ISL_2582872, EPI_ISL_2662665, EPI_ISL_2662668, EPI_ISL_2662670, EPI_ISL_2662671, EPI_ISL_2662672, EPI_ISL_2662673, EPI_ISL_2662680, EPI_ISL_2662683, EPI_ISL_2662691, EPI_ISL_2662694, EPI_ISL_2662695, EPI_ISL_2662696, EPI_ISL_2662700, EPI_ISL_2662704, EPI_ISL_2662705, EPI_ISL_2662706, EPI_ISL_2662707, EPI_ISL_2662708, EPI_ISL_2662709, EPI_ISL_2662710, EPI_ISL_2662711, EPI_ISL_2662712, EPI_ISL_2662713, EPI_ISL_2662714, EPI_ISL_2662715, EPI_ISL_2662716, EPI_ISL_2662717, EPI_ISL_2662718, EPI_ISL_2662719, EPI_ISL_2662720, EPI_ISL_2662721, EPI_ISL_2662722, EPI_ISL_2662723, EPI_ISL_2662724, EPI_ISL_2662725, EPI_ISL_2662726, EPI_ISL_2662727, EPI_ISL_2662728, EPI_ISL_2662729, EPI_ISL_2662730, EPI_ISL_2662731, EPI_ISL_2662732, EPI_ISL_2662733, EPI_ISL_2662734, EPI_ISL_2662735, EPI_ISL_2662736, EPI_ISL_2662737, EPI_ISL_2662738, EPI_ISL_2662739, EPI_ISL_2662740, EPI_ISL_2662741, EPI_ISL_2662742, EPI_ISL_2662743, EPI_ISL_2662744, EPI_ISL_2662745, EPI_ISL_2662746, EPI_ISL_2662747, EPI_ISL_2662748, EPI_ISL_2662749, EPI_ISL_2662750, EPI_ISL_2662751, EPI_ISL_2662752, EPI_ISL_2662753, EPI_ISL_2662754, EPI_ISL_2662755, EPI_ISL_2662756, EPI_ISL_2662757, EPI_ISL_2662758, EPI_ISL_2662759, EPI_ISL_2662760, EPI_ISL_2662761, EPI_ISL_2662762, EPI_ISL_2662763, EPI_ISL_2662764, EPI_ISL_2662765, EPI_ISL_2662766, EPI_ISL_2662767, EPI_ISL_2662768, EPI_ISL_2662769, EPI_ISL_2662770, EPI_ISL_2662771, EPI_ISL_2662772, EPI_ISL_2662773, EPI_ISL_2662774, EPI_ISL_2662775, EPI_ISL_2662776, EPI_ISL_2662777, EPI_ISL_2662778, EPI_ISL_2662779, EPI_ISL_2662780, EPI_ISL_2662781, EPI_ISL_2662782, EPI_ISL_2662783, EPI_ISL_2662784, EPI_ISL_2662785, EPI_ISL_2662786, EPI_ISL_2662787, EPI_ISL_2662788, EPI_ISL_2662789, EPI_ISL_2662790, EPI_ISL_2662791, EPI_ISL_2662792, EPI_ISL_2662793, EPI_ISL_2662794, EPI_ISL_2662795, EPI_ISL_2662796, EPI_ISL_2662797, EPI_ISL_2662798, EPI_ISL_2662799, EPI_ISL_2662800, EPI_ISL_2662801, EPI_ISL_2662802, EPI_ISL_2662803, EPI_ISL_2662804, EPI_ISL_2662805, EPI_ISL_2662806, EPI_ISL_2662807, EPI_ISL_2662808, EPI_ISL_2662809, EPI_ISL_2662810, EPI_ISL_2662811, EPI_ISL_2662812, EPI_ISL_2662813, EPI_ISL_2662814, EPI_ISL_2662815, EPI_ISL_2662816, EPI_ISL_2662817, EPI_ISL_2662818, EPI_ISL_2662819, EPI_ISL_2662820, EPI_ISL_2662821, EPI_ISL_2662822, EPI_ISL_2662823, EPI_ISL_2662824, EPI_ISL_2662825, EPI_ISL_2662826, EPI_ISL_2662827, EPI_ISL_2662828, EPI_ISL_2662829, EPI_ISL_2662830, EPI_ISL_2662831, EPI_ISL_2662832, EPI_ISL_2662833, EPI_ISL_2662834, EPI_ISL_2662835, EPI_ISL_2662836, EPI_ISL_2662837, EPI_ISL_2662838, EPI_ISL_2662839, EPI_ISL_2662840, EPI_ISL_2662841, EPI_ISL_2662842, EPI_ISL_2662843, EPI_ISL_2662844, EPI_ISL_2662845, EPI_ISL_2662846, EPI_ISL_2662847, EPI_ISL_2662848, EPI_ISL_2662849, EPI_ISL_2662850, EPI_ISL_2662851, EPI_ISL_2662852, EPI_ISL_2662853, EPI_ISL_2662854, EPI_ISL_2662855, EPI_ISL_2662856, EPI_ISL_2662857, EPI_ISL_2662858, EPI_ISL_2662859, EPI_ISL_2662860, EPI_ISL_2662861, EPI_ISL_2662862, EPI_ISL_2662863, EPI_ISL_2662864, EPI_ISL_2662865, EPI_ISL_2662866, EPI_ISL_2662867, EPI_ISL_2662868, EPI_ISL_2662869, EPI_ISL_2662870, EPI_ISL_2662871, EPI_ISL_2662872, EPI_ISL_2662873, EPI_ISL_2662874, EPI_ISL_2662875, EPI_ISL_2662876, EPI_ISL_2662877, EPI_ISL_2662878, EPI_ISL_2662879, EPI_ISL_2662880, EPI_ISL_2662881, EPI_ISL_2662882, EPI_ISL_2662883, EPI_ISL_2662884, EPI_ISL_2662885, EPI_ISL_2662886, EPI_ISL_2662887, EPI_ISL_2662888, EPI_ISL_2662889, EPI_ISL_2662890, EPI_ISL_2662891, EPI_ISL_2662892, EPI_ISL_2662893, EPI_ISL_2662894, EPI_ISL_2662895, EPI_ISL_2662896, EPI_ISL_2662897, EPI_ISL_2662898, EPI_ISL_2662899, EPI_ISL_2662900, EPI_ISL_2662901, EPI_ISL_2662902, EPI_ISL_2662903, EPI_ISL_2662904, EPI_ISL_2662905, EPI_ISL_2662906, EPI_ISL_2662907, EPI_ISL_2662908, EPI_ISL_2662909, EPI_ISL_2662910, EPI_ISL_2662911, EPI_ISL_2662912, EPI_ISL_2662913, EPI_ISL_2662914, EPI_ISL_2662915, EPI_ISL_2662916, EPI_ISL_2662917, EPI_ISL_2662918, EPI_ISL_2662919, EPI_ISL_2662920, EPI_ISL_2662921, EPI_ISL_2662922, EPI_ISL_2662923, EPI_ISL_2662924, EPI_ISL_2662925, EPI_ISL_2662926, EPI_ISL_2662927, EPI_ISL_2662928, EPI_ISL_2662929, EPI_ISL_2662930, EPI_ISL_2662931, EPI_ISL_2662932, EPI_ISL_2662933, EPI_ISL_2662934, EPI_ISL_2662935, EPI_ISL_2662936, EPI_ISL_2662937, EPI_ISL_2662938, EPI_ISL_2662939, EPI_ISL_2662940, EPI_ISL_2662941, EPI_ISL_2662942, EPI_ISL_2662943, EPI_ISL_2662944, EPI_ISL_2662945, EPI_ISL_2662946, EPI_ISL_2662947, EPI_ISL_2662948, EPI_ISL_2662949, EPI_ISL_2662950, EPI_ISL_2662951, EPI_ISL_2662952, EPI_ISL_2662953, EPI_ISL_2662954, EPI_ISL_2662955, EPI_ISL_2662956, EPI_ISL_2662957, EPI_ISL_2662958, EPI_ISL_2662959, EPI_ISL_2662960, EPI_ISL_2662961, EPI_ISL_2662962, EPI_ISL_2662963, EPI_ISL_2662964, EPI_ISL_2662965, EPI_ISL_2662966, EPI_ISL_2662967, EPI_ISL_2662968, EPI_ISL_2662969, EPI_ISL_2662970, EPI_ISL_2662971, EPI_ISL_2662972, EPI_ISL_2662973, EPI_ISL_2662974, EPI_ISL_2662975, EPI_ISL_2662976, EPI_ISL_2662977, EPI_ISL_2662978, EPI_ISL_2662979, EPI_ISL_2662980, EPI_ISL_2662981, EPI_ISL_2662982, EPI_ISL_2662983, EPI_ISL_2662984, EPI_ISL_2662985, EPI_ISL_2662986, EPI_ISL_2662987, EPI_ISL_2662988, EPI_ISL_2662989, EPI_ISL_2662990, EPI_ISL_2662991, EPI_ISL_2662992, EPI_ISL_2662993, EPI_ISL_2662994, EPI_ISL_2662995, EPI_ISL_2662996, EPI_ISL_2662997, EPI_ISL_2662998, EPI_ISL_2662999, EPI_ISL_2663000, EPI_ISL_2663001, EPI_ISL_2663002, EPI_ISL_2663003, EPI_ISL_2663004, EPI_ISL_2663005, EPI_ISL_26630 |                                                                                                          |                                                                                                                     |                                                                                                                                                                                                                                                                                                                                                                                                                                                                                                                                                                                                                                                                                                                                                                                                                                                                         |                                                                                                                                                                                                                              |

|                                                                                                                                                                                                                                                                                                                                                                                                                                                                                                                                                                                                                                                                                                                                                                                                                                                                                                                                                                                                                                                                                                                                                                                                                                                                                                                                                                                                                                                                                                                                                                                                                                                                                                                                                                                                                                                                                                                                                                                                                                                                                                                                                                                                                                                                                                                                                                                                                                                                                                                                                                                                                                                                                                                                                                                                                                                                                                                                                                                                                                                                                                                                                                                                                                                                                                                                                                                                                                                                                                                                                                                                                                                                                                                                                                                                                                                                                                                                                                                                                                                                                                                                                                                                                                                                                                                                                                                                                                                                                                                                                                                                                                                                                                                                                                                                                                                                                                                                                                                                                                                                                                                                                                                                                                                                                                                                                                                                                                                                                                                                                                                                                                                                                                                                                                                                                                                                                                                                                                                                                                                                                                                                                                                                                                                                                                                                                                                                                                                                                                                                                                                                                                                                                                                                                                                                                                                                                                                                                                                                                                                                                                                                                                                                                                                                                                                                                                                                                                                                                                                                                                                                                                                                                                                                                                                                                                                                                                                                                                                                                                                                                                                                                                                                                                                                                                                                                                                                                                                                                                                                                                                                                                                                                                                                                                                                                                                                                                                                                                                                                                                                                                                                                                                                                                                                                                                                                                                                                                                                                                                                                                                                                                                                                                                                                                                                                                                                                                                                                                                                                                                                                                                                                                                                                                                                                                                                                                                                                                                                                                                                                                                                                                                                                                                                                                                                                                                                                                                                                                                                                                                                                                                                                                                                                                                                                                                                                                                                                                                                                                                                                                                                                                                                                                                                                                                                                                                                                                                                                                                                                                                                                                                                                                                                                                                                                                                                                                                                                                                                                                                                                                                                                                                                                                                                                 |                                                                                                |                                                                                                                                |  |                                                                                                                                                                                                                                                                                                                                                                                                                                                                |                                                                                                                                                         |
|-------------------------------------------------------------------------------------------------------------------------------------------------------------------------------------------------------------------------------------------------------------------------------------------------------------------------------------------------------------------------------------------------------------------------------------------------------------------------------------------------------------------------------------------------------------------------------------------------------------------------------------------------------------------------------------------------------------------------------------------------------------------------------------------------------------------------------------------------------------------------------------------------------------------------------------------------------------------------------------------------------------------------------------------------------------------------------------------------------------------------------------------------------------------------------------------------------------------------------------------------------------------------------------------------------------------------------------------------------------------------------------------------------------------------------------------------------------------------------------------------------------------------------------------------------------------------------------------------------------------------------------------------------------------------------------------------------------------------------------------------------------------------------------------------------------------------------------------------------------------------------------------------------------------------------------------------------------------------------------------------------------------------------------------------------------------------------------------------------------------------------------------------------------------------------------------------------------------------------------------------------------------------------------------------------------------------------------------------------------------------------------------------------------------------------------------------------------------------------------------------------------------------------------------------------------------------------------------------------------------------------------------------------------------------------------------------------------------------------------------------------------------------------------------------------------------------------------------------------------------------------------------------------------------------------------------------------------------------------------------------------------------------------------------------------------------------------------------------------------------------------------------------------------------------------------------------------------------------------------------------------------------------------------------------------------------------------------------------------------------------------------------------------------------------------------------------------------------------------------------------------------------------------------------------------------------------------------------------------------------------------------------------------------------------------------------------------------------------------------------------------------------------------------------------------------------------------------------------------------------------------------------------------------------------------------------------------------------------------------------------------------------------------------------------------------------------------------------------------------------------------------------------------------------------------------------------------------------------------------------------------------------------------------------------------------------------------------------------------------------------------------------------------------------------------------------------------------------------------------------------------------------------------------------------------------------------------------------------------------------------------------------------------------------------------------------------------------------------------------------------------------------------------------------------------------------------------------------------------------------------------------------------------------------------------------------------------------------------------------------------------------------------------------------------------------------------------------------------------------------------------------------------------------------------------------------------------------------------------------------------------------------------------------------------------------------------------------------------------------------------------------------------------------------------------------------------------------------------------------------------------------------------------------------------------------------------------------------------------------------------------------------------------------------------------------------------------------------------------------------------------------------------------------------------------------------------------------------------------------------------------------------------------------------------------------------------------------------------------------------------------------------------------------------------------------------------------------------------------------------------------------------------------------------------------------------------------------------------------------------------------------------------------------------------------------------------------------------------------------------------------------------------------------------------------------------------------------------------------------------------------------------------------------------------------------------------------------------------------------------------------------------------------------------------------------------------------------------------------------------------------------------------------------------------------------------------------------------------------------------------------------------------------------------------------------------------------------------------------------------------------------------------------------------------------------------------------------------------------------------------------------------------------------------------------------------------------------------------------------------------------------------------------------------------------------------------------------------------------------------------------------------------------------------------------------------------------------------------------------------------------------------------------------------------------------------------------------------------------------------------------------------------------------------------------------------------------------------------------------------------------------------------------------------------------------------------------------------------------------------------------------------------------------------------------------------------------------------------------------------------------------------------------------------------------------------------------------------------------------------------------------------------------------------------------------------------------------------------------------------------------------------------------------------------------------------------------------------------------------------------------------------------------------------------------------------------------------------------------------------------------------------------------------------------------------------------------------------------------------------------------------------------------------------------------------------------------------------------------------------------------------------------------------------------------------------------------------------------------------------------------------------------------------------------------------------------------------------------------------------------------------------------------------------------------------------------------------------------------------------------------------------------------------------------------------------------------------------------------------------------------------------------------------------------------------------------------------------------------------------------------------------------------------------------------------------------------------------------------------------------------------------------------------------------------------------------------------------------------------------------------------------------------------------------------------------------------------------------------------------------------------------------------------------------------------------------------------------------------------------------------------------------------------------------------------------------------------------------------------------------------------------------------------------------------------------------------------------------------------------------------------------------------------------------------------------------------------------------------------------------------------------------------------------------------------------------------------------------------------------------------------------------------------------------------------------------------------------------------------------------------------------------------------------------------------------------------------------------------------------------------------------------------------------------------------------------------------------------------------------------------------------------------------------------------------------------------------------------------------------------------------------------------------------------------------------------------------------------------------------------------------------------------------------------------------------------------------------------------------------------------------------------------------------------------------------------------------------------------------------------------------------------------------------------------------------------------------------------------------------------------------------------------------------------------------------------------------------------------------------------------------------------------------------------------------------------------------------------------------------------------------------------------------------------------------------------------------------------------------------------------------------------------------------------------------------------------------------------------------------------------------------------------------------------------------------------------------------------------------------------------------------------------------------------------------------------------------------------------------------------------------------------------------------------------------------------------------------------------------------------------------------------------------------------------------------------------------------------------------------------------------------------------------------------------------------------------------------------------------------------------------------------------------------------------------------------------------------------------------------------------------------------------------------------------------------------------------------------------------------------|------------------------------------------------------------------------------------------------|--------------------------------------------------------------------------------------------------------------------------------|--|----------------------------------------------------------------------------------------------------------------------------------------------------------------------------------------------------------------------------------------------------------------------------------------------------------------------------------------------------------------------------------------------------------------------------------------------------------------|---------------------------------------------------------------------------------------------------------------------------------------------------------|
| EPI_ISL_1094192, EPI_ISL_1312230, EPI_ISL_1322650, EPI_ISL_1382686, EPI_ISL_2403956, EPI_ISL_2403997, EPI_ISL_2404564, EPI_ISL_2404565, EPI_ISL_2404566, EPI_ISL_2404567, EPI_ISL_2404568, EPI_ISL_2404569, EPI_ISL_2404570, EPI_ISL_2425245, EPI_ISL_2832699                                                                                                                                                                                                                                                                                                                                                                                                                                                                                                                                                                                                                                                                                                                                                                                                                                                                                                                                                                                                                                                                                                                                                                                                                                                                                                                                                                                                                                                                                                                                                                                                                                                                                                                                                                                                                                                                                                                                                                                                                                                                                                                                                                                                                                                                                                                                                                                                                                                                                                                                                                                                                                                                                                                                                                                                                                                                                                                                                                                                                                                                                                                                                                                                                                                                                                                                                                                                                                                                                                                                                                                                                                                                                                                                                                                                                                                                                                                                                                                                                                                                                                                                                                                                                                                                                                                                                                                                                                                                                                                                                                                                                                                                                                                                                                                                                                                                                                                                                                                                                                                                                                                                                                                                                                                                                                                                                                                                                                                                                                                                                                                                                                                                                                                                                                                                                                                                                                                                                                                                                                                                                                                                                                                                                                                                                                                                                                                                                                                                                                                                                                                                                                                                                                                                                                                                                                                                                                                                                                                                                                                                                                                                                                                                                                                                                                                                                                                                                                                                                                                                                                                                                                                                                                                                                                                                                                                                                                                                                                                                                                                                                                                                                                                                                                                                                                                                                                                                                                                                                                                                                                                                                                                                                                                                                                                                                                                                                                                                                                                                                                                                                                                                                                                                                                                                                                                                                                                                                                                                                                                                                                                                                                                                                                                                                                                                                                                                                                                                                                                                                                                                                                                                                                                                                                                                                                                                                                                                                                                                                                                                                                                                                                                                                                                                                                                                                                                                                                                                                                                                                                                                                                                                                                                                                                                                                                                                                                                                                                                                                                                                                                                                                                                                                                                                                                                                                                                                                                                                                                                                                                                                                                                                                                                                                                                                                                                                                                                                                                                                                   |                                                                                                |                                                                                                                                |  |                                                                                                                                                                                                                                                                                                                                                                                                                                                                | Bert Vanmechelen; Jan Marti-Carreras; Piet Maes; Tony Wawina-Bokalanga                                                                                  |
| see above                                                                                                                                                                                                                                                                                                                                                                                                                                                                                                                                                                                                                                                                                                                                                                                                                                                                                                                                                                                                                                                                                                                                                                                                                                                                                                                                                                                                                                                                                                                                                                                                                                                                                                                                                                                                                                                                                                                                                                                                                                                                                                                                                                                                                                                                                                                                                                                                                                                                                                                                                                                                                                                                                                                                                                                                                                                                                                                                                                                                                                                                                                                                                                                                                                                                                                                                                                                                                                                                                                                                                                                                                                                                                                                                                                                                                                                                                                                                                                                                                                                                                                                                                                                                                                                                                                                                                                                                                                                                                                                                                                                                                                                                                                                                                                                                                                                                                                                                                                                                                                                                                                                                                                                                                                                                                                                                                                                                                                                                                                                                                                                                                                                                                                                                                                                                                                                                                                                                                                                                                                                                                                                                                                                                                                                                                                                                                                                                                                                                                                                                                                                                                                                                                                                                                                                                                                                                                                                                                                                                                                                                                                                                                                                                                                                                                                                                                                                                                                                                                                                                                                                                                                                                                                                                                                                                                                                                                                                                                                                                                                                                                                                                                                                                                                                                                                                                                                                                                                                                                                                                                                                                                                                                                                                                                                                                                                                                                                                                                                                                                                                                                                                                                                                                                                                                                                                                                                                                                                                                                                                                                                                                                                                                                                                                                                                                                                                                                                                                                                                                                                                                                                                                                                                                                                                                                                                                                                                                                                                                                                                                                                                                                                                                                                                                                                                                                                                                                                                                                                                                                                                                                                                                                                                                                                                                                                                                                                                                                                                                                                                                                                                                                                                                                                                                                                                                                                                                                                                                                                                                                                                                                                                                                                                                                                                                                                                                                                                                                                                                                                                                                                                                                                                                                                                                       | KU Leuven, Rega Institute, Clinical and Epidemiological Virology                               | KU Leuven, Rega Institute, Clinical and Epidemiological Virology                                                               |  |                                                                                                                                                                                                                                                                                                                                                                                                                                                                |                                                                                                                                                         |
| EPI_ISL_1039041                                                                                                                                                                                                                                                                                                                                                                                                                                                                                                                                                                                                                                                                                                                                                                                                                                                                                                                                                                                                                                                                                                                                                                                                                                                                                                                                                                                                                                                                                                                                                                                                                                                                                                                                                                                                                                                                                                                                                                                                                                                                                                                                                                                                                                                                                                                                                                                                                                                                                                                                                                                                                                                                                                                                                                                                                                                                                                                                                                                                                                                                                                                                                                                                                                                                                                                                                                                                                                                                                                                                                                                                                                                                                                                                                                                                                                                                                                                                                                                                                                                                                                                                                                                                                                                                                                                                                                                                                                                                                                                                                                                                                                                                                                                                                                                                                                                                                                                                                                                                                                                                                                                                                                                                                                                                                                                                                                                                                                                                                                                                                                                                                                                                                                                                                                                                                                                                                                                                                                                                                                                                                                                                                                                                                                                                                                                                                                                                                                                                                                                                                                                                                                                                                                                                                                                                                                                                                                                                                                                                                                                                                                                                                                                                                                                                                                                                                                                                                                                                                                                                                                                                                                                                                                                                                                                                                                                                                                                                                                                                                                                                                                                                                                                                                                                                                                                                                                                                                                                                                                                                                                                                                                                                                                                                                                                                                                                                                                                                                                                                                                                                                                                                                                                                                                                                                                                                                                                                                                                                                                                                                                                                                                                                                                                                                                                                                                                                                                                                                                                                                                                                                                                                                                                                                                                                                                                                                                                                                                                                                                                                                                                                                                                                                                                                                                                                                                                                                                                                                                                                                                                                                                                                                                                                                                                                                                                                                                                                                                                                                                                                                                                                                                                                                                                                                                                                                                                                                                                                                                                                                                                                                                                                                                                                                                                                                                                                                                                                                                                                                                                                                                                                                                                                                                                                 | Kamchatka Regional Children's Infectious Diseases Hospital                                     | WHO National Influenza Centre Russian Federation                                                                               |  | Andrey Komissarov; Anna Ivanova; Artem Fadeev; Daria Danilenko; Dmitry Bazhenov; Dmitry Lioznov; Elena Nabieva; Georgii Bazykin; Kseniya Safina; Kseniya Komissarova; Maria Pisareva; Maria Timofeeva; Tamila Musaeva; Veronika Eder                                                                                                                                                                                                                           |                                                                                                                                                         |
| EPI_ISL_1313387                                                                                                                                                                                                                                                                                                                                                                                                                                                                                                                                                                                                                                                                                                                                                                                                                                                                                                                                                                                                                                                                                                                                                                                                                                                                                                                                                                                                                                                                                                                                                                                                                                                                                                                                                                                                                                                                                                                                                                                                                                                                                                                                                                                                                                                                                                                                                                                                                                                                                                                                                                                                                                                                                                                                                                                                                                                                                                                                                                                                                                                                                                                                                                                                                                                                                                                                                                                                                                                                                                                                                                                                                                                                                                                                                                                                                                                                                                                                                                                                                                                                                                                                                                                                                                                                                                                                                                                                                                                                                                                                                                                                                                                                                                                                                                                                                                                                                                                                                                                                                                                                                                                                                                                                                                                                                                                                                                                                                                                                                                                                                                                                                                                                                                                                                                                                                                                                                                                                                                                                                                                                                                                                                                                                                                                                                                                                                                                                                                                                                                                                                                                                                                                                                                                                                                                                                                                                                                                                                                                                                                                                                                                                                                                                                                                                                                                                                                                                                                                                                                                                                                                                                                                                                                                                                                                                                                                                                                                                                                                                                                                                                                                                                                                                                                                                                                                                                                                                                                                                                                                                                                                                                                                                                                                                                                                                                                                                                                                                                                                                                                                                                                                                                                                                                                                                                                                                                                                                                                                                                                                                                                                                                                                                                                                                                                                                                                                                                                                                                                                                                                                                                                                                                                                                                                                                                                                                                                                                                                                                                                                                                                                                                                                                                                                                                                                                                                                                                                                                                                                                                                                                                                                                                                                                                                                                                                                                                                                                                                                                                                                                                                                                                                                                                                                                                                                                                                                                                                                                                                                                                                                                                                                                                                                                                                                                                                                                                                                                                                                                                                                                                                                                                                                                                                                                 | Karolinska University Hospital                                                                 | Karolinska University Hospital                                                                                                 |  | Annelie Bjerkner; Isak Sylvin; Jan Albert; Karolina Ininbergs; Lina Guerra Blomqvist; Lynda Eneh; Martin Ekman; Martina Wahlund; Robert Dyrdak; Sandra Broddesson; Tanja Normark; Tobias Allander; Valterri Wirta; Zhibing Yun                                                                                                                                                                                                                                 |                                                                                                                                                         |
| EPI_ISL_2648231, EPI_ISL_2648232, EPI_ISL_2648235, EPI_ISL_2648239, EPI_ISL_2648240                                                                                                                                                                                                                                                                                                                                                                                                                                                                                                                                                                                                                                                                                                                                                                                                                                                                                                                                                                                                                                                                                                                                                                                                                                                                                                                                                                                                                                                                                                                                                                                                                                                                                                                                                                                                                                                                                                                                                                                                                                                                                                                                                                                                                                                                                                                                                                                                                                                                                                                                                                                                                                                                                                                                                                                                                                                                                                                                                                                                                                                                                                                                                                                                                                                                                                                                                                                                                                                                                                                                                                                                                                                                                                                                                                                                                                                                                                                                                                                                                                                                                                                                                                                                                                                                                                                                                                                                                                                                                                                                                                                                                                                                                                                                                                                                                                                                                                                                                                                                                                                                                                                                                                                                                                                                                                                                                                                                                                                                                                                                                                                                                                                                                                                                                                                                                                                                                                                                                                                                                                                                                                                                                                                                                                                                                                                                                                                                                                                                                                                                                                                                                                                                                                                                                                                                                                                                                                                                                                                                                                                                                                                                                                                                                                                                                                                                                                                                                                                                                                                                                                                                                                                                                                                                                                                                                                                                                                                                                                                                                                                                                                                                                                                                                                                                                                                                                                                                                                                                                                                                                                                                                                                                                                                                                                                                                                                                                                                                                                                                                                                                                                                                                                                                                                                                                                                                                                                                                                                                                                                                                                                                                                                                                                                                                                                                                                                                                                                                                                                                                                                                                                                                                                                                                                                                                                                                                                                                                                                                                                                                                                                                                                                                                                                                                                                                                                                                                                                                                                                                                                                                                                                                                                                                                                                                                                                                                                                                                                                                                                                                                                                                                                                                                                                                                                                                                                                                                                                                                                                                                                                                                                                                                                                                                                                                                                                                                                                                                                                                                                                                                                                                                                                             | Kasane Primary Hospital Laboratory                                                             | Botswana Harvard HIV Reference Laboratory                                                                                      |  | Agnes Karutwaeng; Boitumelo Zuze; Botshelo Radibe; Dorcas Maruapula; Joseph Makheha; Keoratile Ntshambiwa; Legodile Kooepile; Madisa Mine; Mosepole Mosepole; Ontlametse T. Bareng; Roger Shapiro; Rose Munyere; Shahin Lockman; Sikhulile Moyo; Simani Gasetiwe; Thongbotho Mphoyakgosi; Wonderful T. Choga                                                                                                                                                   |                                                                                                                                                         |
| EPI_ISL_512811                                                                                                                                                                                                                                                                                                                                                                                                                                                                                                                                                                                                                                                                                                                                                                                                                                                                                                                                                                                                                                                                                                                                                                                                                                                                                                                                                                                                                                                                                                                                                                                                                                                                                                                                                                                                                                                                                                                                                                                                                                                                                                                                                                                                                                                                                                                                                                                                                                                                                                                                                                                                                                                                                                                                                                                                                                                                                                                                                                                                                                                                                                                                                                                                                                                                                                                                                                                                                                                                                                                                                                                                                                                                                                                                                                                                                                                                                                                                                                                                                                                                                                                                                                                                                                                                                                                                                                                                                                                                                                                                                                                                                                                                                                                                                                                                                                                                                                                                                                                                                                                                                                                                                                                                                                                                                                                                                                                                                                                                                                                                                                                                                                                                                                                                                                                                                                                                                                                                                                                                                                                                                                                                                                                                                                                                                                                                                                                                                                                                                                                                                                                                                                                                                                                                                                                                                                                                                                                                                                                                                                                                                                                                                                                                                                                                                                                                                                                                                                                                                                                                                                                                                                                                                                                                                                                                                                                                                                                                                                                                                                                                                                                                                                                                                                                                                                                                                                                                                                                                                                                                                                                                                                                                                                                                                                                                                                                                                                                                                                                                                                                                                                                                                                                                                                                                                                                                                                                                                                                                                                                                                                                                                                                                                                                                                                                                                                                                                                                                                                                                                                                                                                                                                                                                                                                                                                                                                                                                                                                                                                                                                                                                                                                                                                                                                                                                                                                                                                                                                                                                                                                                                                                                                                                                                                                                                                                                                                                                                                                                                                                                                                                                                                                                                                                                                                                                                                                                                                                                                                                                                                                                                                                                                                                                                                                                                                                                                                                                                                                                                                                                                                                                                                                                                                                                  | Kenema Government Hospital, Ministry of Health and Sanitation                                  | Kenema Government Hospital, Ministry of Health and Sanitation                                                                  |  | Andersen, K.; Garry, R.; Goba, A.; Grant, D.; Hapi, C.; Jalloh, S.; Mehta, S.; Momoh, M.; Olawoye, I.; Oluniyi, P.; Park, D.; Sandi, J.; Siddle, K.; Tomkins-Tinch, C.                                                                                                                                                                                                                                                                                         |                                                                                                                                                         |
| EPI_ISL_1239251, EPI_ISL_1239488                                                                                                                                                                                                                                                                                                                                                                                                                                                                                                                                                                                                                                                                                                                                                                                                                                                                                                                                                                                                                                                                                                                                                                                                                                                                                                                                                                                                                                                                                                                                                                                                                                                                                                                                                                                                                                                                                                                                                                                                                                                                                                                                                                                                                                                                                                                                                                                                                                                                                                                                                                                                                                                                                                                                                                                                                                                                                                                                                                                                                                                                                                                                                                                                                                                                                                                                                                                                                                                                                                                                                                                                                                                                                                                                                                                                                                                                                                                                                                                                                                                                                                                                                                                                                                                                                                                                                                                                                                                                                                                                                                                                                                                                                                                                                                                                                                                                                                                                                                                                                                                                                                                                                                                                                                                                                                                                                                                                                                                                                                                                                                                                                                                                                                                                                                                                                                                                                                                                                                                                                                                                                                                                                                                                                                                                                                                                                                                                                                                                                                                                                                                                                                                                                                                                                                                                                                                                                                                                                                                                                                                                                                                                                                                                                                                                                                                                                                                                                                                                                                                                                                                                                                                                                                                                                                                                                                                                                                                                                                                                                                                                                                                                                                                                                                                                                                                                                                                                                                                                                                                                                                                                                                                                                                                                                                                                                                                                                                                                                                                                                                                                                                                                                                                                                                                                                                                                                                                                                                                                                                                                                                                                                                                                                                                                                                                                                                                                                                                                                                                                                                                                                                                                                                                                                                                                                                                                                                                                                                                                                                                                                                                                                                                                                                                                                                                                                                                                                                                                                                                                                                                                                                                                                                                                                                                                                                                                                                                                                                                                                                                                                                                                                                                                                                                                                                                                                                                                                                                                                                                                                                                                                                                                                                                                                                                                                                                                                                                                                                                                                                                                                                                                                                                                                                                | Kimberley Hospital, National Health Laboratory Services, Northern Cape, South Africa           | National Institute for Communicable Diseases of the National Health Laboratory Service                                         |  |                                                                                                                                                                                                                                                                                                                                                                                                                                                                | Amoako DG; Bhiman JN; Ismail A; Mahlangu B; Mohale T; Ntuli N; Scheepers C                                                                              |
| EPI_ISL_489996                                                                                                                                                                                                                                                                                                                                                                                                                                                                                                                                                                                                                                                                                                                                                                                                                                                                                                                                                                                                                                                                                                                                                                                                                                                                                                                                                                                                                                                                                                                                                                                                                                                                                                                                                                                                                                                                                                                                                                                                                                                                                                                                                                                                                                                                                                                                                                                                                                                                                                                                                                                                                                                                                                                                                                                                                                                                                                                                                                                                                                                                                                                                                                                                                                                                                                                                                                                                                                                                                                                                                                                                                                                                                                                                                                                                                                                                                                                                                                                                                                                                                                                                                                                                                                                                                                                                                                                                                                                                                                                                                                                                                                                                                                                                                                                                                                                                                                                                                                                                                                                                                                                                                                                                                                                                                                                                                                                                                                                                                                                                                                                                                                                                                                                                                                                                                                                                                                                                                                                                                                                                                                                                                                                                                                                                                                                                                                                                                                                                                                                                                                                                                                                                                                                                                                                                                                                                                                                                                                                                                                                                                                                                                                                                                                                                                                                                                                                                                                                                                                                                                                                                                                                                                                                                                                                                                                                                                                                                                                                                                                                                                                                                                                                                                                                                                                                                                                                                                                                                                                                                                                                                                                                                                                                                                                                                                                                                                                                                                                                                                                                                                                                                                                                                                                                                                                                                                                                                                                                                                                                                                                                                                                                                                                                                                                                                                                                                                                                                                                                                                                                                                                                                                                                                                                                                                                                                                                                                                                                                                                                                                                                                                                                                                                                                                                                                                                                                                                                                                                                                                                                                                                                                                                                                                                                                                                                                                                                                                                                                                                                                                                                                                                                                                                                                                                                                                                                                                                                                                                                                                                                                                                                                                                                                                                                                                                                                                                                                                                                                                                                                                                                                                                                                                                                                  | King Fahad Medical City                                                                        | King Fahad Medical City                                                                                                        |  |                                                                                                                                                                                                                                                                                                                                                                                                                                                                | Alghorabi, M.; Alosaimi, B.; Enani, M.; Naeeem, A.                                                                                                      |
| EPI_ISL_3236930, EPI_ISL_3237049                                                                                                                                                                                                                                                                                                                                                                                                                                                                                                                                                                                                                                                                                                                                                                                                                                                                                                                                                                                                                                                                                                                                                                                                                                                                                                                                                                                                                                                                                                                                                                                                                                                                                                                                                                                                                                                                                                                                                                                                                                                                                                                                                                                                                                                                                                                                                                                                                                                                                                                                                                                                                                                                                                                                                                                                                                                                                                                                                                                                                                                                                                                                                                                                                                                                                                                                                                                                                                                                                                                                                                                                                                                                                                                                                                                                                                                                                                                                                                                                                                                                                                                                                                                                                                                                                                                                                                                                                                                                                                                                                                                                                                                                                                                                                                                                                                                                                                                                                                                                                                                                                                                                                                                                                                                                                                                                                                                                                                                                                                                                                                                                                                                                                                                                                                                                                                                                                                                                                                                                                                                                                                                                                                                                                                                                                                                                                                                                                                                                                                                                                                                                                                                                                                                                                                                                                                                                                                                                                                                                                                                                                                                                                                                                                                                                                                                                                                                                                                                                                                                                                                                                                                                                                                                                                                                                                                                                                                                                                                                                                                                                                                                                                                                                                                                                                                                                                                                                                                                                                                                                                                                                                                                                                                                                                                                                                                                                                                                                                                                                                                                                                                                                                                                                                                                                                                                                                                                                                                                                                                                                                                                                                                                                                                                                                                                                                                                                                                                                                                                                                                                                                                                                                                                                                                                                                                                                                                                                                                                                                                                                                                                                                                                                                                                                                                                                                                                                                                                                                                                                                                                                                                                                                                                                                                                                                                                                                                                                                                                                                                                                                                                                                                                                                                                                                                                                                                                                                                                                                                                                                                                                                                                                                                                                                                                                                                                                                                                                                                                                                                                                                                                                                                                                                                                | King Faisal Specialist Hospital & Research Centre                                              | King Faisal Specialist Hospital & Research Centre                                                                              |  |                                                                                                                                                                                                                                                                                                                                                                                                                                                                | Abeer N Alshukairi; Ashraf Dada; Mohamad K Al Hroub; Rayan Bawayan; Waseem A Al Mousa                                                                   |
| EPI_ISL_3031398                                                                                                                                                                                                                                                                                                                                                                                                                                                                                                                                                                                                                                                                                                                                                                                                                                                                                                                                                                                                                                                                                                                                                                                                                                                                                                                                                                                                                                                                                                                                                                                                                                                                                                                                                                                                                                                                                                                                                                                                                                                                                                                                                                                                                                                                                                                                                                                                                                                                                                                                                                                                                                                                                                                                                                                                                                                                                                                                                                                                                                                                                                                                                                                                                                                                                                                                                                                                                                                                                                                                                                                                                                                                                                                                                                                                                                                                                                                                                                                                                                                                                                                                                                                                                                                                                                                                                                                                                                                                                                                                                                                                                                                                                                                                                                                                                                                                                                                                                                                                                                                                                                                                                                                                                                                                                                                                                                                                                                                                                                                                                                                                                                                                                                                                                                                                                                                                                                                                                                                                                                                                                                                                                                                                                                                                                                                                                                                                                                                                                                                                                                                                                                                                                                                                                                                                                                                                                                                                                                                                                                                                                                                                                                                                                                                                                                                                                                                                                                                                                                                                                                                                                                                                                                                                                                                                                                                                                                                                                                                                                                                                                                                                                                                                                                                                                                                                                                                                                                                                                                                                                                                                                                                                                                                                                                                                                                                                                                                                                                                                                                                                                                                                                                                                                                                                                                                                                                                                                                                                                                                                                                                                                                                                                                                                                                                                                                                                                                                                                                                                                                                                                                                                                                                                                                                                                                                                                                                                                                                                                                                                                                                                                                                                                                                                                                                                                                                                                                                                                                                                                                                                                                                                                                                                                                                                                                                                                                                                                                                                                                                                                                                                                                                                                                                                                                                                                                                                                                                                                                                                                                                                                                                                                                                                                                                                                                                                                                                                                                                                                                                                                                                                                                                                                                                                 | King'ong'o Dispensary                                                                          | USAMRD-A, Basic Science Laboratory                                                                                             |  | Alan Lemtudo; Beth Mutai; Brian Andika; Carol Kifude; Clement Masakwe; Eric Muthanje; Esther Omuseni; Faith Sigei; Gathii Kimita; George Awinda; John Waitumbi; Josphat Nyataya; Rachel Githii; Rehema Liyai; Stephen Ochola                                                                                                                                                                                                                                   |                                                                                                                                                         |
| EPI_ISL_2860281                                                                                                                                                                                                                                                                                                                                                                                                                                                                                                                                                                                                                                                                                                                                                                                                                                                                                                                                                                                                                                                                                                                                                                                                                                                                                                                                                                                                                                                                                                                                                                                                                                                                                                                                                                                                                                                                                                                                                                                                                                                                                                                                                                                                                                                                                                                                                                                                                                                                                                                                                                                                                                                                                                                                                                                                                                                                                                                                                                                                                                                                                                                                                                                                                                                                                                                                                                                                                                                                                                                                                                                                                                                                                                                                                                                                                                                                                                                                                                                                                                                                                                                                                                                                                                                                                                                                                                                                                                                                                                                                                                                                                                                                                                                                                                                                                                                                                                                                                                                                                                                                                                                                                                                                                                                                                                                                                                                                                                                                                                                                                                                                                                                                                                                                                                                                                                                                                                                                                                                                                                                                                                                                                                                                                                                                                                                                                                                                                                                                                                                                                                                                                                                                                                                                                                                                                                                                                                                                                                                                                                                                                                                                                                                                                                                                                                                                                                                                                                                                                                                                                                                                                                                                                                                                                                                                                                                                                                                                                                                                                                                                                                                                                                                                                                                                                                                                                                                                                                                                                                                                                                                                                                                                                                                                                                                                                                                                                                                                                                                                                                                                                                                                                                                                                                                                                                                                                                                                                                                                                                                                                                                                                                                                                                                                                                                                                                                                                                                                                                                                                                                                                                                                                                                                                                                                                                                                                                                                                                                                                                                                                                                                                                                                                                                                                                                                                                                                                                                                                                                                                                                                                                                                                                                                                                                                                                                                                                                                                                                                                                                                                                                                                                                                                                                                                                                                                                                                                                                                                                                                                                                                                                                                                                                                                                                                                                                                                                                                                                                                                                                                                                                                                                                                                                                                 | Klinik Primera Clinica                                                                         | Biosafety Level-3 Laboratory, Indonesian Institute of Sciences (LIPI)                                                          |  |                                                                                                                                                                                                                                                                                                                                                                                                                                                                | Andri Wardana; Anik B. Dharmayanti; Idris; Indriawati; Listian Oktavia; Masrukhin; Rathi A. Ningrum; Yuliawati                                          |
| EPI_ISL_2693464                                                                                                                                                                                                                                                                                                                                                                                                                                                                                                                                                                                                                                                                                                                                                                                                                                                                                                                                                                                                                                                                                                                                                                                                                                                                                                                                                                                                                                                                                                                                                                                                                                                                                                                                                                                                                                                                                                                                                                                                                                                                                                                                                                                                                                                                                                                                                                                                                                                                                                                                                                                                                                                                                                                                                                                                                                                                                                                                                                                                                                                                                                                                                                                                                                                                                                                                                                                                                                                                                                                                                                                                                                                                                                                                                                                                                                                                                                                                                                                                                                                                                                                                                                                                                                                                                                                                                                                                                                                                                                                                                                                                                                                                                                                                                                                                                                                                                                                                                                                                                                                                                                                                                                                                                                                                                                                                                                                                                                                                                                                                                                                                                                                                                                                                                                                                                                                                                                                                                                                                                                                                                                                                                                                                                                                                                                                                                                                                                                                                                                                                                                                                                                                                                                                                                                                                                                                                                                                                                                                                                                                                                                                                                                                                                                                                                                                                                                                                                                                                                                                                                                                                                                                                                                                                                                                                                                                                                                                                                                                                                                                                                                                                                                                                                                                                                                                                                                                                                                                                                                                                                                                                                                                                                                                                                                                                                                                                                                                                                                                                                                                                                                                                                                                                                                                                                                                                                                                                                                                                                                                                                                                                                                                                                                                                                                                                                                                                                                                                                                                                                                                                                                                                                                                                                                                                                                                                                                                                                                                                                                                                                                                                                                                                                                                                                                                                                                                                                                                                                                                                                                                                                                                                                                                                                                                                                                                                                                                                                                                                                                                                                                                                                                                                                                                                                                                                                                                                                                                                                                                                                                                                                                                                                                                                                                                                                                                                                                                                                                                                                                                                                                                                                                                                                                                                 | Klinika za infektivne bolesti "Dr. Fran Mihaljević"                                            | Hrvatski zavod za javno zdravstvo                                                                                              |  |                                                                                                                                                                                                                                                                                                                                                                                                                                                                | Irena Tabain; Ivana Ferenčak                                                                                                                            |
| EPI_ISL_1583298                                                                                                                                                                                                                                                                                                                                                                                                                                                                                                                                                                                                                                                                                                                                                                                                                                                                                                                                                                                                                                                                                                                                                                                                                                                                                                                                                                                                                                                                                                                                                                                                                                                                                                                                                                                                                                                                                                                                                                                                                                                                                                                                                                                                                                                                                                                                                                                                                                                                                                                                                                                                                                                                                                                                                                                                                                                                                                                                                                                                                                                                                                                                                                                                                                                                                                                                                                                                                                                                                                                                                                                                                                                                                                                                                                                                                                                                                                                                                                                                                                                                                                                                                                                                                                                                                                                                                                                                                                                                                                                                                                                                                                                                                                                                                                                                                                                                                                                                                                                                                                                                                                                                                                                                                                                                                                                                                                                                                                                                                                                                                                                                                                                                                                                                                                                                                                                                                                                                                                                                                                                                                                                                                                                                                                                                                                                                                                                                                                                                                                                                                                                                                                                                                                                                                                                                                                                                                                                                                                                                                                                                                                                                                                                                                                                                                                                                                                                                                                                                                                                                                                                                                                                                                                                                                                                                                                                                                                                                                                                                                                                                                                                                                                                                                                                                                                                                                                                                                                                                                                                                                                                                                                                                                                                                                                                                                                                                                                                                                                                                                                                                                                                                                                                                                                                                                                                                                                                                                                                                                                                                                                                                                                                                                                                                                                                                                                                                                                                                                                                                                                                                                                                                                                                                                                                                                                                                                                                                                                                                                                                                                                                                                                                                                                                                                                                                                                                                                                                                                                                                                                                                                                                                                                                                                                                                                                                                                                                                                                                                                                                                                                                                                                                                                                                                                                                                                                                                                                                                                                                                                                                                                                                                                                                                                                                                                                                                                                                                                                                                                                                                                                                                                                                                                                                                 | Klinikum Wels-Grieskirchen                                                                     | Bergthaler laboratory, CeMM Research Center for Molecular Medicine of the Austrian Academy of Sciences                         |  | Andreas Bergthaler; Anna Schedi; Bekir Erguner; Benedikt Agerer; Christoph Bock; Fabian Amman; Jan Laine; Lukas Endler; Maelle Le Moing; Martin Senekowitsch; Michael Schuster; Petr Triska; Thomas Penz                                                                                                                                                                                                                                                       |                                                                                                                                                         |
| EPI_ISL_1280682                                                                                                                                                                                                                                                                                                                                                                                                                                                                                                                                                                                                                                                                                                                                                                                                                                                                                                                                                                                                                                                                                                                                                                                                                                                                                                                                                                                                                                                                                                                                                                                                                                                                                                                                                                                                                                                                                                                                                                                                                                                                                                                                                                                                                                                                                                                                                                                                                                                                                                                                                                                                                                                                                                                                                                                                                                                                                                                                                                                                                                                                                                                                                                                                                                                                                                                                                                                                                                                                                                                                                                                                                                                                                                                                                                                                                                                                                                                                                                                                                                                                                                                                                                                                                                                                                                                                                                                                                                                                                                                                                                                                                                                                                                                                                                                                                                                                                                                                                                                                                                                                                                                                                                                                                                                                                                                                                                                                                                                                                                                                                                                                                                                                                                                                                                                                                                                                                                                                                                                                                                                                                                                                                                                                                                                                                                                                                                                                                                                                                                                                                                                                                                                                                                                                                                                                                                                                                                                                                                                                                                                                                                                                                                                                                                                                                                                                                                                                                                                                                                                                                                                                                                                                                                                                                                                                                                                                                                                                                                                                                                                                                                                                                                                                                                                                                                                                                                                                                                                                                                                                                                                                                                                                                                                                                                                                                                                                                                                                                                                                                                                                                                                                                                                                                                                                                                                                                                                                                                                                                                                                                                                                                                                                                                                                                                                                                                                                                                                                                                                                                                                                                                                                                                                                                                                                                                                                                                                                                                                                                                                                                                                                                                                                                                                                                                                                                                                                                                                                                                                                                                                                                                                                                                                                                                                                                                                                                                                                                                                                                                                                                                                                                                                                                                                                                                                                                                                                                                                                                                                                                                                                                                                                                                                                                                                                                                                                                                                                                                                                                                                                                                                                                                                                                                                                 | Klinikum der Stadt Ludwigshafen - Institut für Labordiagnostik Hygiene und Transfusionsmedizin | Robert Koch Institute                                                                                                          |  |                                                                                                                                                                                                                                                                                                                                                                                                                                                                |                                                                                                                                                         |
| EPI_ISL_1300334                                                                                                                                                                                                                                                                                                                                                                                                                                                                                                                                                                                                                                                                                                                                                                                                                                                                                                                                                                                                                                                                                                                                                                                                                                                                                                                                                                                                                                                                                                                                                                                                                                                                                                                                                                                                                                                                                                                                                                                                                                                                                                                                                                                                                                                                                                                                                                                                                                                                                                                                                                                                                                                                                                                                                                                                                                                                                                                                                                                                                                                                                                                                                                                                                                                                                                                                                                                                                                                                                                                                                                                                                                                                                                                                                                                                                                                                                                                                                                                                                                                                                                                                                                                                                                                                                                                                                                                                                                                                                                                                                                                                                                                                                                                                                                                                                                                                                                                                                                                                                                                                                                                                                                                                                                                                                                                                                                                                                                                                                                                                                                                                                                                                                                                                                                                                                                                                                                                                                                                                                                                                                                                                                                                                                                                                                                                                                                                                                                                                                                                                                                                                                                                                                                                                                                                                                                                                                                                                                                                                                                                                                                                                                                                                                                                                                                                                                                                                                                                                                                                                                                                                                                                                                                                                                                                                                                                                                                                                                                                                                                                                                                                                                                                                                                                                                                                                                                                                                                                                                                                                                                                                                                                                                                                                                                                                                                                                                                                                                                                                                                                                                                                                                                                                                                                                                                                                                                                                                                                                                                                                                                                                                                                                                                                                                                                                                                                                                                                                                                                                                                                                                                                                                                                                                                                                                                                                                                                                                                                                                                                                                                                                                                                                                                                                                                                                                                                                                                                                                                                                                                                                                                                                                                                                                                                                                                                                                                                                                                                                                                                                                                                                                                                                                                                                                                                                                                                                                                                                                                                                                                                                                                                                                                                                                                                                                                                                                                                                                                                                                                                                                                                                                                                                                                                                 | Klinisk mikrobiologi                                                                           | The Public Health Agency of Sweden                                                                                             |  | Anna Risberg; Anna-Malin Linde; Carlo Berg; Karin Tegmark-Wisell; Maria Lind Karlberg; Mattias Haukland; Mia Brytting; Noura Walai; Oskar Karlsson Lindsjo; Petra Edquist; Petra Holmstrom; Reza Advani; Samuel Ohman; Sofia Stamouli                                                                                                                                                                                                                          |                                                                                                                                                         |
| EPI_ISL_2649991                                                                                                                                                                                                                                                                                                                                                                                                                                                                                                                                                                                                                                                                                                                                                                                                                                                                                                                                                                                                                                                                                                                                                                                                                                                                                                                                                                                                                                                                                                                                                                                                                                                                                                                                                                                                                                                                                                                                                                                                                                                                                                                                                                                                                                                                                                                                                                                                                                                                                                                                                                                                                                                                                                                                                                                                                                                                                                                                                                                                                                                                                                                                                                                                                                                                                                                                                                                                                                                                                                                                                                                                                                                                                                                                                                                                                                                                                                                                                                                                                                                                                                                                                                                                                                                                                                                                                                                                                                                                                                                                                                                                                                                                                                                                                                                                                                                                                                                                                                                                                                                                                                                                                                                                                                                                                                                                                                                                                                                                                                                                                                                                                                                                                                                                                                                                                                                                                                                                                                                                                                                                                                                                                                                                                                                                                                                                                                                                                                                                                                                                                                                                                                                                                                                                                                                                                                                                                                                                                                                                                                                                                                                                                                                                                                                                                                                                                                                                                                                                                                                                                                                                                                                                                                                                                                                                                                                                                                                                                                                                                                                                                                                                                                                                                                                                                                                                                                                                                                                                                                                                                                                                                                                                                                                                                                                                                                                                                                                                                                                                                                                                                                                                                                                                                                                                                                                                                                                                                                                                                                                                                                                                                                                                                                                                                                                                                                                                                                                                                                                                                                                                                                                                                                                                                                                                                                                                                                                                                                                                                                                                                                                                                                                                                                                                                                                                                                                                                                                                                                                                                                                                                                                                                                                                                                                                                                                                                                                                                                                                                                                                                                                                                                                                                                                                                                                                                                                                                                                                                                                                                                                                                                                                                                                                                                                                                                                                                                                                                                                                                                                                                                                                                                                                                                                                 | Kudat Hospital                                                                                 | Institute for Medical Research, Infectious Disease Research Centre, National Institutes of Health, Ministry of Health Malaysia |  |                                                                                                                                                                                                                                                                                                                                                                                                                                                                | Azizan MA; Kamel K; Mohd Zawawi Z; Ramly N; Robert F; Suppiah J; Thayan R                                                                               |
| EPI_ISL_515182                                                                                                                                                                                                                                                                                                                                                                                                                                                                                                                                                                                                                                                                                                                                                                                                                                                                                                                                                                                                                                                                                                                                                                                                                                                                                                                                                                                                                                                                                                                                                                                                                                                                                                                                                                                                                                                                                                                                                                                                                                                                                                                                                                                                                                                                                                                                                                                                                                                                                                                                                                                                                                                                                                                                                                                                                                                                                                                                                                                                                                                                                                                                                                                                                                                                                                                                                                                                                                                                                                                                                                                                                                                                                                                                                                                                                                                                                                                                                                                                                                                                                                                                                                                                                                                                                                                                                                                                                                                                                                                                                                                                                                                                                                                                                                                                                                                                                                                                                                                                                                                                                                                                                                                                                                                                                                                                                                                                                                                                                                                                                                                                                                                                                                                                                                                                                                                                                                                                                                                                                                                                                                                                                                                                                                                                                                                                                                                                                                                                                                                                                                                                                                                                                                                                                                                                                                                                                                                                                                                                                                                                                                                                                                                                                                                                                                                                                                                                                                                                                                                                                                                                                                                                                                                                                                                                                                                                                                                                                                                                                                                                                                                                                                                                                                                                                                                                                                                                                                                                                                                                                                                                                                                                                                                                                                                                                                                                                                                                                                                                                                                                                                                                                                                                                                                                                                                                                                                                                                                                                                                                                                                                                                                                                                                                                                                                                                                                                                                                                                                                                                                                                                                                                                                                                                                                                                                                                                                                                                                                                                                                                                                                                                                                                                                                                                                                                                                                                                                                                                                                                                                                                                                                                                                                                                                                                                                                                                                                                                                                                                                                                                                                                                                                                                                                                                                                                                                                                                                                                                                                                                                                                                                                                                                                                                                                                                                                                                                                                                                                                                                                                                                                                                                                                                                                  | Kumasi Centre for Collaborative Research in Tropical Medicine, Kumasi.                         | Institute of Virology, Charité - Universitätsmedizin Berlin                                                                    |  | Augustina Sylverken; Christian Drosten; Eric Adu; Jesse Addo Asamoah; Julia Schneider; Jörn Beheim-Schwarzbach; Michael Owusu; Philip El-Duah; Richard Phillips.; Richmond Gorman; Richmond Yeboah; Sherihane Areyeety; Victor Max Corman                                                                                                                                                                                                                      |                                                                                                                                                         |
| EPI_ISL_2547368                                                                                                                                                                                                                                                                                                                                                                                                                                                                                                                                                                                                                                                                                                                                                                                                                                                                                                                                                                                                                                                                                                                                                                                                                                                                                                                                                                                                                                                                                                                                                                                                                                                                                                                                                                                                                                                                                                                                                                                                                                                                                                                                                                                                                                                                                                                                                                                                                                                                                                                                                                                                                                                                                                                                                                                                                                                                                                                                                                                                                                                                                                                                                                                                                                                                                                                                                                                                                                                                                                                                                                                                                                                                                                                                                                                                                                                                                                                                                                                                                                                                                                                                                                                                                                                                                                                                                                                                                                                                                                                                                                                                                                                                                                                                                                                                                                                                                                                                                                                                                                                                                                                                                                                                                                                                                                                                                                                                                                                                                                                                                                                                                                                                                                                                                                                                                                                                                                                                                                                                                                                                                                                                                                                                                                                                                                                                                                                                                                                                                                                                                                                                                                                                                                                                                                                                                                                                                                                                                                                                                                                                                                                                                                                                                                                                                                                                                                                                                                                                                                                                                                                                                                                                                                                                                                                                                                                                                                                                                                                                                                                                                                                                                                                                                                                                                                                                                                                                                                                                                                                                                                                                                                                                                                                                                                                                                                                                                                                                                                                                                                                                                                                                                                                                                                                                                                                                                                                                                                                                                                                                                                                                                                                                                                                                                                                                                                                                                                                                                                                                                                                                                                                                                                                                                                                                                                                                                                                                                                                                                                                                                                                                                                                                                                                                                                                                                                                                                                                                                                                                                                                                                                                                                                                                                                                                                                                                                                                                                                                                                                                                                                                                                                                                                                                                                                                                                                                                                                                                                                                                                                                                                                                                                                                                                                                                                                                                                                                                                                                                                                                                                                                                                                                                                                                                 | Kuruman Hospital                                                                               | National Health Laboratory Service/University of Cape Town (NHLS/UCT)                                                          |  |                                                                                                                                                                                                                                                                                                                                                                                                                                                                | Arash Iranzadeh; Bruna Galvao; Carolyn Williamson; Deelan Doolabh; Diana Hardie; Gert Marais; Innocent Mudau; Lynn Tyers; Marvin Hsiao; Stephen Korsman |
| EPI_ISL_2779525                                                                                                                                                                                                                                                                                                                                                                                                                                                                                                                                                                                                                                                                                                                                                                                                                                                                                                                                                                                                                                                                                                                                                                                                                                                                                                                                                                                                                                                                                                                                                                                                                                                                                                                                                                                                                                                                                                                                                                                                                                                                                                                                                                                                                                                                                                                                                                                                                                                                                                                                                                                                                                                                                                                                                                                                                                                                                                                                                                                                                                                                                                                                                                                                                                                                                                                                                                                                                                                                                                                                                                                                                                                                                                                                                                                                                                                                                                                                                                                                                                                                                                                                                                                                                                                                                                                                                                                                                                                                                                                                                                                                                                                                                                                                                                                                                                                                                                                                                                                                                                                                                                                                                                                                                                                                                                                                                                                                                                                                                                                                                                                                                                                                                                                                                                                                                                                                                                                                                                                                                                                                                                                                                                                                                                                                                                                                                                                                                                                                                                                                                                                                                                                                                                                                                                                                                                                                                                                                                                                                                                                                                                                                                                                                                                                                                                                                                                                                                                                                                                                                                                                                                                                                                                                                                                                                                                                                                                                                                                                                                                                                                                                                                                                                                                                                                                                                                                                                                                                                                                                                                                                                                                                                                                                                                                                                                                                                                                                                                                                                                                                                                                                                                                                                                                                                                                                                                                                                                                                                                                                                                                                                                                                                                                                                                                                                                                                                                                                                                                                                                                                                                                                                                                                                                                                                                                                                                                                                                                                                                                                                                                                                                                                                                                                                                                                                                                                                                                                                                                                                                                                                                                                                                                                                                                                                                                                                                                                                                                                                                                                                                                                                                                                                                                                                                                                                                                                                                                                                                                                                                                                                                                                                                                                                                                                                                                                                                                                                                                                                                                                                                                                                                                                                                                                                 | LAB-BMC                                                                                        | USAMRD-A, Basic Science Laboratory                                                                                             |  | Alan Lemtudo; Beth Mutai; Brian Andika; Carol Kifude; Clement Masakwe; Eric Muthanje; Esther Omuseni; Faith Sigei; Gathii Kimita; George Awinda; John Waitumbi; Josphat Nyataya; Rachel Githii; Rehema Liyai; Stephen Ochola                                                                                                                                                                                                                                   |                                                                                                                                                         |
| EPI_ISL_1313043                                                                                                                                                                                                                                                                                                                                                                                                                                                                                                                                                                                                                                                                                                                                                                                                                                                                                                                                                                                                                                                                                                                                                                                                                                                                                                                                                                                                                                                                                                                                                                                                                                                                                                                                                                                                                                                                                                                                                                                                                                                                                                                                                                                                                                                                                                                                                                                                                                                                                                                                                                                                                                                                                                                                                                                                                                                                                                                                                                                                                                                                                                                                                                                                                                                                                                                                                                                                                                                                                                                                                                                                                                                                                                                                                                                                                                                                                                                                                                                                                                                                                                                                                                                                                                                                                                                                                                                                                                                                                                                                                                                                                                                                                                                                                                                                                                                                                                                                                                                                                                                                                                                                                                                                                                                                                                                                                                                                                                                                                                                                                                                                                                                                                                                                                                                                                                                                                                                                                                                                                                                                                                                                                                                                                                                                                                                                                                                                                                                                                                                                                                                                                                                                                                                                                                                                                                                                                                                                                                                                                                                                                                                                                                                                                                                                                                                                                                                                                                                                                                                                                                                                                                                                                                                                                                                                                                                                                                                                                                                                                                                                                                                                                                                                                                                                                                                                                                                                                                                                                                                                                                                                                                                                                                                                                                                                                                                                                                                                                                                                                                                                                                                                                                                                                                                                                                                                                                                                                                                                                                                                                                                                                                                                                                                                                                                                                                                                                                                                                                                                                                                                                                                                                                                                                                                                                                                                                                                                                                                                                                                                                                                                                                                                                                                                                                                                                                                                                                                                                                                                                                                                                                                                                                                                                                                                                                                                                                                                                                                                                                                                                                                                                                                                                                                                                                                                                                                                                                                                                                                                                                                                                                                                                                                                                                                                                                                                                                                                                                                                                                                                                                                                                                                                                                                                 | LABORATOIRE ALPIGENE                                                                           | CNR Virus des Infections Respiratoires - France SUD                                                                            |  | Antonin Bal; Bruno Lina; Gregory Destras; Gwendolyne Burfin; Hadrien Regue; Laurence Josset; Martine Valette; Quentin Semanas                                                                                                                                                                                                                                                                                                                                  |                                                                                                                                                         |
| EPI_ISL_2629297                                                                                                                                                                                                                                                                                                                                                                                                                                                                                                                                                                                                                                                                                                                                                                                                                                                                                                                                                                                                                                                                                                                                                                                                                                                                                                                                                                                                                                                                                                                                                                                                                                                                                                                                                                                                                                                                                                                                                                                                                                                                                                                                                                                                                                                                                                                                                                                                                                                                                                                                                                                                                                                                                                                                                                                                                                                                                                                                                                                                                                                                                                                                                                                                                                                                                                                                                                                                                                                                                                                                                                                                                                                                                                                                                                                                                                                                                                                                                                                                                                                                                                                                                                                                                                                                                                                                                                                                                                                                                                                                                                                                                                                                                                                                                                                                                                                                                                                                                                                                                                                                                                                                                                                                                                                                                                                                                                                                                                                                                                                                                                                                                                                                                                                                                                                                                                                                                                                                                                                                                                                                                                                                                                                                                                                                                                                                                                                                                                                                                                                                                                                                                                                                                                                                                                                                                                                                                                                                                                                                                                                                                                                                                                                                                                                                                                                                                                                                                                                                                                                                                                                                                                                                                                                                                                                                                                                                                                                                                                                                                                                                                                                                                                                                                                                                                                                                                                                                                                                                                                                                                                                                                                                                                                                                                                                                                                                                                                                                                                                                                                                                                                                                                                                                                                                                                                                                                                                                                                                                                                                                                                                                                                                                                                                                                                                                                                                                                                                                                                                                                                                                                                                                                                                                                                                                                                                                                                                                                                                                                                                                                                                                                                                                                                                                                                                                                                                                                                                                                                                                                                                                                                                                                                                                                                                                                                                                                                                                                                                                                                                                                                                                                                                                                                                                                                                                                                                                                                                                                                                                                                                                                                                                                                                                                                                                                                                                                                                                                                                                                                                                                                                                                                                                                                                                 | LABORATOIRE L'ABO+ LV3                                                                         | CNR Virus des Infections Respiratoires - France SUD                                                                            |  | Antonin Bal; Bruno Lina; Gregory Destras; Gwendolyne Burfin; Hadrien Regue; Laurence Josset; Martine Valette; Quentin Semanas                                                                                                                                                                                                                                                                                                                                  |                                                                                                                                                         |
| EPI_ISL_2657871                                                                                                                                                                                                                                                                                                                                                                                                                                                                                                                                                                                                                                                                                                                                                                                                                                                                                                                                                                                                                                                                                                                                                                                                                                                                                                                                                                                                                                                                                                                                                                                                                                                                                                                                                                                                                                                                                                                                                                                                                                                                                                                                                                                                                                                                                                                                                                                                                                                                                                                                                                                                                                                                                                                                                                                                                                                                                                                                                                                                                                                                                                                                                                                                                                                                                                                                                                                                                                                                                                                                                                                                                                                                                                                                                                                                                                                                                                                                                                                                                                                                                                                                                                                                                                                                                                                                                                                                                                                                                                                                                                                                                                                                                                                                                                                                                                                                                                                                                                                                                                                                                                                                                                                                                                                                                                                                                                                                                                                                                                                                                                                                                                                                                                                                                                                                                                                                                                                                                                                                                                                                                                                                                                                                                                                                                                                                                                                                                                                                                                                                                                                                                                                                                                                                                                                                                                                                                                                                                                                                                                                                                                                                                                                                                                                                                                                                                                                                                                                                                                                                                                                                                                                                                                                                                                                                                                                                                                                                                                                                                                                                                                                                                                                                                                                                                                                                                                                                                                                                                                                                                                                                                                                                                                                                                                                                                                                                                                                                                                                                                                                                                                                                                                                                                                                                                                                                                                                                                                                                                                                                                                                                                                                                                                                                                                                                                                                                                                                                                                                                                                                                                                                                                                                                                                                                                                                                                                                                                                                                                                                                                                                                                                                                                                                                                                                                                                                                                                                                                                                                                                                                                                                                                                                                                                                                                                                                                                                                                                                                                                                                                                                                                                                                                                                                                                                                                                                                                                                                                                                                                                                                                                                                                                                                                                                                                                                                                                                                                                                                                                                                                                                                                                                                                                                                 | LABORATORIO CLINICA IMBANACO                                                                   | Instituto Nacional de Salud- Direccion de Investigación en Salud Pública                                                       |  | Carlos Franco-Muñoz; Carmen Osorio; Diana Malo; Diego A. Alvarez-Diaz; Diego Andrés Prada; Gerardo Santamaría; Hector Alejandro Ruiz-Moreno; Jhonnatan Reales-González; Jorge Rivera; Juan Camilo Martínez; Julian Naizaque; Katherine Laiton-Donato; Lisseth Pardo; Magdalena Wiesner; Marcela Mercado-Reyes; Maria T. Herrera-Sepúlveda; Marta Lopez Blanco; Martha Lucia Ospina Martínez; Paola Rojas; Sergio Gomez; Sheryll Corchuelo; Ángela Alarcon Cruz |                                                                                                                                                         |
| EPI_ISL_2272979                                                                                                                                                                                                                                                                                                                                                                                                                                                                                                                                                                                                                                                                                                                                                                                                                                                                                                                                                                                                                                                                                                                                                                                                                                                                                                                                                                                                                                                                                                                                                                                                                                                                                                                                                                                                                                                                                                                                                                                                                                                                                                                                                                                                                                                                                                                                                                                                                                                                                                                                                                                                                                                                                                                                                                                                                                                                                                                                                                                                                                                                                                                                                                                                                                                                                                                                                                                                                                                                                                                                                                                                                                                                                                                                                                                                                                                                                                                                                                                                                                                                                                                                                                                                                                                                                                                                                                                                                                                                                                                                                                                                                                                                                                                                                                                                                                                                                                                                                                                                                                                                                                                                                                                                                                                                                                                                                                                                                                                                                                                                                                                                                                                                                                                                                                                                                                                                                                                                                                                                                                                                                                                                                                                                                                                                                                                                                                                                                                                                                                                                                                                                                                                                                                                                                                                                                                                                                                                                                                                                                                                                                                                                                                                                                                                                                                                                                                                                                                                                                                                                                                                                                                                                                                                                                                                                                                                                                                                                                                                                                                                                                                                                                                                                                                                                                                                                                                                                                                                                                                                                                                                                                                                                                                                                                                                                                                                                                                                                                                                                                                                                                                                                                                                                                                                                                                                                                                                                                                                                                                                                                                                                                                                                                                                                                                                                                                                                                                                                                                                                                                                                                                                                                                                                                                                                                                                                                                                                                                                                                                                                                                                                                                                                                                                                                                                                                                                                                                                                                                                                                                                                                                                                                                                                                                                                                                                                                                                                                                                                                                                                                                                                                                                                                                                                                                                                                                                                                                                                                                                                                                                                                                                                                                                                                                                                                                                                                                                                                                                                                                                                                                                                                                                                                                                                 | LABORATORIO CLINICO LABIN                                                                      | Incienza, Instituto Costarricense de Investigación y Enseñanza en Nutrición y Salud                                            |  | Adriana Godínez; Claudio Soto-Garita; Estela Cordero; Francisco Duarte; Hebleen Porras; Joselyn Prado & Pei Ling Chan Ma; José Luis Vargas; Mariela Gutiérrez; Melany Calderón                                                                                                                                                                                                                                                                                 |                                                                                                                                                         |
| EPI_ISL_1403498                                                                                                                                                                                                                                                                                                                                                                                                                                                                                                                                                                                                                                                                                                                                                                                                                                                                                                                                                                                                                                                                                                                                                                                                                                                                                                                                                                                                                                                                                                                                                                                                                                                                                                                                                                                                                                                                                                                                                                                                                                                                                                                                                                                                                                                                                                                                                                                                                                                                                                                                                                                                                                                                                                                                                                                                                                                                                                                                                                                                                                                                                                                                                                                                                                                                                                                                                                                                                                                                                                                                                                                                                                                                                                                                                                                                                                                                                                                                                                                                                                                                                                                                                                                                                                                                                                                                                                                                                                                                                                                                                                                                                                                                                                                                                                                                                                                                                                                                                                                                                                                                                                                                                                                                                                                                                                                                                                                                                                                                                                                                                                                                                                                                                                                                                                                                                                                                                                                                                                                                                                                                                                                                                                                                                                                                                                                                                                                                                                                                                                                                                                                                                                                                                                                                                                                                                                                                                                                                                                                                                                                                                                                                                                                                                                                                                                                                                                                                                                                                                                                                                                                                                                                                                                                                                                                                                                                                                                                                                                                                                                                                                                                                                                                                                                                                                                                                                                                                                                                                                                                                                                                                                                                                                                                                                                                                                                                                                                                                                                                                                                                                                                                                                                                                                                                                                                                                                                                                                                                                                                                                                                                                                                                                                                                                                                                                                                                                                                                                                                                                                                                                                                                                                                                                                                                                                                                                                                                                                                                                                                                                                                                                                                                                                                                                                                                                                                                                                                                                                                                                                                                                                                                                                                                                                                                                                                                                                                                                                                                                                                                                                                                                                                                                                                                                                                                                                                                                                                                                                                                                                                                                                                                                                                                                                                                                                                                                                                                                                                                                                                                                                                                                                                                                                                                                 | LBA Casteljaloux                                                                               | Cerba Lab                                                                                                                      |  | Benazra M; Haim-Boukoba S; Lecorche E; Olivi M; Roquebert B; Trombert-Paolantoni S; Zimmer S                                                                                                                                                                                                                                                                                                                                                                   |                                                                                                                                                         |
| EPI_ISL_1253552, EPI_ISL_1253553, EPI_ISL_1253554, EPI_ISL_1287741, EPI_ISL_1287742, EPI_ISL_1287743, EPI_ISL_1287744, EPI_ISL_1287745, EPI_ISL_1287746, EPI_ISL_1287747, EPI_ISL_1287749, EPI_ISL_1287750, EPI_ISL_1287751, EPI_ISL_1287752, EPI_ISL_1287753, EPI_ISL_1287754, EPI_ISL_1287755, EPI_ISL_1287756, EPI_ISL_1287757, EPI_ISL_1287758, EPI_ISL_1287759, EPI_ISL_1287760, EPI_ISL_1287761, EPI_ISL_1287762, EPI_ISL_1287763, EPI_ISL_1287764, EPI_ISL_1287765, EPI_ISL_1287766, EPI_ISL_1287767, EPI_ISL_1287768, EPI_ISL_1287769, EPI_ISL_1287770, EPI_ISL_1287771, EPI_ISL_1287772, EPI_ISL_1287773, EPI_ISL_1287774, EPI_ISL_1287775, EPI_ISL_1287776, EPI_ISL_1287777, EPI_ISL_1287778, EPI_ISL_1287779, EPI_ISL_1287780, EPI_ISL_1287781, EPI_ISL_1287782, EPI_ISL_1287783, EPI_ISL_1287784, EPI_ISL_1287785, EPI_ISL_1287786, EPI_ISL_1287787, EPI_ISL_1287788, EPI_ISL_1287789, EPI_ISL_1287790, EPI_ISL_1287791, EPI_ISL_1287792, EPI_ISL_1287793, EPI_ISL_1287794, EPI_ISL_1287795, EPI_ISL_1287796, EPI_ISL_1287797, EPI_ISL_1287798, EPI_ISL_1287799, EPI_ISL_1287800, EPI_ISL_1287801, EPI_ISL_1287802, EPI_ISL_1287803, EPI_ISL_1287804, EPI_ISL_1287805, EPI_ISL_1287806, EPI_ISL_1287807, EPI_ISL_1287808, EPI_ISL_1287809, EPI_ISL_1287810, EPI_ISL_1287811, EPI_ISL_1287812, EPI_ISL_1287813, EPI_ISL_1287814, EPI_ISL_1287815, EPI_ISL_1287816, EPI_ISL_1287817, EPI_ISL_1287818, EPI_ISL_1287819, EPI_ISL_1287820, EPI_ISL_1287821, EPI_ISL_1287822, EPI_ISL_1287823, EPI_ISL_1287824, EPI_ISL_1287825, EPI_ISL_1287826, EPI_ISL_1287827, EPI_ISL_1287828, EPI_ISL_1287829, EPI_ISL_1287830, EPI_ISL_1287831, EPI_ISL_1287832, EPI_ISL_1287833, EPI_ISL_1287834, EPI_ISL_1287835, EPI_ISL_1287836, EPI_ISL_1287837, EPI_ISL_1287838, EPI_ISL_1287839, EPI_ISL_1287840, EPI_ISL_1287841, EPI_ISL_1287842, EPI_ISL_1287843, EPI_ISL_1287844, EPI_ISL_1287845, EPI_ISL_1287846, EPI_ISL_1287847, EPI_ISL_1287848, EPI_ISL_1287849, EPI_ISL_1287850, EPI_ISL_1287851, EPI_ISL_1287852, EPI_ISL_1287853, EPI_ISL_1287854, EPI_ISL_1287855, EPI_ISL_1287856, EPI_ISL_1287857, EPI_ISL_1287858, EPI_ISL_1287859, EPI_ISL_1287860, EPI_ISL_1287861, EPI_ISL_1287862, EPI_ISL_1287863, EPI_ISL_1287864, EPI_ISL_1287865, EPI_ISL_1287866, EPI_ISL_1287867, EPI_ISL_1287868, EPI_ISL_1287869, EPI_ISL_1287870, EPI_ISL_1287871, EPI_ISL_1287872, EPI_ISL_1287873, EPI_ISL_1287874, EPI_ISL_1287875, EPI_ISL_1287876, EPI_ISL_1287877, EPI_ISL_1287878, EPI_ISL_1287879, EPI_ISL_1287880, EPI_ISL_1287881, EPI_ISL_1287882, EPI_ISL_1287883, EPI_ISL_1287884, EPI_ISL_1287885, EPI_ISL_1287886, EPI_ISL_1287887, EPI_ISL_1287888, EPI_ISL_1287889, EPI_ISL_1287890, EPI_ISL_1287891, EPI_ISL_1287892, EPI_ISL_1287893, EPI_ISL_1287894, EPI_ISL_1287895, EPI_ISL_1287896, EPI_ISL_1287897, EPI_ISL_1287898, EPI_ISL_1287899, EPI_ISL_1287900, EPI_ISL_1287901, EPI_ISL_1287902, EPI_ISL_1287903, EPI_ISL_1287904, EPI_ISL_1287905, EPI_ISL_1287906, EPI_ISL_1287907, EPI_ISL_1287908, EPI_ISL_1287909, EPI_ISL_1287910, EPI_ISL_1287911, EPI_ISL_1287912, EPI_ISL_1287913, EPI_ISL_1287914, EPI_ISL_1287915, EPI_ISL_1287916, EPI_ISL_1287917, EPI_ISL_1287918, EPI_ISL_1287919, EPI_ISL_1287920, EPI_ISL_1287921, EPI_ISL_1287922, EPI_ISL_1287923, EPI_ISL_1287924, EPI_ISL_1287925, EPI_ISL_1287926, EPI_ISL_1287927, EPI_ISL_1287928, EPI_ISL_1287929, EPI_ISL_1287930, EPI_ISL_1287931, EPI_ISL_1287932, EPI_ISL_1287933, EPI_ISL_1287934, EPI_ISL_1287935, EPI_ISL_1287936, EPI_ISL_1287937, EPI_ISL_1287938, EPI_ISL_1287939, EPI_ISL_1287940, EPI_ISL_1287941, EPI_ISL_1287942, EPI_ISL_1287943, EPI_ISL_1287944, EPI_ISL_1287945, EPI_ISL_1287946, EPI_ISL_1287947, EPI_ISL_1287948, EPI_ISL_1287949, EPI_ISL_1287950, EPI_ISL_1287951, EPI_ISL_1287952, EPI_ISL_1287953, EPI_ISL_1287954, EPI_ISL_1287955, EPI_ISL_1287956, EPI_ISL_1287957, EPI_ISL_1287958, EPI_ISL_1287959, EPI_ISL_1287960, EPI_ISL_1287961, EPI_ISL_1287962, EPI_ISL_1287963, EPI_ISL_1287964, EPI_ISL_1287965, EPI_ISL_1287966, EPI_ISL_1287967, EPI_ISL_1287968, EPI_ISL_1287969, EPI_ISL_1287970, EPI_ISL_1287971, EPI_ISL_1287972, EPI_ISL_1287973, EPI_ISL_1287974, EPI_ISL_1287975, EPI_ISL_1287976, EPI_ISL_1287977, EPI_ISL_1287978, EPI_ISL_1287979, EPI_ISL_1287980, EPI_ISL_1287981, EPI_ISL_1287982, EPI_ISL_1287983, EPI_ISL_1287984, EPI_ISL_1287985, EPI_ISL_1287986, EPI_ISL_1287987, EPI_ISL_1287988, EPI_ISL_1287989, EPI_ISL_1287990, EPI_ISL_1287991, EPI_ISL_1287992, EPI_ISL_1287993, EPI_ISL_1287994, EPI_ISL_1287995, EPI_ISL_1287996, EPI_ISL_1287997, EPI_ISL_1287998, EPI_ISL_1287999, EPI_ISL_1290000, EPI_ISL_1290001, EPI_ISL_1290002, EPI_ISL_1290003, EPI_ISL_1290004, EPI_ISL_1290005, EPI_ISL_1290006, EPI_ISL_1290007, EPI_ISL_1290008, EPI_ISL_1290009, EPI_ISL_1290010, EPI_ISL_1290011, EPI_ISL_1290012, EPI_ISL_1290013, EPI_ISL_1290014, EPI_ISL_1290015, EPI_ISL_1290016, EPI_ISL_1290017, EPI_ISL_1290018, EPI_ISL_1290019, EPI_ISL_1290020, EPI_ISL_1290021, EPI_ISL_1290022, EPI_ISL_1290023, EPI_ISL_1290024, EPI_ISL_1290025, EPI_ISL_1290026, EPI_ISL_1290027, EPI_ISL_1290028, EPI_ISL_1290029, EPI_ISL_1290030, EPI_ISL_1290031, EPI_ISL_1290032, EPI_ISL_1290033, EPI_ISL_1290034, EPI_ISL_1290035, EPI_ISL_1290036, EPI_ISL_1290037, EPI_ISL_1290038, EPI_ISL_1290039, EPI_ISL_1290040, EPI_ISL_1290041, EPI_ISL_1290042, EPI_ISL_1290043, EPI_ISL_1290044, EPI_ISL_1290045, EPI_ISL_1290046, EPI_ISL_1290047, EPI_ISL_1290048, EPI_ISL_1290049, EPI_ISL_1290050, EPI_ISL_1290051, EPI_ISL_1290052, EPI_ISL_1290053, EPI_ISL_1290054, EPI_ISL_1290055, EPI_ISL_1290056, EPI_ISL_1290057, EPI_ISL_1290058, EPI_ISL_1290059, EPI_ISL_1290060, EPI_ISL_1290061, EPI_ISL_1290062, EPI_ISL_1290063, EPI_ISL_1290064, EPI_ISL_1290065, EPI_ISL_1290066, EPI_ISL_1290067, EPI_ISL_1290068, EPI_ISL_1290069, EPI_ISL_1290070, EPI_ISL_1290071, EPI_ISL_1290072, EPI_ISL_1290073, EPI_ISL_1290074, EPI_ISL_1290075, EPI_ISL_1290076, EPI_ISL_1290077, EPI_ISL_1290078, EPI_ISL_1290079, EPI_ISL_1290080, EPI_ISL_1290081, EPI_ISL_1290082, EPI_ISL_1290083, EPI_ISL_1290084, EPI_ISL_1290085, EPI_ISL_1290086, EPI_ISL_1290087, EPI_ISL_1290088, EPI_ISL_1290089, EPI_ISL_1290090, EPI_ISL_1290091, EPI_ISL_1290092, EPI_ISL_1290093, EPI_ISL_1290094, EPI_ISL_1290095, EPI_ISL_1290096, EPI_ISL_1290097, EPI_ISL_1290098, EPI_ISL_1290099, EPI_ISL_1290100, EPI_ISL_1290101, EPI_ISL_1290102, EPI_ISL_1290103, EPI_ISL_1290104, EPI_ISL_1290105, EPI_ISL_1290106, EPI_ISL_1290107, EPI_ISL_1290108, EPI_ISL_1290109, EPI_ISL_1290110, EPI_ISL_1290111, EPI_ISL_1290112, EPI_ISL_1290113, EPI_ISL_1290114, EPI_ISL_1290115, EPI_ISL_1290116, EPI_ISL_1290117, EPI_ISL_1290118, EPI_ISL_1290119, EPI_ISL_1290120, EPI_ISL_1290121, EPI_ISL_1290122, EPI_ISL_1290123, EPI_ISL_1290124, EPI_ISL_1290125, EPI_ISL_1290126, EPI_ISL_1290127, EPI_ISL_1290128, EPI_ISL_1290129, EPI_ISL_1290130, EPI_ISL_1290131, EPI_ISL_1290132, EPI_ISL_1290133, EPI_ISL_1290134, EPI_ISL_1290135, EPI_ISL_1290136, EPI_ISL_1290137, EPI_ISL_1290138, EPI_ISL_1290139, EPI_ISL_1290140, EPI_ISL_1290141, EPI_ISL_1290142, EPI_ISL_1290143, EPI_ISL_1290144, EPI_ISL_1290145, EPI_ISL_1290146, EPI_ISL_1290147, EPI_ISL_1290148, EPI_ISL_1290149, EPI_ISL_1290150, EPI_ISL_1290151, EPI_ISL_1290152, EPI_ISL_1290153, EPI_ISL_1290154, EPI_ISL_1290155, EPI_ISL_1290156, EPI_ISL_1290157, EPI_ISL_1290158, EPI_ISL_1290159, EPI_ISL_1290160, EPI_ISL_1290161, EPI_ISL_1290162, EPI_ISL_1290163, EPI_ISL_1290164, EPI_ISL_1290165, EPI_ISL_1290166, EPI_ISL_1290167, EPI_ISL_1290168, EPI_ISL_1290169, EPI_ISL_1290170, EPI_ISL_1290171, EPI_ISL_1290172, EPI_ISL_1290173, EPI_ISL_1290174, EPI_ISL_1290175, EPI_ISL_1290176, EPI_ISL_1290177, EPI_ISL_1290178, EPI_ISL_1290179, EPI_ISL_1290180, EPI_ISL_1290181, EPI_ISL_1290182, EPI_ISL_1290183, EPI_ISL_1290184, EPI_ISL_1290185, EPI_ISL_1290186, EPI_ISL_1290187, EPI_ISL_1290188, EPI_ISL_1290189, EPI_ISL_1290190, EPI_ISL_1290191, EPI_ISL_1290192, EPI_ISL_1290193, EPI_ISL_1290194, EPI_ISL_1290195, EPI_ISL_1290196, EPI_ISL_1290197, EPI_ISL_1290198, EPI_ISL_1290199, EPI_ISL_1290200, EPI_ISL_1290201, EPI_ISL_1290202, EPI_ISL_1290203, EPI_ISL_1290204, EPI_ISL_1290205, EPI_ISL_1290206, EPI_ISL_1290207, EPI_ISL_1290208, EPI_ISL_1290209, EPI_ISL_1290210, EPI_ISL_1290211, EPI_ISL_1290212, EPI_ISL_1290213, EPI_ISL_1290214, EPI_ISL_1290215, EPI_ISL_1290216, EPI_ISL_1290217, EPI_ISL_1290218, EPI_ISL_1290219, EPI_ISL_1290220, EPI_ISL_1290221, EPI_ISL_1290222, EPI_ISL_1290223, EPI_ISL_1290224, EPI_ISL_1290225, EPI_ISL_1290226, EPI_ISL_1290227, EPI_ISL_1290228, EPI_ISL_1290229, EPI_ISL_1290230, EPI_ISL_1290231, EPI_ISL_1290232, EPI_ISL_1290233, EPI_ISL_1290234, EPI_ISL_1290235, EPI_ISL_1290236, EPI_ISL_1290237, EPI_ISL_1290238, EPI_ISL_1290239, EPI_ISL_1290240, EPI_ISL_1290241, EPI_ISL_1290242, EPI_ISL_1290243, EPI_ISL_1290244, EPI_ISL_1290245, EPI_ISL_1290246, EPI_ISL_1290247, EPI_ISL_1290248, EPI_ISL_1290249, EPI_ISL_1290250, EPI_ISL_1290251, EPI_ISL_1290252, EPI_ISL_1290253, EPI_ISL_1290254, EPI_ISL_1290255, EPI_ISL_1290256, EPI_ISL_1290257, EPI_ISL_1290258, EPI_ISL_1290259, EPI_ISL_1290260, EPI_ISL_1290261, EPI_ISL_1290262, EPI_ISL_1290263, EPI_ISL_1290264, EPI_ISL_1290265, EPI_ISL_1290266, EPI_ISL_1290267, EPI_ISL_1290268, EPI_ISL_1290269, EPI_ISL_1290270, EPI_ISL_1290271, EPI_ISL_1290272, EPI_ISL_1290273, EPI_ISL_1290274, EPI_ISL_1290275, EPI_ISL_1290276, EPI_ISL_1290277, EPI_ISL_1290278, EPI_ISL_1290279, EPI_ISL_1290280, EPI_ISL_1290281, EPI_ISL_1290282, EPI_ISL_1290283, EPI_ISL_1290284, EPI_ISL_1290285, EPI_ISL_1290286, EPI_ISL_1290287, EPI_ISL_1290288, EPI_ISL_1290289, EPI_ISL_1290290, EPI_ISL_1290291, EPI_ISL_1290292, EPI_ISL_1290293, EPI_ISL_1290294, EPI_ISL_1290295, EPI_ISL_1290296, EPI_ISL_1290297, EPI_ISL_1290298, EPI_ISL_1290299, EPI_ISL_1290300, EPI_ISL_1290301, EPI_ISL_1290302, EPI_ISL_1290303, EPI_ISL_1290304, EPI_ISL_1290305, EPI_ISL_1290306, EPI_ISL_1290307, EPI_ISL_1290308, EPI_ISL_1290309, EPI_ISL_1290310, EPI_ISL_1290311, EPI_ISL_1290312, EPI_ISL_1290313, EPI_ISL_1290314, EPI_ISL_1290315, EPI_ISL_1290316, EPI_ISL_1290317, EPI_ISL_1290318, EPI_ISL_1290319, EPI_ISL_1290320, EPI_ISL_1290321, EPI_ISL_1290322, EPI_ISL_1290323, EPI_ISL_1290324, EPI_ISL_1290325, EPI_ISL_1290326, EPI_ISL_1290327, EPI_ISL_1290328, EPI_ISL_1290329, EPI_ISL_1290330, EPI_ISL_1290331, EPI_ISL_1290332, EPI_ISL_1290333, EPI_ISL_1290334, EPI_ISL_1290335, EPI_ISL_1290336, EPI_ISL_1290337, EPI_ISL_1290338, EPI_ISL_1290339, EPI_ISL_1290340, EPI_ISL_1290341, EPI_ISL_1290342, EPI_ISL_1290343, EPI_ISL_1290344, EPI_ISL_1290345, EPI_ISL_1290346, EPI_ISL_1290347, EPI_ISL_1290348, EPI_ISL_1290349, EPI_ISL_1290350, EPI_ISL_1290351, EPI_ISL_1290352, EPI_ISL_1290353, EPI_ISL_1290354, EPI_ISL_1290355, EPI_ISL_1290356, EPI_ISL_1290357, EPI_ISL_1290358, EPI_ISL_1290359, EPI_ISL_1290360, EPI_ISL_1290361, EPI_ISL_1290362, EPI_ISL_1290363, EPI_ISL_1290364, EPI_ISL_1290365, EPI_ISL_1290366, EPI_ISL_1290367, EPI_ISL_1290368, EPI_ISL_1290369, EPI_ISL_1290370, EPI_ISL_1290371, EPI_ISL_1290372, EPI_ISL_1290373, EPI_ISL_1290374, EPI_ISL_1290375, EPI_ISL_1290376, EPI_ISL_1290377, EPI_ISL_1290378, EPI_ISL_1290379, EPI_ISL_1290380, EPI_ISL_1290381, EPI_ISL_1290382, EPI_ISL_1290383, EPI_ISL_1290384, EPI_ISL_1290385, EPI_ISL_1290386, EPI_ISL_1290387, EPI_ISL_1290388, EPI_ISL_1290389, EPI_ISL_1290390, EPI_ISL_1290391, EPI_ISL_1290392, EPI_ISL_1290393, EPI_ISL_1290394, EPI_ISL_1290395, EPI_ISL_1290396, EPI_ISL_1290397, EPI_ISL_1290398, EPI_ISL_1290399, EPI_ISL_1290400, EPI_ISL_1290401, EPI_ISL_1290402, EPI_ISL_1290403, EPI_ISL_1290404, EPI_ISL_1290405, EPI_ISL_1290406, EPI_ISL_1290407, EPI_ISL_1290408, EPI_ISL_1290409, EPI_ISL_1290410, EPI_ISL_1290411, EPI_ISL_1290412, EPI_ISL_1290413, EPI_ISL_1290414, EPI_ISL_1290415, EPI_ISL_1290416, EPI_ISL_1290417, EPI_ISL_1290418, EPI_ISL_1290419, EPI_ISL_1290420, EPI_ISL_1290421, EPI_ISL_1290422, EPI_ISL_1290423, EPI_ISL_1290424, EPI_ISL_1290425, EPI_ISL_1290426, EPI_ISL_1290427, EPI_ISL_1290428, EPI_ISL_1290429, EPI_ISL_1290430, EPI_ISL_1290431, EPI_ISL_1290432, EPI_ISL_1290433, EPI_ISL_1290434, EPI_ISL_1290435, EPI_ISL_1290436, EPI_ISL_1290437, EPI_ISL_1290438, EPI_ISL_1290439, EPI_ISL_1290440, EPI_ISL_1290441, EPI_ISL_1290442, EPI_ISL_1290443, EPI_ISL_1290444, EPI_ISL_1290445, EPI_ISL_1290446, EPI_ISL_1290447, EPI_ISL_1290448, EPI_ISL_1290449, EPI_ISL_1290450, EPI_ISL_1290451, EPI_ISL_1290452, EPI_ISL_1290453, EPI_ISL_1290454, EPI_ISL_1290455, EPI_ISL_1290456, EPI_ISL_1290457, EPI_ISL_1290458, |                                                                                                |                                                                                                                                |  |                                                                                                                                                                                                                                                                                                                                                                                                                                                                |                                                                                                                                                         |

|                                                                                                                                                                                                                                                               |                                                                                                                                                                                                                       |                                                                                                                                                                       |                                                                                                                                                                                                                                                                                                                                                                                                                                                                                                                                                                                                                                                                                                                                                                                                                                                                                                                                                                                                                                                                                                                                                                                                                                                                                                                                                                                                                                                                                                                                                                                                                                        |
|---------------------------------------------------------------------------------------------------------------------------------------------------------------------------------------------------------------------------------------------------------------|-----------------------------------------------------------------------------------------------------------------------------------------------------------------------------------------------------------------------|-----------------------------------------------------------------------------------------------------------------------------------------------------------------------|----------------------------------------------------------------------------------------------------------------------------------------------------------------------------------------------------------------------------------------------------------------------------------------------------------------------------------------------------------------------------------------------------------------------------------------------------------------------------------------------------------------------------------------------------------------------------------------------------------------------------------------------------------------------------------------------------------------------------------------------------------------------------------------------------------------------------------------------------------------------------------------------------------------------------------------------------------------------------------------------------------------------------------------------------------------------------------------------------------------------------------------------------------------------------------------------------------------------------------------------------------------------------------------------------------------------------------------------------------------------------------------------------------------------------------------------------------------------------------------------------------------------------------------------------------------------------------------------------------------------------------------|
| EPI_ISL_2686246                                                                                                                                                                                                                                               | Congo<br>Laboratoire National de Référence pour les Fièvres Hémorragiques Virales, Centre Muraz                                                                                                                       | Centre Muraz                                                                                                                                                          | Ange Badjo; Arsène Zongo; Essia Belarbi; Fabian Leendertz; Grit Schubert; Jasmin Schlotterbeck; Saïdou Ouedraogo; Soumeiya Ouangraoua; Thérèse Kagone                                                                                                                                                                                                                                                                                                                                                                                                                                                                                                                                                                                                                                                                                                                                                                                                                                                                                                                                                                                                                                                                                                                                                                                                                                                                                                                                                                                                                                                                                  |
| EPI_ISL_1972308                                                                                                                                                                                                                                               | Laboratoire National de Santé Publique du Cameroun                                                                                                                                                                    | Pathogen Genomics Lab, National Institute for Biomedical Research (INRB)                                                                                              | Amuri Aziza; Andrew Rambaut; Catherine Pratt; Eddy Kinganda-Lusamaki; Edith Nkwenbe; Emmanuel Lokilo Lofiko; Francisca Muyembe Mawete; Gabriel Kabamba; Ian Goodfellow; Jean Claude Makangara; Jean-Jacques Muyembe Tamfum; Josh Quick; Marie Claire Okomo; Matthias Pauthner; Michael Wiley; Nick Loman; Placide Mbala-Kingebeni; Raphael Lumemba; Steve Ahuka-Mundeke; Trevor Bedford                                                                                                                                                                                                                                                                                                                                                                                                                                                                                                                                                                                                                                                                                                                                                                                                                                                                                                                                                                                                                                                                                                                                                                                                                                                |
| EPI_ISL_2157559,<br>EPI_ISL_2157562,<br>EPI_ISL_2157568,<br>EPI_ISL_2492505,<br>EPI_ISL_2492530                                                                                                                                                               | Laboratoire National de Santé Publique - LNSP (HAITI - LNSP)                                                                                                                                                          | Laboratory of Respiratory Viruses and Measles, Oswaldo Cruz Institute, FIOCRUZ                                                                                        | Alice Sampaio Rocha; Ana Carolina Mendonca; Anna Carolina Paixao; Elisa Cavalcante Pereira; Fernando Motta; Ito Journe; Jaques Boncy; Luciana Appolinario; Marilda Siqueira on behalf of the Fiocruz COVID-19 Genomic Surveillance Network; Paola Resende; Patrick Delly; Renata Serrano Lopes; Taina Venas                                                                                                                                                                                                                                                                                                                                                                                                                                                                                                                                                                                                                                                                                                                                                                                                                                                                                                                                                                                                                                                                                                                                                                                                                                                                                                                            |
| EPI_ISL_3360861                                                                                                                                                                                                                                               | Laboratoire Professeur Daniel GAHOUMA (LPDG)                                                                                                                                                                          | Centre de Recherches Médicales de Lambaréné (CERMEC)                                                                                                                  | Ayong More; Bertrand Lell; Davy Leger Mouangala; Elyvre Mbongo-Nkama; Emilio Skarwan; Georgelin Nguema Ondo; Guy Stéphane Padzys; Gédéon Prince Manouana; Jean Bernard Lekana-Douki; Joël-Fleury Djoba Siawaya and Ayola Akim Adegnika; Kevine Zang Ella; Ludovic Mewono; Moustapha Nzamba Maloum; Noé Patrick Mborndoukwe; Rodrigue Bikangui; Rodrigue Mints Nguema; Sam O'neilla Oye Bingono; Samira Zoa Assoumou; Sandrine Zeh Nfor; Srinivas reddy Pallarla; Steffen Bormann; Thirumalaisamy P. Velavan                                                                                                                                                                                                                                                                                                                                                                                                                                                                                                                                                                                                                                                                                                                                                                                                                                                                                                                                                                                                                                                                                                                            |
| EPI_ISL_1760554                                                                                                                                                                                                                                               | Laboratoire Professeur Daniel GAHOUMA (LPDG)                                                                                                                                                                          | Centre de recherches médicales de Lambaréné (CERMEC)                                                                                                                  | Ayola A. Adegnika; Ayong Moure; Bertrand Lell; Bénédicte Ndeoboko; Emilio Skarwan; Georgelin Nguema Ondo; Gédéon P. Manouana; Haruka Abe; Jiro Yasuda; Joel Fleury Djoba Siawaya; Rodrigue Bikangui; Rotimi Myrabelle Avome Houechehou; Samira Zoa-Assoumou; Yuri Ushijima                                                                                                                                                                                                                                                                                                                                                                                                                                                                                                                                                                                                                                                                                                                                                                                                                                                                                                                                                                                                                                                                                                                                                                                                                                                                                                                                                             |
| EPI_ISL_1103576, EPI_ISL_1116470, EPI_ISL_1159697, EPI_ISL_1159698, EPI_ISL_1810938, EPI_ISL_1810947, EPI_ISL_1904692, EPI_ISL_1904846, EPI_ISL_1904876, EPI_ISL_1904886, EPI_ISL_1904887                                                                     | see above                                                                                                                                                                                                             | Laboratoire central de Virologie                                                                                                                                      | Abdelmunim Essabbar; Amal Zouaki; Ghizlane EL Amin; Hakima Kabbaï; Lahcen Belyamani and Azeddine Ibrahim; Mouna Ouadhiri; Myriam Sefar; Saïd Amzazi; Tarik Aanniz                                                                                                                                                                                                                                                                                                                                                                                                                                                                                                                                                                                                                                                                                                                                                                                                                                                                                                                                                                                                                                                                                                                                                                                                                                                                                                                                                                                                                                                                      |
| EPI_ISL_2227197, EPI_ISL_2227198, EPI_ISL_2227199, EPI_ISL_2227200, EPI_ISL_2227201, EPI_ISL_2227202, EPI_ISL_2227203                                                                                                                                         | see above                                                                                                                                                                                                             | Laboratoire d'analyse biomédicale du camp Ouezzin Coulibaly                                                                                                           | Abdoul-Salam Ouedraogo; Amariane Koné; Armel Podá; Arsène Zongo; Essia Belarbi; Fabian Leendertz; Grit Schubert; Halidou Tinto; Soumeiya Ouangraoua; Thérèse Kagone; Yacouba Sawadogo; Zekiba Tarnagda                                                                                                                                                                                                                                                                                                                                                                                                                                                                                                                                                                                                                                                                                                                                                                                                                                                                                                                                                                                                                                                                                                                                                                                                                                                                                                                                                                                                                                 |
| EPI_ISL_660446, EPI_ISL_660448, EPI_ISL_660450, EPI_ISL_660451, EPI_ISL_660452, EPI_ISL_660481, EPI_ISL_660493, EPI_ISL_660503, EPI_ISL_660509, EPI_ISL_2142708, EPI_ISL_2142743                                                                              | see above                                                                                                                                                                                                             | Laboratoire de Microbiologie CHU Sourou Sanou                                                                                                                         | Abdoul-Salam Ouedraogo; Amariane Koné; Armel Podá; Arsène Zongo; Essia Belarbi; Fabian Leendertz; Grit Schubert; Halidou Tinto; Lassana Sangaré; Soumeiya Ouangraoua; Thérèse Kagone; Yacouba Sawadogo; Zekiba Tarnagda                                                                                                                                                                                                                                                                                                                                                                                                                                                                                                                                                                                                                                                                                                                                                                                                                                                                                                                                                                                                                                                                                                                                                                                                                                                                                                                                                                                                                |
| EPI_ISL_2289102,<br>EPI_ISL_2289104,<br>EPI_ISL_2289107,<br>EPI_ISL_2289121,<br>EPI_ISL_2289123                                                                                                                                                               | Laboratoire de Microbiologie CHU Sourou Sanou                                                                                                                                                                         | Laboratoire bacteriologie virologie CHUSS                                                                                                                             | Abdoul-Salam Ouedraogo; Abdoullie Kante; Abdul Sesay; Annette Erhart; Armel Podá; François Kiemdé; Halidou Tinto; Mariama Kujabi; Yacouba Sawadogo                                                                                                                                                                                                                                                                                                                                                                                                                                                                                                                                                                                                                                                                                                                                                                                                                                                                                                                                                                                                                                                                                                                                                                                                                                                                                                                                                                                                                                                                                     |
| EPI_ISL_1116464,<br>EPI_ISL_1116467,<br>EPI_ISL_1116468,<br>EPI_ISL_1118675                                                                                                                                                                                   | Laboratoire de Microbiologie- CHU Habib Bourguiba - Sfax                                                                                                                                                              | Laboratoire des Procédés de Criblage Moléculaire et Cellulaire- Centre de Biotechnologie de Sfax                                                                      | A. and Masmoudi, S.; Abdelmoulah, F.; Abid, N.; Ajili, F.; Aouni, M.; Ben Ayed, I.; Bensaid, M.; Chtourou, A.; Elargoubi, A.; Fki-berrajah, L.; Gaaloul, I.; Gargouri, S.; Hammami, A.; Kamoun, S.; Karray Hakim, H.; Kharat, N.; Mastouri, M.; Mhalla, S.; Nabli, A.; Rebai; Smeti, I.; Souissi, A.; Stambouli, N.; Turki, M.                                                                                                                                                                                                                                                                                                                                                                                                                                                                                                                                                                                                                                                                                                                                                                                                                                                                                                                                                                                                                                                                                                                                                                                                                                                                                                         |
| EPI_ISL_1241662,<br>EPI_ISL_1403098,<br>EPI_ISL_3143818                                                                                                                                                                                                       | Laboratoire de santé publique du Québec                                                                                                                                                                               | Laboratoire de santé publique du Québec                                                                                                                               | Guillaume Bourque; Ioannis Ragoussis; Jesse Shapiro; Mark Lathrop and Michel Roger on behalf of the CoVSeQ research group; Mark Lathrop and Michel Roger on behalf of the CoVSeQ research group ( <a href="http://covseq.ca/researchgroup">http://covseq.ca/researchgroup</a> ); Sandrine Moreira                                                                                                                                                                                                                                                                                                                                                                                                                                                                                                                                                                                                                                                                                                                                                                                                                                                                                                                                                                                                                                                                                                                                                                                                                                                                                                                                      |
| EPI_ISL_1207287,<br>EPI_ISL_1208160,<br>EPI_ISL_1208398,<br>EPI_ISL_1208399                                                                                                                                                                                   | Laboratoire de virologie clinique - Institut Pasteur de Tunis                                                                                                                                                         | 1-Laboratory of Microbiology, National Reference Lab, Charles Nicolle Hospital; 2-University of Tunis ElManar, Faculty of Medicine of Tunis, LR99E509, Tunis, Tunisia | Alia BenKahla; Anissa Chouikha; Fares Wasfi; Henda Triki; Ithem Boutiba-Ben Boubakar.; Imen Kacem; Ines Mdini; Jalila Ben Khelil; Maher Kharrat; Manel Ben Sassi; Mariem Gdoura; Mouna Ben Sassi; Mouna Safer; Nissaf Ben Alaya; Riadh Daghfous; Riadh Gouider; Roua Ben Othman; Salma Abid; Sameh Trabelsi; Sana Ferjani; Sara Chamman; Sondes Haddad                                                                                                                                                                                                                                                                                                                                                                                                                                                                                                                                                                                                                                                                                                                                                                                                                                                                                                                                                                                                                                                                                                                                                                                                                                                                                 |
| EPI_ISL_476825                                                                                                                                                                                                                                                | Laboratoire des Fièvres Hémorragiques Virales du Benin                                                                                                                                                                | Charité-Universitätsmedizin Berlin                                                                                                                                    | Anges; Drexler; Jan Felix; Moreira-Soto Andres; Sander Anna-Lena; Yadouleton                                                                                                                                                                                                                                                                                                                                                                                                                                                                                                                                                                                                                                                                                                                                                                                                                                                                                                                                                                                                                                                                                                                                                                                                                                                                                                                                                                                                                                                                                                                                                           |
| EPI_ISL_2932537, EPI_ISL_2932558, EPI_ISL_2932562, EPI_ISL_2958658, EPI_ISL_2958659, EPI_ISL_2958660, EPI_ISL_2958661, EPI_ISL_2958663, EPI_ISL_2958665, EPI_ISL_2958666, EPI_ISL_2958667, EPI_ISL_2958668, EPI_ISL_2958669, EPI_ISL_2958670, EPI_ISL_2958671 | see above                                                                                                                                                                                                             | Laboratoire des Fièvres Hémorragiques Virales du Benin                                                                                                                | Andres Moreira-Soto; Anges Yadouleton; Anna-Lena Sander; Benjamin Houkpatrick and Jan Felix Drexler; Carine Tchibozo; Christian Drosten; Dossou Ange; Eclou Sedjo; Edmilson F de Oliveira Filho; Gildas Hounkanrin; Hinson Fidelia; Keke K. René; Mamoudou Harouna Djingarey; Melchior A. Joël Aissi; Michael Nagel; Ofert Landt; Praise Adewumi; Salifou Sourakatou; Victor Max Corman; Wendy Karen Jo; Yvette Badou                                                                                                                                                                                                                                                                                                                                                                                                                                                                                                                                                                                                                                                                                                                                                                                                                                                                                                                                                                                                                                                                                                                                                                                                                  |
| EPI_ISL_1383629,<br>EPI_ISL_1383630,<br>EPI_ISL_1918209                                                                                                                                                                                                       | Laboratoire national de sante, Microbiology, Virology                                                                                                                                                                 | Laboratoire national de sante, Microbiology, Microbial Genomics Platform                                                                                              | Anke Wienecke-Baldacchino; Catherine Ragimbeau; Fatu Djabi; Jessica Tapp; Lise Pignon; Raoul Salmon; Tamir Abdelrahman; Trung Nguyen Nguyen                                                                                                                                                                                                                                                                                                                                                                                                                                                                                                                                                                                                                                                                                                                                                                                                                                                                                                                                                                                                                                                                                                                                                                                                                                                                                                                                                                                                                                                                                            |
| EPI_ISL_740028,<br>EPI_ISL_744958,<br>EPI_ISL_745024                                                                                                                                                                                                          | Laboratoire national de santé, Microbiology, Virology                                                                                                                                                                 | Laboratoire national de santé, Microbiology, Microbial Genomics Platform                                                                                              | Anke Wienecke-Baldacchino; Catherine Ragimbeau; Fatu Djabi; Jessica Tapp; Lise Pignon; Raoul Salmon; Tamir Abdelrahman                                                                                                                                                                                                                                                                                                                                                                                                                                                                                                                                                                                                                                                                                                                                                                                                                                                                                                                                                                                                                                                                                                                                                                                                                                                                                                                                                                                                                                                                                                                 |
| EPI_ISL_2400636                                                                                                                                                                                                                                               | Laboratoires d'analyses médicales - Ketterhill                                                                                                                                                                        | Laboratoire national de sante, Microbiology, Microbial Genomics Platform                                                                                              | Anke Wienecke-Baldacchino; Caroline Scheiber; Catherine Ragimbeau; Fatu Djabi; Jessica Tapp; Lise Pignon; Raoul Salmon; Serge Vedy; Tamir Abdelrahman                                                                                                                                                                                                                                                                                                                                                                                                                                                                                                                                                                                                                                                                                                                                                                                                                                                                                                                                                                                                                                                                                                                                                                                                                                                                                                                                                                                                                                                                                  |
| EPI_ISL_1719751                                                                                                                                                                                                                                               | Laboratori Clinic Territorial de Girona                                                                                                                                                                               | Can Ruti SARS-CoV-2 Sequencing Hub (HUGTIP/IrsiCaixa/IGTP)                                                                                                            | Alba Sanchez; Anna Not; Antoni E Bordoy; Bonaventura Clotet; Cristina Casan; Cristina Esteban; Francesc Catala-Moll; Gemma Clara; Ignacio Blanco; Marc Noguera-Julian; Maria Casadella; Mariona Parera; Mercedes Guerrero; Montserrat Gimenez; Pere-Joan Cardona; Pilar Armengol; Roger Paredes; Verónica Saludes; and Elisa Martró on behalf of the Can Ruti SARS-CoV-2 Sequencing Hub.                                                                                                                                                                                                                                                                                                                                                                                                                                                                                                                                                                                                                                                                                                                                                                                                                                                                                                                                                                                                                                                                                                                                                                                                                                               |
| EPI_ISL_1831644,<br>EPI_ISL_1892959,<br>EPI_ISL_2000095,<br>EPI_ISL_2000110                                                                                                                                                                                   | Laboratori Clinic Territorial de Girona                                                                                                                                                                               | Can Ruti SARS-CoV-2 Sequencing Hub (HUGTIP/IrsiCaixa/IGTP)                                                                                                            | Alba Sánchez; Anna Not; Antoni E Bordoy; Bonaventura Clotet; Cristina Casañ; Cristina Esteban; Francesc Catala-Moll; Gemma Clara; Ignacio Blanco; Marc Noguera-Julian; Maria Casadella; Mariona Parera; Mercedes Guerrero; Montserrat Giménez; Pere-Joan Cardona; Pilar Armengol; Roger Paredes; Verónica Saludes; and Elisa Martró on behalf of the Can Ruti SARS-CoV-2 Sequencing Hub.                                                                                                                                                                                                                                                                                                                                                                                                                                                                                                                                                                                                                                                                                                                                                                                                                                                                                                                                                                                                                                                                                                                                                                                                                                               |
| EPI_ISL_981033                                                                                                                                                                                                                                                | Laboratorio Central Sección Virología. Hospital Regional Artemides Zatti (Viedma, Río Negro); Laboratorio MICROBIOM (General Roca, Río Negro); Hospital Zonal Dr. Ramón Carrillo (San Carlos De Bariloche, Río Negro) | Laboratorio Central Mg. Luis Alfredo Pianiola on behalf of 'Proyecto Argentino Interinstitucional de genómica de SARS-CoV-2' (PAIS Consortium)                        | Antonela De Fino; C Pintos; C Ziehm; Darío Fabián di Prátula; J Ousset; L Pianiola.; Liliana Fonseca; M Fernandez; M Mazzeo; M Nabaes; Marcela Nóbile; María Laura Álvarez; Patricia Valeria Blanco; Silvana Cecchi; Yesica Espasandín                                                                                                                                                                                                                                                                                                                                                                                                                                                                                                                                                                                                                                                                                                                                                                                                                                                                                                                                                                                                                                                                                                                                                                                                                                                                                                                                                                                                 |
| EPI_ISL_2681213                                                                                                                                                                                                                                               | Laboratorio Central de Epidemiología (LCE)                                                                                                                                                                            | Instituto de Biotecnología de la UNAM                                                                                                                                 | ; Alejandra García-Gasca; Alejandra Hernández-Terán; Alejandro Sánchez-Flores; Alfredo Herrera-Estrella; Alicia Ocaña-Mondragón; Andreu Comas-García; Angel Gustavo Salas-Lais; Antonio Loza Román; Bernardo Martínez-Miguel; Blanca Taboada; Brenda Irasema Maldonado-Meza; Bruno Gómez-Gil; Carla Ivón Herrera-Najera; Carlos F. Arias; Celia Boukadia; Clara Esperanza Santacruz-Tinoco; Concepción Grajales-Muñiz; Consorcio Mexicano de Vigilancia Genómica (CoVIGen-Mex). Authors (in alphabetical order): Julio Elias Alvarado-Yah; Cristóbal Cháidez-Quiróz; Célida Duque Molina; Célida Martínez- Rodríguez; Daniel Fregoso-Rueda; Daniel Lira Morales; Eduardo Becerri-Vargas; Fernando Fontove-Herrera; Fidencio Mejía-Nepomuceno; Francisco Pulido; Gloria Elena Espinosa-Ayala; Gloria María Molina-Salinas; Gloria Vazquez; Hector Esteban Paz-Juárez; Hector Montoya-Fuentes; Helen Haydee Fernanda Ramirez-Piasecencia; Irvin González-López; Jean Pierre González; Jesús Hernández; Joel Armando Vázquez-Pérez.; Jorge Salas-Hernández; José Antonio Enciso-Moreno; José Arturo Martínez-Orozco; José Esteban Muñoz-Medina; José de Jesús Nuñez-Contreras; Juan Bautista Chale-Dzul; Julissa Enciso-Ibarra; Luis Alberto Ochoa-Carrera; Margarita Matías-Florentino; Mario Mújica-Sánchez; Marissa Perez-Garcia; María Guadalupe Santiago-Mauricio; María Guadalupe de Jesús Mirales-Rivera; Nely Sélem-Mojica; Pavel Isa; Ricardo Criá Merce; Ricardo Grande; Rosa María Gutiérrez Rios; Santiago Ávila-Rios; Selene Zárate; Susana Lopez; Verónica Mata-Haro; Victor Eduardo García-Arias; Victor Hugo Borja-Aburto |
| EPI_ISL_1492647                                                                                                                                                                                                                                               | Laboratorio Central de Salud Publica de Paraguay                                                                                                                                                                      | Laboratorio Central de Salud Publica de Paraguay                                                                                                                      | Andrea Gómez de la Fuente; Cynthia Vázquez; Flavia Aburjaile; Juan Torales; Luiz Carlos Junior Alcantara; Marta Giovanetti; María José Ortega; María Liz Gamarra; Shirley Villaiba; Talita Adelino; Vagner Fonseca                                                                                                                                                                                                                                                                                                                                                                                                                                                                                                                                                                                                                                                                                                                                                                                                                                                                                                                                                                                                                                                                                                                                                                                                                                                                                                                                                                                                                     |
| EPI_ISL_2660689                                                                                                                                                                                                                                               | Laboratorio Central de Saude Publica do Estado de Sergipe (LACEN/SE)                                                                                                                                                  | Laboratory of Respiratory Viruses and Measles, Oswaldo Cruz Institute, FIOCRUZ                                                                                        | Alice Sampaio Rocha; Ana Carolina Mendonca; Anna Carolina Paixao; Clomar Alves dos Santos; Elisa Cavalcante Pereira; Fernando Motta; Luciana Appolinario; Marilda Siqueira on behalf of the Fiocruz COVID-19 Genomic Surveillance Network; Paola Resende; Renata Serrano Lopes; Tainá Moreira Martins Venas                                                                                                                                                                                                                                                                                                                                                                                                                                                                                                                                                                                                                                                                                                                                                                                                                                                                                                                                                                                                                                                                                                                                                                                                                                                                                                                            |
| EPI_ISL_792541,<br>EPI_ISL_2940267                                                                                                                                                                                                                            | Laboratorio Central, Ministerio de Salud Córdoba                                                                                                                                                                      | Instituto de Patología Vegetal (CIAP-INIA) on behalf of 'Proyecto Argentino Interinstitucional de genómica de SARS-CoV-2' (PAIS Consortium)                           | Barbas, G.; Castro, G.; Debat, H.J.; FD; Fernández; M; M.B.; MB; Marquez, N.; Pisano; Re, R. V.; V                                                                                                                                                                                                                                                                                                                                                                                                                                                                                                                                                                                                                                                                                                                                                                                                                                                                                                                                                                                                                                                                                                                                                                                                                                                                                                                                                                                                                                                                                                                                     |
| EPI_ISL_750163                                                                                                                                                                                                                                                | Laboratorio DILAVE/MGAP-INIA-UdelaR -Tacuarembó                                                                                                                                                                       | Institut Pasteur de Montevideo                                                                                                                                        | Ana Carolina Mendonça; Andrés Lizasoain; Camila Simoes; Cecilia Alonso; Cecilia Salazar; Daiana Mir; Fernando López-Tort; Fernando Motta; Gonzalo Bello; Ighor Arantes; Ignacio Ferrés; Jose Sotelo; Leticia Maya; Leticia Garay Martins; Luciana Appolinario; Lucía Spangenberg; Mailen Arleo; Mariana Brandes; Marilda Mendonça Siqueira; Marilda Tereza Mar da Rosa; María José Benitez-Galeano; Martín Graña; Matías Castells; Matías Victoria; Matías Salvo; Natalia Rego; Natalia Reyes; Pablo Smircich; Paola Cristina Resende; Rodney Colina; Tamara Fernandez-Calero; Tania Possi; Tatiana Schäffer Gregiani; Verónica Noya; Yasser Vega                                                                                                                                                                                                                                                                                                                                                                                                                                                                                                                                                                                                                                                                                                                                                                                                                                                                                                                                                                                      |
| EPI_ISL_1525249,<br>EPI_ISL_1647346,<br>EPI_ISL_1654000,<br>EPI_ISL_1706550,<br>EPI_ISL_1821763,<br>EPI_ISL_2107000                                                                                                                                           | Laboratorio HUB -Azienda Ospedaliero Universitaria - AOU - Cagliari                                                                                                                                                   | Laboratorio SPOKE Biologia Molecolare -Azienda Ospedaliero Universitaria - AOU - Cagliari                                                                             | Alessandra Scano; Ferdinando Coghe; Germano Orrù; Miriam Loddò; Riccardo Cappai; Sara Fais; Valentina Medda                                                                                                                                                                                                                                                                                                                                                                                                                                                                                                                                                                                                                                                                                                                                                                                                                                                                                                                                                                                                                                                                                                                                                                                                                                                                                                                                                                                                                                                                                                                            |
| EPI_ISL_2244910,<br>EPI_ISL_2244911,<br>EPI_ISL_2244912                                                                                                                                                                                                       | Laboratorio HUB -Azienda Ospedaliero Universitaria - AOU - Cagliari, Italy                                                                                                                                            | Department of Infectious Diseases, Istituto Superiore di Sanità                                                                                                       | Alessandra Lo Presti; Angela Di Martino; Ferdinando Coghe; Germano Orrù; Manuela Marra; Marco Crescenzi; Maria Carollo; Paola Stefanelli; Riccardo Cappai; Sara Fais; Stefano Fiore                                                                                                                                                                                                                                                                                                                                                                                                                                                                                                                                                                                                                                                                                                                                                                                                                                                                                                                                                                                                                                                                                                                                                                                                                                                                                                                                                                                                                                                    |
| EPI_ISL_3333121                                                                                                                                                                                                                                               | Laboratorio Nacional de Salud                                                                                                                                                                                         | Asociación de Salud Integral/Clinica Familiar "Luis Ángel García"                                                                                                     | Ana S. Gonzalez-Reiche; Claudia Rangel; Danicela Mercado; Eduardo Arathoon; Hilda Ruiz; Luis Aguirre; Luis Rivas; Narda Medina; Oscar Bonilla; Osmar Gamboa                                                                                                                                                                                                                                                                                                                                                                                                                                                                                                                                                                                                                                                                                                                                                                                                                                                                                                                                                                                                                                                                                                                                                                                                                                                                                                                                                                                                                                                                            |
| EPI_ISL_2825088,<br>EPI_ISL_2825105,<br>EPI_ISL_2827828                                                                                                                                                                                                       | Laboratorio Nacional de Salud                                                                                                                                                                                         | Laboratorio Nacional de Salud                                                                                                                                         | Gabriela García; Linda Mendoza                                                                                                                                                                                                                                                                                                                                                                                                                                                                                                                                                                                                                                                                                                                                                                                                                                                                                                                                                                                                                                                                                                                                                                                                                                                                                                                                                                                                                                                                                                                                                                                                         |

|                                                                                     |                                                                                                                                                                     |                                                                                                                                                                                                                                                                                                                                                                          |                                                                                                                                                                                                                                                                                                                                                                                                                                                            |                                                                                                                                                                                                                                                                                                        |
|-------------------------------------------------------------------------------------|---------------------------------------------------------------------------------------------------------------------------------------------------------------------|--------------------------------------------------------------------------------------------------------------------------------------------------------------------------------------------------------------------------------------------------------------------------------------------------------------------------------------------------------------------------|------------------------------------------------------------------------------------------------------------------------------------------------------------------------------------------------------------------------------------------------------------------------------------------------------------------------------------------------------------------------------------------------------------------------------------------------------------|--------------------------------------------------------------------------------------------------------------------------------------------------------------------------------------------------------------------------------------------------------------------------------------------------------|
| EPI_ISL_837589, EPI_ISL_837595                                                      | Laboratorio Nacional de Salud                                                                                                                                       | Laboratory of Respiratory Viruses and Measles, Oswaldo Cruz Institute, FIOCRUZ                                                                                                                                                                                                                                                                                           | Ana Carolina Mendonca; Anna Carolina Paixao; Cesar Roberto Conde Pereira; Claudia Estrada; Fernando Motta; Luciana Appolinario; Marilda Siqueira on behalf of the Fiocruz COVID-19 Genomic Surveillance Network; Paola Resende                                                                                                                                                                                                                             |                                                                                                                                                                                                                                                                                                        |
| EPI_ISL_3045410                                                                     | Laboratorio Nacional de Salud Pública Dr. Defilló - LNSPDD                                                                                                          | Laboratory of Respiratory Viruses and Measles, Oswaldo Cruz Institute, FIOCRUZ                                                                                                                                                                                                                                                                                           | Alice Sampaio Rocha; Ana Carolina Mendonca; Anna Carolina Paixao; Elisa Cavalcante Pereira; Fernando Motta; Grey Benoit Vasquez; Isaac Miguel Sanchez; Ivonne Imbert; Lucía de la Cruz; Luciana Appolinario; Marilda Siqueira on behalf of the Fiocruz COVID-19 Genomic Surveillance Network; Nury de Castro; Paola Resende; Renata Serrano Lopes; Ronald Skewes; Taina Venas                                                                              |                                                                                                                                                                                                                                                                                                        |
| EPI_ISL_3275179, see above                                                          | EPI_ISL_3275192, EPI_ISL_3275198, EPI_ISL_3275200, EPI_ISL_3275218, EPI_ISL_3275234, EPI_ISL_3275248                                                                | Laboratorio Nacional de Salud, Ministerio de Salud Pública y Asistencia Social                                                                                                                                                                                                                                                                                           | Genomics and Proteomics Department, Gorgas Memorial Institute For Health Studies                                                                                                                                                                                                                                                                                                                                                                           | Alexander A Martinez; Ambar Moreno; Claudia Estrada; Claudia Gonzalez V; César Roberto Conde Pereira; Jessica Gondola; Leyda Abrego; Marlene Castillo; Oris Chavarria                                                                                                                                  |
| EPI_ISL_2648258, EPI_ISL_2650524, EPI_ISL_2650533                                   | Laboratorio Nacional de Vigilancia de la Salud - Sección de Virología                                                                                               | Genomics and Proteomics Department, Gorgas Memorial Institute For Health Studies                                                                                                                                                                                                                                                                                         | Alexander Martinez; Ambar Moreno; Claudia Díaz; Claudia Gonzalez; Elda Martínez; Jessica Gondola; Leyda Abrego; Marlene Castillo; Mitzi Castro; Oris Chavarria; Sandra Paola Paz; Sofia Carolina Alvarado                                                                                                                                                                                                                                                  |                                                                                                                                                                                                                                                                                                        |
| EPI_ISL_1789698                                                                     | Laboratorio PGM                                                                                                                                                     | Laboratorio de Infectología Molecular, Departamento de Bioquímica y Medicina Molecular, Facultad de Medicina - Universidad Autónoma de Nuevo León                                                                                                                                                                                                                        | Ana M. Rivas-Estilla; Daniel Arellano-Soto; Eduardo Garza-de-la-Peña; Gabriela Elizondo; Javier Ramos-Jimenez; Kame A. Galán-Huerta; María F. Herrera-Saldivar; Natalia Martínez-Acuña; Sonia A. Lozano-Sepúlveda                                                                                                                                                                                                                                          |                                                                                                                                                                                                                                                                                                        |
| EPI_ISL_2462063                                                                     | Laboratorio de Biología Molecular, Hospital San Pedro Claver                                                                                                        | Microbiología Molecular, Instituto SELADIS, Universidad Mayor de San Andrés                                                                                                                                                                                                                                                                                              | Aneth Vasquez Michel; Carmen Delgado Barrera; Oscar M. Rollano-Peñaloza; Sandra Miranda Sardon                                                                                                                                                                                                                                                                                                                                                             |                                                                                                                                                                                                                                                                                                        |
| EPI_ISL_2600378                                                                     | Laboratorio de Biología Molecular, Hospital San Pedro Claver                                                                                                        | Molecular Genetics Laboratory, Instituto de Investigaciones Químicas, Universidad Mayor de San Andrés                                                                                                                                                                                                                                                                    | Aneth Vasquez Michel; Carmen Delgado Barrera; Oscar M. Rollano-Peñaloza; Sandra Miranda Sardon                                                                                                                                                                                                                                                                                                                                                             |                                                                                                                                                                                                                                                                                                        |
| EPI_ISL_2427736, EPI_ISL_2427766                                                    | Laboratorio de Biología Molecular Médica Uruguaya                                                                                                                   | Departments of Pathology and Medicine, New York University School of Medicine                                                                                                                                                                                                                                                                                            | Adriana Heguy; Cecilia Sorhouet; Christian Marier; Dacia Dimartino; Gonzalo Manrique; Maria Cristina Mogdasy; Maria Noel Zubillaga; Maria Victoria Elizondo; Paul Zappile                                                                                                                                                                                                                                                                                  |                                                                                                                                                                                                                                                                                                        |
| EPI_ISL_953404, EPI_ISL_953408, EPI_ISL_953420, EPI_ISL_953425                      | Laboratorio de Investigaciones de Baney                                                                                                                             | "Swiss Tropical and Public Health Institute"                                                                                                                                                                                                                                                                                                                             | "Carlos Cortes; Bonifacio Manguire Nlavo; Claudia Daubenberger; Diosdado Odjama Nseng Ada; Elizabeth Nyakarungu; Guillermo Garcia; Maximilian Mpina; Mitoha Ondo O Ayekaba; Philip Wonder Phiri"; Salome Hosch; Tobias Schindler                                                                                                                                                                                                                           |                                                                                                                                                                                                                                                                                                        |
| EPI_ISL_1700675, EPI_ISL_1700679, EPI_ISL_2002671                                   | Laboratorio de Investigaciones de Baney                                                                                                                             | Swiss Tropical and Public Health Institute                                                                                                                                                                                                                                                                                                                               | Bonifacio Manguire Nlavo; Carlos Cortes; Claudia Daubenberger; Diosdado Odjama Nseng Ada; Elizabeth Nyakarungu; Guillermo Garcia; Maximilian Mpina; Mitoha Ondo O Ayekaba; Philip Wonder Phiri; Philipp Wagner; Salome Hosch; Tobias Schindler; Yahya Maidane                                                                                                                                                                                              |                                                                                                                                                                                                                                                                                                        |
| EPI_ISL_648311, see above                                                           | EPI_ISL_648326, EPI_ISL_648336, EPI_ISL_648339, EPI_ISL_648367, EPI_ISL_648374, EPI_ISL_648378                                                                      | Laboratorio de Investigaciones de Baney                                                                                                                                                                                                                                                                                                                                  | University Hospital Basel, Clinical Bacteriology                                                                                                                                                                                                                                                                                                                                                                                                           | Adrian Egli; Alfredo Mari; Bonifacio Manguire Nlavo; Carlos Cortes; Claudia Daubenberger; Diosdado Odjama Nseng Ada; Elizabeth Nyakarungu; Guillermo Garcia; Helena Seth-Smith; Madlen Stange; Maximilian Mpina; Mitoha Ondo O Ayekaba; Phiip Wonder Phiri; Salome Hosch; Tim Roloff; Tobias Schindler |
| EPI_ISL_1092325, EPI_ISL_1137488, EPI_ISL_1532225                                   | Laboratorio de Referencia Nacional de Virus Respiratorio, Instituto Nacional de Salud Perú                                                                          | Laboratorio de Referencia Nacional de Biotecnología y Biología Molecular, Instituto Nacional de Salud Perú                                                                                                                                                                                                                                                               | Carlos Padilla Rojas; Henri Bailon Calderon; Johanna Balbuena Torrez; Karolyn Vega Chozo; Luis Barcena; Marco Galarza Perez; Maribel Huaranga Nuñez; Nancy Rojas Serrano; Omar Caceres Rey; Priscila Lope Pari                                                                                                                                                                                                                                             |                                                                                                                                                                                                                                                                                                        |
| EPI_ISL_1111112, EPI_ISL_1111114, EPI_ISL_1111223, EPI_ISL_1111249, EPI_ISL_1111266 | Laboratorio de Referencia Nacional de Virus Respiratorio, Instituto Nacional de Salud Perú                                                                          | Laboratorio de Referencia Nacional de Enteropatógenos, Instituto Nacional de Salud del Perú                                                                                                                                                                                                                                                                              | Fiorella Orellana Peralta; Iris Silva Molina; Junior Caro Castro; Ronnie Gavilan Chavez; Veronica Hurtado Vela; Willi Quino Sifuentes                                                                                                                                                                                                                                                                                                                      |                                                                                                                                                                                                                                                                                                        |
| EPI_ISL_540959                                                                      | Laboratorio de Referencia Nacional de Virus Respiratorios, Instituto Nacional de Salud Peru                                                                         | Laboratorio de Genómica Microbiana, Universidad Peruana Cayetano Heredia                                                                                                                                                                                                                                                                                                 | Alejandra Dávila-Barclay; Brenda Ayzano; Camila Castillo-Vilcahuaman; Guillermo Salvatierra; Janet Huanchaquoche; Luis González; Maribel Huaranga; Pablo Tsukayama; Pedro E. Romero; Pool Marcos                                                                                                                                                                                                                                                           |                                                                                                                                                                                                                                                                                                        |
| EPI_ISL_3401456                                                                     | Laboratorio de Referencia Nacional de Virus Respiratorios, Centro Nacional de Salud Pública, Instituto Nacional de Salud Peru.                                      | Laboratorio de Referencia Nacional de Virus Respiratorios, Centro Nacional de Salud Pública, Instituto Nacional de Salud Peru.                                                                                                                                                                                                                                           | Carlos Padilla Rojas; Henri Bailon Calderon; Iris Silva Molina; Joseph Huayra Niquen; Lely Solari Zepa; Luis Barcena Flores; Marco Galarza Perez; Nancy Rojas Serrano; Nieves Sevilla Castañeda; Omar Caceres Rey; Orson Mestanza Millones; Princesa Medrano Alhuay; Priscila Lope Pari; Sandra Morales Ruiz; Sara Gordillo Vilchez; Steve Acedo Lazo; Veronica Hurtado Vela; Victor Jimenez Vasquez; Wendy Lizarraga Olivares                             |                                                                                                                                                                                                                                                                                                        |
| EPI_ISL_2536804, EPI_ISL_2921475, EPI_ISL_3376410                                   | Laboratorio de Referencial Nacional de Virus Respiratorios                                                                                                          | Laboratorio de Referencial Nacional de Virus Respiratorios                                                                                                                                                                                                                                                                                                               | Carlos Padilla Rojas; Henri Bailon Calderon; Iris Silva Molina; Joseph Huayra Niquen; Lely Solari Zepa; Luis Barcena Flores; Marco Galarza Perez; Nancy Rojas Serrano; Omar Caceres Rey; Orson Mestanza Millones; Priscila Lope Pari; Sandra Morales Ruiz; Steve Acedo Lazo; Veronica Hurtado Vela                                                                                                                                                         |                                                                                                                                                                                                                                                                                                        |
| EPI_ISL_3275292, EPI_ISL_3275295                                                    | Laboratorio de Vigilancia en Salud Pública el Salvador                                                                                                              | Genomics and Proteomics Department, Gorgas Memorial Institute For Health Studies                                                                                                                                                                                                                                                                                         | Alexander Martinez; Ambar Moreno; Claudia Díaz; Claudia Gonzalez; Denis G Jovel A; Gustavo M Ramirez; Jessica Gondola; Leyda Abrego; Marlene Castillo; Oris Chavarria; Ruth C Vasquez C; Sandra Paola Paz                                                                                                                                                                                                                                                  |                                                                                                                                                                                                                                                                                                        |
| EPI_ISL_1396198                                                                     | Laboratorio de Virología del Hospital de Niños Dr. Ricardo Gutierrez                                                                                                | Área de Secuenciación del Laboratorio de Virología del Hospital de Niños Dr. Ricardo Gutierrez on behalf of 'Proyecto Argentino Interinstitucional de genómica de SARS-CoV-2' (PAIS Consortium)                                                                                                                                                                          | A; Acevedo; Acuña; Alexay; Alvarez Lopez; Barreda Frank; C; D; E; G; Goya; Grandis; Jacques; LE; Labarta; Lusso; M; ME; MI; Medina; Mistchenko; N; Nabaes Jodar; Natale; O; S; Streitenberger; Thomas; Valinotto; Viegas, M.; Villegas                                                                                                                                                                                                                     |                                                                                                                                                                                                                                                                                                        |
| EPI_ISL_1662550                                                                     | Laboratorio di Microbiologia                                                                                                                                        | Laboratorio di Microbiologia                                                                                                                                                                                                                                                                                                                                             | Martinetti Lucchini Gladys; Valeria Spina                                                                                                                                                                                                                                                                                                                                                                                                                  |                                                                                                                                                                                                                                                                                                        |
| EPI_ISL_754910                                                                      | Laboratory Diagnostics and Clinical Immunology of Developmental Age, Medical University of Warsaw                                                                   | genXone SA, Research & Development Laboratory, The Faculty of Mathematics, Informatics and Mechanics of the University of Warsaw                                                                                                                                                                                                                                         | Anna Gambin; Grzegorz Nowicki; Jakub Grabowski; Maciej Sykulski; Michal Kaszuba; Monika Mańkowska-Woźniak; Natalia Drwęska-Matejska; Urszula Demkow; Lukasz Krych                                                                                                                                                                                                                                                                                          |                                                                                                                                                                                                                                                                                                        |
| EPI_ISL_956331                                                                      | Laboratory Medicine                                                                                                                                                 | Department of Laboratory Medicine, Lin-Kou Chang Gung Memorial Hospital, Taoyuan, Taiwan                                                                                                                                                                                                                                                                                 | Cheng-Hsun Chiu; Cheng-Ta Yang; Chung-Guei Huang; Guang-Wu Chen; Kuo-Chien Tsao; Kuo-Ming Lee; Mei-Jen Hsiao; Peng-Nien Huang; Po-Wei Huang; Shin-Ru Shih; Shu-Li Yang; Yi-Chun Liu; Yu-Nong Gong                                                                                                                                                                                                                                                          |                                                                                                                                                                                                                                                                                                        |
| EPI_ISL_2467938                                                                     | Laboratory for HIV and opportunistic infections diagnosis The Republican Research and Practical Center for Epidemiology and Microbiology (RRPCEM)                   | Laboratory for HIV and opportunistic infections diagnosis The Republican Research and Practical Center for Epidemiology and Microbiology (RRPCEM)                                                                                                                                                                                                                        | Alina Drozd; Artur Akhremchuk; Elena Gasich; Hanna Gudel; Katsiaryna Belyakova; Kirill Bulda; Leonid Valentovich; Nastassia Kabankova                                                                                                                                                                                                                                                                                                                      |                                                                                                                                                                                                                                                                                                        |
| EPI_ISL_1138899                                                                     | Laboratory for HIV and opportunistic infections diagnosis The Republican Research and Practical Center for Epidemiology and Microbiology (RRPCEM)                   | Laboratory for HIV and opportunistic infections diagnosis The Republican Research and Practical Center for Epidemiology and Microbiology (RRPCEM)                                                                                                                                                                                                                        | Anatoly Krasko; Artur Akhremchuk; Elena Gasich; Kirill Bulda; Leonid Valentovich; Vladimir Gorbunov                                                                                                                                                                                                                                                                                                                                                        |                                                                                                                                                                                                                                                                                                        |
| EPI_ISL_2233677, EPI_ISL_2233685                                                    | Laboratory of Clinical Virology                                                                                                                                     | Greek Genome Center, Biomedical Research Foundation of the Academy of Athens (BRFAA)                                                                                                                                                                                                                                                                                     | Dimitrios Thanos; Emmanouil Athanasiadis; George Sourvinos; Giannis Vatsellas; Katerina Zoi; Theodoros Loupis                                                                                                                                                                                                                                                                                                                                              |                                                                                                                                                                                                                                                                                                        |
| EPI_ISL_1138532                                                                     | Laboratory of Communicable Diseases                                                                                                                                 | 1. Laboratory of Communicable Diseases (Estonia); 2. Eurofins Genomics Europe Sequencing GmbH                                                                                                                                                                                                                                                                            | Liidia Dotsenko                                                                                                                                                                                                                                                                                                                                                                                                                                            |                                                                                                                                                                                                                                                                                                        |
| EPI_ISL_735392                                                                      | Laboratory of Genetics and Personalized Medicine, Zan Mitrev Clinic                                                                                                 | Laboratory of Genetics and Personalized Medicine, Zan Mitrev Clinic                                                                                                                                                                                                                                                                                                      | 2020; Kungulovski et al.                                                                                                                                                                                                                                                                                                                                                                                                                                   |                                                                                                                                                                                                                                                                                                        |
| EPI_ISL_2301696, EPI_ISL_2301733                                                    | Laboratory of Immunohematology, Division of Hematology                                                                                                              | Greek Genome Center, Biomedical Research Foundation of the Academy of Athens (BRFAA)                                                                                                                                                                                                                                                                                     | Athanasia Mouzaki; Dimitrios Thanos; Emmanouil Athanasiadis; Giannis Vatsellas; Katerina Zoi; Theodoros Loupis                                                                                                                                                                                                                                                                                                                                             |                                                                                                                                                                                                                                                                                                        |
| EPI_ISL_434466                                                                      | Laboratory of Microbiology, Medical School, National and Kapodistrian University of Athens                                                                          | Laboratory of Biology, Department of Medicine, Democritus University of Thrace                                                                                                                                                                                                                                                                                           | Bampali, M.; Dovrolis, N.; Froukala, E.; Gatzidou, E.; Kassela K.; N. and Karakasiotlis, I.; Spanakis; Stavropoulou, A.; Tsakris, A.; Veletza, S.                                                                                                                                                                                                                                                                                                          |                                                                                                                                                                                                                                                                                                        |
| EPI_ISL_2896981                                                                     | Laboratory of Microbiology, National Reference Lab, Charles Nicolle Hospital; 2-University of Tunis ElManar, Faculty of Medicine of Tunis, LR99E509, Tunis, Tunisia | 1-Clinical and Experimental Pharmacology Lab, LR165P02, National Center of Pharmacovigilance, University of Tunis El Manar, Tunis, Tunisia. 2-Neurodegenerative diseases and psychiatric troubles, LR185P03, Razi Hospital, University of Tunis El Manar, Tunis, Tunisia. 3- Ministry of Health, National Observatory of New and Emerging Diseases, 1006, Tunis, Tunisia | Alia Benkahla; Emna Gaies; Ilhem Boutiba-Ben Boubaker.; Imen Kacem; Imen Mkada; Ines Mdini; Jalila Ben Khelil; Maher Kharrat; Mouna Ben Sassi; Mouna Safer; Nissaf Ben Alaya; Riadh Daghfous; Riadh Gouider; Roua Ben Othman; Salma Abid; Sameh Trabelsi; Sana Ferjani; Sarra Chamman                                                                                                                                                                      |                                                                                                                                                                                                                                                                                                        |
| EPI_ISL_803120, EPI_ISL_2153433, EPI_ISL_2154331                                    | Laboratory of Microbiology, National Reference Lab, Charles Nicolle Hospital; 2-University of Tunis ElManar, Faculty of Medicine of Tunis, LR99E509, Tunis, Tunisia | Clinical and Experimental Pharmacology Lab, LR165P02, National Center of Pharmacovigilance, University of Tunis El Manar, Tunis, Tunisia. 2-Neurodegenerative diseases and psychiatric troubles, LR185P03, Razi Hospital, University of Tunis El Manar, Tunis, Tunisia. 3- Ministry of Health, National Observatory of New and Emerging Diseases, 1006, Tunis, Tunisia   | Ahmed Fakhfakh; Alia BenKahla; Gaies Emna; Habiba Ben Romdhane; Hanen El Jebari; Ilhem Boutiba-Ben Boubaker.; Ilhem Boutiba-Ben Boubaker.; Imen Kacem; Imen Mdini; Jalila Ben Khelil; Maher Kharrat; Manel Ben Sassi; Mouna Ben Sassi; Mouna Safer; Nissaf Ben Alaya; Raja Mahfoudh; Riadh Daghfous; Riadh Gouider; Riadh Gouider.; Roua Ben Othman; Salma Abid; Sameh Trabelsi; Sana Ferjani; Sarra Chamman; Souissi Amira; Taha Maatoug; Zaineb Hamzaoui |                                                                                                                                                                                                                                                                                                        |



|                                                                                                                 |                                                                                                                                                                                                                             |                                                                                              |                                                                                                                                                                                                                                                                                                                                                                                                                                                                                                          |
|-----------------------------------------------------------------------------------------------------------------|-----------------------------------------------------------------------------------------------------------------------------------------------------------------------------------------------------------------------------|----------------------------------------------------------------------------------------------|----------------------------------------------------------------------------------------------------------------------------------------------------------------------------------------------------------------------------------------------------------------------------------------------------------------------------------------------------------------------------------------------------------------------------------------------------------------------------------------------------------|
| EPI_ISL_3343854,<br>EPI_ISL_3343967,<br>EPI_ISL_3344066                                                         | Laboratory of Molecular Biology and Cancer Immunology                                                                                                                                                                       | Quadram Institute Bioscience                                                                 | Abdul K. Sessay; Alexander J. Trotter; Andrew J. Page; Bassam Badran; Georgi Merhi; Hala Abou Naja; Hamad Hasan; Jad Koweys; Janine M. Wilkinson; Kate A. Makin; Leonardo de Oliveira Martins; Mark Pallen; Mark Webber; Martin Lott; Matthew W. Felgate; Mona Al Buaini; Nabil-Fareed Alikhan; Nada Ghosni; Orla J. Jupp; Rachael Stanley; Rose K. Davidson; Sarah Gardener; Sima Tokajik; Sophie J. Prosekol; Tatiana Tohmet; Thanh Le-Viet                                                            |
| EPI_ISL_876028                                                                                                  | Laboratory of Molecular Biology, Diagnostyka sp. z o.o.                                                                                                                                                                     | genXone SA, Research & Development Laboratory                                                | Grzegorz Nowicki; Jakub Grabowski; Maciej Sykulski; Michal Kaszuba; Monika Mańkowska-Woźniak; Natalia Drwęska-Matelska; Lukasz Krych                                                                                                                                                                                                                                                                                                                                                                     |
| EPI_ISL_801607                                                                                                  | Laboratory of Molecular Virology, Pontificia Universidad Católica de Chile                                                                                                                                                  | MSSH Pathogen Surveillance Program                                                           | Adolfo Garcia-Sastre; Adriana van De Guchte; Ajay Obla; Ana Maria Contreras; Ana S. Gonzalez-Reiche; Bremy Albuquerque; Carlos Palma; Constanza Maldonado; Edward C. Holmes; Eileen Serrano; Erick Salinas; Hala Alshammary; Harm van Bakel; Jayeeta Dutta; Jorge Levican; Juan Soto; Leonardo I. Almonacid; M. BeLEN Leyton; Marcela Ferrer; Matthew M. Hernandez; Melissa Smith; Rafael A. Medina.; Robert Sebra; Shwetha Hara Sridhar; Tamara Garcia-Salun; Viviana Simon; Ying-Chih Wang; Zenab Khan |
| EPI_ISL_984651                                                                                                  | Laboratory of Virology of Federal Budget Health Care Institution Center of Hygiene and Epidemiology in Arkhangelsk region                                                                                                   | Group of Genomics and Postgenomic Technologies of Central Research Institute of Epidemiology | Akimkin VG; Bulanenko VP; Kaptelova VV; Kondrasheva LV; Korneenko EV; Ponomareva YA; Saenko SS; SamoiloV AE; Semyina LV; Shishko LA; Speranskaya AS; Tivanova EV; Valdokhina AV                                                                                                                                                                                                                                                                                                                          |
| EPI_ISL_1341503                                                                                                 | Laboratory of Virology, National center of expertise                                                                                                                                                                        | RSE "National Center of Expertise" and RSE "National center for Biotechnology"               | Abdaliyev Askar; Amirgazin Asylulan; Balykbaev Kanat; Kamalova Dinara; Ramankulov Erlan; Sharipova Saule; Shevtsov Alexandr; Tungshbayev Talgat                                                                                                                                                                                                                                                                                                                                                          |
| EPI_ISL_1191740                                                                                                 | Laboratory of virology and molecular diagnostics                                                                                                                                                                            | Laboratory of virology and molecular diagnostics                                             | Boshevska Golubinka; Janchevska Elizabeta; Kuzmanovska Maja                                                                                                                                                                                                                                                                                                                                                                                                                                              |
| EPI_ISL_1669992,<br>EPI_ISL_2392161,<br>EPI_ISL_2987557,<br>EPI_ISL_2987571                                     | Laboratory of virology and molecular diagnostics, Institute of Public Health                                                                                                                                                | Laboratory of virology and molecular diagnostics, Institute of Public Health                 | Boshevska G; Janchevska E.; Kuzmanovska M                                                                                                                                                                                                                                                                                                                                                                                                                                                                |
| EPI_ISL_1448018                                                                                                 | Laboratory of virology, National center of expertise                                                                                                                                                                        | RSE "National Center for Biotechnology" and RSE "National Center of Expertise"               | Abdaliyev Askar; Amirgazin Asylulan; Balykbaev Kanat; Kamalova Dinara; Ramankulov Yerlan; Sharipova Saule; Shevtsov Alexandr; Tungshbayev Talgat                                                                                                                                                                                                                                                                                                                                                         |
| EPI_ISL_2150989,<br>EPI_ISL_2158599                                                                             | Laboratório de Biologia Molecular Jean Piaget                                                                                                                                                                               | MRCG at LSHTM, Genomics lab                                                                  | Abdoulie Kante; Abdul Karim Sessay; Adul Candé; Aicha Balde; Aladje Balde; Bakary Sanyang; Bubacar Delgado Pinto Embalá; Dabiri Damilari; Edmira Maria da Costa; Erica Luis Maria Magalhães; Faatu Cassama; Mariama Kujabi; Milanca Agostinho Cá; Paulina Joãozinho da Costa Jarra Manneh; Rei José Pereira; Rui Inndi; Sainabou Laye Ndure; Simão Tchuda Bíté                                                                                                                                           |
| EPI_ISL_1152514                                                                                                 | Labormedizin Darmstadt                                                                                                                                                                                                      | Robert Koch Institute                                                                        |                                                                                                                                                                                                                                                                                                                                                                                                                                                                                                          |
| EPI_ISL_1973556,<br>see above                                                                                   | EPI_ISL_2484343, EPI_ISL_2484440, EPI_ISL_2484541, EPI_ISL_2484554, EPI_ISL_2484555, EPI_ISL_2484579, EPI_ISL_2484580, EPI_ISL_2484581, EPI_ISL_2484583, EPI_ISL_2484607, EPI_ISL_2768045, EPI_ISL_3344073                  | Clinical Bacteriology                                                                        | Adrian Egli; Alfredo Mari; Fanny Wegner; Hans Hirsch; Helena MB Seth-Smith; Julia Bielicki; Karoline Leuzinger; Lorenz Risch; Madlen Stange; Manuel Battegay; Martin Risch; Nadia Wohlwend; Tim Roloff                                                                                                                                                                                                                                                                                                   |
| EPI_ISL_660136                                                                                                  | Lancet                                                                                                                                                                                                                      | National Health Laboratory Service (NHS), Tygerberg                                          | Bronwyn Kleinhans; Davis M-A; Draper C; Eduan Wilkinton; Gert van Zyl; Houriyah Tegally; Hsiao M; Kayla Delaney; Siegfried N; Susan Engelbrecht; Tulio de Oliveira; Williamson C; Wolfgang Preiser                                                                                                                                                                                                                                                                                                       |
| EPI_ISL_3074056                                                                                                 | Lancet Laboratory                                                                                                                                                                                                           | National Institute for Communicable Diseases of the National Health Laboratory Service       | Amoako DG; Bhiman JN; Everatt J; Ismail A; Mahlangu B; Mnguni A; Mohale T; Ntuli N; Scheepers C                                                                                                                                                                                                                                                                                                                                                                                                          |
| EPI_ISL_738321,<br>EPI_ISL_738323                                                                               | Landstuhl Regional Medical Center                                                                                                                                                                                           | United States Air Force School of Aerospace Medicine                                         | Amanda Javorina; Anthony Fries; Clarise Starr; Cole Anderson; Elizabeth Macias; Fritz Castillo; Jennifer Meyer; Sarah Purves; William Gruner                                                                                                                                                                                                                                                                                                                                                             |
| EPI_ISL_2779489,<br>EPI_ISL_2779490                                                                             | Lanet hospital                                                                                                                                                                                                              | USAMRD-A, Basic Science Laboratory                                                           | Alan Lemtudo; Beth Mutai; Brian Andika; Carol Kifude; Clement Masakwe; Eric Muthanje; Esther Omuseni; Faith Sigei; Gathii Kimita; George Awinda; John Waitumbi; Josphat Nyataya; Rachel Githii; Rehema Liyai; Stephen Ochola                                                                                                                                                                                                                                                                             |
| EPI_ISL_2443545,<br>EPI_ISL_2863898                                                                             | Laboratório Central de Saude Publica do Estado do Parana (LACEN/PR)                                                                                                                                                         | Laboratory of Respiratory Viruses and Measles, Oswaldo Cruz Institute, FIOCRUZ               | Agatha Cristinne Prudencio Soares; Alice Sampaio Rocha; Ana Carolina Mendonca; Anna Carolina Paixao; Elisa Cavalcante Pereira; Fernando Motta; Ighor Leonardo Arantes Gomes; Irina Riediger; Luciana Appolinario; Marilda Siqueira on behalf of the Fiocruz COVID-19 Genomic Surveillance Network; Paola Resende; Renata Serrano Lopes; Taina Venas                                                                                                                                                      |
| EPI_ISL_2138822,<br>EPI_ISL_2138848                                                                             | Life Sciences Center, Vilnius University                                                                                                                                                                                    | Institute of Biotechnology, Life Sciences Center, Vilnius University                         | Albertas Timinskas; Alma Gedvilaite; Danguole Ziogiene; Emilija Vasiliunaite; Milda Norkiene                                                                                                                                                                                                                                                                                                                                                                                                             |
| EPI_ISL_1018852,<br>see above                                                                                   | EPI_ISL_1244963, EPI_ISL_1246214, EPI_ISL_1275591, EPI_ISL_1333887, EPI_ISL_1374137, EPI_ISL_1410265, EPI_ISL_1451288, EPI_ISL_1451346, EPI_ISL_1473594, EPI_ISL_1473658, EPI_ISL_1483822, EPI_ISL_1831400, EPI_ISL_1831515 | Wellcome Sanger Institute for the COVID-19 Genomics UK (COG-UK) Consortium                   | Cordelia Langford; David K. Jackson; Dominic Kwiatkowski; Ewan Harrison; Ian Johnston; Jeffrey Barrett; John Sillitoe on behalf of the Wellcome Sanger Institute COVID-19 Surveillance Team; Rob Howes; Roberto Amato; Sonia Goncalves; The Lighthouse Lab in Cambridge and Alex Alderton                                                                                                                                                                                                                |
| EPI_ISL_1173975,<br>EPI_ISL_1333084,<br>EPI_ISL_1673188,<br>EPI_ISL_1698571,<br>EPI_ISL_1698756                 | Lighthouse Lab in Glasgow                                                                                                                                                                                                   | Wellcome Sanger Institute for the COVID-19 Genomics UK (COG-UK) Consortium                   | Anna Dominiczak and Alex Alderton; Carol Clugston; Cordelia Langford; David Gray; David K. Jackson; Dominic Kwiatkowski; Ewan Harrison; Harper VanSteenhouse; Ian Johnston; Jeffrey Barrett; John Sillitoe on behalf of the Wellcome Sanger Institute COVID-19 Surveillance Team; Roberto Amato; Sonia Goncalves; Yumi Kasai                                                                                                                                                                             |
| EPI_ISL_530530,<br>EPI_ISL_533385                                                                               | Lighthouse Lab in Glasgow                                                                                                                                                                                                   | Wellcome Sanger Institute for the COVID-19 Genomics UK (COG-UK) consortium                   | Anna Dominiczak and Alex Alderton; Carol Clugston; Cordelia Langford; David Gray; David K. Jackson; Dominic Kwiatkowski; Ewan Harrison; Harper VanSteenhouse; Ian Johnston; John Sillitoe; Roberto Amato; Sonia Goncalves; Yumi Kasai                                                                                                                                                                                                                                                                    |
| EPI_ISL_1790998,<br>EPI_ISL_2317665,<br>EPI_ISL_2435364                                                         | Lighthouse Lab in Milton Keynes                                                                                                                                                                                             | Wellcome Sanger Institute for the COVID-19 Genomics UK (COG-UK) Consortium                   | Cordelia Langford; David K. Jackson; Dominic Kwiatkowski; Ewan Harrison; Ian Johnston; Jeffrey Barrett; John Sillitoe on behalf of the Wellcome Sanger Institute COVID-19 Surveillance Team; Roberto Amato; Sonia Goncalves; The Lighthouse Lab in Milton Keynes and Alex Alderton                                                                                                                                                                                                                       |
| EPI_ISL_2129363                                                                                                 | Limbach - MVZ Humangenetik Ulm                                                                                                                                                                                              | Robert Koch Institute                                                                        |                                                                                                                                                                                                                                                                                                                                                                                                                                                                                                          |
| EPI_ISL_568978,<br>EPI_ISL_804502,<br>EPI_ISL_900119,<br>EPI_ISL_900181,<br>EPI_ISL_1201045,<br>EPI_ISL_1201046 | MEPHI, Aix Marseille University                                                                                                                                                                                             | MEPHI, Aix Marseille University                                                              | Anthony LEVASSEUR                                                                                                                                                                                                                                                                                                                                                                                                                                                                                        |
| EPI_ISL_2895751                                                                                                 | MIDDELBURG LABORATORY                                                                                                                                                                                                       | National Institute for Communicable Diseases of the National Health Laboratory Service       | Amoako DG; Bhiman JN; Everatt J; Ismail A; Mahlangu B; Mnguni A; Mohale T; Ntuli N; Scheepers C                                                                                                                                                                                                                                                                                                                                                                                                          |
| EPI_ISL_2556117,<br>EPI_ISL_2557251                                                                             | MOH - Jaber Al-Ahmad Hospital (Innovation Research Laboratory)                                                                                                                                                              | MOH - Jaber Al-Ahmad Hospital (Innovation Research Laboratory)                               | Mohammad Alghounaim; Salman Al-Sabah                                                                                                                                                                                                                                                                                                                                                                                                                                                                     |
| EPI_ISL_2779443                                                                                                 | MOH-K                                                                                                                                                                                                                       | USAMRD-A, Basic Science Laboratory                                                           | Alan Lemtudo; Beth Mutai; Brian Andika; Carol Kifude; Clement Masakwe; Eric Muthanje; Esther Omuseni; Faith Sigei; Gathii Kimita; George Awinda; John Waitumbi; Josphat Nyataya; Rachel Githii; Rehema Liyai; Stephen Ochola                                                                                                                                                                                                                                                                             |
| EPI_ISL_2346387,<br>see above                                                                                   | EPI_ISL_2346419, EPI_ISL_2346425, EPI_ISL_2346426, EPI_ISL_2346428, EPI_ISL_2346429, EPI_ISL_2346432, EPI_ISL_2346433, EPI_ISL_2346434, EPI_ISL_2346435                                                                     | MRC/UVRI & LSHTM Uganda Research Unit, Central Public Health Laboratories                    | Dan Lule Bugembe; Isaac Sseeewanyana; Matthew Cotten; My V.T. Phan; Patrick Semanda; Pontiano Kaleebu; Susan Nabadda                                                                                                                                                                                                                                                                                                                                                                                     |
| EPI_ISL_1970565,<br>EPI_ISL_1970566,<br>EPI_ISL_1970567,<br>EPI_ISL_1970568                                     | MRC/UVRI & LSHTM Uganda Research Unit                                                                                                                                                                                       | MRC/UVRI & LSHTM Uganda Research Unit                                                        | Dan Lule Bugembe; Isaac Sseeewanyana; Matthew Cotten; My V.T. Phan; Patrick Semanda; Pontiano Kaleebu; Susan Nabadda                                                                                                                                                                                                                                                                                                                                                                                     |
| EPI_ISL_1469325,<br>EPI_ISL_1469327,<br>EPI_ISL_1469416                                                         | MRC/UVRI & LSHTM Uganda Research Unit                                                                                                                                                                                       | Where sequence data have been generated and submitted to GISAID                              | Dan Lule Bugembe; Isaac Sseeewanyana; Matthew Cotten; My V.T. Phan; Patrick Semanda; Pontiano Kaleebu; Susan Nabadda                                                                                                                                                                                                                                                                                                                                                                                     |
| EPI_ISL_3149400,<br>EPI_ISL_3149401,<br>EPI_ISL_3149402,<br>EPI_ISL_3149403                                     | MRC/UVRI & LSHTM Uganda Research Unit , Rakai Health Sciences Program                                                                                                                                                       | MRC/UVRI & LSHTM Uganda Research Unit , Rakai Health Sciences Program                        | ; Charles Ssuuna; Matthew Cotten Dan Lule Bugembe; My V.T. Phan; Pontiano Kaleebu; Ronald Moses Galiwango; Steven J Reynolds                                                                                                                                                                                                                                                                                                                                                                             |
| EPI_ISL_2690447,<br>see above                                                                                   | EPI_ISL_2690448, EPI_ISL_2690449, EPI_ISL_2690450, EPI_ISL_2690451, EPI_ISL_2690456, EPI_ISL_2690458, EPI_ISL_2690459, EPI_ISL_2690461, EPI_ISL_2690462                                                                     | MRC/UVRI & LSHTM Uganda Research Unit, Central Public Health Laboratories                    | Dan Lule Bugembe; Hellen Nansumba; Isaac Sseeewanyana; Matthew Cotten; My V.T. Phan; Patrick Semanda; Pontiano Kaleebu; Susan Nabadda                                                                                                                                                                                                                                                                                                                                                                    |
| EPI_ISL_2690465,<br>see above                                                                                   | EPI_ISL_2690466, EPI_ISL_2690467, EPI_ISL_2690469, EPI_ISL_2690470, EPI_ISL_2690471, EPI_ISL_2690472, EPI_ISL_2690473, EPI_ISL_2690474, EPI_ISL_2690475, EPI_ISL_2690476                                                    | MRC/UVRI & LSHTM Uganda Research Unit, Rakai Health Sciences Program                         | Charles Ssuuna; Dan Lule Bugembe; Matthew Cotten; My V.T. Phan; Pontiano Kaleebu; Ronald Moses Galiwango; Steven J Reynolds                                                                                                                                                                                                                                                                                                                                                                              |
| EPI_ISL_3149350                                                                                                 | MRC/UVRI & LSHTM Uganda Research Unit, Central Public Health Laboratories                                                                                                                                                   | MRC/UVRI & LSHTM Uganda Research Unit, Central Public Health Laboratories                    | Dan Lule Bugembe; Hellen Nansumba; Isaac Sseeewanyana; Matthew Cotten; My V.T. Phan; Patrick Semanda; Pontiano Kaleebu; Susan Nabadda                                                                                                                                                                                                                                                                                                                                                                    |
| EPI_ISL_3152083,                                                                                                | MRCG                                                                                                                                                                                                                        | LBV Le Dantec                                                                                | ; Abdoulie Kante; Abdul Karim Cesay; Adjiratou Aissatou BA; Aminata Sileymane Thiam; Anna julienne Selbe NDiaye; Assane Dieng; Awa Ba-Diallo; Dianke Samaté; Gora Lo; Halimatou Diop Ndiaye; Jarra Manneh; Khadim Gueye; Makhtar Camara; Mbengué Fall; Moustapha Sakho;                                                                                                                                                                                                                                  |

|                                                                                                                                                                                                                                                                                                                                                                                                                                                                                                                                                                                                                                                     |                                                                                                                                                                                                                |                                                                                                                                                                                                       |                                                                                                                                                                                                                                                                                                                                                                                                                                                                                                                                                                                                                                                          |
|-----------------------------------------------------------------------------------------------------------------------------------------------------------------------------------------------------------------------------------------------------------------------------------------------------------------------------------------------------------------------------------------------------------------------------------------------------------------------------------------------------------------------------------------------------------------------------------------------------------------------------------------------------|----------------------------------------------------------------------------------------------------------------------------------------------------------------------------------------------------------------|-------------------------------------------------------------------------------------------------------------------------------------------------------------------------------------------------------|----------------------------------------------------------------------------------------------------------------------------------------------------------------------------------------------------------------------------------------------------------------------------------------------------------------------------------------------------------------------------------------------------------------------------------------------------------------------------------------------------------------------------------------------------------------------------------------------------------------------------------------------------------|
| EPI_ISL_3152106,<br>EPI_ISL_3152108                                                                                                                                                                                                                                                                                                                                                                                                                                                                                                                                                                                                                 |                                                                                                                                                                                                                |                                                                                                                                                                                                       | Oumy DIOP; Pasacaline Manga; Pauline Yacine Sene; Sada Diallo; Serigne Saliou Niame; ousseynou Gueye                                                                                                                                                                                                                                                                                                                                                                                                                                                                                                                                                     |
| EPI_ISL_428857, EPI_ISL_471158, EPI_ISL_471160, EPI_ISL_471168, EPI_ISL_561009, EPI_ISL_561024, EPI_ISL_561147, EPI_ISL_561213, EPI_ISL_810982, EPI_ISL_810986, EPI_ISL_811037, EPI_ISL_1216112, EPI_ISL_1234531, EPI_ISL_2142748, EPI_ISL_2802697, EPI_ISL_2941556, EPI_ISL_2941560, EPI_ISL_2958626, EPI_ISL_2958629, EPI_ISL_2958631, EPI_ISL_2958632, EPI_ISL_2958636, EPI_ISL_2958637, EPI_ISL_2958638, EPI_ISL_2958644, EPI_ISL_2958645, EPI_ISL_2958646, EPI_ISL_2958647, EPI_ISL_2958648, EPI_ISL_2958649, EPI_ISL_2958653, EPI_ISL_3150934                                                                                                 |                                                                                                                                                                                                                |                                                                                                                                                                                                       |                                                                                                                                                                                                                                                                                                                                                                                                                                                                                                                                                                                                                                                          |
| see above                                                                                                                                                                                                                                                                                                                                                                                                                                                                                                                                                                                                                                           | MRCG at LSHTM Genomics lab                                                                                                                                                                                     | MRCG at LSHTM Genomics lab                                                                                                                                                                            | Abdoulie Kante; Abdul Karim sesay; Bakary Sanyang; Dabiri Damilari; Damiri Damilari; Jarra Manneh; Mariama Kujabi; Sainabou laye Ndure; Sesay et al                                                                                                                                                                                                                                                                                                                                                                                                                                                                                                      |
| EPI_ISL_414476                                                                                                                                                                                                                                                                                                                                                                                                                                                                                                                                                                                                                                      | MSHS Clinical Microbiology Laboratories                                                                                                                                                                        | MSHS Pathogen Surveillance Program                                                                                                                                                                    | Adolfo Garcia-Sarstre; Alberto Paniz-mondolfi; Ana Sylvia Gonzalez-Reiche; Emilia Sorullo; Florian Krammer; Gopi Patel; Harm van Bakel; Jose Polanco; Judith Aberg; Lisa Miorin; Matthew Hernandez; Melissa Smith; Nancy Francoeur; Randy Albrecht; Robert Sebra; Shelcie Fabre; Viviana Simon; Wen-chun Liu; Zenaib Khan                                                                                                                                                                                                                                                                                                                                |
| EPI_ISL_1936102, EPI_ISL_1936104, EPI_ISL_1936107, EPI_ISL_1936108, EPI_ISL_1936109, EPI_ISL_1936111, EPI_ISL_1936112, EPI_ISL_1936113, EPI_ISL_1936115, EPI_ISL_1936116, EPI_ISL_1936117, EPI_ISL_1936124, EPI_ISL_1936127, EPI_ISL_1936134, EPI_ISL_1936137, EPI_ISL_1936139, EPI_ISL_1936140, EPI_ISL_1936145, EPI_ISL_1936240, EPI_ISL_1936241, EPI_ISL_1936242, EPI_ISL_1936243, EPI_ISL_1936245, EPI_ISL_1936246, EPI_ISL_1936248, EPI_ISL_1936249, EPI_ISL_1936250, EPI_ISL_1936257, EPI_ISL_1936261, EPI_ISL_1936262, EPI_ISL_1936264, EPI_ISL_1936265, EPI_ISL_1936271, EPI_ISL_1936272, EPI_ISL_1936298, EPI_ISL_1969080, EPI_ISL_1969081 |                                                                                                                                                                                                                | Abdullah Salama; AbedElrahman Zekri; Ahmed Gad; Bassem Elharty; Laila Elsayy; Mervat Hassan; Mohamed Seadawy; Mohamed Shamel; Mostfa Elhoseiny; Mostfa Yakout; Ola Elroby; Sabah Ahmed; Sherine Helmy |                                                                                                                                                                                                                                                                                                                                                                                                                                                                                                                                                                                                                                                          |
| see above                                                                                                                                                                                                                                                                                                                                                                                                                                                                                                                                                                                                                                           | Main Chemical Laboratories Egypt Army                                                                                                                                                                          | Main Chemical Laboratories Egypt Army                                                                                                                                                                 |                                                                                                                                                                                                                                                                                                                                                                                                                                                                                                                                                                                                                                                          |
| EPI_ISL_2779292                                                                                                                                                                                                                                                                                                                                                                                                                                                                                                                                                                                                                                     | Malaba border point                                                                                                                                                                                            | USAMRD-A, Basic Science Laboratory                                                                                                                                                                    | Alan Lemtudo; Beth Mutai; Brian Andika; Carol Kifude; Clement Masake; Eric Muthanj; Esther Omuseni; Faith Sigei; Gathii Kimita; George Awinda; John Waitumbi; Josphat Nyataya; Rachel Githii; Rehema Liyai; Stephen Ochola                                                                                                                                                                                                                                                                                                                                                                                                                               |
| EPI_ISL_1827704                                                                                                                                                                                                                                                                                                                                                                                                                                                                                                                                                                                                                                     | Manzana                                                                                                                                                                                                        | National Institute for Communicable Diseases of the National Health Laboratory Service                                                                                                                | Amoako DG; Bhiman JN; Ismail A; Mahlangu B; Maphalala GP; Mohale T; Ntuli N; Scheepers C                                                                                                                                                                                                                                                                                                                                                                                                                                                                                                                                                                 |
| EPI_ISL_1363775                                                                                                                                                                                                                                                                                                                                                                                                                                                                                                                                                                                                                                     | Maryland Genomics, Institute for Genome Sciences, University of Maryland School of Medicine                                                                                                                    | Maryland Genomics, Institute for Genome Sciences, University of Maryland School of Medicine                                                                                                           | Aditya; Claire M; Fraser; Holly; Humphrys; Jacques; Kranthi; Lisa D; Luke J; Mehta; Mike; Ott; Ravel; Roussey; Sadzewicz; Sandra; Tallon; Vavikolanu                                                                                                                                                                                                                                                                                                                                                                                                                                                                                                     |
| EPI_ISL_1910608, EPI_ISL_1913025                                                                                                                                                                                                                                                                                                                                                                                                                                                                                                                                                                                                                    | Mashrek Medical Diagnostic Center                                                                                                                                                                              | Microbial Pathogenomics Lab - LAU                                                                                                                                                                     | Georgi Merhi; Jad Koweyes; Sima Tokajian; Tamara Salloum                                                                                                                                                                                                                                                                                                                                                                                                                                                                                                                                                                                                 |
| EPI_ISL_1196007                                                                                                                                                                                                                                                                                                                                                                                                                                                                                                                                                                                                                                     | Mbabane Gov Hospital                                                                                                                                                                                           | National Institute for Communicable Diseases of the National Health Laboratory Service                                                                                                                | Amoako DG; Bhiman JN; Ismail A; Mahlangu B; Maphalala GP; Mohale T; Ntuli N; Scheepers C                                                                                                                                                                                                                                                                                                                                                                                                                                                                                                                                                                 |
| EPI_ISL_482761, EPI_ISL_483035, EPI_ISL_483037, EPI_ISL_1109484, EPI_ISL_1165080                                                                                                                                                                                                                                                                                                                                                                                                                                                                                                                                                                    | Medical Ain Shams Research Institute (MASRI), Ain Shams University                                                                                                                                             | Medical Ain Shams Research Institute (MASRI), Ain Shams University                                                                                                                                    | Ahmad Moustafa; Ashraf Omar; Aya Mohamed; Fatma Ebied; Ghada Ismael; Hagar Elshora; Hala Hafez; Hesham Elghazaly; Hoda Ezz Elarab; Iman Foda; Mahmoud Elmetini; Manal Hamdy Elsaid; Mohamed Elhadidi; Osama Mansour; Osama Mansour.; Reham Kassab; Reham Mamdouh; Samia Abdou Girgis; Sara Elnakeep; Sara Hassan Agwa; Shaimaa Moustafa; Shima Moustafa                                                                                                                                                                                                                                                                                                  |
| EPI_ISL_2107509, EPI_ISL_2107524                                                                                                                                                                                                                                                                                                                                                                                                                                                                                                                                                                                                                    | Medical Laboratory Sciences, Arab American University                                                                                                                                                          | Medical Laboratory Sciences, Arab American University                                                                                                                                                 | Al-Jawabreh, A.; Al-Jawabreh, H.; Dumaidi, K.; Ereqat, S.; Nasereddin, A.                                                                                                                                                                                                                                                                                                                                                                                                                                                                                                                                                                                |
| EPI_ISL_1156171                                                                                                                                                                                                                                                                                                                                                                                                                                                                                                                                                                                                                                     | Medizinisches Labor Wahl Lüdenscheid                                                                                                                                                                           | Robert Koch Institute                                                                                                                                                                                 |                                                                                                                                                                                                                                                                                                                                                                                                                                                                                                                                                                                                                                                          |
| EPI_ISL_480338                                                                                                                                                                                                                                                                                                                                                                                                                                                                                                                                                                                                                                      | Microbial Genomics Laboratory, Institut Pasteur de Montevideo                                                                                                                                                  | Microbial Genomics Laboratory, Institut Pasteur de Montevideo                                                                                                                                         | Cecilia Salazar; Gonzalo Moratorio; Gregorio Iraola; Ignacio Ferrés; Marianoel Pereira; Pilar Moreno                                                                                                                                                                                                                                                                                                                                                                                                                                                                                                                                                     |
| EPI_ISL_562386                                                                                                                                                                                                                                                                                                                                                                                                                                                                                                                                                                                                                                      | Microbiological Diagnostic Unit - Public Health Laboratory (MDU-PHL)                                                                                                                                           | MDU-PHL                                                                                                                                                                                               | Sait, M.; Schultz M. B.; Seemann, T.; Sherry, N.                                                                                                                                                                                                                                                                                                                                                                                                                                                                                                                                                                                                         |
| EPI_ISL_2136858, EPI_ISL_2281323                                                                                                                                                                                                                                                                                                                                                                                                                                                                                                                                                                                                                    | Microbiology Department, Laboratori Clinic Metropolitana Nord. Hospital Universitari Germans Trias i Pujol                                                                                                     | Can Ruti SARS-CoV-2 Sequencing Hub (HUGTIP/IRSI/Caixa/GTP)                                                                                                                                            | Alba Sánchez; Anna Not; Antoni E Bordoy; Bonaventura Clotet; Cristina Casañ; Cristina Esteban; Francesc Catala-Moll; Gemma Clara; Ignacio Blanco; Marc Noguera-Julian; Maria Casadellà; Mariona Parera; Mercedes Guerrero; Montserrat Giménez; Pere-Joan Cardona; Pilar Armengol; Roger Paredes; Verónica Saludes; and Elisa Martró on behalf of the Can Ruti SARS-CoV-2 Sequencing Hub.                                                                                                                                                                                                                                                                 |
| EPI_ISL_1347071, EPI_ISL_1386061, EPI_ISL_1583545, EPI_ISL_1636446                                                                                                                                                                                                                                                                                                                                                                                                                                                                                                                                                                                  | Microbiology Department, Laboratori Clinic Metropolitana Nord. Hospital Universitari Germans Trias i Pujol.                                                                                                    | Can Ruti SARS-CoV-2 Sequencing Hub (HUGTIP/IRSI/Caixa/GTP)                                                                                                                                            | Alba Sánchez; Anna Not; Antoni E Bordoy; Bonaventura Clotet; Cristina Casañ; Cristina Esteban; Francesc Catala-Moll; Gemma Clara; Ignacio Blanco; Marc Noguera-Julian; Maria Casadellà; Mariona Parera; Mercedes Guerrero; Montserrat Giménez; Pere-Joan Cardona; Pilar Armengol; Roger Paredes; Verónica Saludes; and Elisa Martró on behalf of the Can Ruti SARS-CoV-2 Sequencing Hub.                                                                                                                                                                                                                                                                 |
| EPI_ISL_1495974                                                                                                                                                                                                                                                                                                                                                                                                                                                                                                                                                                                                                                     | Microbiology Department, University Hospital Donostia                                                                                                                                                          | Microbiology Department, University Hospital Donostia                                                                                                                                                 | Cilla G.; Gomez M; Marimón JM; Montes M; Piñeiro L; Sorraín A                                                                                                                                                                                                                                                                                                                                                                                                                                                                                                                                                                                            |
| EPI_ISL_2688489                                                                                                                                                                                                                                                                                                                                                                                                                                                                                                                                                                                                                                     | Microbiology Laboratory, Attikon University Hospital, Athens                                                                                                                                                   | Central National Laboratory ,Public Health Organization                                                                                                                                               | N.Siafakas; S.Pournaras et al                                                                                                                                                                                                                                                                                                                                                                                                                                                                                                                                                                                                                            |
| EPI_ISL_1064028                                                                                                                                                                                                                                                                                                                                                                                                                                                                                                                                                                                                                                     | Microbiology and Virology Unit, Azienda Ospedale Padova, Padova, Italy                                                                                                                                         | Department of Molecular Medicine, Computational Medicine Group, Univeresity of Padova, Padova, Italy                                                                                                  | Andrea Crisanti; Andrea Spitaleri; Claudia Del Vecchio; Daniela Maria Cirillo; Dejan Lazarevic; Elisa Franchini; Enrico Lavezzo; Fabio Simeoni; Federico Bianca; Francesca Saluzzo; Francesco Onella; Giovanni Lorenzin; Giovanni Tonon; Laura Manuto; Marco Grazioli; Stefano Toppo                                                                                                                                                                                                                                                                                                                                                                     |
| EPI_ISL_2348487                                                                                                                                                                                                                                                                                                                                                                                                                                                                                                                                                                                                                                     | Middle East Institute of Health University Hospital                                                                                                                                                            | Microbial Pathogenomics Lab - LAU                                                                                                                                                                     | Edmond Abboud; Georgi Merhi; Jad Koweyes; Sima Tokajian                                                                                                                                                                                                                                                                                                                                                                                                                                                                                                                                                                                                  |
| EPI_ISL_548103, EPI_ISL_548121, EPI_ISL_2406492                                                                                                                                                                                                                                                                                                                                                                                                                                                                                                                                                                                                     | Middlemore Hospital                                                                                                                                                                                            | Institute of Environmental Science and Research (ESR)                                                                                                                                                 | Anja Werno; Antje van der Linden; Arlo Upton; Chris Mansell; David Hammer; Dragana Drinkovic; Erasmus Smit; Gary McAuliffe; Hana Sofia Andersson; Hermes Perez; James Usher; Jill Sherwood; Jing Wang; Joep de Ligt; Josh Freeman; Julia Howard; Juliet Elvy; Lauren Jelly; Mary DeAlmeida; Matt Blakiston; Matt Storey; Matthew Rogers; Max Bloomfield; Michael Addide; Michelle Bain; Muhammad Faisal; Nikki Freed; Olin Slander; Olivia Stroeve; Rachel Boyle; Sally Roberts; SallyAnn Harbison; Sarah Jefferies; Sharmineh Muttaiyah; Susan Morphett; Susan Taylor; Timothy Blackmore; Vani Sathyendran; Veronica Playle; Virginia Hope; Xiaoyun Ren |
| EPI_ISL_906049, EPI_ISL_940711, EPI_ISL_1063988, EPI_ISL_1063989, EPI_ISL_1170076, EPI_ISL_2158074                                                                                                                                                                                                                                                                                                                                                                                                                                                                                                                                                  | Ministry of Health Turkey                                                                                                                                                                                      | Ministry of Health Turkey                                                                                                                                                                             | Ayşe Basak Altas; Ayşe Başak Altas; Fatma Bayraktar; Gulay Korukluoglu; Gulay Korukluoglu; Suleyman Yalcin; Suleyman Yalcin; Yasemin Cosgun; Yasemin Cosgun                                                                                                                                                                                                                                                                                                                                                                                                                                                                                              |
| EPI_ISL_1713274, EPI_ISL_1713276, EPI_ISL_1713637, EPI_ISL_1713938, EPI_ISL_2274319, EPI_ISL_2408295, EPI_ISL_2843089, EPI_ISL_2843112                                                                                                                                                                                                                                                                                                                                                                                                                                                                                                              |                                                                                                                                                                                                                |                                                                                                                                                                                                       |                                                                                                                                                                                                                                                                                                                                                                                                                                                                                                                                                                                                                                                          |
| see above                                                                                                                                                                                                                                                                                                                                                                                                                                                                                                                                                                                                                                           | Ministry of Public Health / Hamad Medical Corporation                                                                                                                                                          | Biomedical Research Center (BRC), Qatar University / Qatar Genome Project (QGP)                                                                                                                       | Asmaa A. Al-Thani. MOPH and HMC; Abdullatif Al-Khal; Asmaa A. Al-Thani. MOPH and HMC; Abdullatif Al-Khal; BRC; Fatiha M. Benslimane; Chadi Saad; Dana Al-Batesh; Dina Elgakhlab OGP; Fatima H. Al-Kuwari; Dina Elgakhlab OGP; Fatima H. Al-Kuwari; Elnas A. E. Al-Kuwari; Hadi M. Yassine; Hamad E. Al-Romaihi; Hamda Alromaihi; Heba A. Al-Khatib; Masha'el A. Al-Bader; Mohammed Al-Thani; Muna A. S. Al-Maslmani; Qal Al-Jamal; Peter V. Coyle; Reham A. El-Kahlout. QBB; Tasneem Al-Hamad; Reham A. El-Kahlout. QBB; Tasneem Al-Hamad; Roberto Bertolini; Salih Al-Marri                                                                             |
| EPI_ISL_1714023, EPI_ISL_1714185, EPI_ISL_1714436, EPI_ISL_1714461, EPI_ISL_1714618                                                                                                                                                                                                                                                                                                                                                                                                                                                                                                                                                                 | Ministry of Public Health / Hamad Medical Corporation                                                                                                                                                          | Weill Cornell Medical College - Qatar (WCM-Q), Genomics Core Laboratory / Qatar Genome Project (QGP)                                                                                                  | Chadi Saad MOPH and HMC; Abdullatif Al-Khal; Dina Elgakhlab; Elnas A. E. Al-Kuwari; Hamad E. Al-Romaihi; Hamda Alromaihi; Joel A Malek. OGP; Fatima H. Al-Kuwari; Laith Abu-Raddad; Masha'el A. Al-Bader; Meryem Bensaad; Mohammed Al-Thani; Muna A. S. Al-Maslmani; Peter V. Coyle; Reham A. El-Kahlout. QBB; Tasneem Al-Hamad; Roberto Bertolini; Salih Al-Marri; Shameem Younsukunju; WCMQ; Ayeda A. Ahmed; Yasmin Mohamoud                                                                                                                                                                                                                           |
| EPI_ISL_2140698, EPI_ISL_2375989                                                                                                                                                                                                                                                                                                                                                                                                                                                                                                                                                                                                                    | Mitchells Plain Hospital wc MPH                                                                                                                                                                                | NHLs/UCT                                                                                                                                                                                              | Arash Iranzadeh; Bruna Galvao; Carolyn Williamson; Deelan Doolah; Diana Hardie; Innocent Mudau; Kruger Marais; Lynn Tyers; Marvin Hsiao; Stephen Korsman                                                                                                                                                                                                                                                                                                                                                                                                                                                                                                 |
| EPI_ISL_463740                                                                                                                                                                                                                                                                                                                                                                                                                                                                                                                                                                                                                                      | Mohammed Bin Rashid University of Medicine and Health Sciences                                                                                                                                                 | Al Jalilia Genomics Center                                                                                                                                                                            | Abdulmajeed Alkhaja; Abiola Catherine Senok; Ahmad Abou Tayoun; Alawi Alsheikh-Ali; Divinlal Harilal; Hamda Khansaheb; Hanan Al Suwaidi; Mohammed Uddin; Norbert Nowotny; Qutayba Hamid; Rabih Halwani; Rifat Hamoudi; Rupa Murthy Varghese; Sathishkumar Ramaswamy; Tom Loney; Zulfia Omar Deesi                                                                                                                                                                                                                                                                                                                                                        |
| EPI_ISL_904015                                                                                                                                                                                                                                                                                                                                                                                                                                                                                                                                                                                                                                      | Molecular Biology and Virology lab, Faculty of Veterinary Medicine, Jordan University of Science and Technology                                                                                                | Molecular Biology and Virology lab, Faculty of Veterinary Medicine, Jordan University of Science and Technology                                                                                       | Dr.Mahmoud Hamad Gazo; Dr.Moh'D Borhan Al-Zghoul; Dr.Mustafa Ababneh; Dr.Saied Jaradat; Ghaya Abdellatif Alwahdane; Hazem Haddad; Mohammad Hussien Alboom; Suhaila Ibrahim Khalil                                                                                                                                                                                                                                                                                                                                                                                                                                                                        |
| EPI_ISL_421573                                                                                                                                                                                                                                                                                                                                                                                                                                                                                                                                                                                                                                      | Molecular Diagnostic Services                                                                                                                                                                                  | KRISP, KZN Research Innovation and Sequencing Platform                                                                                                                                                | Chimukangara B; Deforcek K; Giandhari J; Lessells R; Ngcapu S; Pillay S; Samsunder N; Tegally H; Wilkinson E; de Oliveira T                                                                                                                                                                                                                                                                                                                                                                                                                                                                                                                              |
| EPI_ISL_2097215, EPI_ISL_2101358, EPI_ISL_2105875, EPI_ISL_2399457, EPI_ISL_2399546                                                                                                                                                                                                                                                                                                                                                                                                                                                                                                                                                                 | Molecular Diagnostics Pathology Department Mater Dei Hospital Malta                                                                                                                                            | Molecular Diagnostics Pathology Department Mater Dei Hospital Malta                                                                                                                                   | C Cilia; G Zahra; L Grech; M Briffa; R Borg                                                                                                                                                                                                                                                                                                                                                                                                                                                                                                                                                                                                              |
| EPI_ISL_802549, EPI_ISL_802550                                                                                                                                                                                                                                                                                                                                                                                                                                                                                                                                                                                                                      | Molecular Microbiology and Food Research Laboratory (MMFRLAB) - Universidad San Sebastián                                                                                                                      | Facultad de Ciencias de la Vida, UNAB                                                                                                                                                                 | Claudio Meneses; César Echeverría; Dayán Sanhueza; Eduardo Castro; Jorge Olivares; Macarena Bastías; Sebastián Wolter; Waldo Díaz                                                                                                                                                                                                                                                                                                                                                                                                                                                                                                                        |
| EPI_ISL_895745, EPI_ISL_895767, EPI_ISL_895834                                                                                                                                                                                                                                                                                                                                                                                                                                                                                                                                                                                                      | Molecular biology division, Institute of Clinical Biochemistry and Diagnostics, Charles University, Faculty of Medicine in Hradec Králové and University Hospital Hradec Králové                               | Molecular biology division, Institute of Clinical Biochemistry and Diagnostics, Charles University, Faculty of Medicine in Hradec Králové and University Hospital Hradec Králové                      | Helena Kovářková; Ivana Baranová; Jitka Novotná; Kateřina Hrochová; Kateřina Pehliková; Petr Brož; Tereza Bařková; Vladimír Paříčka. Cooperation project with BioVendor-R&D and bioinformatics company BIOXSYS s.r.o.                                                                                                                                                                                                                                                                                                                                                                                                                                    |
| EPI_ISL_2448657, EPI_ISL_2626244, EPI_ISL_3101330                                                                                                                                                                                                                                                                                                                                                                                                                                                                                                                                                                                                   | Molecular diagnostic laboratory of Federal Budget Institution of Science "Central Research Institute of Epidemiology" of The Federal Service on Customers' Rights Protection and Human Well-being Surveillance | Group of Genomics and Postgenomic Technologies of Central Research Institute of Epidemiology                                                                                                          | Akimkin V.G.; Berlina Y.Y.; Bulanenko V.P.; Cherkashina A.S.; Dohoyan A.Y.; Golubeva A.G.; Kaptelova V.V.; Kondrasheva L.Y.; Korneenko E.V.; Nadtoka M.I.; Saenko S.S.; Samolov A.E.; Shipulina O.Y.; Sinitsyn S.O.; Smirnova Y.S.; Solovieva E.D.; Speranskaya A.S.; Tivanova E.V.; Valdohina A.V.; Zotova M.I.; Zuev S.N.                                                                                                                                                                                                                                                                                                                              |

|                                                                                                                                                                                                                                                                                                                                                                                     |                                                                                                     |                                                                                                                                                     |                                                                                                                                                                                                                                                                                                                                                                                                                                                                                                                                                                                                                                                                          |                                                                                                                                                                                                                                                                                           |  |
|-------------------------------------------------------------------------------------------------------------------------------------------------------------------------------------------------------------------------------------------------------------------------------------------------------------------------------------------------------------------------------------|-----------------------------------------------------------------------------------------------------|-----------------------------------------------------------------------------------------------------------------------------------------------------|--------------------------------------------------------------------------------------------------------------------------------------------------------------------------------------------------------------------------------------------------------------------------------------------------------------------------------------------------------------------------------------------------------------------------------------------------------------------------------------------------------------------------------------------------------------------------------------------------------------------------------------------------------------------------|-------------------------------------------------------------------------------------------------------------------------------------------------------------------------------------------------------------------------------------------------------------------------------------------|--|
| EPI_ISL_1365023, EPI_ISL_1365027, EPI_ISL_1365030, EPI_ISL_1663659, EPI_ISL_1663663, EPI_ISL_1663669, EPI_ISL_1663676                                                                                                                                                                                                                                                               |                                                                                                     |                                                                                                                                                     |                                                                                                                                                                                                                                                                                                                                                                                                                                                                                                                                                                                                                                                                          |                                                                                                                                                                                                                                                                                           |  |
| see above                                                                                                                                                                                                                                                                                                                                                                           | Molecular diagnostic unit for viral haemorrhagic fevers and emerging viruses, Bouaké CHU Laboratory | Molecular diagnostic unit for viral haemorrhagic fevers and emerging viruses, Bouaké CHU Laboratory                                                 | Adjaratou Traoré; Bamba Fatoumata Touré; Chantal Akoua-Koffi; Coulibaly Mbegan; Diané Bamourou; Essia Belarbi; Etilé Aneh; Fabian Leendertz; Grit Schubert; Kra Ouffoué; Monemo Pacome; Oby Wayoro; Safiatou Karidioula; Soundélé Maité                                                                                                                                                                                                                                                                                                                                                                                                                                  |                                                                                                                                                                                                                                                                                           |  |
| EPI_ISL_614350, EPI_ISL_614379, EPI_ISL_614380, EPI_ISL_681841, EPI_ISL_682058, EPI_ISL_1662584                                                                                                                                                                                                                                                                                     | Molecular diagnostic unit for viral haemorrhagic fevers and emerging viruses, Bouaké CHU Laboratory | Project group Epidemiology of Highly Pathogenic Microorganisms, Robert Koch-Institute                                                               | Adjaratou Traoré; Bamba Fatoumata Touré; Chantal Akoua-Koffi; Coulibaly Mbegan; Diané Bamourou; Essia Belarbi; Etilé Aneh; Fabian Leendertz; Grit Schubert; Kra Ouffoué; Monemo Pacome; Safiatou Karidioula; Soundélé Maité                                                                                                                                                                                                                                                                                                                                                                                                                                              |                                                                                                                                                                                                                                                                                           |  |
| EPI_ISL_1867965, EPI_ISL_1871906, EPI_ISL_1878641                                                                                                                                                                                                                                                                                                                                   | Molekylær Medicinsk Afdeling, Aarhus University Hospital, Aarhus, Denmark                           | Aalborg University                                                                                                                                  |                                                                                                                                                                                                                                                                                                                                                                                                                                                                                                                                                                                                                                                                          | Danish Covid-19 Genome Consortium                                                                                                                                                                                                                                                         |  |
| EPI_ISL_889357, EPI_ISL_889361                                                                                                                                                                                                                                                                                                                                                      | Motol University Hospital                                                                           | Institute of Applied Biotechnologies a.s.                                                                                                           |                                                                                                                                                                                                                                                                                                                                                                                                                                                                                                                                                                                                                                                                          | Kateřina Kvapilová; Martin Kašný; Ondřej Brzoň; Pavel Dřevínek; Petr Klempť; Petr Kvapil                                                                                                                                                                                                  |  |
| EPI_ISL_3031397, EPI_ISL_855001                                                                                                                                                                                                                                                                                                                                                     | Mount Kenya Hospital<br>NGS Lab, DNA SOLUTION LTD.                                                  | USAMRD-A, Basic Science Laboratory<br>NGS Lab, DNA SOLUTION LTD.                                                                                    | Alan Lemtudo; Beth Mutai; Brian Andika; Carol Kifude; Clement Masakwe; Eric Muthanje; Esther Omuseni; Faith Sigei; Gathil Kimita; George Awinda; John Waitumbi; Josphat Nyataya; Rachel Githii; Rehema Liyai; Stephen Ochola                                                                                                                                                                                                                                                                                                                                                                                                                                             |                                                                                                                                                                                                                                                                                           |  |
| EPI_ISL_2770480                                                                                                                                                                                                                                                                                                                                                                     | NHLS Charlotte Maxeke Johannesburg Academic Hospital and the University of the Witwatersrand        | KRISP, KZN Research Innovation and Sequencing Platform                                                                                              | Bulelani Manene; Florette Treurnicht; Giandhari Jennifer; Kathleen Subramoney; Naidoo Yeshnee; Pillay Sureshnee; San James; Tegally Houriyah; Tshabula Derek; Wilkinson Eduan; Yajna Ramphal; de Oliveira Tulio                                                                                                                                                                                                                                                                                                                                                                                                                                                          |                                                                                                                                                                                                                                                                                           |  |
| EPI_ISL_912537, EPI_ISL_2162305, EPI_ISL_2162311, EPI_ISL_2162315, EPI_ISL_2162319, EPI_ISL_2162326, EPI_ISL_2162330, EPI_ISL_2162340, EPI_ISL_2162347, EPI_ISL_2162351, EPI_ISL_2162352, EPI_ISL_2162354, EPI_ISL_2162357, EPI_ISL_2162361, EPI_ISL_2162364, EPI_ISL_2162365, EPI_ISL_2162366, EPI_ISL_2162369, EPI_ISL_2162372, EPI_ISL_2162374, EPI_ISL_2162375, EPI_ISL_2162376 |                                                                                                     |                                                                                                                                                     |                                                                                                                                                                                                                                                                                                                                                                                                                                                                                                                                                                                                                                                                          | D Goedhals; Emmanuel Ogunbayo; MM Nyaga; MT Mogotsi; P Nthiga; PA Bester; T de Oliveira                                                                                                                                                                                                   |  |
| see above                                                                                                                                                                                                                                                                                                                                                                           | NHLS Universitas Academic                                                                           | UFS Virology                                                                                                                                        |                                                                                                                                                                                                                                                                                                                                                                                                                                                                                                                                                                                                                                                                          | Chimukangara B; ChimukangaraB; Giandhari J; Khan S; Lessells R; Mdlalose K; Pillay S; Tegally H; Wilkinson E; York D; de Oliveira T                                                                                                                                                       |  |
| EPI_ISL_467439, EPI_ISL_602772, EPI_ISL_736970                                                                                                                                                                                                                                                                                                                                      | NHLS-IALCH                                                                                          | KRISP, KZN Research Innovation and Sequencing Platform                                                                                              |                                                                                                                                                                                                                                                                                                                                                                                                                                                                                                                                                                                                                                                                          |                                                                                                                                                                                                                                                                                           |  |
| EPI_ISL_2494465, EPI_ISL_2494476, EPI_ISL_2494502, EPI_ISL_2494505, EPI_ISL_2494507, EPI_ISL_2494510, EPI_ISL_2494514, EPI_ISL_2494515, EPI_ISL_2494516, EPI_ISL_2494517, EPI_ISL_2494541, EPI_ISL_2494542, EPI_ISL_2494621, EPI_ISL_2494624, EPI_ISL_2494625                                                                                                                       |                                                                                                     |                                                                                                                                                     |                                                                                                                                                                                                                                                                                                                                                                                                                                                                                                                                                                                                                                                                          | Baillie Vicky; Giandhari Jennifer; Madhi Shabir; Naidoo Yeshnee; Pillay Sureshnee; San James; Tegally Houriyah; Tshabula Derek; Wilkinson Eduan; de Oliveira Tulio; du Plessis Jeanine                                                                                                    |  |
| EPI_ISL_2693824, EPI_ISL_2693831, EPI_ISL_2693881, EPI_ISL_2693883, EPI_ISL_2693895, EPI_ISL_2693896, EPI_ISL_2693898, EPI_ISL_2893259, EPI_ISL_2893263, EPI_ISL_2893285, EPI_ISL_2893287, EPI_ISL_2893282, EPI_ISL_2893285, EPI_ISL_2893288, EPI_ISL_2893293, EPI_ISL_2893298, EPI_ISL_3275356, EPI_ISL_3275368                                                                    |                                                                                                     |                                                                                                                                                     |                                                                                                                                                                                                                                                                                                                                                                                                                                                                                                                                                                                                                                                                          | Emmanuel SJ; Giandhari J; Giandhari Jennifer; Khan S; Laguda-Akingba O; Lessells R; Mdlalose K; Naidoo Yeshnee; Pillay S; Pillay Sureshnee; San James; Tegally H; Tegally Houriyah; Tshabula Derek; Wilkinson E; Wilkinson Eduan; Yajna Ramphal; York D; de Oliveira T; de Oliveira Tulio |  |
| see above                                                                                                                                                                                                                                                                                                                                                                           | NHLS_VIRO Eastern Cape                                                                              | KRISP, KZN Research Innovation and Sequencing Platform                                                                                              | Emmanuel SJ; Giandhari J; Khan S; Laguda-Akingba O; Lessells R; Mdlalose K; Pillay S; Tegally H; Wilkinson E; York D; de Oliveira T                                                                                                                                                                                                                                                                                                                                                                                                                                                                                                                                      |                                                                                                                                                                                                                                                                                           |  |
| EPI_ISL_2727180, EPI_ISL_2727185, EPI_ISL_2727186, EPI_ISL_2727194, EPI_ISL_2727196, EPI_ISL_2727197, EPI_ISL_2727198, EPI_ISL_2727206, EPI_ISL_2727216                                                                                                                                                                                                                             |                                                                                                     |                                                                                                                                                     |                                                                                                                                                                                                                                                                                                                                                                                                                                                                                                                                                                                                                                                                          |                                                                                                                                                                                                                                                                                           |  |
| see above                                                                                                                                                                                                                                                                                                                                                                           | NHLS_VIRO Eastern Cape                                                                              | KRISP, KZN Research Innovation and Sequencing Platform                                                                                              | Emmanuel SJ; Giandhari J; Khan S; Laguda-Akingba O; Lessells R; Mdlalose K; Pillay S; Tegally H; Wilkinson E; York D; de Oliveira T                                                                                                                                                                                                                                                                                                                                                                                                                                                                                                                                      |                                                                                                                                                                                                                                                                                           |  |
| EPI_ISL_418241, EPI_ISL_420037, EPI_ISL_766863, EPI_ISL_766864, EPI_ISL_766871, EPI_ISL_766873, EPI_ISL_766874, EPI_ISL_766875                                                                                                                                                                                                                                                      |                                                                                                     |                                                                                                                                                     |                                                                                                                                                                                                                                                                                                                                                                                                                                                                                                                                                                                                                                                                          |                                                                                                                                                                                                                                                                                           |  |
| see above                                                                                                                                                                                                                                                                                                                                                                           | NIC Viral Respiratory Unit - Institut Pasteur of Algeria                                            | National Reference Center for Viruses of Respiratory Infections, Institut Pasteur, Paris                                                            | Angela Brisebarre; Etienne Simon-Lorière; Fawzi Derrar; Flora Donati; Marion Barbet; Maud Vanpeene; Mélanie Albert; Méline Bizard; Sylvie Behilli; Sylvie van der Werf; Vincent Enouf                                                                                                                                                                                                                                                                                                                                                                                                                                                                                    |                                                                                                                                                                                                                                                                                           |  |
| EPI_ISL_3161806, EPI_ISL_3161807, EPI_ISL_3161808                                                                                                                                                                                                                                                                                                                                   | NIC, Viral Respiratory Unit                                                                         | Virology Departement                                                                                                                                | Aicha Bensalem; Aissam Hachid; Aïla Grad; Amel Benyahia; Fawzi Derrar; Fayež Khardini; Fetouma Doudou; Mohamed Amine Beloufa; Nardjes Hihi                                                                                                                                                                                                                                                                                                                                                                                                                                                                                                                               |                                                                                                                                                                                                                                                                                           |  |
| EPI_ISL_454548, EPI_ISL_454561                                                                                                                                                                                                                                                                                                                                                      | NIV Influenza                                                                                       | NIV Influenza                                                                                                                                       |                                                                                                                                                                                                                                                                                                                                                                                                                                                                                                                                                                                                                                                                          | Potdar V                                                                                                                                                                                                                                                                                  |  |
| EPI_ISL_422403                                                                                                                                                                                                                                                                                                                                                                      | NMIMR, Department of Virology                                                                       | WACCBIIP, University of Ghana                                                                                                                       | Abraham Kwabena Anang; Augustina Arjarquah; Bright Adu; Collins M. Morang'a; Dominic S. Y. Amuzu; Erasmus Kotey; Evelyn Bonney; Fred Tei-Maya; George B. Kyeli; Gordon A. Awandare; Ivy Asante; Joyce M. Ngoi; Kofi Bonney; Linda Boatemaa; Miriam Eshun; Peter Quashie; Selassie Kumordjie; Vanessa Magnusson; William Ampofo                                                                                                                                                                                                                                                                                                                                           |                                                                                                                                                                                                                                                                                           |  |
| EPI_ISL_1587554, EPI_ISL_1587569, EPI_ISL_1587570                                                                                                                                                                                                                                                                                                                                   | NOVABIO BERGERAC                                                                                    | CNR Virus des Infections Respiratoires - France SUD                                                                                                 | Antonin Bal; Bruno Lina; Gregory Destras; Gwendolyne Burfin; Hadrien Regue; Laurence Josset; Martine Valette; Quentin Semanas                                                                                                                                                                                                                                                                                                                                                                                                                                                                                                                                            |                                                                                                                                                                                                                                                                                           |  |
| EPI_ISL_1707512, EPI_ISL_1707513, EPI_ISL_1707514, EPI_ISL_1707515, EPI_ISL_1707517                                                                                                                                                                                                                                                                                                 | NOVABIO DORDOGNE                                                                                    | CNR Virus des Infections Respiratoires - France SUD                                                                                                 | Antonin Bal; Bruno Lina; Gregory Destras; Gwendolyne Burfin; Hadrien Regue; Laurence Josset; Martine Valette; Quentin Semanas                                                                                                                                                                                                                                                                                                                                                                                                                                                                                                                                            |                                                                                                                                                                                                                                                                                           |  |
| EPI_ISL_1253574, EPI_ISL_1253575, EPI_ISL_1253576                                                                                                                                                                                                                                                                                                                                   | NOVELAB Ingels Vignon                                                                               | CNR Virus des Infections Respiratoires - France SUD                                                                                                 | Antonin Bal; Bruno Lina; Gregory Destras; Gwendolyne Burfin; Hadrien Regue; Laurence Josset; Martine Valette; Quentin Semanas                                                                                                                                                                                                                                                                                                                                                                                                                                                                                                                                            |                                                                                                                                                                                                                                                                                           |  |
| EPI_ISL_2162093                                                                                                                                                                                                                                                                                                                                                                     | NS-QEII Health Sciences Centre                                                                      | National Microbiology Laboratory (NML)                                                                                                              | Anna Majer; Anneliese Landgraff; CanCOGen's metadata curation team; Dan Gaston; Darian Hole; Elsie Grudeski; Gary Van Domselaar; Grace Seo; Janice Pettipas; Jason LeBlanc; Jennifer Tanner; Kirsten Biggar; Madison Chapel; Morag Graham; Natalie Knox; Nathalie Bastien; Philip Mabon; Public Health Agency of Canada CanCOGen team; Rhiannon Huzarewich; Russell Mandes; Shari Tyson; Timothy Booth; Todd Hatchette; Yan Li                                                                                                                                                                                                                                           |                                                                                                                                                                                                                                                                                           |  |
| EPI_ISL_444638                                                                                                                                                                                                                                                                                                                                                                      | NYU Langone Health                                                                                  | Departments of Pathology and Medicine, New York University School of Medicine                                                                       | Adriana Heguy; Alireza Khodadadi-Jamayan; Amy Rapkiewicz; Andre M. Ribeiro-dos-Santos; Andrew Lytle; Antonio Serrano; Brendan Belovarov; Christian Marie; Dacia Dimartino; Emily Guzman; Emily Huang; Gael Westby; George Jour; Guomiao Shen; Iman Osman; Jared Pinnell; John Cadley; John Chen; Lawrence H. Lin; Ludovic Boyard; Margaret Black; Maria Aguiero-Rosenfeld; Marie Samanovic-Golden; Mark J. Mulligan; Matjaja Snuderl; Matthew T. Maurano; Megan Hogan; Nick Vulpescu; Paolo Cotzia; Paul Zappile; Peter Meyn; Raquel Ordonez Ciriza; Raven Luther; Sitharam Ramaswami; Tatyana Gindin; Theodore Vougiouklakis; Vanessa Raabe; Xiaojun Feng; Yutong Zhang |                                                                                                                                                                                                                                                                                           |  |
| EPI_ISL_2800233                                                                                                                                                                                                                                                                                                                                                                     | Nacionālais medicīnas serviss - laboratorija, SIA                                                   | Riga East University Hospital, National Microbiology Reference Laboratory; Eurofins Genomics Europe Sequencing GmbH                                 | Arzu Alguileva; Diāna Dušacka; Dārta Pūpola; Ilva Pole; Inita Balta; Jevgenijs Bodrenko; Jūlija Čevere; Nataja Mikena; Reinis Vangravs; Reinis Zeltmatis; Sergejs Nīkišins; Ģirts Škenders                                                                                                                                                                                                                                                                                                                                                                                                                                                                               |                                                                                                                                                                                                                                                                                           |  |
| EPI_ISL_2674519                                                                                                                                                                                                                                                                                                                                                                     | Nastavni zavod za javno zdravstvo Primorsko-Goranske Zupanije                                       | Hrvatski zavod za javno zdravstvo                                                                                                                   |                                                                                                                                                                                                                                                                                                                                                                                                                                                                                                                                                                                                                                                                          | Irena Tabain; Ivana Ferenčak                                                                                                                                                                                                                                                              |  |
| EPI_ISL_2894986, EPI_ISL_2894995, EPI_ISL_2894996                                                                                                                                                                                                                                                                                                                                   | National Agency for Public Health, Republic of Moldova                                              | Charité Universitätsmedizin Berlin, Institut für Virologie                                                                                          | Ala Halacu; Barbara Mühlemann; Christian Drosten; Julia Schneider; Julia Tesch; Jörn Beheim-Schwarzbach; Mariana Apostol; Talitha Veith; Terry Jones; Tobias Bleicker; Victor M Corman                                                                                                                                                                                                                                                                                                                                                                                                                                                                                   |                                                                                                                                                                                                                                                                                           |  |
| EPI_ISL_1805717, EPI_ISL_1805741                                                                                                                                                                                                                                                                                                                                                    | National Center for Communicable Diseases (NCCD) National Influenza Center                          | National Center for Communicable Diseases (NCCD) National Influenza Center                                                                          | Ankhabayar S; Battur L; Bayasgalan N; Darmaa B; Hideka M; Khishigmunkh Ch; Mina N; Naranzul Ts; Nymadawa P; Seichiro F; Shinji W; Tsozolmaa G                                                                                                                                                                                                                                                                                                                                                                                                                                                                                                                            |                                                                                                                                                                                                                                                                                           |  |
| EPI_ISL_1854607, EPI_ISL_1854627, EPI_ISL_1854638                                                                                                                                                                                                                                                                                                                                   | National Center of Disease Control and Prevention of the Republic of Armenia                        | UW Virology Lab                                                                                                                                     | Alexander Greninger; Anahit Hovhannisyan; Andranik Chavushyan; Anna Khazaryan; Arsen Arakelyan; Diana Avetyan; Gisane Khachatyan; Hong Xie; Hovsep Ghazaryan; Keith R. Jerome; Lasata Shrestha; Lyudmila Niazyan; Maria Nikoghosyan; Meei-Li Huang; Michelle Lin; Nelli Muradyan; Pavitra Roychoudhury; Roksana Zakharyan; Shah Mohamed Bakhash; Siras Hakobyan; Tamara Sirunyan                                                                                                                                                                                                                                                                                         |                                                                                                                                                                                                                                                                                           |  |
| EPI_ISL_2081896, EPI_ISL_2081933, EPI_ISL_2081937, EPI_ISL_2081938, EPI_ISL_2180426, EPI_ISL_2379231, EPI_ISL_2841982, EPI_ISL_2841983                                                                                                                                                                                                                                              |                                                                                                     |                                                                                                                                                     |                                                                                                                                                                                                                                                                                                                                                                                                                                                                                                                                                                                                                                                                          |                                                                                                                                                                                                                                                                                           |  |
| see above                                                                                                                                                                                                                                                                                                                                                                           | National Center of Infectious and Parasitic Diseases                                                | National Center of Infectious and Parasitic Diseases                                                                                                | Alexiev; Alexiev et al; Dimitrova; Dobrinov; Donchev; Grigorova I.; Grigorova L.; Hristova; Ivanov; Kantardjiev; Korsun; Philipova; Stoitsova; Stoykov; Trifonova                                                                                                                                                                                                                                                                                                                                                                                                                                                                                                        |                                                                                                                                                                                                                                                                                           |  |
| EPI_ISL_2458825, EPI_ISL_2461515, EPI_ISL_2461706, EPI_ISL_2556860                                                                                                                                                                                                                                                                                                                  | National Centre for Disease Control (NCDC) Biotechnology Division, Delhi                            | NCDC Delhi, Biotechnology Division INSACOG                                                                                                          | Hema Gogia; Hemlata Lall; Kalaiarasan Ponnusamy; Mahesh S Dhar; Manoj K Singh; Meena Datta; Partha Rakshit; Preeti Madan; Priyanka Singh; Radhakrishnan V. S; Robin Marwal; Sandhya Kabra; Sujeet K Singh; Uma Sharma                                                                                                                                                                                                                                                                                                                                                                                                                                                    |                                                                                                                                                                                                                                                                                           |  |
| EPI_ISL_2492631, EPI_ISL_2492664, EPI_ISL_2492734, EPI_ISL_2493030, EPI_ISL_2493031, EPI_ISL_2493032, EPI_ISL_2493034, EPI_ISL_2493035, EPI_ISL_2493068, EPI_ISL_2493069                                                                                                                                                                                                            |                                                                                                     |                                                                                                                                                     |                                                                                                                                                                                                                                                                                                                                                                                                                                                                                                                                                                                                                                                                          |                                                                                                                                                                                                                                                                                           |  |
| see above                                                                                                                                                                                                                                                                                                                                                                           | National HIV Reference Laboratory, Ministry of Health, Public Health Institute of Malawi            | CERI, Centre for Epidemic Response and Innovation, Stellenbosch University and KRISP, KZN Research Innovation and Sequencing Platform, UKZN.        | Auld A; Chilima B; Chiwaula M; Emmanuel SJ; Giandhari J; Kaba M; Kampira E; Kasambara W; Kim L; Lessells R; Maida A; Mvula B; Mwangomba W; Naidoo Y; Panja L; Pillay S; Tegally H; Wadonda N; Wilkinson E; de Oliveira T                                                                                                                                                                                                                                                                                                                                                                                                                                                 |                                                                                                                                                                                                                                                                                           |  |
| EPI_ISL_1407101, EPI_ISL_1407121, EPI_ISL_1407217, EPI_ISL_2494782, EPI_ISL_2494822, EPI_ISL_2494830, EPI_ISL_2494899, EPI_ISL_2494924, EPI_ISL_2494937, EPI_ISL_2494966, EPI_ISL_2494972, EPI_ISL_2609589, EPI_ISL_2609596                                                                                                                                                         |                                                                                                     |                                                                                                                                                     |                                                                                                                                                                                                                                                                                                                                                                                                                                                                                                                                                                                                                                                                          |                                                                                                                                                                                                                                                                                           |  |
| see above                                                                                                                                                                                                                                                                                                                                                                           | National HIV Reference Laboratory, Ministry of Health, Public Health Institute of Malawi            | KRISP, KZN Research Innovation and Sequencing Platform                                                                                              | Auld A; Chilima B; Chiwaula M; Emmanuel SJ; Giandhari J; Kaba M; Kampira E; Kasambara W; Kim L; Lessells R; Maida A; Mvula B; Mwangomba W; Naidoo Y; Panja L; Pillay S; Tegally H; Wadonda N; Wilkinson E; de Oliveira T                                                                                                                                                                                                                                                                                                                                                                                                                                                 |                                                                                                                                                                                                                                                                                           |  |
| EPI_ISL_1677720, EPI_ISL_560386                                                                                                                                                                                                                                                                                                                                                     | National Health Laboratory                                                                          | Botswana Institute for Technology Research and Innovation                                                                                           | Dineo Emang Tshiamo. Tefelo Thela; Gape Nyepetsi; Kefentse Arnold Tumedí; Madisa Mine; Maitshwarelo Ignatius Matsheka; Malebogo Kebabonye; Thongbotho Mphoyakgosi                                                                                                                                                                                                                                                                                                                                                                                                                                                                                                        |                                                                                                                                                                                                                                                                                           |  |
| EPI_ISL_622987                                                                                                                                                                                                                                                                                                                                                                      | National Health Laboratory Service                                                                  | Botswana Institute for Technology Research and Innovation<br>National Institute for Communicable Diseases of the National Health Laboratory Service | Dineo Emang Tshiamo. Gape Nyepetsi; Kefentse Arnold Tumedí; Madisa Mine; Maitshwarelo Ignatius Matsheka; Thongbotho Mphoyakgosi<br>Allam M; Bhiman JN; Ismail A; Khumalo Z; Kwenda S; Mnyameni F; Mohale T; Mtshali P; Subramoney K                                                                                                                                                                                                                                                                                                                                                                                                                                      |                                                                                                                                                                                                                                                                                           |  |
| EPI_ISL_1550938                                                                                                                                                                                                                                                                                                                                                                     | National Health Laboratory Service,                                                                 | KRISP, KZN Research Innovation and Sequencing Platform                                                                                              | Emmanuel SJ; Giandhari J; Khan S; Lessells R; Mdlalose K; Naidoo Y; Pillay S; Ramphal U; Tegally H; Wilkinson E; York D; de Oliveira T                                                                                                                                                                                                                                                                                                                                                                                                                                                                                                                                   |                                                                                                                                                                                                                                                                                           |  |

|                                                                                                                                                                                                                             |                                                                                                                                                                                                                                                                                |                                                                                                                                                                                                  |                                                                                                                                                                                                                                                                                                                                                                                                                                                                                                                                                                                                                                                                                                                                                                                                                                                                                                                                                                                                        |
|-----------------------------------------------------------------------------------------------------------------------------------------------------------------------------------------------------------------------------|--------------------------------------------------------------------------------------------------------------------------------------------------------------------------------------------------------------------------------------------------------------------------------|--------------------------------------------------------------------------------------------------------------------------------------------------------------------------------------------------|--------------------------------------------------------------------------------------------------------------------------------------------------------------------------------------------------------------------------------------------------------------------------------------------------------------------------------------------------------------------------------------------------------------------------------------------------------------------------------------------------------------------------------------------------------------------------------------------------------------------------------------------------------------------------------------------------------------------------------------------------------------------------------------------------------------------------------------------------------------------------------------------------------------------------------------------------------------------------------------------------------|
| EPI_ISL_2086237                                                                                                                                                                                                             | South Africa                                                                                                                                                                                                                                                                   |                                                                                                                                                                                                  |                                                                                                                                                                                                                                                                                                                                                                                                                                                                                                                                                                                                                                                                                                                                                                                                                                                                                                                                                                                                        |
| EPI_ISL_1371929                                                                                                                                                                                                             | EPI_ISL_2617186, EPI_ISL_2617188, EPI_ISL_2617189, EPI_ISL_2617191, EPI_ISL_2617204, EPI_ISL_2617205, EPI_ISL_2617208, EPI_ISL_2617210, EPI_ISL_2617213, EPI_ISL_2617216, EPI_ISL_2688535, EPI_ISL_2688544, EPI_ISL_2688550, EPI_ISL_2688552, EPI_ISL_2688553, EPI_ISL_2688571 | KRISP, KZn Research Innovation and Sequencing Platform                                                                                                                                           | Emmanuel SJ; Giandhari J; Giandhari Jennifer; Khan S; Lessells R; Maslo C; Mdlalose K; Naidoo Yeshnee; Pillay S; Pillay Sureshnee; San James; Sitharam L; Tegally H; Tegally Houriyah; Tshabula Derek; Wilkinson E; Wilkinson Eduan; Yajna Ramphal; York D; de Oliveira T; de Oliveira Tulo                                                                                                                                                                                                                                                                                                                                                                                                                                                                                                                                                                                                                                                                                                            |
| see above                                                                                                                                                                                                                   | National Health Laboratory Service, South Africa                                                                                                                                                                                                                               |                                                                                                                                                                                                  |                                                                                                                                                                                                                                                                                                                                                                                                                                                                                                                                                                                                                                                                                                                                                                                                                                                                                                                                                                                                        |
| EPI_ISL_3252976, EPI_ISL_3252978                                                                                                                                                                                            | National Health Laboratory, Ministry Of Health And Sports, The Republic Of The Union Of Myanmar                                                                                                                                                                                | Pathogen Genomics Center, National Institute of Infectious Diseases                                                                                                                              | Eh Htoo Pe; Htay Htay Tin; Kentaro Itokawa; Makoto Kuroda; Masanori Hashino; Reiko Saito; Rina Tanaka; Tsuyoshi Sekizuka; Wint Wint Phyu                                                                                                                                                                                                                                                                                                                                                                                                                                                                                                                                                                                                                                                                                                                                                                                                                                                               |
| EPI_ISL_456600                                                                                                                                                                                                              | National Health Laboratory, Timor-Leste                                                                                                                                                                                                                                        | Microbiological Diagnostic Unit Public Health Laboratory, The Peter Doherty Institute for Infection and Immunity                                                                                 | Antonia da Costa, E.; Baird, R.; Barreto, I.; Caly, L.; Canisia, D.; Dakh, F.; Dolores de Jesus da Costa, M.; Douglas, N.; Francis, J.; Freeman, K.; Jayanti Pereira Tilman, A.; Marr, I.; Sait, M.; Salles de Sousa, A.; Schultz, M.; Seemann, T.; Sherry, N.; Soares da Silva, E.; Wapling, J.; Ximenes, J.                                                                                                                                                                                                                                                                                                                                                                                                                                                                                                                                                                                                                                                                                          |
| EPI_ISL_770471, EPI_ISL_770474                                                                                                                                                                                              | National Health laboratory                                                                                                                                                                                                                                                     | Botswana Institute for Technology Research and Innovation                                                                                                                                        | Dineo Emang Tshiamo. Gape Nyepetsi; Kefentse Arnold Tumedji; Madisa Mine; Maitshwarelo Ignatius Matsheka; Malebogo Kebabonye; Thongbotho Mphoyakgosi                                                                                                                                                                                                                                                                                                                                                                                                                                                                                                                                                                                                                                                                                                                                                                                                                                                   |
| EPI_ISL_245494, EPI_ISL_245497, EPI_ISL_2455585                                                                                                                                                                             | National Hospital for Tropical Diseases                                                                                                                                                                                                                                        | Oxford University Clinical Research Unit, Hanoi, Vietnam                                                                                                                                         | H.Rogier van Doorn on behalf of the OUCRU COVID-19 research group; Le Van Duyet; Nguyen Thi Hong Thuong; Nguyen Thi Kim Chi; Nguyen Thi Tam; Nguyen Thu Trang; Pham Ngoc Thach; Phan Manh Cuong; Thomas Kesteman; Van Dinh Trang                                                                                                                                                                                                                                                                                                                                                                                                                                                                                                                                                                                                                                                                                                                                                                       |
| EPI_ISL_511898                                                                                                                                                                                                              | National Hospital of Tropical Diseases                                                                                                                                                                                                                                         | Oxford University Clinical Research Unit, Hanoi, Vietnam                                                                                                                                         | H. Rogier van Doorn; Le Nguyen Minh Hoa; Nguyen Thi Hong Thuong; Nguyen Thi Ngoc Diep; Nguyen Thi Tam; Nguyen Thu Trang; Pham Ngoc Thach; Van Dinh Trang; Vu Thi Ngoc Bich; on behalf of the OUCRU COVID-19 research group                                                                                                                                                                                                                                                                                                                                                                                                                                                                                                                                                                                                                                                                                                                                                                             |
| EPI_ISL_2695785                                                                                                                                                                                                             | National Influenza Center (NIC), Virology department, Institut National d'Hygiène.                                                                                                                                                                                             | National Influenza Center (NIC), Virology department, Institut National d'Hygiène.                                                                                                               | Abderrahmane BIMOUHEN; Hassan IHAZMAD; Hicham OUMZIL; Samira BENKERROUM; Zakia REGRAGUI; fatima EL FALAKI and Mohamed RHAJAOU                                                                                                                                                                                                                                                                                                                                                                                                                                                                                                                                                                                                                                                                                                                                                                                                                                                                          |
| EPI_ISL_862077, EPI_ISL_862078                                                                                                                                                                                              | National Influenza Center, Virology Department                                                                                                                                                                                                                                 | National Influenza Center                                                                                                                                                                        | A Nejati; F Ajaminejad and T Mokhtari Azad; J Yavarian; K Sadeghi; N Ghavvami; NZ Shafiei Jandaghi; V Salimi                                                                                                                                                                                                                                                                                                                                                                                                                                                                                                                                                                                                                                                                                                                                                                                                                                                                                           |
| EPI_ISL_2285856, EPI_ISL_2285858, EPI_ISL_2285859, EPI_ISL_2285860, EPI_ISL_2285865, EPI_ISL_2285866, EPI_ISL_2535784, EPI_ISL_2535825, EPI_ISL_2873861, EPI_ISL_2873862, EPI_ISL_2873869, EPI_ISL_2873870, EPI_ISL_2873872 | see above                                                                                                                                                                                                                                                                      | National Influenza Centre                                                                                                                                                                        | ; Benjamin B. Lindsey; Benjamin H. Foulkes; Dennis Laryea; Ernest Asiedu; Franklin Asiedu-Bekoe; Gordon Awandare; Ivy A. Asante; Joseph Oliver-Commye; Joyce Ngoi; Linda Boatema; Loreta Kwah; Mathew D. Parker; Michael Marks; Mildred Adusei-Poku; Sharon Hsu; Thushan I de Silva; William K. Ampofo Maria Christoforidi                                                                                                                                                                                                                                                                                                                                                                                                                                                                                                                                                                                                                                                                             |
| EPI_ISL_476838                                                                                                                                                                                                              | National Influenza Centre for Northern Greece                                                                                                                                                                                                                                  | National Influenza Centre for Northern Greece                                                                                                                                                    |                                                                                                                                                                                                                                                                                                                                                                                                                                                                                                                                                                                                                                                                                                                                                                                                                                                                                                                                                                                                        |
| EPI_ISL_410301                                                                                                                                                                                                              | National Influenza Centre, National Public Health Laboratory, Kathmandu, Nepal                                                                                                                                                                                                 | The University of Hong Kong                                                                                                                                                                      | Alfonso J. Rodriguez-Morales; Anup Bastola; Basu Dev Pandey; Bibek Kumar Lal; Daniel Chu; Haoguo Gu; Leo Poon; Malik Peiris; Ranjit Sah; Runa Jha                                                                                                                                                                                                                                                                                                                                                                                                                                                                                                                                                                                                                                                                                                                                                                                                                                                      |
| EPI_ISL_402125                                                                                                                                                                                                              | National Institute for Communicable Disease Control and Prevention (ICDC) Chinese Center for Disease Control and Prevention (China CDC)                                                                                                                                        | National Institute for Communicable Disease Control and Prevention (ICDC) Chinese Center for Disease Control and Prevention (China CDC)                                                          | Chen; Dai; F.-H.; Hu, Y.; J.-H.; J.-J.; J.-L. and Zhu; Liu, Y.; Pei; Q.-M.; She; Song; T.-Y.; Tao; Tian; Wang; Wang, W.; Wu, F.; Xu, L.; Y.-L.; Y.-M.; Y.-Y.; Y.-Z.; Yu, B.; Z.-G.; Z.-W.; Zhang; Zhao, S.; Zheng                                                                                                                                                                                                                                                                                                                                                                                                                                                                                                                                                                                                                                                                                                                                                                                      |
| EPI_ISL_430297                                                                                                                                                                                                              | see above                                                                                                                                                                                                                                                                      | National Institute for Communicable Diseases of the National Health Laboratory Service                                                                                                           | A; Allam M; Amoako DG; Bhiman JN; Everatt J; Ismail A; Khumalo Z; Kwenda S; Mahlangu B; Mnguni A; Mnyameni F; Mohale T; Mtshali P; Ntuli N; Scheepers C; Subramoney K; van Heusden P; von Gottberg                                                                                                                                                                                                                                                                                                                                                                                                                                                                                                                                                                                                                                                                                                                                                                                                     |
| EPI_ISL_1914915, EPI_ISL_1914931, EPI_ISL_1914936                                                                                                                                                                           | National Institute for Communicable Diseases, National Health Laboratory Services, Gauteng, South Africa                                                                                                                                                                       | National Institute for Communicable Diseases of the National Health Laboratory Service                                                                                                           | Amoako DG; Bhiman JN; Ismail A; Mahlangu B; Mohale T; Ntuli N; Scheepers C                                                                                                                                                                                                                                                                                                                                                                                                                                                                                                                                                                                                                                                                                                                                                                                                                                                                                                                             |
| EPI_ISL_498693, EPI_ISL_591270, EPI_ISL_850947, EPI_ISL_2170894                                                                                                                                                             | National Institute for Viral Disease Control and Prevention, China CDC                                                                                                                                                                                                         | National Institute for Viral Disease Control and Prevention, China CDC                                                                                                                           | ; 10; 4&; 7; Baoying Huang3; Cao Chen; Cao Chen3&; Dayan Wang; Dayan Wang3; Dongyan Wang3; Fengqin Li6; George F.Gao; George Fu Gao1; Haibo Sun5; Hong Wang; Hong Wang3; Huilai Ma; Huilai Ma1&; Ji Wang; Ji Wang3&; Jian Cai1; Jianqun Zhang2&; Jianxing Yu1; Jingdong Song; Jun Han; Jun Meng2; Kai Nie; Li Bai6; Li Zhao3; Liang Wang1; Lingling Mao; Lingling Mao5; Mingchun Luan2; Naiying Mao3; Ning Lie; Peihua Niu3; Qian Yang3; Ruqin Gao; Shaofeng Jiang9; Shihong Yang2; Shiwen Wang; Shuangli Zhu3; Tao Ma1; Tianjiao Ji3; Wei Yao2*;; Weimin Zhou; WenQing Yao , Wenbo Xu; Wenbo Xu; Wenbo Xu3*;; Wenjie Tan; Wenjie Tan3; Wenqing Yao5*;; Xiang Ren1; Xiang Zhao; Xiang Zhao3; Yan Zhang3; Yang Song; Yang Song3&; Yanhai Wang; Yanhai Wang3; Yao Meng; Ye Cheng Yao11; Yenan Feng; Ying Qin1&; Yingwei Sun5; Yong Zhang; Yong Zhang3; Yong Zhang , Bo Zhijian , Jianqun Zhang; Yuchao Wu; Yunting Xia8; Zhaoguo Wang; Zhen Zhu3; Zhijian Bo2; Zhixiao Chen; Zhongjie Li1; Zijian Feng1* |
| EPI_ISL_2107094, EPI_ISL_2107095, EPI_ISL_2107097, EPI_ISL_2107101                                                                                                                                                          | National Institute of Health (NIH) - Federal Government of Somalia                                                                                                                                                                                                             | African Centre of Excellence for Genomics of Infectious Diseases (ACEGID), Redeemer's University                                                                                                 | A.T.; Abechi; Ajogbasile; Akano; C.A.; C.T.; Eromon; F.V.; Folarin, O.; Happi; I.B.; J.N.; J.U.; K.O.; Kayode; Nosamiefan, I.; Oguzie; Olawoye; Olumade; Oluniyi; P.E.; P.S.; T.J.; Ugwu; Uwanibe                                                                                                                                                                                                                                                                                                                                                                                                                                                                                                                                                                                                                                                                                                                                                                                                      |
| EPI_ISL_833130                                                                                                                                                                                                              | National Institute of Health Research and Development                                                                                                                                                                                                                          | National Institute of Health Research and Development                                                                                                                                            | A; AA; Adam; Agustini; F; Febriyani; Febriyanti; HA; HD; Hariastuti; Herman; Herna; IL; Ikawati; Indalao; J; K; KD; KNA; Kipuw; Kurniawati; Muna; Mursinah; NI; NI; NK; NL; Nikmah; Nugraha; Pangesti; Pawestri; Puspita; Puspandari; R; Ramadhany; Rizki; Rukmiyati; Setiawaty; Soekarso; Subangkit; Susanti; Susilairini; T; UA; V; Wibowo; Y                                                                                                                                                                                                                                                                                                                                                                                                                                                                                                                                                                                                                                                        |
| EPI_ISL_1279947, EPI_ISL_2099853                                                                                                                                                                                            | National Institute of Infectious Diseases-Prof. Dr. Matei Bals Molecular Diagnostics Laboratory                                                                                                                                                                                | National Institute of Infectious Diseases-Prof. Dr. Matei Bals Molecular Diagnostics Laboratory                                                                                                  | Andreea Tudor; Corina Casangiu; Dan Otelea; Leontina Banica; Marius Surleac; Ovidiu Vlaicu; Petre Milu; Simona Paraschiv                                                                                                                                                                                                                                                                                                                                                                                                                                                                                                                                                                                                                                                                                                                                                                                                                                                                               |
| EPI_ISL_943561                                                                                                                                                                                                              | National Institute of Laboratory Medicine and Referral Center                                                                                                                                                                                                                  | Genomic Research Lab, BCSIR                                                                                                                                                                      | A. K. M. Shamsuzzaman; Abu Sayeed Mohammad Mahmud; Arifa Akram; Asish Kumar Ghosh; Barna Goswami; Eshrar Osman; Iffat Jahan; Mahmuda Yeasmin; Md. Ahasan Habib; Md. Maruf Ahmed Molla; Md. Mushed Hasan Sarkar; Md. Saddam Hossain; Md. Salim Khan; Mohammad Samir Uzazzam; Shahina Akter; Tanjina Akhtar Banu; Tasnim Nafisa                                                                                                                                                                                                                                                                                                                                                                                                                                                                                                                                                                                                                                                                          |
| EPI_ISL_2323222, EPI_ISL_2380410                                                                                                                                                                                            | National Institute of Public Health                                                                                                                                                                                                                                            | Charles University, Faculty of Science, BIOCEV, OMICS Genomics                                                                                                                                   | Blanka Hamplová; Ingrid Poláková; Jana Šmahelová; Jiří Novák; Magdalena Jančářová; Ruth Tachezy; Sebastian Cristian Treitli; Vladimír Hampl; Zoltán Füssy; Stěpánka Hrdá                                                                                                                                                                                                                                                                                                                                                                                                                                                                                                                                                                                                                                                                                                                                                                                                                               |
| EPI_ISL_1261163, EPI_ISL_1261260                                                                                                                                                                                            | National Institute of Public Health                                                                                                                                                                                                                                            | National Reference Laboratory for Influenza and Respiratory Viruses CZE                                                                                                                          | Alexander Nagy; Dusan Trnka; Helena Jirincova; Jaromira Vecerova; Timotej Suri                                                                                                                                                                                                                                                                                                                                                                                                                                                                                                                                                                                                                                                                                                                                                                                                                                                                                                                         |
| EPI_ISL_2562079                                                                                                                                                                                                             | National Institute of Public Health                                                                                                                                                                                                                                            | State Veterinary Institute Prague                                                                                                                                                                | A; D; H; J; Jirincova; Nagy; Suri; T; Trnka; Vecerova                                                                                                                                                                                                                                                                                                                                                                                                                                                                                                                                                                                                                                                                                                                                                                                                                                                                                                                                                  |
| EPI_ISL_1659614                                                                                                                                                                                                             | National Institute of Public Health - National Institute of Hygiene                                                                                                                                                                                                            | 1. Academic Center for Pathomorphological and Genetic-Molecular Diagnostics Ltd, Białystok, Poland 2. National Institute of Public Health - National Institute of Hygiene, Warsaw, Poland        | Anetta Sulewska; Jacek Nikliński; Janusz Dzięcioł; Joanna Kisłuk; Katarzyna Zacharczuk; Konrad Raczkowski; Magdalena Nowakowska; Malgorzata Sadkowska-Todys; Piotr Karabowicz; Piotr Majewski; Przemysław Bieček; Joanna Reszczyk; Radosław Charkiewicz; Tomasz Wolkowicz                                                                                                                                                                                                                                                                                                                                                                                                                                                                                                                                                                                                                                                                                                                              |
| EPI_ISL_2928004, EPI_ISL_2928005, EPI_ISL_2928006, EPI_ISL_2928007, EPI_ISL_2928008, EPI_ISL_2928009, EPI_ISL_2928010, EPI_ISL_2928011, EPI_ISL_2928012                                                                     | see above                                                                                                                                                                                                                                                                      | National Institute of Public Health, Bujumbura, Burundi, MRC/UVRI & LSHTM Uganda Research Unit                                                                                                   | Alexis Niyomwungere; Anatole Nkeshimana; Dan Lule Bugembe; Deogratius Ssemwanga; Jerome Nkurunziza; Léopold Ouedraogo; Matthew Cotten; My V.T. Phan; Pontiano Kaleebu                                                                                                                                                                                                                                                                                                                                                                                                                                                                                                                                                                                                                                                                                                                                                                                                                                  |
| EPI_ISL_431833                                                                                                                                                                                                              | National Institutes of Health, University of the Philippines Manila                                                                                                                                                                                                            | Philippine Genome Center, University of the Philippines System                                                                                                                                   | Alessandra C. Sanchez; Benedict A. Maralit; Bernard Demot; Carlo M. Lapid; Christina Tan; El King D. Morado; Eva Maria Cutiongco-de la Paz; Francis A. Tablizo; Haifa L.Gaza; Jan Michael C. Yap; Jarvin E. Nipales; Jo-Hannah S. Llames; John Mark Velasco; Joshua Gregor A. Dizon; Joy Ann Petronio-Santos; Julius Aaron Mejia; Kris P. Punayan; Kristianne Arielle D. Gabriel; Maribell Dollete; Marissa M. Alejandria; Raul V. Destura; Shana F. Genavia; Shebna Rose D. Fabilloren; Shiela Mae M. Araiza; Sonia Salamat; and Cynthia P. Saloma                                                                                                                                                                                                                                                                                                                                                                                                                                                    |
| EPI_ISL_1335479                                                                                                                                                                                                             | National Laboratory for Health, Environment and Food, OMM, Celje                                                                                                                                                                                                               | CISLD (Clinical Institute of Special Laboratory Diagnostics), University Children's Hospital, University Medical Center Ljubljana                                                                | Ana Grom; Barbara Jenko Bizjan; Jernej Kovač; Katarina Kozmos; Marko Pokorn; Maruša Debeljak; Robert Šket; Tadej Battelino; Tine Tesovnik                                                                                                                                                                                                                                                                                                                                                                                                                                                                                                                                                                                                                                                                                                                                                                                                                                                              |
| EPI_ISL_2001884, EPI_ISL_2273281                                                                                                                                                                                            | National Laboratory for Health, Environment and Food, OMM, Celje                                                                                                                                                                                                               | NLZOH (National Laboratory for Health, Environment and Food) / CISLD (Clinical Institute of Special Laboratory Diagnostics), University Children's Hospital, University Medical Center Ljubljana | Aleksander Kocuvan; Aleksander Mahnic; Alenka Štorman; Ana Grom; Barbara Jenko Bizjan; Daša Kavka / Jernej Kovač; Kaja Tominc; Katarina Kozmos; Maja Rupnik; Marko Pokorn; Maruša Debeljak; Mateja Borinc; Maša Jarčič; Nika Gobec; Robert Šket; Sandra Janežic; Tadej Battelino; Tine Tesovnik; Tjasa Zohar Čretnik                                                                                                                                                                                                                                                                                                                                                                                                                                                                                                                                                                                                                                                                                   |
| EPI_ISL_2162562, EPI_ISL_2789193, EPI_ISL_3316531                                                                                                                                                                           | National Laboratory for Health, Environment and Food, OMM, Maribor                                                                                                                                                                                                             | NLZOH (National Laboratory for Health, Environment and Food) / CISLD (Clinical Institute of Special Laboratory Diagnostics), University Children's Hospital, University Medical Center Ljubljana | Aleksander Kocuvan; Aleksander Mahnic; Alenka Štorman; Ana Grom; Andrej Golle / Jernej Kovač; Barbara Jenko Bizjan; Kaja Tominc; Katarina Kozmos; Maja Rupnik; Marko Pokorn; Maruša Debeljak; Maša Jarčič; Mojca Cimerman; Nika Gobec; Nika Volmajer; Robert Šket; Sandra Janežic; Tadej Battelino; Tine Tesovnik; Tjasa Zohar Čretnik; Tjasa Zohar Čretnik                                                                                                                                                                                                                                                                                                                                                                                                                                                                                                                                                                                                                                            |
| EPI_ISL_512639                                                                                                                                                                                                              | National Laboratory for Influenza/Virology reference laboratory, Public Health Center of the Ministry of Health of Ukraine                                                                                                                                                     | Respiratory Virus Unit, Microbiology Services Colindale, Public Health England                                                                                                                   | Dr. Iryna Demchysyna; PHE Covid Sequencing Team                                                                                                                                                                                                                                                                                                                                                                                                                                                                                                                                                                                                                                                                                                                                                                                                                                                                                                                                                        |
| EPI_ISL_647971, EPI_ISL_647980, EPI_ISL_1191826, EPI_ISL_1191831, EPI_ISL_1191833, EPI_ISL_1191834                                                                                                                          | National Microbiology Reference Laboratory                                                                                                                                                                                                                                     | Quadram Institute Bioscience                                                                                                                                                                     | Agnes Juru; Alexander Goredema; Ana-Victoria Gutierrez; Andrew J. Page; Andrew Tarupuiwa; Barbra Murwira; Beuty Makamure; Charles Nyagupe; David Baker; Faustinos T Takawira; Gaetan Thilliez; Gemma Kay; Gibson Mhlanga; Hlanai Gumbo; Isaac Phiri; Justin O'Grady; Kenneth K Maeka; Leonardo de Oliveira Martins; Muchaneta Mugabe; Portia Manangazira; Raiva Simbi; Robert Kingsley; Sekesai Zinyowera; Tapfumanei Mashe; Tatenda Takawira; Thanh Le Viet                                                                                                                                                                                                                                                                                                                                                                                                                                                                                                                                           |
| EPI_ISL_2492565, EPI_ISL_2492706, EPI_ISL_2492913                                                                                                                                                                           | National Microbiology Reference Laboratory, Ministry of Health, Harare, Zimbabwe                                                                                                                                                                                               | CERI, Centre for Epidemic Response and Innovation, Stellenbosch University and KRISP, KZN Research Innovation and Sequencing Platform, UKZN.                                                     | Agnes Juru; Air Comodor Dr J. Chimedza; Charles Nyagupe; Dr Raiva Simbi; Emmanuel SJ; Giandhari J; Hlanai Gumbo; Kenneth Maeka; Naidoo Y; Pillay S; Tapfumanei Mashe; Tatenda Takawira; Tegally H; Wilkinson E; de Oliveira T                                                                                                                                                                                                                                                                                                                                                                                                                                                                                                                                                                                                                                                                                                                                                                          |
| EPI_ISL_1095620                                                                                                                                                                                                             | National Public Health Center, COVID                                                                                                                                                                                                                                           | National Public Health Center, National Biosafety Laboratory                                                                                                                                     | Bernadett Pályi; Dániel Déri; Judit Henczkó; Norbert Solymosi; Nóra Magyar; Zoltán Kis                                                                                                                                                                                                                                                                                                                                                                                                                                                                                                                                                                                                                                                                                                                                                                                                                                                                                                                 |

|                                                                                                                                                                                                                                                                                                                                                                                 |                                                                                                    |                                                                                                                            |                                                                                                                                                                                                                                                                                                                       |
|---------------------------------------------------------------------------------------------------------------------------------------------------------------------------------------------------------------------------------------------------------------------------------------------------------------------------------------------------------------------------------|----------------------------------------------------------------------------------------------------|----------------------------------------------------------------------------------------------------------------------------|-----------------------------------------------------------------------------------------------------------------------------------------------------------------------------------------------------------------------------------------------------------------------------------------------------------------------|
| EPI_ISL_2479957, EPI_ISL_2479975, EPI_ISL_2479985                                                                                                                                                                                                                                                                                                                               | National Public Health Laboratory                                                                  | CSIR-Institute of Genomics and Integrative Biology                                                                         | Jyoti Acharya; Lokbandhu Chaudhary; Priya Jha; Runa Jha; Suni Dangol                                                                                                                                                                                                                                                  |
| EPI_ISL_3235116, EPI_ISL_3235120, EPI_ISL_3235155                                                                                                                                                                                                                                                                                                                               | National Public Health Laboratory                                                                  | Laboratory of Respiratory Viruses and Measles, Oswaldo Cruz Institute, FIOCRUZ                                             | Alice Sampaio Rocha; Ana Carolina Mendonca; Anna Carolina Paixao; Elisa Cavalcante Pereira; Fernando Motta; Luciana Appolinario; Marilda Siqueira on behalf of the Fiocruz COVID-19 Genomic Surveillance Network; Michelle Hamilton; Paola Resende; Renata Serrano Lopes; Taina Venas                                 |
| EPI_ISL_845546, EPI_ISL_845548, EPI_ISL_845549, EPI_ISL_845550, EPI_ISL_845551                                                                                                                                                                                                                                                                                                  | National Public Health Laboratory, Cameroon                                                        | African Centre of Excellence for Genomics of Infectious Diseases (ACEGID), Redeemer's University                           | Oluniyi P.E. et al                                                                                                                                                                                                                                                                                                    |
| EPI_ISL_2450770                                                                                                                                                                                                                                                                                                                                                                 | National Public Health Laboratory, Ministry of Health, Ministry of Health, Republic of South Sudan | South Sudan Ministry of Health, WHO South Sudan, MRC/UVRI & LSHTM Uganda Research Unit                                     | Abe G. Abias; Dan Lule Bugembe; Dennis Kenyi Lodiongo; James Ayei; John Rumunu; Joseph Francis Wamala; Juma John HM; Lul Lojok Deng; Matthew Cotten; My V.T. Phan; Pontiano Kaleebu; Richard Lino Loro Lako; Sudhir Bunga                                                                                             |
| EPI_ISL_536435, EPI_ISL_626631, EPI_ISL_825065, EPI_ISL_1098834, EPI_ISL_1719887, EPI_ISL_2349711, EPI_ISL_2508703, EPI_ISL_2508995, EPI_ISL_2509024                                                                                                                                                                                                                            | see above                                                                                          | National Public Health Laboratory, National Centre for Infectious Diseases                                                 | Cui L; Grace Jie Yin Ngan; Lin Cui; Lin RTP; Mak TM; Octavia S; Raymond Tzer Pin Lin; Royce Ang; Sophie Octavia; Tze Minn Mak; Zhenyang Zhou; Zhou Z                                                                                                                                                                  |
| EPI_ISL_2674076, EPI_ISL_2674077                                                                                                                                                                                                                                                                                                                                                | National Public Health Laboratory/Lumbini Provincial Hospital COVID 19 PCR Lab                     | National Public Health Laboratory/CSIR-Institute of Genomics and Integrative Biology                                       | National Public Health Laboratory Team /Lumbini Provincial Hospital COVID 19 PCR Lab Team; National Public Health Laboratory Team /Lumbini Provincial Hospital COVID 19 PCR Lab Team                                                                                                                                  |
| EPI_ISL_2674112                                                                                                                                                                                                                                                                                                                                                                 | National Public Health Laboratory/Nepal Medical College & Teaching Hospital                        | National Public Health Laboratory/CSIR-Institute of Genomics and Integrative Biology                                       | National Public Health Laboratory Team/Nepal Medical College & Teaching Hospital COVID 19 PCR Team                                                                                                                                                                                                                    |
| EPI_ISL_2095982                                                                                                                                                                                                                                                                                                                                                                 | National Public Health Surveillance Laboratory                                                     | National Public Health Surveillance Laboratory                                                                             | Ana Steponkiene; Danas Baksa; Jelena Razmuk; Lukas Vasionis; Lukas Zemaitis; Migle Gabrielaite; Svajune Muralyte                                                                                                                                                                                                      |
| EPI_ISL_1273399, EPI_ISL_1273406, EPI_ISL_1273407, EPI_ISL_1273408                                                                                                                                                                                                                                                                                                              | National Reference Laboratory - Ministry of Health Maseru Lesotho                                  | National Institute for Communicable Diseases of the National Health Laboratory Service                                     | Amoako DG; Banda R; Bhiman JN; Gorova V; Ismail A; Mahlangu B; Mathabo M; Mohale T; Mooko M; Ntuli N; Scheepers C                                                                                                                                                                                                     |
| EPI_ISL_1073135                                                                                                                                                                                                                                                                                                                                                                 | National Reference Laboratory, Nigeria Centre for Disease Control.                                 | National Reference Laboratory, Nigeria Centre for Disease Control, Gaduwa, Abuja, Nigeria                                  | Anthony Ahumibe; Chimaobi Chukwu; Dr Chikwe Ihekweazu; Dr Ndodo Nnaemeka; Dr Omoare Adesuyi; Esebanmen Grace; Naidoo Dhamari; Nwando Mba; Olusola Anuoluwapo Akanbi                                                                                                                                                   |
| EPI_ISL_962878                                                                                                                                                                                                                                                                                                                                                                  | National Virology Reference Laboratory                                                             | National Public Health Laboratory, National Centre for Infectious Diseases                                                 | Lin Cui; Raymond Tzer Pin Lin; Taib Surita; Tze Minn Mak; Zaini Zainun; Zhenyang Zhou                                                                                                                                                                                                                                 |
| EPI_ISL_671343                                                                                                                                                                                                                                                                                                                                                                  | National Virus Reference Laboratory                                                                | Irish Coronavirus Sequencing Consortium - Teagasc Moorepark                                                                | Calm Walsh; Genuity Ireland                                                                                                                                                                                                                                                                                           |
| EPI_ISL_501261, EPI_ISL_528457, EPI_ISL_578311, EPI_ISL_959873, EPI_ISL_1118873, EPI_ISL_1181883, EPI_ISL_1499737, EPI_ISL_1696521, EPI_ISL_1785368, EPI_ISL_1791226, EPI_ISL_1891394, EPI_ISL_2240830, EPI_ISL_2612906                                                                                                                                                         | see above                                                                                          | National Virus Reference Laboratory                                                                                        | Calum Walsh; Charlene Bennet; Charlene Bennett; Cillian F De Gascun; Fiona Crispie; Gabriel Gonzalez; Guerrino Macori; Jonathan Dean; Matthew McCabe; Michael Carr; Paul Cotter; Seamus Fanning; Suzie Coughlan; Zoe Yandle                                                                                           |
| EPI_ISL_770475                                                                                                                                                                                                                                                                                                                                                                  | National health Laboratory                                                                         | Botswana Institute for Technology Research and Innovation                                                                  | Dineo Emang Tshiamo, Gape Nyepetsi; Kefentse Arnold Tumed; Madisa Mine; Maitshwarelo Ignatius Matsheka; Malebogo Keabonye; Thongbotho Mphoyakgosi                                                                                                                                                                     |
| EPI_ISL_2533882, EPI_ISL_2858619                                                                                                                                                                                                                                                                                                                                                | Naval Medical Research Unit No. 3                                                                  | Naval Medical Research Centre Biological Defense Research Directorate                                                      | Andrea E. Luquette; Andrew J. Bennett; Bishwo N. Adhikari; Catherine E. Arnold; Chaselynn M. Watters; Emily K. Stefanov; Francisco Malagon; Kyle A. Long; Logan J. Voegtly; Luis A. Estrella; Michael V. Deschenes; Regina Z. Cer; Stephen M. Egan; and Kimberly A. Bishop-Lilly                                      |
| EPI_ISL_2501094                                                                                                                                                                                                                                                                                                                                                                 | Netcare St Augustines Hospital                                                                     | KRISP, KZN Research Innovation and Sequencing Platform                                                                     | Emmanuel SJ; Giandhari J; Khan S; Lessells R; Mdlalose K; Naidoo Y; Pillay S; Ramphal U; Sisonke Team; Tegally H; Wilkinson E; York D; de Oliveira T                                                                                                                                                                  |
| EPI_ISL_1250370                                                                                                                                                                                                                                                                                                                                                                 | Netcare/AMPATH                                                                                     | KRISP, KZN Research Innovation and Sequencing Platform                                                                     | Emmanuel SJ; Giandhari J; Khan S; Lessells R; Maslo K; Mdlalose K; Pillay S; Sitharam L; Tegally H; Wilkinson E; York D; de Oliveira T                                                                                                                                                                                |
| EPI_ISL_696489                                                                                                                                                                                                                                                                                                                                                                  | New Horizon Clinic wc NZC & NHL/UCT                                                                | KRISP, KZN Research Innovation and Sequencing Platform                                                                     | Arash Iranzadeh; Bruna Galvao; Carolyn Williamson; Deelan Doolabh; Diana Harad; Emanuel James San; Houriyah Tegally; Innocent Mudau; Jennifer Giandhari; Kruger Marais; Lynn Tyers; Marvin Hsiao; Stephen Korsman; Sureshnee Pillay; Tulio de Oliveira                                                                |
| EPI_ISL_825714, EPI_ISL_1073139, EPI_ISL_1381815                                                                                                                                                                                                                                                                                                                                | Nigeria Centre For Disease Control                                                                 | National reference Laboratory, NCDC, Gaduwa, Abuja                                                                         | Anthony Ahumibe; Catherine Okoi; Chimaobi Chukwu; Dr Chikwe Ihekweazu; Dr Ndodo Nnaemeka; Dr Omoare Adesuyi; Esebanmen Grace; Grace Esebanmen; Naidoo Dhamari; Nwando Mba; Olusola Anuoluwapo Akanbi                                                                                                                  |
| EPI_ISL_455426                                                                                                                                                                                                                                                                                                                                                                  | Nigeria Centre for Disease Control                                                                 | African Centre of Excellence for Genomics of Infectious Diseases (ACEGID), Redeemer's University, Ede, Osun State, Nigeria | Ajogbasile F.V.; Folarin O.A.; Happi C.T.; Ihekweazu C.; Kayode A.; Oguzie J.; Olawoye I.; Olumade T.; Oluniyi P.E.; Uwanibe J.                                                                                                                                                                                       |
| EPI_ISL_2565890, EPI_ISL_2565891, EPI_ISL_2565893, EPI_ISL_2565894, EPI_ISL_2565897                                                                                                                                                                                                                                                                                             | Nigeria Centre for Disease Control (NCDC)                                                          | Africa Centre for Excellence for Genomics of Infectious Diseases (ACEGID), Redeemer's University                           | A.T.; Abechi; Ajogbasile; Akano; C.A.; C.T.; Eromon; F.V.; Folarin, O.; Happi; I.B.; J.N.; J.U.; K.O.; Kayode; Nosamiefan, I.; Oguzie; Olawoye; Olumade; Oluniyi; P.E.; P.S.; T.J.; Ugwu; Uwanibe                                                                                                                     |
| EPI_ISL_1970548, EPI_ISL_1970551                                                                                                                                                                                                                                                                                                                                                | Nigeria Centre for Disease Control (NCDC)                                                          | African Centre for Excellence for Genomics of Infectious Diseases (ACEGID), Redeemer's University                          | A.T.; Abechi; Ajogbasile; Akano; C.A.; C.T.; Eromon; F.V.; Folarin, O.; Happi; I.B.; J.N.; J.U.; K.O.; Kayode; Oguzie; Olawoye; Olumade; Oluniyi; P.E.; P.S.; T.J.; Ugwu; Uwanibe                                                                                                                                     |
| EPI_ISL_872601, EPI_ISL_872610, EPI_ISL_906302, EPI_ISL_941281, EPI_ISL_941284, EPI_ISL_1242025, EPI_ISL_1242026                                                                                                                                                                                                                                                                | see above                                                                                          | African Centre of Excellence for Genomics of Infectious Diseases (ACEGID), Redeemer's University                           | Oluniyi P.E. et al                                                                                                                                                                                                                                                                                                    |
| EPI_ISL_455412, EPI_ISL_487106, EPI_ISL_487111, EPI_ISL_527875, EPI_ISL_527876, EPI_ISL_527888, EPI_ISL_527889, EPI_ISL_527891, EPI_ISL_527892, EPI_ISL_729920, EPI_ISL_729921, EPI_ISL_729923, EPI_ISL_729925, EPI_ISL_729937, EPI_ISL_729944, EPI_ISL_729960, EPI_ISL_729966, EPI_ISL_729967, EPI_ISL_729971, EPI_ISL_729979, EPI_ISL_729986, EPI_ISL_730042, EPI_ISL_730043  | see above                                                                                          | African Centre of Excellence for Genomics of Infectious Diseases (ACEGID), Redeemer's University, Ede, Osun State, Nigeria | Ajogbasile F.V.; Folarin O.A.; Happi C.T.; Ihekweazu C.; Kayode A.; Oguzie J.; Olawoye I.; Olumade T.; Oluniyi P.E.; Oluniyi P.E. et al; Uwanibe J.                                                                                                                                                                   |
| EPI_ISL_2240754, EPI_ISL_2240771                                                                                                                                                                                                                                                                                                                                                | Nigeria Centre for Disease Control (NCDC)                                                          | African Centre of Excellence for Genomics of Infectious Diseases (ACEGID), Redeemer's University                           | A.T.; Abechi; Ajogbasile; Akano; C.A.; C.T.; Eromon; F.V.; Folarin, O.; Happi; I.B.; J.N.; J.U.; K.O.; Kayode; Nosamiefan, I.; Oguzie; Olawoye; Olumade; Oluniyi; P.E.; P.S.; T.J.; Ugwu; Uwanibe                                                                                                                     |
| EPI_ISL_1235667                                                                                                                                                                                                                                                                                                                                                                 | Nigerian Centre for Disease Control (NCDC)                                                         | African Centre of Excellence for Genomics of Infectious Diseases (ACEGID), Redeemer's University                           | I.B.; Olawoye; et al                                                                                                                                                                                                                                                                                                  |
| EPI_ISL_1715386                                                                                                                                                                                                                                                                                                                                                                 | Nigerian Centre for Disease Control (NCDC)                                                         | African Centre of Excellence for Genomics of Infectious Diseases, Redeemer's University                                    | I.B. et al; Olawoye                                                                                                                                                                                                                                                                                                   |
| EPI_ISL_2361906, EPI_ISL_2376389                                                                                                                                                                                                                                                                                                                                                | Noguchi Memorial Institute for Medical Research, University of Ghana, Legon, Ghana                 | Institute of Tropical Medicine, Universitätsklinikum Tübingen, Germany                                                     | Abraham Kwabena Anang; Bright Adu; Dorothy Yeboah-Manu; Hilda Opoku Frempong; John Kofi Odoom; Joseph Humphrey Kofi Bonney; Joyce Appiah-Kubi; Keren Okyerebea Attiku; Le Thi Kieu Linh; Quaneeta Mohktar; Sivaramakrishna Rachakonda; Srinivas-reddy Pallerla; Thirumalaisamy P Velavan                              |
| EPI_ISL_2333185                                                                                                                                                                                                                                                                                                                                                                 | Norwegian Institute of Public Health, Department of Virology                                       | Norwegian Institute of Public Health, Department of Virology                                                               | Atiya R Ali; Debec Nadia; Engebretsen Serina Beate; Garcia Llorente Ignacio; Hilde Elshaug; Hilde Vollan; Jon Bråte; Kamilla Heddeland Instefjord; Karoline Bragstad; Kathrine Stene-Johansen; Line Victoria Moen; Marie Paulsen Madsen; Olav Hungnes; Pedersen Benedikte Nevjen; Rasmus Riis Kopperud                |
| EPI_ISL_934974                                                                                                                                                                                                                                                                                                                                                                  | Novabio                                                                                            | CNR Virus des Infections Respiratoires - France SUD                                                                        | Antonin Bal; Bruno Lina; Gregory Destras; Gwendolyne Burfin; Hadrien Règue; Laurence Josset; Martine Valette; Quentin Semanas                                                                                                                                                                                         |
| EPI_ISL_735437, EPI_ISL_735446                                                                                                                                                                                                                                                                                                                                                  | Nucleic Acid Testing - Rwanda National Reference Laboratory                                        | GIGA Medical Genomics                                                                                                      | Bouchra Boujemla; Esperence Umumararungu; Jacob Souopgui; Keith Durkin; Léon Mutesa; Maria Artesi; Marie-Pierre Hayette; Patrick Tuyisenge; Robert Rutayisire; Sabin Nsanzimana; Swaibu Gatara; Sébastien Bontems; Vincent Bours; Yvan Butera                                                                         |
| EPI_ISL_925878, EPI_ISL_960230, EPI_ISL_960288, EPI_ISL_960300, EPI_ISL_960302, EPI_ISL_1020288, EPI_ISL_2362524, EPI_ISL_2362525, EPI_ISL_2362526, EPI_ISL_2365914, EPI_ISL_2521987, EPI_ISL_2521988, EPI_ISL_2521989, EPI_ISL_2521992, EPI_ISL_2521993, EPI_ISL_2521994, EPI_ISL_2521995, EPI_ISL_2521996, EPI_ISL_2521997, EPI_ISL_2522090, EPI_ISL_2522096, EPI_ISL_2828496 | see above                                                                                          | Nucleic Acid Testing, National Reference Laboratory                                                                        | Bouchra Boujemla; Corinne Fasquelle; Esperence Umumararungu; Jacob Souopgui; Keith Durkin; Léon Mutesa; Maria Artesi; Marie-Pierre Hayette; Nathalie Renotte; Patrick Tuyisenge; Reuben Sindayiheba; Robert Rutayisire; Sabin Nsanzimana; Swaibu Gatara; Sébastien Bontems; Vincent Bours; Yvan Butera                |
| EPI_ISL_2779342                                                                                                                                                                                                                                                                                                                                                                 | Nyamira County Referral Hospital                                                                   | USAMRD-A, Basic Science Laboratory                                                                                         | Alan Lemtudo; Beth Mutai; Brian Andika; Carol Kifude; Clement Masakwe; Eric Muthanje; Esther Omuseini; Faith Sige; Gathi Kimita; George Awinda; John Waitumbi; Josphat Nyataya; Rachel Githii; Rehema Liyai; Stephen Ochola                                                                                           |
| EPI_ISL_2372356, EPI_ISL_2372363                                                                                                                                                                                                                                                                                                                                                | Nyangabwe Hospital HIV Reference Laboratory                                                        | Botswana Harvard HIV Reference Laboratory                                                                                  | Boitumelo Zuze; Botshelo Radibe; Dorcas Maruapula; Joseph Makheka; Keoratlle Ntshambiwa; Kgomotso Moruisi; Legodile Koeepile; Madisa Mine; Mosepele Mosepele; Ontlametse T. Bareng; Pamela Smith-Lawrence; Roger Shapiro; Shahin Lockman; Sikhulle Moy; Simani Gaseitsiwe; Thongbotho Mphoyakgosi; Wonderful T. Choga |
| EPI_ISL_1549134, EPI_ISL_1549135, EPI_ISL_1549136, EPI_ISL_1549137                                                                                                                                                                                                                                                                                                              | OLVZ Aalst                                                                                         | OLVZ Aalst                                                                                                                 | Astrid Holderbekke                                                                                                                                                                                                                                                                                                    |
| EPI_ISL_2372266                                                                                                                                                                                                                                                                                                                                                                 | OUCRU                                                                                              | OUCRU                                                                                                                      | Guy Thwaites; Huynh Trung Trieu; Lam Minh Yen; Le Manh Hung; Le Nguyen Truc Nhu; Le Thi Thu Huong; Le Van Tan; Nghiem My Ngoc; Ngo Ngoc Quang Minh; Nguyen Thanh Dung; Nguyen Thanh Phong; Nguyen Thanh Truong; Nguyen Thi Han Ny; Nguyen Thi thu Hong; Nguyen                                                        |
| EPI_ISL_2406461                                                                                                                                                                                                                                                                                                                                                                 | Oddar Meanchey Rapid Response                                                                      | Virology Unit, Institut Pasteur du Cambodge                                                                                | Cecile Troupin; Chau Darapheak; Chin Savuth; Erik A Karlsson; Jurre Y Siegers; Kraing Sidonn; Leakhena Pum; Ly Sovann; Veasna Duong; Yi Sengdoern                                                                                                                                                                     |

| Team                                                                                                                                                                                                                                                                                                                                               |                                                                                                                        |                                                                                                                        |                                                                                                                                                                                                                                                                                                                                                                                                                                                                                                                                                                                                                                                                                                                                                                                                           |
|----------------------------------------------------------------------------------------------------------------------------------------------------------------------------------------------------------------------------------------------------------------------------------------------------------------------------------------------------|------------------------------------------------------------------------------------------------------------------------|------------------------------------------------------------------------------------------------------------------------|-----------------------------------------------------------------------------------------------------------------------------------------------------------------------------------------------------------------------------------------------------------------------------------------------------------------------------------------------------------------------------------------------------------------------------------------------------------------------------------------------------------------------------------------------------------------------------------------------------------------------------------------------------------------------------------------------------------------------------------------------------------------------------------------------------------|
| EPI_ISL_2547351                                                                                                                                                                                                                                                                                                                                    | Okiep CHC                                                                                                              | National Health Laboratory Service/University of Cape Town (NHLS/UCT)                                                  | Arash Iranzadeh; Bruna Galvaio; Carolyn Williamson; Deelan Doolabh; Diana Hardie; Gert Marais; Innocent Mudau; Lynn Tyers; Marvin Hsiao; Stephen Korsman                                                                                                                                                                                                                                                                                                                                                                                                                                                                                                                                                                                                                                                  |
| EPI_ISL_491993, EPI_ISL_492016, EPI_ISL_492020                                                                                                                                                                                                                                                                                                     | Oman-NIC                                                                                                               | Department of Microbiology and Immunology-SQUH                                                                         | Abdulla Balkhair; Ahlam Al-Amri; Aisha Al-Amri; Aisha Al-Busaidi; Amina Al Jardani; Fahad Zadjali; Fatma BaAlawi; Hamida AL Barwani; Hanan Al-kindi; Intisar Al-Shukri; Khulood Al-Mammary; Mohammed Al-Tobi; Samiha Al Kharusi; Samira Al-Maruqi; Zeyana AL-Dahmani                                                                                                                                                                                                                                                                                                                                                                                                                                                                                                                                      |
| EPI_ISL_457706                                                                                                                                                                                                                                                                                                                                     | Oman-NIC                                                                                                               | Oman-NIC                                                                                                               | Abdulla Balkhair; Ahlam Al-Amri; Aisha Al-Amri; Aisha Al-Busaidi; Amina Al Jardani; Fahad Zadjali; Fatma BaAlawi; Hamida AL Barwani; Hanan Al-kindi; Intisar Al-Shukri; Khulood Al-Mammary; Mohammed Al-Tobi; Samiha Al Kharusi; Samira Al-Maruqi; Zeyana AL-Dahmani                                                                                                                                                                                                                                                                                                                                                                                                                                                                                                                                      |
| EPI_ISL_2921200, EPI_ISL_2921201, EPI_ISL_2925612, EPI_ISL_2925623, EPI_ISL_2925625                                                                                                                                                                                                                                                                | Oman-NIC                                                                                                               | Oman-National Influenza Center                                                                                         | Aisha Al-Busaidi; Amina Al Jardani; Bilal Hussain; Fahad Al Balushi; Hanan Al Kindi; Intisar Al-Shukri; Intisar Al-Shukri.; Laila Al Balushi; Samiha Al Kharusi                                                                                                                                                                                                                                                                                                                                                                                                                                                                                                                                                                                                                                           |
| EPI_ISL_525429, EPI_ISL_1532301                                                                                                                                                                                                                                                                                                                    | Oman-National Influenza Center                                                                                         | Biotechnology & OMICs Laboratory                                                                                       | Abdul Latif Khan; Adil Al-Wahaibi; Adil Khan; Ahmed Al Harrasi; Ahmed Al-Harrasi; Ahmed Al-Rawahi; Ahmed N Al-Rawahi; Aisha Al-Amri; Amal Al-Maani; Amina Al-Jardani; Amina Al-Jardani.; Bilal Hussain; Hanan Al-Kindi; Intisar Al-Shukri; Sajjad Asaf; Samiha Al-Kharusi; Samira Al-Mahruqi; Samiya Al-Zadjali; Saqib Bilal; Seif Al-Abri                                                                                                                                                                                                                                                                                                                                                                                                                                                                |
| EPI_ISL_766569                                                                                                                                                                                                                                                                                                                                     | Oman-National Influenza Center                                                                                         | Oman-National Influenza Center                                                                                         | Aisha Al-Busaidi; Amina Al-Jardani; Hamida Al-Barwani; Hanan Al-Kindi; Intisar Al-Shukri; Laila Al-Balushi; Samiha Al-Kharusi; Samira Al-Mahruqi                                                                                                                                                                                                                                                                                                                                                                                                                                                                                                                                                                                                                                                          |
| EPI_ISL_1647382                                                                                                                                                                                                                                                                                                                                    | Orebro University Hospital                                                                                             | Orebro University Hospital                                                                                             | Sundqvist M et al                                                                                                                                                                                                                                                                                                                                                                                                                                                                                                                                                                                                                                                                                                                                                                                         |
| EPI_ISL_708172                                                                                                                                                                                                                                                                                                                                     | Oslo University Hospital, Department of Medical Microbiology                                                           | Norwegian Institute of Public Health, Department of Virology                                                           | Hilde Elshaug; Hilde Vollen; Kamilla Heddeland Instefjord; Karoline Bragstad; Kathrine Stene-Johansen; Marie Paulsen Madsen; Olav Hungnes; Rasmus Riis Kopperud                                                                                                                                                                                                                                                                                                                                                                                                                                                                                                                                                                                                                                           |
| EPI_ISL_2661879                                                                                                                                                                                                                                                                                                                                    | Oswaldo Cruz Institute, FIOCRUZ/CE                                                                                     | Analytical Competence Molecular Epidemiology Lab/ACME, Oswaldo Cruz Foundation, Ceara (FIOCRUZ CE)                     | Alice Sampaio Rocha; Ana Carolina Mendonca; Anna Carolina Paixao; Elisa Calvacante Pereira; Fabio Miyajima; Fernando Motta; Luciana Appolinario; Marilda Siqueira on behalf of the Fiocruz COVID-19 Genomic Surveillance Network; Paola Resende; Renata Serrano Lopes; Taina Venas                                                                                                                                                                                                                                                                                                                                                                                                                                                                                                                        |
| EPI_ISL_3031381, EPI_ISL_3031391, EPI_ISL_3031396, EPI_ISL_3031399                                                                                                                                                                                                                                                                                 | Othaya Sub-County Hospital                                                                                             | USAMRD-A, Basic Science Laboratory                                                                                     | Alan Lemtudo; Beth Mutai; Brian Andika; Carol Kifude; Clement Masakwe; Eric Muthanje; Esther Omuseni; Faith Sigei; Gathii Kimita; George Awinda; John Waitumbi; Josphat Nyataya; Rachel Githii; Rehema Liyai; Stephen Ochola                                                                                                                                                                                                                                                                                                                                                                                                                                                                                                                                                                              |
| EPI_ISL_2695585                                                                                                                                                                                                                                                                                                                                    | PATHCARE LABORATORY                                                                                                    | National Institute for Communicable Diseases of the National Health Laboratory Service                                 | Amoako DG; Bhiman JN; Everatt J; Ismail A; Mahlangu B; Mnguni A; Mohale T; Ntuli N; Scheepers C                                                                                                                                                                                                                                                                                                                                                                                                                                                                                                                                                                                                                                                                                                           |
| EPI_ISL_2695543, EPI_ISL_2695556                                                                                                                                                                                                                                                                                                                   | POLOKWANE MANKWENG HOSPITAL                                                                                            | National Institute for Communicable Diseases of the National Health Laboratory Service                                 | Amoako DG; Bhiman JN; Everatt J; Ismail A; Mahlangu B; Mnguni A; Mohale T; Ntuli N; Scheepers C                                                                                                                                                                                                                                                                                                                                                                                                                                                                                                                                                                                                                                                                                                           |
| EPI_ISL_2493252                                                                                                                                                                                                                                                                                                                                    | PRONTO ATENDIMENTO DE VARGEM GRANDE PAULLISTA                                                                          | Instituto Butantan                                                                                                     | Antonio Jorge Martins; Claudia Renata dos Santos Barros; David Schlesinger; Debora Botequino Moretti; Dimas Tadeu Covas; Elaine Cristina Marqueze; Elaine Vieira Santos; Evandra Strazza Rodrigues; Heidge Fukumasu; Jayme Augusto de Souza-Neto; José Salvatore Leister Patané; Luiz Alcantara; Luiz Lehmann Coutinho; Maria Carolina Elias; Maurício Lacerda Nogueira; Rafael dos Santos Bezerra; Raul Machado Neto; Rejane Maria Tommasini Grotto; Ricardo Haddad; Sandra Coccuzzo Sampaio Vessoni; Simone Kashima; Svetoslav Nanev Slavov; Vincent Louis Viala                                                                                                                                                                                                                                        |
| EPI_ISL_2241612, EPI_ISL_2241613, EPI_ISL_2504094, EPI_ISL_2504099, EPI_ISL_2504101, EPI_ISL_2504102, EPI_ISL_2504103, EPI_ISL_2504104, EPI_ISL_2504105, EPI_ISL_2504106, EPI_ISL_2504107, EPI_ISL_2504108, EPI_ISL_2504110, EPI_ISL_2504112, EPI_ISL_2504114, EPI_ISL_2504115, EPI_ISL_2504116, EPI_ISL_2504117, EPI_ISL_2509333, EPI_ISL_2509334 | see above                                                                                                              | Palapye Primary Hospital Laboratory                                                                                    | Botswana Harvard HIV Reference Laboratory                                                                                                                                                                                                                                                                                                                                                                                                                                                                                                                                                                                                                                                                                                                                                                 |
| EPI_ISL_596561, EPI_ISL_596567                                                                                                                                                                                                                                                                                                                     | Palestinian Ministry of Health                                                                                         | Molecular Genetics Lab                                                                                                 | Boitumelo Zuze; Botshelo Radibe; David Lawrence; Dorcas Maruapula; Joseph Makhema; Keoratlile Ntshambwa; Kwana Lechille; Legodile Kooepile; Letsibogo Gaoraalwe; Madisa Mine; Modisa Motswale; Mosepele Mosepele; Ontlametse T. Bareng; Roger Shapiro; Shahin Lockman; Sikhulile Moyo; Sikhulile Wonderful T. Choga; Simani Gaseitsiwe; Thela Tefelo; Thongbotho Mphoyakgosi; Wonderful T. Choga                                                                                                                                                                                                                                                                                                                                                                                                          |
| EPI_ISL_2035941, EPI_ISL_2035942, EPI_ISL_2035945, EPI_ISL_2035946, EPI_ISL_2035947, EPI_ISL_2035988                                                                                                                                                                                                                                               | Pasteur Institute - Laboratory of Clinical Virology                                                                    | Pasteur Institute - Laboratory of Clinical Virology                                                                    | Damien Richard; Dana Najjar; Francois Balloux; Hisham Darwish; Husam Sallam; Issa Shtayah; Lucy van Dorp; Mahmoud Ruzayqat; Nouar Qutob; Osama Najjar; Zaidoun Salah                                                                                                                                                                                                                                                                                                                                                                                                                                                                                                                                                                                                                                      |
| EPI_ISL_596777, EPI_ISL_794715, EPI_ISL_1017678                                                                                                                                                                                                                                                                                                    | PathWest Laboratory Medicine WA                                                                                        | PathWest Laboratory Medicine WA Microbial Surveillance Unit                                                            | Anissa Chouikha; Henda Triki; Kais Ghedira; Mariem Gdoura; Sondos Haddad; Wasfi Fares                                                                                                                                                                                                                                                                                                                                                                                                                                                                                                                                                                                                                                                                                                                     |
| EPI_ISL_3207498                                                                                                                                                                                                                                                                                                                                    | Pathcare lab                                                                                                           | NHLS/UCT                                                                                                               | PathWest Laboratory Medicine WA Microbial Surveillance Unit                                                                                                                                                                                                                                                                                                                                                                                                                                                                                                                                                                                                                                                                                                                                               |
| EPI_ISL_2013036                                                                                                                                                                                                                                                                                                                                    | Pathcare-Vermaak Centurion                                                                                             | National Institute for Communicable Diseases of the National Health Laboratory Service                                 | Arash Iranzadeh; Bruna Galvaio; Carolyn Williamson; Deelan Doolabh; Diana Hardie; Gert Marais; Innocent Mudau; Lynn Tyers; Marvin Hsiao; Rageema Joseph; Sisonke; Stephen Korsman                                                                                                                                                                                                                                                                                                                                                                                                                                                                                                                                                                                                                         |
| EPI_ISL_1483230                                                                                                                                                                                                                                                                                                                                    | Pathogen Discovery, Respiratory Viruses Branch, Division of Viral Diseases, Centers for Disease Control and Prevention | Pathogen Discovery, Respiratory Viruses Branch, Division of Viral Diseases, Centers for Disease Control and Prevention | Amoako DG; Bhiman JN; Glass A; Gottberg A; Mahlangu B; Mohale T; Ntuli N; Oliveira TD; Scheepers C; Tegally H; Viana R                                                                                                                                                                                                                                                                                                                                                                                                                                                                                                                                                                                                                                                                                    |
| EPI_ISL_684112, EPI_ISL_768646, EPI_ISL_895590                                                                                                                                                                                                                                                                                                     | Pathogen Genomics Center, National Institute of Infectious Diseases                                                    | Pathogen Genomics Center, National Institute of Infectious Diseases                                                    | Anna Kelleher; Anna Uehara; Brian Lynch; Clinton R. Paden; Haibin Wang; Han Jia Justin Ng; Jing Zhang; Krista Queen; Peter Cook; Suxiang Tong; Yan Li; Ying Tao                                                                                                                                                                                                                                                                                                                                                                                                                                                                                                                                                                                                                                           |
| EPI_ISL_513172, EPI_ISL_677947, EPI_ISL_678170, EPI_ISL_751220                                                                                                                                                                                                                                                                                     | Pathogen Genomics Lab King Abdullah University of Science and Technology(KAUST)                                        | Pathogen Genomics Lab King Abdullah University of Science and Technology(KAUST)                                        | Kentaro Itokawa; Makoto Kuroda; Masanori Hashino; Rina Tanaka; Tsuyoshi Sekizuka                                                                                                                                                                                                                                                                                                                                                                                                                                                                                                                                                                                                                                                                                                                          |
| EPI_ISL_2859182                                                                                                                                                                                                                                                                                                                                    | Philippine General Hospital (PGH)                                                                                      | Philippine Genome Center                                                                                               | Abbas Al Mutair; Abdulaziz Alahmadi; Afrah Alsomali; Amanda Ooi; Amit Kumar Subudhi; Anwar Hashem; Arnab Pain; Asim Khogeer; Awad Al-Omari; Fadwa Alofi; Fathia Ben Rached; Jumana Taha; Kahled Alghithami; Luke Esau; Muhammad Shuaib; Naif Almontashiri; Nashwa Al-khotani; Olga Douvropoulou; Raeec Naem; Rahul P Salunke; Raushan Nugmanova; Samer Salih; Sara Mfarrej; Sharif Hala                                                                                                                                                                                                                                                                                                                                                                                                                   |
| EPI_ISL_2153969                                                                                                                                                                                                                                                                                                                                    | Philippine Genome Center - Biobank (Region IV-A)                                                                       | Philippine Genome Center                                                                                               | Alethea R. de Guzman; Anna Ong-Lim; Arianne A. Zamora; Benedict A. Maralit; Carlo M. Lapid; Celia Carlos; Devon Ray Pacial; Diomedes A. Carino; Edsel Maurice Salvaña; El King D. Morado; Elcid Aaron R. Pangilinan; Eva Maria Cutiongco-de la Paz; Francis A. Tablizo; Henrietta Marie Rodriguez; Jaime C. Montoya; Jan Michael C. Yap; Jarvin E. Nipales; Jo-Hannah S. Llames; John Q. Wong; Joshua Gregor A. Dizon; Juan Antonio R. Magalang; Karol Sophia Agape R. Padilla; Kenneth M. Kim; Kris P. Punayan; Marc Edsel C. Ayes; Marc Jerrone R. Castro; Maria Rosario Singh-Vergeire and Cynthia P. Saloma; Maria Sofia L. Yangzon; Marielle M Gamboa; Marissa Alejandria; Nina Francesca Bustamante; Razel Nikka M. Hao; Renato Jacinto Q. Mantaring; Rianna Patricia S. Cruz; Sheila Mae M. Araiza |
| EPI_ISL_2860018                                                                                                                                                                                                                                                                                                                                    | Philippine Red Cross - Clark Molecular Laboratory                                                                      | Philippine Genome Center                                                                                               | Alethea R. de Guzman; Anna Ong-Lim; Arianne A. Zamora; Benedict A. Maralit; Carlo M. Lapid; Celia Carlos; Devon Ray Pacial; Diomedes A. Carino; Edsel Maurice Salvaña; El King D. Morado; Elcid Aaron R. Pangilinan; Eva Maria Cutiongco-de la Paz; Francis A. Tablizo; Henrietta Marie Rodriguez; Jaime C. Montoya; Jan Michael C. Yap; Jarvin E. Nipales; Jo-Hannah S. Llames; John Q. Wong; Joshua Gregor A. Dizon; Juan Antonio R. Magalang; Karol Sophia Agape R. Padilla; Kenneth M. Kim; Kris P. Punayan; Marc Edsel C. Ayes; Marc Jerrone R. Castro; Maria Rosario Singh-Vergeire and Cynthia P. Saloma; Maria Sofia L. Yangzon; Marielle M Gamboa; Marissa Alejandria; Nina Francesca Bustamante; Razel Nikka M. Hao; Renato Jacinto Q. Mantaring; Rianna Patricia S. Cruz; Sheila Mae M. Araiza |
| EPI_ISL_2802119                                                                                                                                                                                                                                                                                                                                    | Phutanang Clinic                                                                                                       | NHLS/UCT                                                                                                               | Yvonne Valerie Austria; Zipporah Mariebelle R. Enriquez; Zyrel V. Mollejon                                                                                                                                                                                                                                                                                                                                                                                                                                                                                                                                                                                                                                                                                                                                |
| EPI_ISL_2422181                                                                                                                                                                                                                                                                                                                                    | Platform BIS UZA/UAntwerpen                                                                                            | Labo Klinische Biologie, UZA                                                                                           | Arash Iranzadeh; Bruna Galvaio; Carolyn Williamson; Deelan Doolabh; Diana Hardie; Gert Marais; Innocent Mudau; Lynn Tyers; Marvin Hsiao; Stephen Korsman                                                                                                                                                                                                                                                                                                                                                                                                                                                                                                                                                                                                                                                  |
| EPI_ISL_1120736                                                                                                                                                                                                                                                                                                                                    | Platform BIS UZA/UAntwerpen                                                                                            | UAntwerp, Laboratory of Medical Microbiology                                                                           | Basil Britto Xavier; Christine Lammens; Herman Goossens; Jasmine Coppens; Marie Le Mercier; Veerle Matheussens                                                                                                                                                                                                                                                                                                                                                                                                                                                                                                                                                                                                                                                                                            |
| EPI_ISL_2447813                                                                                                                                                                                                                                                                                                                                    | Port Elizabeth Laboratory                                                                                              | National Institute for Communicable Diseases of the National Health Laboratory Service                                 | Basil Britto Xavier; Christine Lammens; Herman Goossens; Jasmine Coppens; Marie Le Mercier; Veerle Matheussens                                                                                                                                                                                                                                                                                                                                                                                                                                                                                                                                                                                                                                                                                            |
| EPI_ISL_712071                                                                                                                                                                                                                                                                                                                                     | Port Elizabeth Provincial Hospital, National Health Laboratory Services, Eastern Cape, South Africa                    | National Institute for Communicable Diseases of the National Health Laboratory Service                                 | Amoako DG; Bhiman JN; Ismail A; Mahlangu B; Mohale T; Ntuli N; Scheepers C                                                                                                                                                                                                                                                                                                                                                                                                                                                                                                                                                                                                                                                                                                                                |
| EPI_ISL_2779317, EPI_ISL_2779424, EPI_ISL_3031388, EPI_ISL_3031389, EPI_ISL_3031390, EPI_ISL_3031419, EPI_ISL_3031420                                                                                                                                                                                                                              | see above                                                                                                              | Port Health Clinic, Busia border point                                                                                 | Allam M; Bhiman JN; Ismail A; Mahlangu B; Mohale T; Ntuli N                                                                                                                                                                                                                                                                                                                                                                                                                                                                                                                                                                                                                                                                                                                                               |
| EPI_ISL_2779318, EPI_ISL_2779494, EPI_ISL_2779501                                                                                                                                                                                                                                                                                                  | Port Health Clinic, Malaba border point                                                                                | USAMRD-A, Basic Science Laboratory                                                                                     | Alan Lemtudo; Beth Mutai; Brian Andika; Carol Kifude; Clement Masakwe; Eric Muthanje; Esther Omuseni; Faith Sigei; Gathii Kimita; George Awinda; John Waitumbi; Josphat Nyataya; Rachel Githii; Rehema Liyai; Stephen Ochola                                                                                                                                                                                                                                                                                                                                                                                                                                                                                                                                                                              |
| EPI_ISL_2790405                                                                                                                                                                                                                                                                                                                                    | Primary Health Care Prijedor                                                                                           | Public Health Institute of Republic of Srpska                                                                          | Alan Lemtudo; Beth Mutai; Brian Andika; Carol Kifude; Clement Masakwe; Eric Muthanje; Esther Omuseni; Faith Sigei; Gathii Kimita; George Awinda; John Waitumbi; Josphat Nyataya; Rachel Githii; Rehema Liyai; Stephen Ochola                                                                                                                                                                                                                                                                                                                                                                                                                                                                                                                                                                              |
| EPI_ISL_1647744, EPI_ISL_1749617, EPI_ISL_2657889                                                                                                                                                                                                                                                                                                  | Public Health Authority of the Slovak Republic                                                                         | Laboratory of Genomics and Bioinformatics, Comenius University Science Park                                            | Branka Culibrk; Dijana Vukajlovic; Milica Celic; Pava Dimitrijevic; Stanka Tomic; Tatjana Markovic; Zeljka Sumic                                                                                                                                                                                                                                                                                                                                                                                                                                                                                                                                                                                                                                                                                          |
| EPI_ISL_2397276                                                                                                                                                                                                                                                                                                                                    | Public Health Authority of the Slovak Republic                                                                         | Public Health Authority of the Slovak Republic                                                                         | Anna Gičová; Diana Rušňáková; Jakub Styk; Jaroslav Budiš; Miroslav Böhmer; Tatiana Sedláčková; Tomáš Szemes                                                                                                                                                                                                                                                                                                                                                                                                                                                                                                                                                                                                                                                                                               |
| EPI_ISL_2860640                                                                                                                                                                                                                                                                                                                                    | Public Health Reference Laboratory                                                                                     | Erasmus Medical Center                                                                                                 | Anna Gičová; Barbora Kotvasová; Elena Tichá; Lucia Ševčíková; Miroslav Böhmer; Pavol Mišenko; Terézia Vrabľová; Tomáš Szemes                                                                                                                                                                                                                                                                                                                                                                                                                                                                                                                                                                                                                                                                              |
| EPI_ISL_513313                                                                                                                                                                                                                                                                                                                                     | Public Health, United States Air Force                                                                                 | Public Health, United States Air Force School of Aerospace                                                             | Anne van der Linden; Anemiek van der Eijk; Bas Oude Munnink; Corine GeurtsvanKessel; David Nieuwenhuijse; Emmanuelle Mungler; Irina Chestakova; Marion Koopmans; Marjan Boter; Omar Elahmer-Abdulla Bashein- Rahma Algeriani-Ahlam Alarif; Reina Sikkema; Richard Molenkamp; on behalf of the Dutch national COVID-19 response team.                                                                                                                                                                                                                                                                                                                                                                                                                                                                      |
|                                                                                                                                                                                                                                                                                                                                                    |                                                                                                                        |                                                                                                                        | A.C.; A.K.; A.W.; B.C.; C.R.; Chapleau; Connors; E.A.; Fries; J.R.; Javorina; Lambert; Macias; Meyer; Purves; R.R. and Starr; S.M.                                                                                                                                                                                                                                                                                                                                                                                                                                                                                                                                                                                                                                                                        |

|                                                                                                                                                                                                                                                                                                                                                                                                                                                                                                                                                                                                  | School of Aerospace Medicine                                                           | Medicine                                                                                                                                         |                                                                                                                                                                                                                                                                                                                                                                                                                                                          |
|--------------------------------------------------------------------------------------------------------------------------------------------------------------------------------------------------------------------------------------------------------------------------------------------------------------------------------------------------------------------------------------------------------------------------------------------------------------------------------------------------------------------------------------------------------------------------------------------------|----------------------------------------------------------------------------------------|--------------------------------------------------------------------------------------------------------------------------------------------------|----------------------------------------------------------------------------------------------------------------------------------------------------------------------------------------------------------------------------------------------------------------------------------------------------------------------------------------------------------------------------------------------------------------------------------------------------------|
| EPI_ISL_493545, EPI_ISL_493546                                                                                                                                                                                                                                                                                                                                                                                                                                                                                                                                                                   | Quadram Institute Bioscience                                                           | COVID-19 Genomics UK (COG-UK) Consortium                                                                                                         | Alexander J Trotter; Alison E. Mather; Alp Aydin; Ana P. Tedim; Anastasia Kolyva; Andrew Bell; Andrew J. Page; Claire Stuart; Dave J. Baker; Gemma L. Kay; John Wain; Justin O'Grady; Leonardo de Oliveira Martins; Lizzie Meadows; Maria Diaz; Mark Webber; Muhammed Yasir; Nabil-Fareed Alikhan; Ngozi Elumogo; Nicholas M. Thomson; Rachael Stanley; Rachel Gilroy; Reemeh Prakash; Samir Dervisevic; Samuel Bloomfield; Steven Rudder; Thanh Le-Viet |
| EPI_ISL_1300532, EPI_ISL_1306135                                                                                                                                                                                                                                                                                                                                                                                                                                                                                                                                                                 | Queensland Health Forensic and Scientific Services                                     | Queensland Health Forensic and Scientific Services                                                                                               | Son Nguyen                                                                                                                                                                                                                                                                                                                                                                                                                                               |
| EPI_ISL_2531934                                                                                                                                                                                                                                                                                                                                                                                                                                                                                                                                                                                  | RIP                                                                                    | National Reference Center for Viruses of Respiratory Infections, Institut Pasteur, Paris                                                         | Angela Brisebarre; Camille Capel; Christophe Malabat; Corinne Maufrais; Etienne Simon-Lorière; Frédéric Lemoine; Louise Lefrançois; Marion Barbet; Maud Vanpeene; Méline Bizard; Stéphanie Guymard-Rabenirina; Sylvie Behillili; Sylvie Van der Werf; Vincent Enouf                                                                                                                                                                                      |
| EPI_ISL_2086961, EPI_ISL_2273062, EPI_ISL_2273063, EPI_ISL_2273067, EPI_ISL_2273068, EPI_ISL_2273075, EPI_ISL_2273079, EPI_ISL_2273080, EPI_ISL_2273081, EPI_ISL_2273085, EPI_ISL_2273089, EPI_ISL_2454661, EPI_ISL_2454662, EPI_ISL_2454667, EPI_ISL_2454671, EPI_ISL_2454677, EPI_ISL_2454681, EPI_ISL_2454683, EPI_ISL_2582830, EPI_ISL_2695609, EPI_ISL_2695612, EPI_ISL_2695615, EPI_ISL_2695616, EPI_ISL_2695621, EPI_ISL_2695623, EPI_ISL_2695625, EPI_ISL_2695754, EPI_ISL_2695755, EPI_ISL_2695756, EPI_ISL_2695763, EPI_ISL_2695764, EPI_ISL_2695767, EPI_ISL_2695770, EPI_ISL_2695771 | National Institute for Communicable Diseases of the National Health Laboratory Service | Amoako DG; Bhiman JN; Everatt J; Ismail A; Mahlangu B; Mnguni A; Mohale T; Ntuli N; Scheepers C                                                  |                                                                                                                                                                                                                                                                                                                                                                                                                                                          |
| see above                                                                                                                                                                                                                                                                                                                                                                                                                                                                                                                                                                                        | ROB FERREIRA LABORATORY                                                                | National Institute for Communicable Diseases of the National Health Laboratory Service                                                           | Amoako DG; Bhiman JN; Everatt J; Ismail A; Mahlangu B; Mnguni A; Mohale T; Ntuli N; Scheepers C                                                                                                                                                                                                                                                                                                                                                          |
| EPI_ISL_763064                                                                                                                                                                                                                                                                                                                                                                                                                                                                                                                                                                                   | RS Kasih Ibu, Surakarta                                                                | Universitas Sebelas Maret (UNS); Rumah Sakit UNS (RS-UNS); National Institute of Health Research and Development, Indonesian Ministry of Health. | Aff A Ghufron; Arie A Nugraha; Betty Suryawati; Dewi Puspa; Hana A Pawestri; Hartanti Dian Ika; Hartono; Kartika; Maryani; Revi G H Novika; Vivi Setiawaty.; Yulia Sari                                                                                                                                                                                                                                                                                  |
| EPI_ISL_2262254                                                                                                                                                                                                                                                                                                                                                                                                                                                                                                                                                                                  | RS Umum Kartika Pulomas                                                                | National Institute of Health Research and Development                                                                                            | Arie Ardiansyah Nugraha; Hana Apsari Pawestri; Hartanti Dian Ikawati; Kartika Dewi Puspa; Krisna Pangesti; Nelly Puspandari; Subangkit; Triyani Soekarso; Vivi Setiawaty                                                                                                                                                                                                                                                                                 |
| EPI_ISL_454512, EPI_ISL_454520                                                                                                                                                                                                                                                                                                                                                                                                                                                                                                                                                                   | RSE "National Center for Biotechnology"                                                | RSE "National Center for Biotechnology"                                                                                                          | Akbota Rakhmetova; Alexandr Shevtsov; Askar Abdaliyev; Asylulan Amirgazin; Ilyas Akhmetolayev; Ruslan Kalender; Viktoriya Lutsay; Yerlan Ramankulov; Zabira Aushakhmetova                                                                                                                                                                                                                                                                                |
| EPI_ISL_637110, EPI_ISL_637113                                                                                                                                                                                                                                                                                                                                                                                                                                                                                                                                                                   | Rafik Hariri University Hospital                                                       | Microbial Pathogenomics Lab                                                                                                                      | Georgii Merhi; Rita Feghali; Sima Tokajian; Tamara Salloum                                                                                                                                                                                                                                                                                                                                                                                               |
| EPI_ISL_450512, EPI_ISL_450515                                                                                                                                                                                                                                                                                                                                                                                                                                                                                                                                                                   | Rafik Hariri University Hospital                                                       | Rafik Hariri University Hospital                                                                                                                 | Rita Feghali                                                                                                                                                                                                                                                                                                                                                                                                                                             |
| EPI_ISL_2348635, EPI_ISL_2348646                                                                                                                                                                                                                                                                                                                                                                                                                                                                                                                                                                 | Rakai Health Sciences Program                                                          | MRC/UVRI & LSHTM Uganda Research Unit                                                                                                            | Charles Ssuuna; Dan Lule Bugembe; Matthew Cotten; My V.T. Phan; Pontiano Kaleebu; Ronald Moses Galiwango; Steven J Reynolds                                                                                                                                                                                                                                                                                                                              |
| EPI_ISL_447029                                                                                                                                                                                                                                                                                                                                                                                                                                                                                                                                                                                   | Ramathibodi Hospital                                                                   | COVID-19 Network Investigations (CONI) Alliance                                                                                                  | Angkana Huang; Anthony R. Jones; Arporn Wangwiwatsin; Bhakbhoom Panthan; Chonticha Klungtong; Ekawat Pasomsub; Elizabeth Batty; Insee Semsorn; Janjira Thaipadungpanit; Khajohn Joonsalak; Kingkan Rakmanee; Krittikorn Kumpornsri; Namfon Kotanan; Stefan Fernandez; Thanat Chookajorn; Theerarat Kochakarn; Treewat Watthanachockchai; Wasun Chantratrata; Wudtichai Manasatienkij                                                                     |
| EPI_ISL_1740690                                                                                                                                                                                                                                                                                                                                                                                                                                                                                                                                                                                  | Randox Laboratories                                                                    | Wellcome Sanger Institute for the COVID-19 Genomics UK (COG-UK) Consortium                                                                       | Cordeia Langford; David K. Jackson; Dominic Kwiatkowski; Ewan Harrison; Ian Johnston; Jeffrey Barrett; John Sillitoe on behalf of the Wellcome Sanger Institute COVID-19 Surveillance Team; Randox Laboratories and Alex Alderton; Roberto Amato; Sonia Goncalves                                                                                                                                                                                        |
| EPI_ISL_2157357                                                                                                                                                                                                                                                                                                                                                                                                                                                                                                                                                                                  | Red - Regional de Vigilancia Genómica del COVID-19                                     | Laboratory of Respiratory Viruses and Measles, Oswaldo Cruz Institute, FIOCRUZ                                                                   | Alice Sampaio Rocha; Ana Carolina Mendonca; Anna Carolina Paixao; Claudia Díaz; Ellisa Cavalcante Pereira; Fernando Motta; Luciana Appolinario; Marilda Siqueira on behalf of the Fiocruz COVID-19 Genomic Surveillance Network; Mitzi Castro; Paola Resende; Renata Serrano Lopes; Sandra Paola Paz; Taina Venas                                                                                                                                        |
| EPI_ISL_1415392, EPI_ISL_1415415                                                                                                                                                                                                                                                                                                                                                                                                                                                                                                                                                                 | Reference Laboratory of the Ministry of Health                                         | Laboratory of Respiratory Viruses and Measles, Oswaldo Cruz Institute, FIOCRUZ                                                                   | Alice Sampaio Rocha; Ana Carolina Mendonca; Anna Carolina Paixao; Fernando Motta; Indira Martins; Jessica Edwards; Luciana Appolinario; Marilda Siqueira on behalf of the Fiocruz COVID-19 Genomic Surveillance Network; Paola Resende; Renata Serrano Lopes                                                                                                                                                                                             |
| EPI_ISL_2982858, EPI_ISL_2982863                                                                                                                                                                                                                                                                                                                                                                                                                                                                                                                                                                 | Reference Laboratory of the Ministry of Health Royal Victoria Gardens                  | Laboratory of Respiratory Viruses and Measles, Oswaldo Cruz Institute, FIOCRUZ                                                                   | Agatha Cristinne Prudencio; Alice Sampaio Rocha; Ana Carolina Mendonca; Anna Carolina Paixao; Elisa Cavalcante Pereira; Fernando Motta; Ighor Leonardo Arantes Gomes; Indira Martins; Jessica Edwards; Luciana Appolinario; Marilda Siqueira on behalf of the Fiocruz COVID-19 Genomic Surveillance Network; Paola Resende; Renata Serrano Lopes; Taina Venas                                                                                            |
| EPI_ISL_768617                                                                                                                                                                                                                                                                                                                                                                                                                                                                                                                                                                                   | Regional Medical Sciences Center 5 Samut Songkhram                                     | National Institute of Health, Department of Medical Sciences, Ministry of Public Health, Thailand                                                | ; Natchaya Khiahsang; Pakorn Piromtong; Pilailuk Okada; Ratana Tacharoenmuang; Siripaporn Phuyugun; Sittiporn Parmnen; Sunthareeya Waicharoen; Thanutsapa Thanadachakul; Warawan Wongboot; sirikanda wimol                                                                                                                                                                                                                                               |
| EPI_ISL_708808                                                                                                                                                                                                                                                                                                                                                                                                                                                                                                                                                                                   | Regional medical sciences center 6 chonburi                                            | National Institute of Health, Department of Medical Sciences, Ministry of Public Health, Thailand                                                | Malinee Chittaganpitch; Pakorn Piromtong; Pilailuk Okada; Siripaporn Phuyugun; Sittiporn Parmnen; Sunthareeya Waicharoen; Thanutsapa Thanadachakul; Warawan Wongboot                                                                                                                                                                                                                                                                                     |
| EPI_ISL_2796509                                                                                                                                                                                                                                                                                                                                                                                                                                                                                                                                                                                  | Research Center Clinical virology, Tehran University of Medical Sciences               | Genetics Research Center, University of Social Welfare and Rehabilitation Sciences                                                               | Ali Jafarpour; Alireza Abollahi; Fateme Tavangar; Hossein Najmabadi.; Kimia Kahrizi; Marzieh Mohseni; Seyed Mohammad Jazayeri; Zohreh Fattahi                                                                                                                                                                                                                                                                                                            |
| EPI_ISL_2544703                                                                                                                                                                                                                                                                                                                                                                                                                                                                                                                                                                                  | Research Center for Emerging Viral Infections, Chang Gung University, Taiwan           | Research Center for Emerging Viral Infections, Chang Gung University, Taiwan                                                                     | Carol Wang; Chung-Guei Huang; Hsiao-Chen Tu; Hui-Ying Weng; Hung-Yu Shu; Jason Su; Jora Lin; Kuo-Ming Lee; Po-Wei Huang; Pocky Lai; Shih-Feng Tsai; Shin-Ru Shih; Shu-Li Yang; Tsu-Lan Wu; Yu-Nong Gong; Yung-Feng Lin                                                                                                                                                                                                                                   |
| EPI_ISL_2742228                                                                                                                                                                                                                                                                                                                                                                                                                                                                                                                                                                                  | Respiratory Virus Unit, Microbiology Services Colindale, Public Health England         | COVID-19 Genomics UK (COG-UK) Consortium                                                                                                         | PHE Covid Sequencing Team                                                                                                                                                                                                                                                                                                                                                                                                                                |
| EPI_ISL_769875                                                                                                                                                                                                                                                                                                                                                                                                                                                                                                                                                                                   | Respiratory Virus Unit, National Infection Service, Public Health England              | COVID-19 Genomics UK (COG-UK) Consortium                                                                                                         | PHE Covid Sequencing Team                                                                                                                                                                                                                                                                                                                                                                                                                                |
| EPI_ISL_906851                                                                                                                                                                                                                                                                                                                                                                                                                                                                                                                                                                                   | Respiratory Viruses Branch, Centers for Disease Control and Prevention                 | Respiratory Viruses Branch, Centers for Disease Control and Prevention                                                                           | C.R.; Cook, P.; Li, Y.; Paden; Queen, K.; Tao, Y.; Tong, S.; Uehara, A.; Wang, H.; Zhang, J.                                                                                                                                                                                                                                                                                                                                                             |
| EPI_ISL_1239490                                                                                                                                                                                                                                                                                                                                                                                                                                                                                                                                                                                  | Rob Ferreira Hospital, National Health Laboratory Services, Mpumalanga, South Africa   | National Institute for Communicable Diseases of the National Health Laboratory Service                                                           | Amoako DG; Bhiman JN; Ismail A; Mahlangu B; Mohale T; Ntuli N; Scheepers C                                                                                                                                                                                                                                                                                                                                                                               |
| EPI_ISL_2447838, EPI_ISL_2447870, EPI_ISL_2447871                                                                                                                                                                                                                                                                                                                                                                                                                                                                                                                                                | Rob Ferreira Laboratory                                                                | National Institute for Communicable Diseases of the National Health Laboratory Service                                                           | Amoako DG; Bhiman JN; Ismail A; Mahlangu B; Mohale T; Ntuli N; Scheepers C                                                                                                                                                                                                                                                                                                                                                                               |
| EPI_ISL_2250216                                                                                                                                                                                                                                                                                                                                                                                                                                                                                                                                                                                  | Royal Darwin Hospital Pathology                                                        | Microbiological Diagnostic Unit Public Health Laboratory (MDU-PHL)                                                                               | Caly L.; Druce J.; M.L.; Meumann, E.; N.L.; Sait; Seemann T.; Sherry                                                                                                                                                                                                                                                                                                                                                                                     |
| EPI_ISL_1063900, EPI_ISL_1063901, EPI_ISL_1063915                                                                                                                                                                                                                                                                                                                                                                                                                                                                                                                                                | Rwanda National Reference Laboratory                                                   | Rwanda National Reference Laboratory                                                                                                             | Enatha Mukantwari; Umuringa Jeanne d'Arc; Umuringa Jeanne d'Arc                                                                                                                                                                                                                                                                                                                                                                                          |
| EPI_ISL_1603794                                                                                                                                                                                                                                                                                                                                                                                                                                                                                                                                                                                  | SARS-CoV-2 Sequencing Castilla y Leon-Spain Consortium                                 | SARS-CoV-2 Sequencing Castilla y Leon-Spain Consortium                                                                                           | Antonio Orduña-Domingo; Carlos Fuster Foz; Carmen Aldea-Mansilla; Carmen Gimeno Crespo; David Abad; Gregoria Megías Lobón; Jose María Eiros Bouza; Laura Sánchez de Prada; M. Isabel Fernandez-Natal; Marta Dominguez-Gil; Marta Hernandez; María Antonia García Castro; M <sup>o</sup> Fe Brezmes-Valdivieso; Noelia Arenal Andrés; Silvia Rojo; Sonsoles Garcinuño Pérez                                                                               |
| EPI_ISL_1046778, EPI_ISL_2131701, EPI_ISL_2131743, EPI_ISL_2131776, EPI_ISL_2337068                                                                                                                                                                                                                                                                                                                                                                                                                                                                                                              | SARS-CoV-2 testing team, National Institute of Infectious Diseases                     | Pathogen Genomics Center, National Institute of Infectious Diseases                                                                              | Chang-Kweng Lim; Eri Nakayama; Hazuka Y Furihata; Kentaro Itokawa; Makoto Kuroda; Masanori Hashino; Masumichi Saito; Naomi Nojiri; Nozomu Hanaoka; Rina Tanaka; Sana Uchikoba; Shigeru Tajima; Tsuguo Fujimoto; Tsuyoshi Sekizuka                                                                                                                                                                                                                        |
| EPI_ISL_2934570                                                                                                                                                                                                                                                                                                                                                                                                                                                                                                                                                                                  | SECP MHU                                                                               | The Institute of Molecular Biology and Genetics of NASU                                                                                          | M.Tukalo et al.                                                                                                                                                                                                                                                                                                                                                                                                                                          |
| EPI_ISL_1171547                                                                                                                                                                                                                                                                                                                                                                                                                                                                                                                                                                                  | SYNLAB                                                                                 | GIGA Medical Genomics                                                                                                                            | Bouchra Boujemla; Cécile Meex; Keith Durkin; Maria Artesi; Marie-Pierre Hayette; Nathalie Renotte; Pierrette Melin; Raphaël Boreux; Sébastien Bontems; Vincent Bours                                                                                                                                                                                                                                                                                     |
| EPI_ISL_2642768, EPI_ISL_2643648                                                                                                                                                                                                                                                                                                                                                                                                                                                                                                                                                                 | SYNLAB Eesti OÜ                                                                        | Department of Microbiology, Institute of Biomedicine and Translational Medicine, University of Tartu                                             | Aare Abroi; Andrio Lahesaare; Arina Shablinskaja; Dagmar Hoidmets; Ene-Ly Jõgeda; Eveli Kallas; Heiki Niglas; Irja Lutsar; Kai Truusalu; Kaisa Truus; Katrin Kaarna; Kristi Huik; Liidia Dotsenko; Lili Azin Milani; Mari-Anne Härma; Mats Hansen; Meri Pauskar; Olga Sadikova; Paul Naaber; Radko Avi; Taavi Päll; Tuuli Reisberg; Ulvi Gerst Talas                                                                                                     |
| EPI_ISL_1217446, EPI_ISL_1281143, EPI_ISL_1437373                                                                                                                                                                                                                                                                                                                                                                                                                                                                                                                                                | SYNLAB MVZ Heidelberg                                                                  | Robert Koch Institute                                                                                                                            |                                                                                                                                                                                                                                                                                                                                                                                                                                                          |
| EPI_ISL_1567985                                                                                                                                                                                                                                                                                                                                                                                                                                                                                                                                                                                  | SYNLAB MVZ Leinfelden-Echterdingen                                                     | Robert Koch Institute                                                                                                                            |                                                                                                                                                                                                                                                                                                                                                                                                                                                          |
| EPI_ISL_2267650                                                                                                                                                                                                                                                                                                                                                                                                                                                                                                                                                                                  | SYNLAB MVZ Leverkusen                                                                  | Robert Koch Institute                                                                                                                            |                                                                                                                                                                                                                                                                                                                                                                                                                                                          |
| EPI_ISL_586568                                                                                                                                                                                                                                                                                                                                                                                                                                                                                                                                                                                   | Saikrishna Hospital, Mehsana                                                           | Gujarat Biotechnology Research Centre                                                                                                            | A M Kadri; Afzal Ansari; Apurvashin Puvar; Chaitanya Joshi; Dinesh Kumar; Harsh Bakshi; Harshadhai Parmar; Janvi Raval; Komal Patel; Labdhi Pandya; Madhvi Joshi; Maharshi Pandya; Monika Gandhi; Nidhi Patel; Nikha Trivedi; Nitin Savaliya; Pinal Trivedi; R D Dixit; Raghawendra Kumar; Zarna Patel; Zuber Salyed                                                                                                                                     |
| EPI_ISL_480072, EPI_ISL_691527                                                                                                                                                                                                                                                                                                                                                                                                                                                                                                                                                                   | Sakai City Institute of Public Health                                                  | Pathogen Genomics Center, National Institute of Infectious Diseases                                                                              | Hajime Kamiya; Kentaro Itokawa; Makoto Kuroda; Masanori Hashino; Motoi Suzuki; Rina Tanaka; Tatsuya Miyoshi; Tsuyoshi Sekizuka                                                                                                                                                                                                                                                                                                                           |
| EPI_ISL_1824065                                                                                                                                                                                                                                                                                                                                                                                                                                                                                                                                                                                  | San Gallicano Dermatological Institute I.F.O.                                          | INMI Lazzaro Spallanzani IRCCS                                                                                                                   | A Massacci; B Bartolini; E Giombini; E Sperandio; F Santini; G Bonfiglio; GF Inger; M Pallocca                                                                                                                                                                                                                                                                                                                                                           |
| EPI_ISL_479800                                                                                                                                                                                                                                                                                                                                                                                                                                                                                                                                                                                   | Sapporo City Institute of Public Health                                                | Pathogen Genomics Center, National Institute of Infectious Diseases                                                                              | Asami Ohnishi; Hajime Kamiya; Kentaro Itokawa; Makoto Kuroda; Masanori Hashino; Motoi Suzuki; Rina Tanaka; Tsuyoshi Sekizuka                                                                                                                                                                                                                                                                                                                             |
| EPI_ISL_661185, EPI_ISL_676601                                                                                                                                                                                                                                                                                                                                                                                                                                                                                                                                                                   | Scientific Veterinary Institute Novi Sad                                               | Veterinary Specialized Institute "Krajijevo", Serbia                                                                                             | Afonso, C.; Banovic Djeri, B.; Jankovic, M.; Jovanovic, T.; Knezevic, A.; Petrovic, T.; Sekler, M.; Tesovic, B.; Vidanovic, D.; Volkening, J.                                                                                                                                                                                                                                                                                                            |
| EPI_ISL_696515                                                                                                                                                                                                                                                                                                                                                                                                                                                                                                                                                                                   | Sedgefield Clinic wc SGE & NHL/UCT                                                     | KRISP, KZN Research Innovation and Sequencing Platform                                                                                           | Arash Iranzadeh; Bruna Galvaio; Carolyn Williamson; Deelan Doolabh; Diana Hardie; Emanuel James San; Houriyah Tegally; Innocent Mudau; Jennifer Giandhari; Kruger Marais; Lynn Tyers; Marvin Hsiao; Stephen Korsman; Sureshnee Pillay; Tulio de Oliveira                                                                                                                                                                                                 |
| EPI_ISL_849366, EPI_ISL_2135170, EPI_ISL_2140067, EPI_ISL_2140071,                                                                                                                                                                                                                                                                                                                                                                                                                                                                                                                               | Servicio Virosis Respiratorias- Departamento Virologia-INEI                            | Instituto Nacional Enfermedades Infecciosas C.G.Malbran                                                                                          | Avaro M.; Baumeister E.; Benedetti E.; Campos J.; Cisterna D.; Dattero ME; Lorenzo F.; Molina V.; Perandones C.; Poklepovich T.; Pontoriero A.; Russo M.; Tuduri E.                                                                                                                                                                                                                                                                                      |

|                                                                                                                                                                                                                                                                                |                                                                                                                                                                                                                                |                                                                                                                                                                                                                                |                                                                                                                                                                                                                                                                                                                                                                                                                                                                                        |                                                                                                                                                                                                                                                                                                                                                                                                                                                                                                              |
|--------------------------------------------------------------------------------------------------------------------------------------------------------------------------------------------------------------------------------------------------------------------------------|--------------------------------------------------------------------------------------------------------------------------------------------------------------------------------------------------------------------------------|--------------------------------------------------------------------------------------------------------------------------------------------------------------------------------------------------------------------------------|----------------------------------------------------------------------------------------------------------------------------------------------------------------------------------------------------------------------------------------------------------------------------------------------------------------------------------------------------------------------------------------------------------------------------------------------------------------------------------------|--------------------------------------------------------------------------------------------------------------------------------------------------------------------------------------------------------------------------------------------------------------------------------------------------------------------------------------------------------------------------------------------------------------------------------------------------------------------------------------------------------------|
| EPI_ISL_2158745                                                                                                                                                                                                                                                                |                                                                                                                                                                                                                                |                                                                                                                                                                                                                                |                                                                                                                                                                                                                                                                                                                                                                                                                                                                                        |                                                                                                                                                                                                                                                                                                                                                                                                                                                                                                              |
| EPI_ISL_691645                                                                                                                                                                                                                                                                 | Servicio de Microbiología, Hospital Universitario Son Espases                                                                                                                                                                  | SeqCOVID-SPAIN consortium/IBV(CSIC)                                                                                                                                                                                            |                                                                                                                                                                                                                                                                                                                                                                                                                                                                                        | Antonio Oliver and SeqCOVID-SPAIN consortium; Carla López-Causapé; Jordi Reina                                                                                                                                                                                                                                                                                                                                                                                                                               |
| EPI_ISL_419687                                                                                                                                                                                                                                                                 | Servicio de Microbiología, Consorcio Hospital General Universitario de Valencia                                                                                                                                                | Sequencing and Bioinformatics Service and Molecular Epidemiology Research Group, FISABIO-Public Health                                                                                                                         |                                                                                                                                                                                                                                                                                                                                                                                                                                                                                        | Concepcion Gimeno; Fernando Gonzalez-Candelas; Giuseppe D'Auria; Griselda De Marco; Maria Alma Bracho; Maria Dolores Ocete; Neris Garcia-Gonzalez                                                                                                                                                                                                                                                                                                                                                            |
| EPI_ISL_500322, EPI_ISL_509615                                                                                                                                                                                                                                                 | Servicio de Microbiología, Hospital Universitario Donostia. OSI Donostialdea. Área de Enfermedades Infecciosas, Grupo de Infección Respiratoria y Resistencia Antimicrobiana. Instituto de Investigación Sanitaria Biodonostia | SeqCOVID-SPAIN consortium/IBV(CSIC)                                                                                                                                                                                            |                                                                                                                                                                                                                                                                                                                                                                                                                                                                                        | Gustavo Cilla; Jose Maria Marimón and SeqCOVID-SPAIN consortium; Luis Piñeiro; Milagrosa Montes                                                                                                                                                                                                                                                                                                                                                                                                              |
| EPI_ISL_2567026                                                                                                                                                                                                                                                                | Shamir Medical Center (Asaf Harofe)                                                                                                                                                                                            | Shamir Medical Center (Asaf Harofe)                                                                                                                                                                                            |                                                                                                                                                                                                                                                                                                                                                                                                                                                                                        | Abu Hamad Ramzia; Adina Bar Chaim; Anna Vishnevsky; Chen Weiner; Nir Rainy; Patricia Benveniste-Lekovitz; Reut Sorek Abramovich; Yevgeni Yegorov                                                                                                                                                                                                                                                                                                                                                             |
| EPI_ISL_416385                                                                                                                                                                                                                                                                 | Shanghai Public Health Clinical Center, Shanghai Medical College, Fudan University                                                                                                                                             | National Research Center for Translational Medicine (Shanghai), Ruijin Hospital affiliated to Shanghai jiao Tong University School of Medicine & Shanghai Public Health Clinical Center                                        |                                                                                                                                                                                                                                                                                                                                                                                                                                                                                        | Gang Lu; Hongzhou Lu; Saijuan Chen; Shengyue Wang; Xionan Zhang; Yun Ling; Yun Tan                                                                                                                                                                                                                                                                                                                                                                                                                           |
| EPI_ISL_582125                                                                                                                                                                                                                                                                 | Sheikh Khalifa Medical City                                                                                                                                                                                                    | Molecular Surveillance lab Sheikh Khalifa Medical City                                                                                                                                                                         |                                                                                                                                                                                                                                                                                                                                                                                                                                                                                        | Amirtharaj Francis; Hala Imambaccus; Hiba Saud; Sahar Almarzooqi; Sajeed Abdul; Stefan Weber                                                                                                                                                                                                                                                                                                                                                                                                                 |
| EPI_ISL_2086224, EPI_ISL_2086227                                                                                                                                                                                                                                               | ShipMed Inc                                                                                                                                                                                                                    | KRISP, KZN Research Innovation and Sequencing Platform                                                                                                                                                                         |                                                                                                                                                                                                                                                                                                                                                                                                                                                                                        | Emmanuel SJ; Giandhari J; Lessells R; Naidoo Y; Pillay S; Ramphal U; Tegally H; Wilkinson E; de Oliveira T                                                                                                                                                                                                                                                                                                                                                                                                   |
| EPI_ISL_500570                                                                                                                                                                                                                                                                 | Singapore General Hospital                                                                                                                                                                                                     | Department of Microbiology                                                                                                                                                                                                     |                                                                                                                                                                                                                                                                                                                                                                                                                                                                                        | Chenhao Li; Karrie Ko; Kern Rei Chng; Kian Sing Chan; Kun Lee Lim; Lynette Oon; Niranjan Nagarajan; Nurdyana Abdul Rahman                                                                                                                                                                                                                                                                                                                                                                                    |
| EPI_ISL_1284814                                                                                                                                                                                                                                                                | Sonic - MVZ Medizinisches Labor Bremen GmbH                                                                                                                                                                                    | Robert Koch Institute                                                                                                                                                                                                          |                                                                                                                                                                                                                                                                                                                                                                                                                                                                                        |                                                                                                                                                                                                                                                                                                                                                                                                                                                                                                              |
| EPI_ISL_667804, EPI_ISL_1904462                                                                                                                                                                                                                                                | South Eastern Area Laboratory Services (SEALS)                                                                                                                                                                                 | NSW Health Pathology - Institute of Clinical Pathology and Medical Research; Westmead Hospital; University of Sydney                                                                                                           |                                                                                                                                                                                                                                                                                                                                                                                                                                                                                        | CIDM-PH et al.                                                                                                                                                                                                                                                                                                                                                                                                                                                                                               |
| EPI_ISL_2928014, EPI_ISL_2928016, EPI_ISL_2928017, EPI_ISL_2928018, EPI_ISL_2928020, EPI_ISL_2928021, EPI_ISL_2928025, EPI_ISL_2928026, EPI_ISL_2928027                                                                                                                        | see above                                                                                                                                                                                                                      | South Sudan Ministry of Health, WHO South Sudan, MRC/UVRI & LSHTM Uganda Research Unit                                                                                                                                         | Abe G. Abias; Dan Lule Bugembe; Dennis Kenyi Lodiongo; James Ayei; John Rumunu; Joseph Francis Wamala; Juma John HM; Lul Lojok Deng; Matthew Cotten; My V.T. Phan; Pontiano Kaleebu; Richard Lino Loro Lako; Sudhir Bunga                                                                                                                                                                                                                                                              |                                                                                                                                                                                                                                                                                                                                                                                                                                                                                                              |
| EPI_ISL_3127444, EPI_ISL_3127445                                                                                                                                                                                                                                               | State Key Laboratory for Diagnosis and Treatment of Infectious Diseases, National Clinical Research Center for Infectious Diseases, First Affiliated Hospital, Zhejiang University School of Medicine, Hangzhou, China. 310003 | State Key Laboratory for Diagnosis and Treatment of Infectious Diseases, National Clinical Research Center for Infectious Diseases, First Affiliated Hospital, Zhejiang University School of Medicine, Hangzhou, China. 310003 | Changzhong Jin; Danrong Shi; Fumin Liu; Haibo Wu; Hangping Yao; Keda Chen; Keda Chen ; Zhigang Wu; Lanjuan Li; Linfang Cheng; Min Zheng; Nanping Wu; Shibo Li; Tianhao Weng; Tianhao Weng ; Danrong Shi ; Linfang Cheng; Xiangyun Lu; Zhigang Wu                                                                                                                                                                                                                                       |                                                                                                                                                                                                                                                                                                                                                                                                                                                                                                              |
| EPI_ISL_2779639                                                                                                                                                                                                                                                                | State Key Laboratory of Emerging Infectious Diseases, The University of Hong Kong                                                                                                                                              | The University of Hong Kong                                                                                                                                                                                                    |                                                                                                                                                                                                                                                                                                                                                                                                                                                                                        | Huachen Zhu; Lifeng Li; Yi Guan; Yiu Man Cheung                                                                                                                                                                                                                                                                                                                                                                                                                                                              |
| EPI_ISL_2716628                                                                                                                                                                                                                                                                | State Key Laboratory of Pathogen and Biosecurity, Beijing Institute of Microbiology and Epidemiology                                                                                                                           | State Key Laboratory of Pathogen and Biosecurity, Beijing Institute of Microbiology and Epidemiology                                                                                                                           |                                                                                                                                                                                                                                                                                                                                                                                                                                                                                        | Campbell, A.; Campbell, J.; Gevao; Harding, D.; Lin, L.; Liu, Y.; P.F.; P.S.; Rogers, J.; Sahr; Wurie, I.; Zhang, J.                                                                                                                                                                                                                                                                                                                                                                                         |
| EPI_ISL_2375923                                                                                                                                                                                                                                                                | Stellenbosch Hospital wc STB                                                                                                                                                                                                   | NHLS/UCT                                                                                                                                                                                                                       |                                                                                                                                                                                                                                                                                                                                                                                                                                                                                        | Arash Iranzadeh; Bruna Galvao; Carolyn Williamson; Deelan Doolabh; Diana Hardie; Innocent Mudau; Kruger Marais; Lynn Tyers; Marvin Hsiao; Stephen Korsman                                                                                                                                                                                                                                                                                                                                                    |
| EPI_ISL_2032727, EPI_ISL_2278852, EPI_ISL_2418316, EPI_ISL_2418755, EPI_ISL_2419788                                                                                                                                                                                            | Swedish national genomic surveillance program of SARS-CoV-2                                                                                                                                                                    | The Public Health Agency of Sweden                                                                                                                                                                                             |                                                                                                                                                                                                                                                                                                                                                                                                                                                                                        | Alma Brolund; Maria Lind Karlberg; Maximilian Riess; Swedish national genomic surveillance program of SARS-CoV-2                                                                                                                                                                                                                                                                                                                                                                                             |
| EPI_ISL_2462426, EPI_ISL_2462429                                                                                                                                                                                                                                               | Sydney South West Pathology Service (SSWPS) - Royal Prince Alfred Hospital - NSW Health Pathology                                                                                                                              | NSW Health Pathology - Institute of Clinical Pathology and Medical Research; Westmead Hospital; University of Sydney                                                                                                           |                                                                                                                                                                                                                                                                                                                                                                                                                                                                                        | CIDM-PH et al.                                                                                                                                                                                                                                                                                                                                                                                                                                                                                               |
| EPI_ISL_1159230                                                                                                                                                                                                                                                                | Synergy Laboratories                                                                                                                                                                                                           | Synergy Laboratories                                                                                                                                                                                                           |                                                                                                                                                                                                                                                                                                                                                                                                                                                                                        | Megan Cornwell                                                                                                                                                                                                                                                                                                                                                                                                                                                                                               |
| EPI_ISL_2545909, EPI_ISL_2547038, EPI_ISL_2788800, EPI_ISL_2788837                                                                                                                                                                                                             | Synlab Eesti OÜ                                                                                                                                                                                                                | 1. Laboratory of Communicable Diseases (Estonia); 2. Eurofins Genomics Europe Sequencing GmbH                                                                                                                                  |                                                                                                                                                                                                                                                                                                                                                                                                                                                                                        | Lidia Dotsenko et al.                                                                                                                                                                                                                                                                                                                                                                                                                                                                                        |
| EPI_ISL_1787536                                                                                                                                                                                                                                                                | Synlab Haut de France                                                                                                                                                                                                          | UMR 8199/1283 EGID                                                                                                                                                                                                             |                                                                                                                                                                                                                                                                                                                                                                                                                                                                                        | Derhourhi Mehdi                                                                                                                                                                                                                                                                                                                                                                                                                                                                                              |
| EPI_ISL_2662581, EPI_ISL_2662589, EPI_ISL_2709945, EPI_ISL_2709948, EPI_ISL_2709956, EPI_ISL_2709990, EPI_ISL_2827054, EPI_ISL_2827152                                                                                                                                         | see above                                                                                                                                                                                                                      | TAMBO MEMORIAL LABORATORY                                                                                                                                                                                                      | National Institute for Communicable Diseases of the National Health Laboratory Service                                                                                                                                                                                                                                                                                                                                                                                                 | Amoako DG; Bhiman JN; Everatt J; Ismail A; Mahlangu B; Mnguni A; Mohale T; Ntuli N; Scheepers C                                                                                                                                                                                                                                                                                                                                                                                                              |
| EPI_ISL_1196006                                                                                                                                                                                                                                                                | TLC Clinic                                                                                                                                                                                                                     | National Institute for Communicable Diseases of the National Health Laboratory Service                                                                                                                                         |                                                                                                                                                                                                                                                                                                                                                                                                                                                                                        | Amoako DG; Bhiman JN; Ismail A; Mahlangu B; Maphalala GP; Mohale T; Ntuli N; Scheepers C                                                                                                                                                                                                                                                                                                                                                                                                                     |
| EPI_ISL_2693000, EPI_ISL_2693004, EPI_ISL_2693006                                                                                                                                                                                                                              | TSGH-CP molecular lab                                                                                                                                                                                                          | TSGH-CP molecular lab                                                                                                                                                                                                          |                                                                                                                                                                                                                                                                                                                                                                                                                                                                                        | Cherng-Lih Perng; Chien-Wen Chen; Chih-Kai Chang; Feng-Yee Chang; Hsing-Yi Chung; Hung-Sheng Shang; Jung-Chung Lin; Kuo-Ming Yeh; Kuo-Sheng Hung; Ming-Jr JIAn; Sheng-Kang Chiu; Shih-Hung Tsai; Tien-Yao Chang                                                                                                                                                                                                                                                                                              |
| EPI_ISL_3105872                                                                                                                                                                                                                                                                | Taguig City Health Office                                                                                                                                                                                                      | Research Institute for Tropical Medicine                                                                                                                                                                                       | Clyde Daput; Deana Mae Ocampo; Emmanuel Kagning Tsinda; Francisco Gerardo Polotan; Hitoshi Oshitani; Inez Andrea Medado; Jefferson Earl Halog; Joana Ina Manalo; Lei Lanna Dancel; Ma Angelica Tujan; Mariko Saito-Obata; Mayuko Saito; Michiko Okamoto; Samantha Louise Bado                                                                                                                                                                                                          |                                                                                                                                                                                                                                                                                                                                                                                                                                                                                                              |
| EPI_ISL_1388124                                                                                                                                                                                                                                                                | Team W                                                                                                                                                                                                                         | University Hospital Basel, Clinical Bacteriology                                                                                                                                                                               |                                                                                                                                                                                                                                                                                                                                                                                                                                                                                        | Adrian Egli; Alfredo Mari; Hans Hirsch; Helena MB Seth-Smith; Julia Bielicki; Karoline Leuzinger; Madlen Stange; Manuel Battegay; Simon Fuchs; Tim Roloff                                                                                                                                                                                                                                                                                                                                                    |
| EPI_ISL_966940                                                                                                                                                                                                                                                                 | Technical Support Units for Scientific Research (UATRS), National Centre for Scientific and Technical Research (CNRST)                                                                                                         | Technical Support Units for Scientific Research (UATRS), National Centre for Scientific and Technical Research (CNRST)                                                                                                         |                                                                                                                                                                                                                                                                                                                                                                                                                                                                                        | Alaoui; Elalaoui; Elannaz, H.; Elouanass, M.; Ennibi; H. and El Fahime, E.; Hemlali, M.; Lahlou, M.A.; Melloul, M.; Rfaki, A.; S.A.; Touil, N.; a.I.                                                                                                                                                                                                                                                                                                                                                         |
| EPI_ISL_2611673, EPI_ISL_2931340                                                                                                                                                                                                                                               | Temporary Specimen Collection Centre at the AsiaWorld-Expo                                                                                                                                                                     | Hong Kong Department of Health                                                                                                                                                                                                 |                                                                                                                                                                                                                                                                                                                                                                                                                                                                                        | Alan K.L. Tsang; Dominic N.C. Tsang; Edman T.K. Lam; Ken H.L. Ng; Peter C.W. Yip; Rickjason C.W. Chan                                                                                                                                                                                                                                                                                                                                                                                                        |
| EPI_ISL_1969991                                                                                                                                                                                                                                                                | Thai Red Cross Emerging Infectious Diseases Health Science Centre, Chulalongkorn Hospital, Faculty of Medicine, Chulalongkorn University                                                                                       | Thai Red Cross Emerging Infectious Diseases Center and Faculty of Medicine, Chulalongkorn University                                                                                                                           |                                                                                                                                                                                                                                                                                                                                                                                                                                                                                        | Anthony R. Jones; Chonticha Klungthong; Khajohn Joonlasak; Opass Putcharoen; Piyawan Chinnawirotpisan; Rome Buathong; Sopon Iamsirithaworn; Stefan Fernandez; Supaporn Wacharapluesadee; Wichai Thanasopon; Wudtichai Manasatienkij                                                                                                                                                                                                                                                                          |
| EPI_ISL_756357, EPI_ISL_1490226, EPI_ISL_2230689, EPI_ISL_2230694, EPI_ISL_2230696, EPI_ISL_2478949, EPI_ISL_2478964, EPI_ISL_2545191, EPI_ISL_2545194                                                                                                                         | see above                                                                                                                                                                                                                      | The Caribbean Public Health Agency                                                                                                                                                                                             | Carrington Lab, Department of PreClinical Sciences, Faculty of Medical Sciences, The University of the West Indies                                                                                                                                                                                                                                                                                                                                                                     | Adesh Ramsubbhag; Anushka Ramjag; Arianne Brown-Jordan; Avery Hinds; Chinna Chinnadurai; Christine V. F. Carrington; Christopher Oura; Gabriel Escobar; Jaya Jayaraman; Jerome Foster; Karla Georges; Kenneth George; Marsha Ivey; Naresh Nandram; Narine Singh; Nikita S. D. Sahadeo; Nuno Faria; Oliver Pybus; Rahul Naidu; Rajini Haraksingh; Rhonda Sealey-Thomas; Risha Singh; Roshan Parasram; Sarah Hill; Sharon Belmar-George; Shawin Charles; Stanley Giddings; SueMin Nathaniel; Vernie Ramkissoon |
| EPI_ISL_2621679, EPI_ISL_2626658, EPI_ISL_2626661                                                                                                                                                                                                                              | The Caribbean Public Health Agency                                                                                                                                                                                             | Carrington Lab, Department of Preclinical Sciences, Faculty of Medical Sciences, The University of the West Indies                                                                                                             | Anushka Ramjag; Arianne Brown-Jordan; Avery Hinds; Christine V. F. Carrington; Christopher Oura; Gabriel Escobar; Karla Georges; Kenneth George; Naresh Nandram; Nikita S. D. Sahadeo; Nuno Faria; Oliver Pybus; Risha Singh; Sarah Hill; Sharon Belmar-George; SueMin Nathaniel; Vernie Ramkissoon                                                                                                                                                                                    |                                                                                                                                                                                                                                                                                                                                                                                                                                                                                                              |
| EPI_ISL_2649754, EPI_ISL_2649790, EPI_ISL_2658357, EPI_ISL_2658366, EPI_ISL_2678129, EPI_ISL_2678165, EPI_ISL_2678168, EPI_ISL_2678169, EPI_ISL_2678171, EPI_ISL_2716569, EPI_ISL_2716570, EPI_ISL_2756572, EPI_ISL_2756582, EPI_ISL_2955590, EPI_ISL_2967981, EPI_ISL_2967984 | see above                                                                                                                                                                                                                      | The Caribbean Public Health Agency                                                                                                                                                                                             | Carrington Lab, Department of Preclinical Sciences, Faculty of Medical Sciences, The University of the West Indies, St Augustine Campus                                                                                                                                                                                                                                                                                                                                                | Anushka Ramjag; Arianne Brown-Jordan; Avery Hinds; Christine V. F. Carrington; Christopher Oura; Gabriel Escobar; Hazel Laws; Jacqueline Bisesor-McKenzie; Karla Georges; Kenneth George; Naresh Nandram; Nikita S. D. Sahadeo; Nuno Faria; Oliver Pybus; Rhonda Sealey-Thomas; Risha Singh; Roshan Parasram; Sarah Hill; Sharon Belmar-George; Simone Keizer-Beache; SueMin Nathaniel; Vernie Ramkissoon                                                                                                    |
| EPI_ISL_1838080                                                                                                                                                                                                                                                                | The National Centre for Cell Science                                                                                                                                                                                           | CSIR-Centre for Cellular and Molecular Biology-INSACOG                                                                                                                                                                         | Ajay Pillai; Amareshwar Vodapalli; Ara Sreenivas; Archana Bharadwaj Siva; B Himasi; Blessy B John; Diraj Paul; Divya Tej Sowpati; INSACOG Consortium team; Karthik Bharadwaj Tallapaka; Lamuk Zaveri; Manoj Kumar Bhat; Mitali Inamdard; Mohak P Gujare; Onkar Kulkarni; Payel Mukherjee; Rakesh K Mishra; Sharath Chandra Thota; Shivang P. Bhanushali; Shreekant Verma; Sofia Banu; Sonal Manik Chavan; Tulasi Nagabandi; Valli Nagalakshmi Udamatla; Viswagithe S L; Yogesh Shouche |                                                                                                                                                                                                                                                                                                                                                                                                                                                                                                              |
| EPI_ISL_577628, EPI_ISL_577633, EPI_ISL_693682                                                                                                                                                                                                                                 | The National Institute of Public Health                                                                                                                                                                                        | State Veterinary Institute Prague                                                                                                                                                                                              |                                                                                                                                                                                                                                                                                                                                                                                                                                                                                        | A; D; H; J; Jirincova; L; Nagy; Novakova; Trnka; Vecerova                                                                                                                                                                                                                                                                                                                                                                                                                                                    |



|                                                                                                                                                                                                                                                                                                                                                                                                                                                                                                                                                                                                                                                                                                    |                                                                                                                                  |                                                                                                                                    |                                                                                                                                                                                                                                                                                                                                                                                                                                                                                                                                                                                                                                                                                                                                                                                                                                                                             |
|----------------------------------------------------------------------------------------------------------------------------------------------------------------------------------------------------------------------------------------------------------------------------------------------------------------------------------------------------------------------------------------------------------------------------------------------------------------------------------------------------------------------------------------------------------------------------------------------------------------------------------------------------------------------------------------------------|----------------------------------------------------------------------------------------------------------------------------------|------------------------------------------------------------------------------------------------------------------------------------|-----------------------------------------------------------------------------------------------------------------------------------------------------------------------------------------------------------------------------------------------------------------------------------------------------------------------------------------------------------------------------------------------------------------------------------------------------------------------------------------------------------------------------------------------------------------------------------------------------------------------------------------------------------------------------------------------------------------------------------------------------------------------------------------------------------------------------------------------------------------------------|
| EPI_ISL_424583, EPI_ISL_828618                                                                                                                                                                                                                                                                                                                                                                                                                                                                                                                                                                                                                                                                     | The National University Hospital of Iceland                                                                                      | deCODE genetics                                                                                                                    | Agnar Helgason; Alma Moller; Anna B Agustsdottir; Arnaldur Gylfason; Asger Sigurdsson; Aslaug Jonasdottir; Berglind Eirisdottir; Bjarni Thorbjornsson; Brynjar O Jenson; Daniel F Gudbjartsson; Droplaug N Magnúsdottir; Elisabet E Gardarsdottir; Emil A Thorarensen; Gardar Sveinbjornsson; Gisli Masson; Gudmundur Georgsson; Gudmundur L Norddahl; Gudrun Sigmundsdottir; Hakon Jonsson; Hannes Eggertsson; Hilma Holm; Ingileif Jonsdottir; Jona Saemundsdottir; Kamilla S Josefsdottir; Karl Stefanon; Karl G Kristinnson; Kjartan R Gudmundsson; Kristin E Sveinsdottir; Kristin E Sveinsdottir; Louise le Roux; Maney Sveinsdottir; Olafía S Gretarsdottir; Olafía S Gretarsdottir; Olafur T Magnusson; Pall Meisted; Patrick Sulem; Run Fridriksdottir; Solvi Rognvaldsson; Thora R Gunnarsdottir; Thorud Kristjansson; Thorolfur Gudnason; Unnur Thorsteinsdottir |
| EPI_ISL_754229                                                                                                                                                                                                                                                                                                                                                                                                                                                                                                                                                                                                                                                                                     | The Republican Research and Practical Center for Epidemiology and Microbiology (RRPCEM)                                          | WHO National Influenza Centre Russian Federation                                                                                   | Anatoly Krasko; Andrey Komissarov; Anna Ivanova; Artem Fadeev; Daria Danilenko; Dmitry Bazhenov; Dmitry Lioznov; Elena Gasich; Elena Nabeiva; Georgii Bazynkin; Kirill Bulda; Ksenia Safina; Kseniya Komissarova                                                                                                                                                                                                                                                                                                                                                                                                                                                                                                                                                                                                                                                            |
| EPI_ISL_906060                                                                                                                                                                                                                                                                                                                                                                                                                                                                                                                                                                                                                                                                                     | Tilia Laboratories s.r.o.                                                                                                        | Tilia Laboratories s.r.o.                                                                                                          | MD; PhD.; Sona Pekova                                                                                                                                                                                                                                                                                                                                                                                                                                                                                                                                                                                                                                                                                                                                                                                                                                                       |
| EPI_ISL_2779295                                                                                                                                                                                                                                                                                                                                                                                                                                                                                                                                                                                                                                                                                    | Trans Nozia hospital                                                                                                             | USAMRD-A, Basic Science Laboratory                                                                                                 | Alan Lemtudo; Beth Mutai; Brian Andika; Carol Kifude; Clement Masakwe; Eric Muthanje; Esther Omusei; Faith Sige; Gathii Kimita; George Awinda; John Waitumbi; Josphat Nyataya; Rachel Githii; Rehema Liyai; Stephen Ochola                                                                                                                                                                                                                                                                                                                                                                                                                                                                                                                                                                                                                                                  |
| EPI_ISL_756363, EPI_ISL_2230685                                                                                                                                                                                                                                                                                                                                                                                                                                                                                                                                                                                                                                                                    | Trinidad Public Health Laboratory                                                                                                | Carrington Lab, Department of PreClinical Sciences, Faculty of Medical Sciences, The University of the West Indies                 | Adesh Ramsuhbag; Arianne Brown-Jordan; Avery Hinds; Chinna Chinnadurai; Christine V. F. Carrington; Christopher Oura; Gabriel Escobar; Jaya Jayaraman; Jerome Foster; Karla Georges; Marsha Ivey; Naresh Nandram; Nikita S. D. Sahadeo; Nuno Faria; Oliver Pybus; Rahul Naidu; Rajini Haraksingh; Risha Singh; Roshan Parasram; Sarah Hill; Stanley Giddings; SueMin Nathaniel; Vernie Ramkissoon                                                                                                                                                                                                                                                                                                                                                                                                                                                                           |
| EPI_ISL_960152                                                                                                                                                                                                                                                                                                                                                                                                                                                                                                                                                                                                                                                                                     | Tshwaragano Hospital                                                                                                             | National Health Laboratory Service/UCT                                                                                             | Arash Iranzadeh; Bruna Galvao; Carolyn Williamson; Deelan Doolabh; Diana Hardie; Innocent Mudau; Kruger Marais; Lynn Tyers; Marvin Hsiao; Stephen Korsman                                                                                                                                                                                                                                                                                                                                                                                                                                                                                                                                                                                                                                                                                                                   |
| EPI_ISL_2802112                                                                                                                                                                                                                                                                                                                                                                                                                                                                                                                                                                                                                                                                                    | Tygerdal                                                                                                                         | NHLS/UCT                                                                                                                           | Arash Iranzadeh; Bruna Galvao; Carolyn Williamson; Deelan Doolabh; Diana Hardie; Gert Marais; Innocent Mudau; Lynn Tyers; Marvin Hsiao; Stephen Korsman                                                                                                                                                                                                                                                                                                                                                                                                                                                                                                                                                                                                                                                                                                                     |
| EPI_ISL_3214676                                                                                                                                                                                                                                                                                                                                                                                                                                                                                                                                                                                                                                                                                    | U.O. Microbiologia Laboratorio Unico Centro Servizi - AUSL della Romagna                                                         | U.O. Microbiologia, Laboratorio Unico Centro Servizi - AUSL della Romagna                                                          | Giorgio Dirani                                                                                                                                                                                                                                                                                                                                                                                                                                                                                                                                                                                                                                                                                                                                                                                                                                                              |
| EPI_ISL_2694568                                                                                                                                                                                                                                                                                                                                                                                                                                                                                                                                                                                                                                                                                    | UAB "Baltic Medics"                                                                                                              | National Public Health Surveillance Laboratory                                                                                     | Ana Steponkiene; Danas Baksa; Jelena Razmuk; Lukas Vasionis; Lukas Zemaitis; Migle Gabrielaite; Svajune Muralyte                                                                                                                                                                                                                                                                                                                                                                                                                                                                                                                                                                                                                                                                                                                                                            |
| EPI_ISL_2625891                                                                                                                                                                                                                                                                                                                                                                                                                                                                                                                                                                                                                                                                                    | UAB Diagnostikos laboratorija                                                                                                    | Institute of Biotechnology, Life Sciences Center, Vilnius University                                                               | Emilija Vasilunaite__Milda Norkiene__Danguole Ziogiene__Albertas Timinkas__Alma Gedvilaite                                                                                                                                                                                                                                                                                                                                                                                                                                                                                                                                                                                                                                                                                                                                                                                  |
| EPI_ISL_2812359, EPI_ISL_2812363, EPI_ISL_2812364, EPI_ISL_2812367, EPI_ISL_2812373, EPI_ISL_2812374, EPI_ISL_2812384, EPI_ISL_2812389, EPI_ISL_2812401, EPI_ISL_2812405, EPI_ISL_2812413, EPI_ISL_2812413, EPI_ISL_2812427, EPI_ISL_2812428, EPI_ISL_2812429, EPI_ISL_2812431, EPI_ISL_2812436, EPI_ISL_281639, EPI_ISL_2841640                                                                                                                                                                                                                                                                                                                                                                   | see above                                                                                                                        | UFS Virology                                                                                                                       | GIANDHARI Jennifer; Naidoo Yeshnee; Pillay Sureshnee; San James; Tegally Houriyah; Tshabulla Derek; Wilkinson Eduan; Yajna Ramphal; de Oliveira Tulio John O. Gyapong and the UHAS COVID-19 Lab Team; Jones Gyamfi; Kwabena O. Duedu; Reuben Ayivor-Djanie                                                                                                                                                                                                                                                                                                                                                                                                                                                                                                                                                                                                                  |
| EPI_ISL_628760, EPI_ISL_861459                                                                                                                                                                                                                                                                                                                                                                                                                                                                                                                                                                                                                                                                     | UHAS COVID-19 Lab                                                                                                                | UHAS COVID-19 Lab                                                                                                                  |                                                                                                                                                                                                                                                                                                                                                                                                                                                                                                                                                                                                                                                                                                                                                                                                                                                                             |
| EPI_ISL_733234                                                                                                                                                                                                                                                                                                                                                                                                                                                                                                                                                                                                                                                                                     | UMMC-Health                                                                                                                      | WHO National Influenza Centre Russian Federation                                                                                   | Andrey Komissarov; Anna Ivanova; Artem Fadeev; Daria Danilenko; Dmitry Bazhenov; Dmitry Lioznov; Elena Nabeiva; Georgii Bazynkin; Ksenia Safina; Kseniya Komissarova; Tatiana Platonova                                                                                                                                                                                                                                                                                                                                                                                                                                                                                                                                                                                                                                                                                     |
| EPI_ISL_2131453                                                                                                                                                                                                                                                                                                                                                                                                                                                                                                                                                                                                                                                                                    | UMR190-Unité des virus émergents                                                                                                 | UMR190-Unité des virus émergents                                                                                                   | cecile Baronti                                                                                                                                                                                                                                                                                                                                                                                                                                                                                                                                                                                                                                                                                                                                                                                                                                                              |
| EPI_ISL_1290838, EPI_ISL_1312895                                                                                                                                                                                                                                                                                                                                                                                                                                                                                                                                                                                                                                                                   | UNIBIO                                                                                                                           | CNR Virus des Infections Respiratoires - France SUD                                                                                | Antonin Bal; Bruno Lina; Gregory Destras; Gwendolyne Burfin; Hadrien Regue; Laurence Josset; Martine Valette; Quentin Semanas                                                                                                                                                                                                                                                                                                                                                                                                                                                                                                                                                                                                                                                                                                                                               |
| EPI_ISL_1707511                                                                                                                                                                                                                                                                                                                                                                                                                                                                                                                                                                                                                                                                                    | UNIBIO ROMANS GAMBETTA                                                                                                           | CNR Virus des Infections Respiratoires - France SUD                                                                                | Antonin Bal; Bruno Lina; Gregory Destras; Gwendolyne Burfin; Hadrien Regue; Laurence Josset; Martine Valette; Quentin Semanas                                                                                                                                                                                                                                                                                                                                                                                                                                                                                                                                                                                                                                                                                                                                               |
| EPI_ISL_2661466, EPI_ISL_3375856, EPI_ISL_3375859                                                                                                                                                                                                                                                                                                                                                                                                                                                                                                                                                                                                                                                  | US Air Force School of Aerospace Medicine                                                                                        | US Air Force School of Aerospace Medicine                                                                                          | Amanda Javorina; Anthony Fries; Carol Garrett; Clarise Starr; Elizabeth Macias; Jennifer Meyer; Sarah Purves; William Gruner                                                                                                                                                                                                                                                                                                                                                                                                                                                                                                                                                                                                                                                                                                                                                |
| EPI_ISL_2617858                                                                                                                                                                                                                                                                                                                                                                                                                                                                                                                                                                                                                                                                                    | USC Clinical Lab                                                                                                                 | Los Angeles County Public Health Laboratories                                                                                      | P. Hemarajata et al.                                                                                                                                                                                                                                                                                                                                                                                                                                                                                                                                                                                                                                                                                                                                                                                                                                                        |
| EPI_ISL_734782, EPI_ISL_735094                                                                                                                                                                                                                                                                                                                                                                                                                                                                                                                                                                                                                                                                     | UZ Leuven, National Reference Laboratory for Coronaviruses, Laboratory Medicine, Leuven, Belgium                                 | KU Leuven, Rega Institute, Clinical and Epidemiological Virology                                                                   | Bert Vanmechelen; Joan Marti-Carreras; Piet Maes; Tony Wawina-Bokalanga                                                                                                                                                                                                                                                                                                                                                                                                                                                                                                                                                                                                                                                                                                                                                                                                     |
| EPI_ISL_737931, EPI_ISL_737953                                                                                                                                                                                                                                                                                                                                                                                                                                                                                                                                                                                                                                                                     | Uganda Central Public Health Lab and Uganda Virus Research Institute                                                             | MRC/UVRI & LSHTM Uganda Research Unit                                                                                              | Dan Lule Bugembe; Matthew Cotten; My V.T. Phan; Pontiano Kaleebu et al.                                                                                                                                                                                                                                                                                                                                                                                                                                                                                                                                                                                                                                                                                                                                                                                                     |
| EPI_ISL_451198                                                                                                                                                                                                                                                                                                                                                                                                                                                                                                                                                                                                                                                                                     | Uganda Virus Research Institute                                                                                                  | MRC/UVRI & LSHTM Uganda Research Unit                                                                                              | Beatrice Dhaala; Dan Lule Bugembe; Deogratius Ssenwanga; Henry Kyobe; Henry Mwebesa; Jane Aceng; John Kayiwa; Jonas Lexow; Julius Lutwama; Matthew Cotten; My V.T Phan; Phionah Tushabe; Pontiano Kaleebu; Stephen Balinandi                                                                                                                                                                                                                                                                                                                                                                                                                                                                                                                                                                                                                                                |
| EPI_ISL_615094                                                                                                                                                                                                                                                                                                                                                                                                                                                                                                                                                                                                                                                                                     | Umea klinisk mikrobiologi                                                                                                        | The Public Health Agency of Sweden                                                                                                 | Anna Risberg; Anna-Malin Linde; Karin Tegmark-Wisell; Maria Lind Karlberg; Mattias Haukland; Mia Brytting; Olov Svartstrom; Oskar Karlsson Lindsjö; Petra Edquist; Reza Advani; Sandra Brodsson                                                                                                                                                                                                                                                                                                                                                                                                                                                                                                                                                                                                                                                                             |
| EPI_ISL_3023848                                                                                                                                                                                                                                                                                                                                                                                                                                                                                                                                                                                                                                                                                    | Universidad Autonoma de Yucatan                                                                                                  | New York Genome Center                                                                                                             | Amy Baldwin; Andre Corvelo; Aviles-Gomez E; Ayora-Talavera G; Chan-Gasca M; Dayna M. Oschwald; Flores-Quintal F; Granja-Perez P; Lopez-Coral L; Michael Zody; Samantha Fennessey; Tom Maniatis; Villanueva-Jorge S; Yam-Pool E                                                                                                                                                                                                                                                                                                                                                                                                                                                                                                                                                                                                                                              |
| EPI_ISL_523812                                                                                                                                                                                                                                                                                                                                                                                                                                                                                                                                                                                                                                                                                     | Universidad Iberoamericana, Instituto de Medicina Tropical & Salud Global                                                        | International Centre for Genetic Engineering and Biotechnology (ICGEB) and ARGO Open Lab Platform                                  | Alejandro Vallejo Degaudenzi; Danilo Licastro; Eileen Riego; Leandro Tapia; Robert Paulino-Ramirez; Simeone Dal Monego; Sreejith Rajasekharan and Alessandro Marcello.; Victor Virgilio Calderon                                                                                                                                                                                                                                                                                                                                                                                                                                                                                                                                                                                                                                                                            |
| EPI_ISL_812967                                                                                                                                                                                                                                                                                                                                                                                                                                                                                                                                                                                                                                                                                     | University Clinical Research Center, University of Sciences                                                                      | University Clinical Research Center, University of Sciences                                                                        | A.A.; Bane, S.; Dao, S.; Diakite, M.; Diarra, B.; Doumbia, S.; Guindo, I.; Iknane; Kone, A.                                                                                                                                                                                                                                                                                                                                                                                                                                                                                                                                                                                                                                                                                                                                                                                 |
| EPI_ISL_998080                                                                                                                                                                                                                                                                                                                                                                                                                                                                                                                                                                                                                                                                                     | University College London, Great Ormond Street Hospital for Children NHS Foundation Trust, Imperial College Healthcare NHS Trust | COVID-19 Genomics UK (COG-UK) Consortium                                                                                           | Alison Holmes; Charlotte Williams; Helena Tutill; Jacqueline Findlay; James Price; Judith Breuer; Julianne Brown; Kathryn Harris; Leysa Forrest; Mark Kristiansen; Paola Niola; Paola Resende Silva; Patricia Dyal; Paul Randell; Rachel Williams; Samuel Weeks; Sergi Castellano; Sunando Roy; Tony Brooks; Yasmin Panchbhaya                                                                                                                                                                                                                                                                                                                                                                                                                                                                                                                                              |
| EPI_ISL_710570                                                                                                                                                                                                                                                                                                                                                                                                                                                                                                                                                                                                                                                                                     | University Hospital Dubrava                                                                                                      | Ruder Bošković Institute; Forensic Science Centre Ivan Vučetić; University of Zagreb Faculty of Science                            | Ana Livun; Antonela Blažeković; Boris Maček; Danilo Licastro; Dunja Glavaš; Fran Borovečki; Fuad Cosović; Gordana Maravić Vlahoviček; Ivan Šamija; Ivana Čelap; Jasna Kašman; Josipa Skelin; Katarina Marija Tupek; Kristian Vlahoviček; Kristina Gotovac Jerečić; Lidija Cvetko-Krajinović; Lucija Basić; Lucija Markulin; Maja Kuzman; Marina Korolija; Mario Stefanović; Mirjana Domazet-Lošo; Paula Štanc; Petra Vrabec; Robert Belužić; Rosa Karlić; Sanja Tadinac; Senčica Pejša; Tomislav Domazet-Lošo; Valentina Dumljan-Combaj; Vjekoslav Tomačić; Vladimir Krajinović; Zeljka Mačak Šafranko                                                                                                                                                                                                                                                                      |
| EPI_ISL_2790388                                                                                                                                                                                                                                                                                                                                                                                                                                                                                                                                                                                                                                                                                    | University Hospital Foca                                                                                                         | Public Health Institute of Republic of Srpska                                                                                      | Branka Culibrk; Dijana Vukajlović; Milica Celic; Pava Dimitrijević; Stanka Tomic; Tatjana Markovic; Zeljka Sumic                                                                                                                                                                                                                                                                                                                                                                                                                                                                                                                                                                                                                                                                                                                                                            |
| EPI_ISL_1533411, EPI_ISL_1811189                                                                                                                                                                                                                                                                                                                                                                                                                                                                                                                                                                                                                                                                   | University Hospitals of Geneva, Laboratory of Virology                                                                           | HUG, Laboratory of Virology and the Health2030 Genome Center                                                                       | Ana Rita Goncalves; Deborah Penet; Emmanouil Dermitzakis; Henri Pegeot; Ioannis Xenarios; Keith Harshman; Laurent Kaiser; Lorenzo Cerutti; Melyssa Elies; Samuel Cordey                                                                                                                                                                                                                                                                                                                                                                                                                                                                                                                                                                                                                                                                                                     |
| EPI_ISL_960093                                                                                                                                                                                                                                                                                                                                                                                                                                                                                                                                                                                                                                                                                     | University Medical Center Hamburg Eppendorf                                                                                      | Heinrich Pette Institute, Leibniz Institute for Experimental Virology                                                              | Adam Grundhoff; Alexis Robitaille; Johannes Knobloch; Martin Aepfelbacher; Nicole Fischer; Thomas Günther                                                                                                                                                                                                                                                                                                                                                                                                                                                                                                                                                                                                                                                                                                                                                                   |
| EPI_ISL_2864613                                                                                                                                                                                                                                                                                                                                                                                                                                                                                                                                                                                                                                                                                    | University of Health and Allied Sciences (UHAS) COVID-19 Testing and Research Centre                                             | University of Health and Allied Sciences (UHAS) COVID-19 Testing and Research Centre                                               | John O. Gyapong and the UHAS COVID-19 Lab Team; Jones Gyamfi; Kwabena O. Duedu; Reuben Ayivor-Djanie                                                                                                                                                                                                                                                                                                                                                                                                                                                                                                                                                                                                                                                                                                                                                                        |
| EPI_ISL_2242506, EPI_ISL_2242809, EPI_ISL_2243020, EPI_ISL_2243223                                                                                                                                                                                                                                                                                                                                                                                                                                                                                                                                                                                                                                 | University of Maiduguri Teaching Hospital                                                                                        | International Centre for Genetic Engineering and Biotechnology (ICGEB) and ARGO Open Lab for Genome Sequencing                     | Alessandro Marcello; Bamidele S Oderinde; Danilo Licastro; Emanuele Orsini; Galadima Gadzama; Marycelin M Baba; Monilade Akinola; Simeone Dal Monego; Zara Wuduri                                                                                                                                                                                                                                                                                                                                                                                                                                                                                                                                                                                                                                                                                                           |
| EPI_ISL_955142, EPI_ISL_955144                                                                                                                                                                                                                                                                                                                                                                                                                                                                                                                                                                                                                                                                     | University of Sarajevo, Veterinary Faculty, Laboratory for Molecular Diagnostic and Research Laboratory                          | University of Sarajevo, Veterinary Faculty, Laboratory for Molecular Diagnostic and Research Laboratory                            | Alić-Šeho A.; Goletić T.; Goletić Š.; Hodžić A.; Jažić A.; Nicević M.; Softić A.; Terzić I.; Terzić I.; Jažić A.; Šabić E.                                                                                                                                                                                                                                                                                                                                                                                                                                                                                                                                                                                                                                                                                                                                                  |
| EPI_ISL_485393                                                                                                                                                                                                                                                                                                                                                                                                                                                                                                                                                                                                                                                                                     | University of Ulsan College of Medicine and Asan Medical Center                                                                  | University of Ulsan College of Medicine and Asan Medical Center                                                                    | Heungsup Sung; Jaewoong Lee; Jina Lee; Jiwon Jung; Jongsik Chun; Kihyun Lee; Kuenyoul Park; Kyu-Hwa Hur; Mauricio Chailita; Mi-Na Kim; Seok-Hwan Yoon; Sung-Han Kim; and Hae Kyung Lee                                                                                                                                                                                                                                                                                                                                                                                                                                                                                                                                                                                                                                                                                      |
| EPI_ISL_977294, EPI_ISL_977337, EPI_ISL_977351, EPI_ISL_977372, EPI_ISL_2803448, EPI_ISL_2803514, EPI_ISL_2803517, EPI_ISL_2803518, EPI_ISL_2803521, EPI_ISL_2803583, EPI_ISL_2803584, EPI_ISL_2803607, EPI_ISL_2803610, EPI_ISL_2803629, EPI_ISL_2803630, EPI_ISL_2803631, EPI_ISL_2803632, EPI_ISL_2803635, EPI_ISL_2803636, EPI_ISL_2803638, EPI_ISL_2803639, EPI_ISL_2803645, EPI_ISL_2803646, EPI_ISL_2803666, EPI_ISL_2803673, EPI_ISL_2803677, EPI_ISL_2803678, EPI_ISL_2803681, EPI_ISL_2803682, EPI_ISL_2803683, EPI_ISL_2803695, EPI_ISL_2803701, EPI_ISL_2803711, EPI_ISL_2803718, EPI_ISL_2803720, EPI_ISL_2803724, EPI_ISL_2803728, EPI_ISL_2803730, EPI_ISL_2803731, EPI_ISL_2803743 | see above                                                                                                                        | UNZAVET and PATH                                                                                                                   | Daniel Bridges; Mulenga Mwendo-Chimfwembe; Ngonda Saasa; ZNPHI and ZGSC                                                                                                                                                                                                                                                                                                                                                                                                                                                                                                                                                                                                                                                                                                                                                                                                     |
| EPI_ISL_1348629, EPI_ISL_1348645                                                                                                                                                                                                                                                                                                                                                                                                                                                                                                                                                                                                                                                                   | Universitätsklinikum Heidelberg                                                                                                  | Robert Koch Institute                                                                                                              |                                                                                                                                                                                                                                                                                                                                                                                                                                                                                                                                                                                                                                                                                                                                                                                                                                                                             |
| EPI_ISL_2840601                                                                                                                                                                                                                                                                                                                                                                                                                                                                                                                                                                                                                                                                                    | Urban Institute for Disease Prevention and Control                                                                               | National Institute of Health, Department of Medical Sciences, Ministry of Public Health, Thailand                                  | ; Natchaya Khiahsang; Nuttida Thongpramol; Pakorn Pimontong; Pilailuk Okada; Ratana Tacharoenmuang; Siripaporn Phuyung; Sittiporn Parmmen; Sunthareeya Waicharoen; Thanutsapa Thanadachakul; Warawan Wongboot; sirikanda wimol                                                                                                                                                                                                                                                                                                                                                                                                                                                                                                                                                                                                                                              |
| EPI_ISL_2382664, EPI_ISL_2382671                                                                                                                                                                                                                                                                                                                                                                                                                                                                                                                                                                                                                                                                   | VERMAAK                                                                                                                          | National Institute for Communicable Diseases of the National Health Laboratory Service                                             | Amoako DG; Bhiman JN; Ismail A; Mahlangu B; Mohale T; Ntuli N; Scheepers C                                                                                                                                                                                                                                                                                                                                                                                                                                                                                                                                                                                                                                                                                                                                                                                                  |
| EPI_ISL_2360464, EPI_ISL_2360535, EPI_ISL_2360595, EPI_ISL_2360775, EPI_ISL_2360900, EPI_ISL_2360925, EPI_ISL_2494585                                                                                                                                                                                                                                                                                                                                                                                                                                                                                                                                                                              | see above                                                                                                                        | KRISP, KZn Research Innovation and Sequencing Platform                                                                             | Baillie Vicky; Giandhari Jennifer; Madhi Shabir; Naidoo Yeshnee; Pillay Sureshnee; San James; Tegally Houriyah; Tshabulla Derek; Wilkinson Eduan; de Oliveira Tulio; du Plessis Jeanine                                                                                                                                                                                                                                                                                                                                                                                                                                                                                                                                                                                                                                                                                     |
| EPI_ISL_1132714, EPI_ISL_1132715                                                                                                                                                                                                                                                                                                                                                                                                                                                                                                                                                                                                                                                                   | Vaccines and Infectious Diseases Analytics Research Unit (VIDA)                                                                  | KRISP, KZn Research Innovation and Sequencing Platform                                                                             | Baillie Vicky; Giandhari Jennifer; Madhi Shabir; Naidoo Yeshnee; Pillay Sureshnee; Tegally Houriyah; de Oliveira Tulio; du Plessis Jeanine                                                                                                                                                                                                                                                                                                                                                                                                                                                                                                                                                                                                                                                                                                                                  |
| EPI_ISL_2140695, EPI_ISL_2375990, EPI_ISL_2375993, EPI_ISL_2621061                                                                                                                                                                                                                                                                                                                                                                                                                                                                                                                                                                                                                                 | Victoria Hospital wc VHW                                                                                                         | NHLS/UCT                                                                                                                           | Arash Iranzadeh; Bruna Galvao; Carolyn Williamson; Deelan Doolabh; Diana Hardie; Gert Marais; Innocent Mudau; Kruger Marais; Lynn Tyers; Marvin Hsiao; Stephen Korsman                                                                                                                                                                                                                                                                                                                                                                                                                                                                                                                                                                                                                                                                                                      |
| EPI_ISL_419735                                                                                                                                                                                                                                                                                                                                                                                                                                                                                                                                                                                                                                                                                     | Victorian Infectious Diseases Reference Laboratory (VIDRL)                                                                       | Victorian Infectious Diseases Reference Laboratory and Microbiological Diagnostic Unit Public Health Laboratory, Doherty Institute | Caly L.; Druce J.; Sait, M.; Schultz M.; Seemann T.; Sherry, N.                                                                                                                                                                                                                                                                                                                                                                                                                                                                                                                                                                                                                                                                                                                                                                                                             |

|                                                                                                                                                                                                                                                                                                                                                                                                                                                                                                                                                                                                                                                                                                                                                           |                                                                                                                             |                                                                                                                                                                                                                                                           |                                                                                                                                                                                                                                                                                                                                                                                                                                                                                                                                                                                                                                                                                                                         |
|-----------------------------------------------------------------------------------------------------------------------------------------------------------------------------------------------------------------------------------------------------------------------------------------------------------------------------------------------------------------------------------------------------------------------------------------------------------------------------------------------------------------------------------------------------------------------------------------------------------------------------------------------------------------------------------------------------------------------------------------------------------|-----------------------------------------------------------------------------------------------------------------------------|-----------------------------------------------------------------------------------------------------------------------------------------------------------------------------------------------------------------------------------------------------------|-------------------------------------------------------------------------------------------------------------------------------------------------------------------------------------------------------------------------------------------------------------------------------------------------------------------------------------------------------------------------------------------------------------------------------------------------------------------------------------------------------------------------------------------------------------------------------------------------------------------------------------------------------------------------------------------------------------------------|
| EPI_ISL_2779343                                                                                                                                                                                                                                                                                                                                                                                                                                                                                                                                                                                                                                                                                                                                           | Vihiga County referral hospital                                                                                             | USAMRD-A, Basic Science Laboratory                                                                                                                                                                                                                        | Alan Lemtudo; Beth Mutai; Brian Andika; Carol Kifude; Clement Masakwe; Eric Muthanje; Esther Omuseni; Faith Sigei; Gathii Kimaita; George Awinda; John Waitumbi; Josphat Nyataya; Rachel Githii; Rehema Liyali; Gerth Ochoola                                                                                                                                                                                                                                                                                                                                                                                                                                                                                           |
| EPI_ISL_2802125                                                                                                                                                                                                                                                                                                                                                                                                                                                                                                                                                                                                                                                                                                                                           | Villiersdorp Clinic wc VDP                                                                                                  | NHLS/UCT                                                                                                                                                                                                                                                  | Arash Iranzadeh; Bruna Galvaio; Andrew Williams; Deelan Doolabh; Diana Harid; Geph Marais; Innocent Mudau; Lynn Tyers; Marvin Hsiao; Stephen Korsman                                                                                                                                                                                                                                                                                                                                                                                                                                                                                                                                                                    |
| EPI_ISL_2226604                                                                                                                                                                                                                                                                                                                                                                                                                                                                                                                                                                                                                                                                                                                                           | Vilniaus universitetas                                                                                                      | Institute of Biotechnology, Life Sciences Center, Vilnius University                                                                                                                                                                                      | Albertas Timinskas; Alma Gedvilaitė; Danguolė Žiogienė; Emilija Vasilūnaitė; Milda Norkienė                                                                                                                                                                                                                                                                                                                                                                                                                                                                                                                                                                                                                             |
| EPI_ISL_560405                                                                                                                                                                                                                                                                                                                                                                                                                                                                                                                                                                                                                                                                                                                                            | Vilnius University Hospital Santaros Klinikos, Vilnius University                                                           | Institute of Biotechnology, Life Sciences Center, Vilnius University and Thermo Fisher Scientific                                                                                                                                                         | Albertas Timinskas; Alma Gedvilaitė; Aurelija Zvirbliene; Daniel Naumovas; Justinas Šlikas; Laimonas Griskevičius; Ligita Jancioriene; Mindaugas Paulauskas                                                                                                                                                                                                                                                                                                                                                                                                                                                                                                                                                             |
| EPI_ISL_914884, EPI_ISL_914886                                                                                                                                                                                                                                                                                                                                                                                                                                                                                                                                                                                                                                                                                                                            | Vilnius university hospital Santaros Klinikos, Center of Laboratory Medicine                                                | Vilnius University Hospital Santaros Klinikos                                                                                                                                                                                                             | Daniel Naumovas; Dovilė Ežerskytė; Ingrida Olendraite; Justinas Šlikas; Rimvydas Norvilas                                                                                                                                                                                                                                                                                                                                                                                                                                                                                                                                                                                                                               |
| EPI_ISL_1005231                                                                                                                                                                                                                                                                                                                                                                                                                                                                                                                                                                                                                                                                                                                                           | Vilnius university hospital Santaros Klinikos, Center of Laboratory Medicine                                                | Vilnius university hospital Santaros Klinikos, Center of Laboratory Medicine                                                                                                                                                                              | Daniel Naumovas; Dovile Ezerškyte; Gytis Dudas; Ingrida Olendraite; Justinas Šlikas; Laimonas Griskevičius; Rimvydas Norvilas                                                                                                                                                                                                                                                                                                                                                                                                                                                                                                                                                                                           |
| EPI_ISL_1130199, EPI_ISL_1130202, EPI_ISL_1130204, EPI_ISL_1195116, EPI_ISL_1259431, EPI_ISL_1259432, EPI_ISL_2019505, EPI_ISL_2375017, EPI_ISL_2375062                                                                                                                                                                                                                                                                                                                                                                                                                                                                                                                                                                                                   | see above                                                                                                                   | Viollier AG                                                                                                                                                                                                                                               | Department of Biosystems Science and Engineering, ETH Zurich                                                                                                                                                                                                                                                                                                                                                                                                                                                                                                                                                                                                                                                            |
|                                                                                                                                                                                                                                                                                                                                                                                                                                                                                                                                                                                                                                                                                                                                                           |                                                                                                                             |                                                                                                                                                                                                                                                           | Andrea Patrignani; Andrea Cabral de Gouveia; Catharine Aquino; Chaoran Chen; Christian Beisel; Christiane Beckmann; Christoph Noppen; David Dreffuss; Deborah Penet; Doris Popovic; Elodie Burcklen; Emmanouil Dermitzakis; Griffin White; Henri Pegeot; Ina Nissen; Ioannis Xenarios; Ivan Topolsky; Jay Tracy; Katharina Jahn; Keith Harshman; Lara Fuhrmann; Laura Neff; Lemnat Opitz; Lorenzo Ceruti; Maria Domenica Moccia; Mauricia Redondo; Mirjam Feldkamp; Natascha Santacroce; Niko Beerenwinkel; Noemie Santamaria de Souza; Olivier Kobel; Philipp Jablonski; Ralph Schlaepbach; Rebecca Denes; Sarah Nadeau; Simon Grütter; Sophie Seidel; Tanja Stadler; Timothy Sykes                                    |
| EPI_ISL_420840, EPI_ISL_447242, EPI_ISL_513614, EPI_ISL_527524, EPI_ISL_527547, EPI_ISL_527548, EPI_ISL_527553, EPI_ISL_1785567, EPI_ISL_2135841, EPI_ISL_2135843, EPI_ISL_2135844, EPI_ISL_2135845, EPI_ISL_2968537, EPI_ISL_2968539, EPI_ISL_2968551, EPI_ISL_2968556, EPI_ISL_2968689, EPI_ISL_2968690, EPI_ISL_2968691, EPI_ISL_2968701, EPI_ISL_2968706, EPI_ISL_2968711, EPI_ISL_2968715, EPI_ISL_2968718, EPI_ISL_2968721, EPI_ISL_2968723, EPI_ISL_2968726, EPI_ISL_2968728, EPI_ISL_2968730, EPI_ISL_2968732, EPI_ISL_2982501, EPI_ISL_2982505, EPI_ISL_3133659                                                                                                                                                                                  | see above                                                                                                                   | Viral Respiratory Lab, National Institute for Biomedical Research (INRB)                                                                                                                                                                                  |                                                                                                                                                                                                                                                                                                                                                                                                                                                                                                                                                                                                                                                                                                                         |
|                                                                                                                                                                                                                                                                                                                                                                                                                                                                                                                                                                                                                                                                                                                                                           |                                                                                                                             |                                                                                                                                                                                                                                                           | Allison Black; Amuri Aziza; Andrew Rambaut; Catherine Pratt; Eddy Kinganda-Lusamaki; Edith Nkweme; Emmanuel Lokilo Lofiko; Francisca Muyembe Mawete; Gabriel Kabamba; Ian Goodfellow; James Hadfield; Jean Claude Makangara; Jean-Jacques Muyembe Tamfum; Josh Quick; Kristian Andersen; Matthias Pauthner; Michael Wiley; Nick Loman; Placide Mbaia-Kingebeni; Raphaël Lumembe; Steve Ahuka-Mundeki; Trevor Bedford                                                                                                                                                                                                                                                                                                    |
| EPI_ISL_2499907, EPI_ISL_2499912, EPI_ISL_2549198, EPI_ISL_2549199, EPI_ISL_2657327, EPI_ISL_2657330, EPI_ISL_2657332, EPI_ISL_2657333, EPI_ISL_2657334, EPI_ISL_2657335, EPI_ISL_2657354, EPI_ISL_2657355                                                                                                                                                                                                                                                                                                                                                                                                                                                                                                                                                | see above                                                                                                                   | Virology Department, Central Health Laboratory                                                                                                                                                                                                            | The Francis Crick Institute                                                                                                                                                                                                                                                                                                                                                                                                                                                                                                                                                                                                                                                                                             |
|                                                                                                                                                                                                                                                                                                                                                                                                                                                                                                                                                                                                                                                                                                                                                           |                                                                                                                             |                                                                                                                                                                                                                                                           | Bahadoor BS; Crawford M; Daniels RS; Goldstone R; Harvey R; Manraj SS; Nicod J; Patel H; Ramuth M; Sonoo J                                                                                                                                                                                                                                                                                                                                                                                                                                                                                                                                                                                                              |
| EPI_ISL_1191600, EPI_ISL_1827669, EPI_ISL_1827690, EPI_ISL_1827692                                                                                                                                                                                                                                                                                                                                                                                                                                                                                                                                                                                                                                                                                        | Virology Department, Victoria Hospital, Plaine-Wilhelms, Mauritius                                                          | National Institute for Communicable Diseases of the National Health Laboratory Service                                                                                                                                                                    | Allam M; Amoako DG; Baboo SB; Bhiman JN; Ismail A; Mahlangu B; Manraj SS; Mohale T; Ntuli N; Ramuth M; Scheepers C; Sonoo J                                                                                                                                                                                                                                                                                                                                                                                                                                                                                                                                                                                             |
| EPI_ISL_3231385, EPI_ISL_3231386, EPI_ISL_3231387, EPI_ISL_3231388, EPI_ISL_3231389, EPI_ISL_3231390, EPI_ISL_3231391, EPI_ISL_3231392, EPI_ISL_3231393, EPI_ISL_3231396, EPI_ISL_3231397, EPI_ISL_3231399, EPI_ISL_3231400, EPI_ISL_3231401, EPI_ISL_3231402, EPI_ISL_3231403                                                                                                                                                                                                                                                                                                                                                                                                                                                                            | see above                                                                                                                   | Virology Department, Central Health Laboratory                                                                                                                                                                                                            | UMR PIMIT                                                                                                                                                                                                                                                                                                                                                                                                                                                                                                                                                                                                                                                                                                               |
|                                                                                                                                                                                                                                                                                                                                                                                                                                                                                                                                                                                                                                                                                                                                                           |                                                                                                                             |                                                                                                                                                                                                                                                           | Bahadoor BS; David Wilkinson; Manraj SS; Patrick Mavingui; Ramuth M; Sonoo J                                                                                                                                                                                                                                                                                                                                                                                                                                                                                                                                                                                                                                            |
| EPI_ISL_2955336                                                                                                                                                                                                                                                                                                                                                                                                                                                                                                                                                                                                                                                                                                                                           | Virology Laboratories                                                                                                       | Erasmus Medical Center                                                                                                                                                                                                                                    | Abd Moniem Ain shoka; Amel Naguib; Anne van der Linden; Anнемiek van der Eijk; Bas Oude Munnink; Corine GeurtsvanKessel; Dalia Ramadan; David Nieuwenhuijs; Emmanuelle Munger; Galal Mahmoud; Irida Chestakova; Marion Koopmans; Marjan Boter; Mohamed Hassany; Mohamed K. Khalifa; Nancy El Guindy; Ramy Galal; Reina Sikkema; Richard Molenkamp; Salima Sayed; Shymaa A. Showky; Wael H. Roshdy; on behalf of the Dutch national COVID-19 response team.                                                                                                                                                                                                                                                              |
| EPI_ISL_2960150                                                                                                                                                                                                                                                                                                                                                                                                                                                                                                                                                                                                                                                                                                                                           | Virology Laboratories                                                                                                       | Erasmus Medical Center Department of Virology                                                                                                                                                                                                             | Abd Moniem Ain shoka; Amel Naguib; Anne van der Linden; Anнемiek van der Eijk; Bas Oude Munnink; Corine GeurtsvanKessel; Dalia Ramadan; David Nieuwenhuijs; Emmanuelle Munger; Galal Mahmoud; Irida Chestakova; Marion Koopmans; Marjan Boter; Mohamed Hassany; Mohamed K. Khalifa; Nancy El Guindy; Ramy Galal; Reina Sikkema; Richard Molenkamp; Salima Sayed; Shymaa A. Showky; Wael H. Roshdy; on behalf of the Dutch national COVID-19 response team.                                                                                                                                                                                                                                                              |
| EPI_ISL_1123282, EPI_ISL_1711646                                                                                                                                                                                                                                                                                                                                                                                                                                                                                                                                                                                                                                                                                                                          | Virology Laboratory of Praia                                                                                                | Institut Pasteur de Dakar                                                                                                                                                                                                                                 | Dia Ndongo; Diagne Moussa Moïse; Diallo Amadou; Diop Mamadou; Faye Ousmane; Kevin Sanders; Loucoubar Cheikh; Mbengue Safietou Sankhe; Ndiaye Ndack; Sall Amadou Alpha; Sanders Kevin; Sankhe Safietou; Tordo Noel; da Luz Lima Mendonça Maria                                                                                                                                                                                                                                                                                                                                                                                                                                                                           |
| EPI_ISL_1123287, EPI_ISL_1711649, EPI_ISL_1711653, EPI_ISL_1711654                                                                                                                                                                                                                                                                                                                                                                                                                                                                                                                                                                                                                                                                                        | Virology Laboratory of São Vicente                                                                                          | Institut Pasteur de Dakar                                                                                                                                                                                                                                 | Dia Ndongo; Diagne Moussa Moïse; Diallo Amadou; Diop Mamadou; Faye Ousmane; Kevin Sanders; Loucoubar Cheikh; Mbengue Safietou Sankhe; Nadia Rodrigues; Ndiaye Ndack; Sall Amadou Alpha; Sanders Kevin; Sankhe Safietou; Tordo Noel; da Luz Lima Mendonça Maria                                                                                                                                                                                                                                                                                                                                                                                                                                                          |
| EPI_ISL_508862, EPI_ISL_508863, EPI_ISL_1660225, EPI_ISL_1660227, EPI_ISL_1660249, EPI_ISL_1660255, EPI_ISL_1660257, EPI_ISL_1660273, EPI_ISL_1660274, EPI_ISL_1660287, EPI_ISL_1660290, EPI_ISL_1660300, EPI_ISL_1660301, EPI_ISL_1660312, EPI_ISL_1660315, EPI_ISL_1660329, EPI_ISL_1660330, EPI_ISL_1660336, EPI_ISL_1672387                                                                                                                                                                                                                                                                                                                                                                                                                           | see above                                                                                                                   | Virology Unit, Institut Pasteur de Madagascar                                                                                                                                                                                                             | Virology Unit, Institut Pasteur de Madagascar                                                                                                                                                                                                                                                                                                                                                                                                                                                                                                                                                                                                                                                                           |
|                                                                                                                                                                                                                                                                                                                                                                                                                                                                                                                                                                                                                                                                                                                                                           |                                                                                                                             |                                                                                                                                                                                                                                                           | Angela Brisebarre; Camille Capel; Cara Brook; Cara E. Brook; Christian Ranaivosoa; Christophe Malabat; Corinne Maurer; Cristina M. Tato; Emmanuelle Permal; Etienne Simon-Lorière; Frédéric Lemoine; Helisoa Razafimanjato; Jean-Michel Heraud; Joseph L. DeRisi; Louise Lefrançois; Marion Barbet; Maud Vanpeene; Michelle Tan; Méline Bizard; Norosoa Razanajatovo; Philippe Dussart; Soa Fy Andriamandimby; Sylvie Behillil; Sylvie van der Werf; Tsiry Randriambolanantsoa; Vida Ahyong; Vincent Enouf; Vololoinaina Raharinosy                                                                                                                                                                                     |
| EPI_ISL_918366, EPI_ISL_1532811, EPI_ISL_1534543, EPI_ISL_1711990, EPI_ISL_2106247                                                                                                                                                                                                                                                                                                                                                                                                                                                                                                                                                                                                                                                                        | Virology Unit, Institut Pasteur du Cambodge                                                                                 | Virology Unit, Institut Pasteur du Cambodge                                                                                                                                                                                                               | Cecile Troupin; Chau Darapeak; Chin Savuth; Erik A Karlsson; Etienne Simon-Loriere; Jurre Y Siegers; Kraing Sidonn; Leakhena Pum; Ly Sovann; Sokhoun Yann; Teypuita Ou; Veasna Duong; Yi Sengdoeurn                                                                                                                                                                                                                                                                                                                                                                                                                                                                                                                     |
| EPI_ISL_411902                                                                                                                                                                                                                                                                                                                                                                                                                                                                                                                                                                                                                                                                                                                                            | Virology Unit, Institut Pasteur du Cambodge.                                                                                | Virology Unit, Institut Pasteur du Cambodge (Sequencing done by: Jessica E Manning/Jennifer A Bohl at Malaria and Vector Research Research Laboratory, National Institute of Allergy and Infectious Diseases and Vida Ahyong from Chan-Zuckerberg Biohub) | Erik A Karlsson; Jennifer A Bohl; Jessica E Manning.; Philippe Dussart; Veasna Duong; Vida Ahyong                                                                                                                                                                                                                                                                                                                                                                                                                                                                                                                                                                                                                       |
| EPI_ISL_3115358, EPI_ISL_3115359                                                                                                                                                                                                                                                                                                                                                                                                                                                                                                                                                                                                                                                                                                                          | Virology laboratory, University of Maiduguri Teaching Hospital                                                              | Africa Centre for Excellence for Genomics of Infectious Diseases (ACEGID), Redeemer's University                                                                                                                                                          | A.T.; Abechi; Ajogbasile; Akano; C.A.; C.T.; Eromon; F.V.; Folarin, O.; Happi; I.B.; J.N.; J.U.; K.O.; Kayode; Nosamiefan, I.; Oguzie; Olawoye; Olumade; Oluniyi; P.E.; P.S.; T.J.; Ugwu; Uwanibe                                                                                                                                                                                                                                                                                                                                                                                                                                                                                                                       |
| EPI_ISL_2507964                                                                                                                                                                                                                                                                                                                                                                                                                                                                                                                                                                                                                                                                                                                                           | Vita Laboratoriot Oy                                                                                                        | Expert Microbiology, National Institute for Health and Welfare                                                                                                                                                                                            | Carita Savolainen-Kopra; Erika Lindh; Haider al-Hello; Janni Halkilahti; Kirsi Liitsola; Niina Ikonen; Olli Vapalahti; Pekka Ellonen; Phuoc Truong; Päivi Laurila; Ravi Kant; Sari Hannula; Soile Blomqvist; Teemu Smura                                                                                                                                                                                                                                                                                                                                                                                                                                                                                                |
| EPI_ISL_722201                                                                                                                                                                                                                                                                                                                                                                                                                                                                                                                                                                                                                                                                                                                                            | Vitalis Mostar                                                                                                              | Alea Genetic Center                                                                                                                                                                                                                                       | Konjodzic R.; Pecar D.; Salihefendic L.                                                                                                                                                                                                                                                                                                                                                                                                                                                                                                                                                                                                                                                                                 |
| EPI_ISL_2836853, EPI_ISL_2836861, EPI_ISL_2836864, EPI_ISL_2836868, EPI_ISL_2836871, EPI_ISL_2836872, EPI_ISL_2836875, EPI_ISL_2836880, EPI_ISL_2836883, EPI_ISL_2836885, EPI_ISL_2836886, EPI_ISL_2836887, EPI_ISL_2836890, EPI_ISL_2836894, EPI_ISL_2836898, EPI_ISL_2836901, EPI_ISL_2836903, EPI_ISL_2836904, EPI_ISL_2836906, EPI_ISL_2836907, EPI_ISL_2836909, EPI_ISL_2836910, EPI_ISL_2836919, EPI_ISL_2836920, EPI_ISL_2836923, EPI_ISL_2836927, EPI_ISL_2836931, EPI_ISL_2836936, EPI_ISL_2836942, EPI_ISL_2836951, EPI_ISL_2836952, EPI_ISL_2836966, EPI_ISL_2836969, EPI_ISL_2836998, EPI_ISL_2968008, EPI_ISL_2968018, EPI_ISL_2968019, EPI_ISL_2968020, EPI_ISL_2968023, EPI_ISL_2968029, EPI_ISL_2968030, EPI_ISL_3268115, EPI_ISL_3268120 | see above                                                                                                                   | WACCBIP, University of Ghana, Accra, Ghana                                                                                                                                                                                                                |                                                                                                                                                                                                                                                                                                                                                                                                                                                                                                                                                                                                                                                                                                                         |
|                                                                                                                                                                                                                                                                                                                                                                                                                                                                                                                                                                                                                                                                                                                                                           |                                                                                                                             |                                                                                                                                                                                                                                                           | : Bright K. Yemi; Collins M. Morang'a; Deborah N. A. Mettle; Dominic S. Y. Amuzu; Dominic S.Y. Amuzu; Evelyn B. Quansah; Evelyn Y. Bonney; Frederick M. Tei-Maya; Frederick Tei-Maya; Israel Osei-Wusu; Ivy A. Asante; Joe K. Mutungi; John K. Odoom; Joseph H.K. Bonney; Joyce M. Ngoi; Lawrence Ofori-Boadu; Lucas N. Amenga-Etego; Lucas N. Amenga-Etego and Gordon A. Awandare; Michael Owsui; Mildred Adusei-Poku; Nicaise T. Ndam; Oliver Cormack; Paul Owsu-Oduro; Peter K. Quashie; Philip M. Soglo; Richard Odame Phillips; Samirah Said; Samuel Armoor; Sylvester Danson; Victor Asoala; Vincent Appiah; Violette V. M'cormack; Violette V. M'cormack; William K. Ampofo; Yaw Bediako; and Gordon A. Awandare |
| EPI_ISL_427321, EPI_ISL_1797436, EPI_ISL_1797437, EPI_ISL_2523488                                                                                                                                                                                                                                                                                                                                                                                                                                                                                                                                                                                                                                                                                         | WHO National Influenza Centre Russian Federation                                                                            | WHO National Influenza Centre Russian Federation                                                                                                                                                                                                          | Andrey Komissarov; Anna Ivanova; Artem Fadeev; Daria Danilenko; Dmitry Lizovno; Elena Nabieva; Georgii Bazkin; Kirill Varchenko; Ksenia Safina; Kseniya Komissarova; Maria Pisareva; Maria Timofeeva; Mariia Sergeeva; Mikhail Bakaev; Nikita Yolshin; Oula Mansour; Tamila Musaeva; Veronika Eder                                                                                                                                                                                                                                                                                                                                                                                                                      |
| EPI_ISL_2301442                                                                                                                                                                                                                                                                                                                                                                                                                                                                                                                                                                                                                                                                                                                                           | WVT Laboratory, Corvallis, Oregon                                                                                           | OSU Center for Genome Research and Biocomputing                                                                                                                                                                                                           | Oregon State University TRACE Project                                                                                                                                                                                                                                                                                                                                                                                                                                                                                                                                                                                                                                                                                   |
| EPI_ISL_2365414, EPI_ISL_2365415, EPI_ISL_2365416, EPI_ISL_2365417                                                                                                                                                                                                                                                                                                                                                                                                                                                                                                                                                                                                                                                                                        | WWF Bayanga field laboratory                                                                                                | WWF Bayanga field laboratory                                                                                                                                                                                                                              | F. H. Leendertz; F. S. Niatou-Singa; M. Ulrich; S. Calvignac-Spencer; T. B. Tombolomako; T. Fuh-Neba; U. Vickos                                                                                                                                                                                                                                                                                                                                                                                                                                                                                                                                                                                                         |
| EPI_ISL_417083                                                                                                                                                                                                                                                                                                                                                                                                                                                                                                                                                                                                                                                                                                                                            | Washington State Department of Health                                                                                       | Seattle Flu Study                                                                                                                                                                                                                                         | Chu et al                                                                                                                                                                                                                                                                                                                                                                                                                                                                                                                                                                                                                                                                                                               |
| EPI_ISL_2422509, EPI_ISL_2422515, EPI_ISL_2422517, EPI_ISL_2422532, EPI_ISL_2422536, EPI_ISL_2422595, EPI_ISL_2422605, EPI_ISL_2422628                                                                                                                                                                                                                                                                                                                                                                                                                                                                                                                                                                                                                    | see above                                                                                                                   | West African Centre for Cell Biology of Infectious Pathogens, University of Ghana, Legon                                                                                                                                                                  | Collins M. Morang'a; Dominic S. Y. Amuzu; Edward Danso Fenteng; Emmanuel Kudjo; Evelyn B. Quansah; Frederick Tei-Maya; Joe K. Mutungi; Joyce M. Ngoi; Lucas N. Amenga-Etego and Gordon A. Awandare; Nicaise T. Ndam; Patrick Tetteh Ababio; Peter K. Quashie; Philip M. Soglo; Samirah Said; Theophilus Odoom; Vincent Appiah; Violette M'cormack; William K. Ampofo; Yaw Bediako                                                                                                                                                                                                                                                                                                                                       |
| EPI_ISL_1255107, EPI_ISL_1255109, EPI_ISL_1255110, EPI_ISL_1255160, EPI_ISL_1255163, EPI_ISL_1255164, EPI_ISL_1255166, EPI_ISL_1255168, EPI_ISL_1255186, EPI_ISL_1255231, EPI_ISL_1255234, EPI_ISL_1255238, EPI_ISL_1255250, EPI_ISL_1255277                                                                                                                                                                                                                                                                                                                                                                                                                                                                                                              | see above                                                                                                                   | West African Centre for Cell Biology of Infectious Pathogens (WACCBIP), University of Ghana, Accra, Ghana                                                                                                                                                 | : Abdoulaye B Diallo; Abdul-Karim Abass; Aisha Mohammed; Benjamin Demah Nuertey; Collins M. Morang'a; Dam Kenneth Mibut; Dominic S.Y. Amuzu; Emmanuela Amaoka4; Evelyn B. Quansah; Frederick Kumi-Ansah; Frederick Tei-Maya; Gordon A Awandare; Joyce M. Ngoi; Kesego Tapela; Lucas N. Amenga-Etego; Nelson Kibinge; Oliver D Boakye5; Peter K Quashie; Philip M. Soglo; Samirah Said; Samuel Kaba Akoriyea; Theophilus Odoom; Vanessa Magnusen; Vincent Appiah; Yaw Bediako                                                                                                                                                                                                                                            |
| EPI_ISL_1255105                                                                                                                                                                                                                                                                                                                                                                                                                                                                                                                                                                                                                                                                                                                                           | West African Centre for Cell Biology of Infectious Pathogens (WACCBIP), University of Ghana, Volta Road, Legon-Accra, Ghana | West African Centre for Cell Biology of Infectious Pathogens (WACCBIP), University of Ghana, Volta Road, Legon-Accra, Ghana                                                                                                                               | : Abdoulaye B Diallo; Abdul-Karim Abass; Aisha Mohammed; Benjamin Demah Nuertey; Collins M. Morang'a; Dam Kenneth Mibut; Dominic S.Y. Amuzu; Emmanuela Amaoka4; Evelyn B. Quansah; Frederick Kumi-Ansah; Frederick Tei-Maya; Gordon A Awandare; Joyce M. Ngoi; Kesego Tapela; Lucas N. Amenga-Etego; Nelson Kibinge; Oliver D Boakye5; Peter K Quashie; Philip M. Soglo; Samirah Said; Samuel Kaba Akoriyea; Theophilus Odoom; Vanessa Magnusen; Vincent Appiah; Yaw Bediako                                                                                                                                                                                                                                            |
| EPI_ISL_1340864                                                                                                                                                                                                                                                                                                                                                                                                                                                                                                                                                                                                                                                                                                                                           | West Bandung Public Health                                                                                                  | West Java Health Laboratory: School of Life Sciences and Technology, Institut Teknologi Bandung                                                                                                                                                           | Azzania Fibriani; Cut Nur Cinthia Alamanda; Ema Rahmawati; Isak Solihin; Karimatu Khoirunnisa; Miftahul Faridi; Rifky Waluyajati Rachman; Rini Robiani; Ryan Bayusantika Ristandi                                                                                                                                                                                                                                                                                                                                                                                                                                                                                                                                       |
| EPI_ISL_2382409                                                                                                                                                                                                                                                                                                                                                                                                                                                                                                                                                                                                                                                                                                                                           | Wisma Atlet                                                                                                                 | National Institute of Health Research and Development                                                                                                                                                                                                     | Arie Ardiansyah Nugraha; Hana Apisari Pawestri; Hartanti Dian Ikawati; Kartika Dewi Puspa; Krisna Pangesti; Nelly Puspandari; Subangkit; Triyani Soekarso; Vivi Setiawaty                                                                                                                                                                                                                                                                                                                                                                                                                                                                                                                                               |
| EPI_ISL_1196002                                                                                                                                                                                                                                                                                                                                                                                                                                                                                                                                                                                                                                                                                                                                           | Women correctional                                                                                                          | National Institute for Communicable Diseases of the National Health Laboratory Service                                                                                                                                                                    | Amoako DG; Bhiman JN; Ismail A; Mahlangu B; Maphalala GP; Mohale T; Ntuli N; Scheepers C                                                                                                                                                                                                                                                                                                                                                                                                                                                                                                                                                                                                                                |

|                                                         |                                                                                      |                                                                                                                                            |                                                                                                                                                                                                                                                                                                                                                                                                                                                                                                                                                                                                                                                                                                                                                                                                                                   |
|---------------------------------------------------------|--------------------------------------------------------------------------------------|--------------------------------------------------------------------------------------------------------------------------------------------|-----------------------------------------------------------------------------------------------------------------------------------------------------------------------------------------------------------------------------------------------------------------------------------------------------------------------------------------------------------------------------------------------------------------------------------------------------------------------------------------------------------------------------------------------------------------------------------------------------------------------------------------------------------------------------------------------------------------------------------------------------------------------------------------------------------------------------------|
| EPI_ISL_2547364                                         | Worcester Hospital wc WOC                                                            | National Health Laboratory Service/University of Cape Town (NHLS/UCT)                                                                      | Arash Iranzadeh; Bruna Galvao; Carolyn Williamson; Deelan Doolabh; Diana Hardie; Gert Marais; Innocent Mudau; Lynn Tyers; Marvin Hsiao; Stephen Korsman                                                                                                                                                                                                                                                                                                                                                                                                                                                                                                                                                                                                                                                                           |
| EPI_ISL_2727335,<br>EPI_ISL_2727347                     | ZARV/NHLS, Department Medical Virology, University of Pretoria                       | KRISP, KZn Research Innovation and Sequencing Platform                                                                                     | Adriano Mendes; Amy Strydom; Emmanuel SJ; Giandhari J; Lessells R; Micheala Davids; Naidoo Y; Pillay S; Ramphal U; Sim Mayaphi and Marietjie Venter; Tegally H; Wilkinson E; de Oliveira T                                                                                                                                                                                                                                                                                                                                                                                                                                                                                                                                                                                                                                        |
| EPI_ISL_2674012                                         | Zavod za javno zdravstvo Šibensko-Kninske Županije                                   | Hrvatski zavod za javno zdravstvo                                                                                                          | Irena Tabain; Ivana Ferenčak                                                                                                                                                                                                                                                                                                                                                                                                                                                                                                                                                                                                                                                                                                                                                                                                      |
| EPI_ISL_660069                                          | Zurita & Zurita Laboratorios                                                         | Zurita & Zurita Laboratorios                                                                                                               | Gabriela Sevellano Camilo Zurita-Salinas Karen Loaiza David Ortega-Paredes Jeannete Zurita                                                                                                                                                                                                                                                                                                                                                                                                                                                                                                                                                                                                                                                                                                                                        |
| EPI_ISL_2716621                                         | aboratoire National de Référence pour les Fièvres Héorragiques Virales, Centre Muraz | Centre Muraz                                                                                                                               | Ange Badjo; Arsène Zongo; Essia Belarbi; Fabian Leendertz; Grit Schubert; Jasmin Schlotterbeck; Saïdou Ouedraogo; Soumeiya Ouangraoua; Thérèse Kagone                                                                                                                                                                                                                                                                                                                                                                                                                                                                                                                                                                                                                                                                             |
| EPI_ISL_1644990                                         | amedes MVZ Hannover                                                                  | Robert Koch Institute                                                                                                                      |                                                                                                                                                                                                                                                                                                                                                                                                                                                                                                                                                                                                                                                                                                                                                                                                                                   |
| EPI_ISL_2094433,<br>EPI_ISL_2491373,<br>EPI_ISL_2622014 | cerballiance-IDF                                                                     | Cerba lab                                                                                                                                  | Aude Lessenne; Bénédicte Roquebert; Emmanuel Lecorche; Kader Merah; Laura Verdurme; Patrice Herisson; Sabine Trombert-Paolantoni; Stéphanie Haïm-Boukobza; Thierry Collin                                                                                                                                                                                                                                                                                                                                                                                                                                                                                                                                                                                                                                                         |
| EPI_ISL_828071,<br>EPI_ISL_828706                       | deCODE genetics                                                                      | deCODE genetics                                                                                                                            | Agnar Helgason; Alma Moller; Arna B Agustsdottir; Arnaldur Gylfason; Asgeir Sigurdsson; Aslaug Jonasdottir; Berglind Eiríksdóttir; Bjarni Thorbjörnsson; Brynjar O Jensson; Daniel F Gudbjartsson; Droplaug N Magnúsdóttir; Elisabet E Gardarsdóttir; Emil A Thorarensen; Gardar Sveinbjörnsson; Gisli Masson; Gudmundur Georgsson; Gudmundur L Norddahl; Gudrun Sigmundsdóttir; Hakon Jonsson; Hannes Eggertsson; Hilma Holm; Ingileif Jónsdóttir; Jóna Saemundsdóttir; Kamilla S Josefsdóttir; Karl Stefansson; Karl G Kristinsson; Kjartan R Gudmundsson; Kristin E Sveinsdóttir; Louise le Roux; Maney Sveinsdóttir; Olafía S Gretarsdóttir; Olafur T Magnusson; Pall Melsted; Patrick Sulem; Run Fridriksdóttir; Solví Rognvaldsson; Thora R Gunnarsdóttir; Thordur Kristjánsson; Thorolfur Guðnason; Unnur Thorsteinsdóttir |
| EPI_ISL_872226,<br>EPI_ISL_1336339,<br>EPI_ISL_1336340  | hopital                                                                              | National Reference Center for Viruses of Respiratory Infections, Institut Pasteur, Paris                                                   | Angela Brisebarre; Camille Capel; Combe Patrice; Etienne Simon-Lorière; Gastli Nabil; Marion Barbet; Maud Vanpeene; Méline Bizard; Sylvie Behillil; Sylvie van der Werf; Vincent Enouf                                                                                                                                                                                                                                                                                                                                                                                                                                                                                                                                                                                                                                            |
| EPI_ISL_1696154,<br>EPI_ISL_1696182                     | laboratoire Belle Epine                                                              | Department of Virology, Henri Mondor University Hospital, Assistance Publique Hôpitaux de Paris, Université Paris-Est Créteil, INSERM U955 | Alexandre Soulier; Christophe Rodriguez; Elisabeth Trawinski; Guillaume Gricourt; Jean-Michel Pawlotsky; Melissa N'Debi; Slim Fourati; Vanessa Demontant                                                                                                                                                                                                                                                                                                                                                                                                                                                                                                                                                                                                                                                                          |
| EPI_ISL_1235687                                         | laboratorio de salud pública (Bogotá)                                                | Gencore- Universidad de los Andes                                                                                                          | Alejandro Gómez; David González; Johana Hernandez Gabriela Delgado; Luisa Sacristán; Marcela Guevara-Suarez; Silvia Restrepo                                                                                                                                                                                                                                                                                                                                                                                                                                                                                                                                                                                                                                                                                                      |
| EPI_ISL_458285                                          | unknown                                                                              | Bundeswehr Institute of Microbiology                                                                                                       | Antwerpen; Bestehorn-Willmann; Eckstein, S.; Handrick, S.; M.C.; M.H.; M.S.; Najja, H.; R. and Ben Moussa, M.; Rehn, A.; Stoecker, K.; Walter; Woelfel                                                                                                                                                                                                                                                                                                                                                                                                                                                                                                                                                                                                                                                                            |
| EPI_ISL_463001                                          | unknown                                                                              | Clinical virology                                                                                                                          | Fares, W.; Triki, H.                                                                                                                                                                                                                                                                                                                                                                                                                                                                                                                                                                                                                                                                                                                                                                                                              |
| EPI_ISL_437612                                          | unknown                                                                              | Faculty of Medicine                                                                                                                        | Buathong, R.; Bunprakob, S.; Ghai, S.; Joyjinda, Y.; Mungaomkiang, A.; Petcharat, S.; Pijpat; Prasithsirikul, W.; Rodpan, A.; Sirichan, N.; T. and Hemachudha, T.; Wacharapluesadee, S.                                                                                                                                                                                                                                                                                                                                                                                                                                                                                                                                                                                                                                           |

**Supplementary Table 3 Aggregated locations in the phylogeographic analysis.**

Several countries have reported only very few A.27 genomes on GISAID, which could lead to problems reliably estimating their incoming and outgoing transition rates in a phylogeographic analysis. To mitigate this, we have aggregated African countries according to the five United Nations subregions, and the European countries according to the United Nations geoscheme, with the exception of France and Germany, as they were the focal points of our study, having contributed many A.27 genomes.

| <b>Location</b>     | <b>Countries included in this location</b>                 | <b>Number of sequences</b> |
|---------------------|------------------------------------------------------------|----------------------------|
| Asia-Pacific (APAC) | India, Australia, Indonesia                                | 4                          |
| Benelux             | Belgium, The Netherlands, Luxembourg                       | 33                         |
| Eastern Africa      | Rwanda, Mayotte                                            | 13                         |
| Middle Africa       | Cameroon, Gabon                                            | 2                          |
| Northern Africa     | Tunisia                                                    | 7                          |
| Southern Africa     | South Africa                                               | 0                          |
| Western Africa      | Togo, Côte d'Ivoire, Burkina Faso, Benin, Senegal, Nigeria | 75                         |
| North America       | USA                                                        | 6                          |
| Eastern Europe      | Slovenia                                                   | 37                         |
| Northern Europe     | Denmark, Sweden, UK, Ireland                               | 27                         |
| Southern Europe     | Greece, Spain, Italy, Turkey                               | 24                         |
| Western Europe      | Austria, Switzerland                                       | 28                         |
| France              | France                                                     | 112                        |
| Germany             | Germany                                                    | 193                        |
