# Supplementary material for: Antibody escape and global spread of SARS-CoV-2 lineage A.27
Source: PubMed Central journal article supplement (PMC8894356; doi:10.1038/s41467-022-28766-y), 2022-03-03
Supplement: 41467_2022_28766_MOESM3_ESM.pdf [file 41467_2022_28766_MOESM3_ESM.pdf]

## **Description of Additional Supplementary Files**

File Name: Supplementary Data 1

Description: Input XML files of the phylogeographic analysis.

File Name: Supplementary Data 2

Description: Accession numbers of all A.27 sequences and associated metadata obtained from the RKI (available via [https://github.com/robert-koch-institut/SARS-CoV-2-Sequenzdaten\\_aus\\_Deutschland](https://github.com/robert-koch-institut/SARS-CoV-2-Sequenzdaten_aus_Deutschland)).
